# Supplementary material for: Bis(m-Iodo)-Tetrakis(<em>O</em>-Methyl <em>N</em>-Phenylthiocarbamate)-Tetraiodo-Dibismuth
Source: Preprints.org preprint supplement (doi:10.20944/preprints202205.0129.v1), 2022-05-10
Supplement: Supplementary file 1 [file supplementary]

# Bis( $\mu$ -iodo)-tetrakis(*O*-methyl *N*-phenylthiocarbamate)-tetraiodo-dibismuth

Wafa Arar<sup>1</sup>, Abderrahim Khatyr<sup>2</sup>, Michael Knorr<sup>2,\*</sup>, Carsten Strohmann<sup>3</sup> and Annika Schmidt<sup>3</sup>

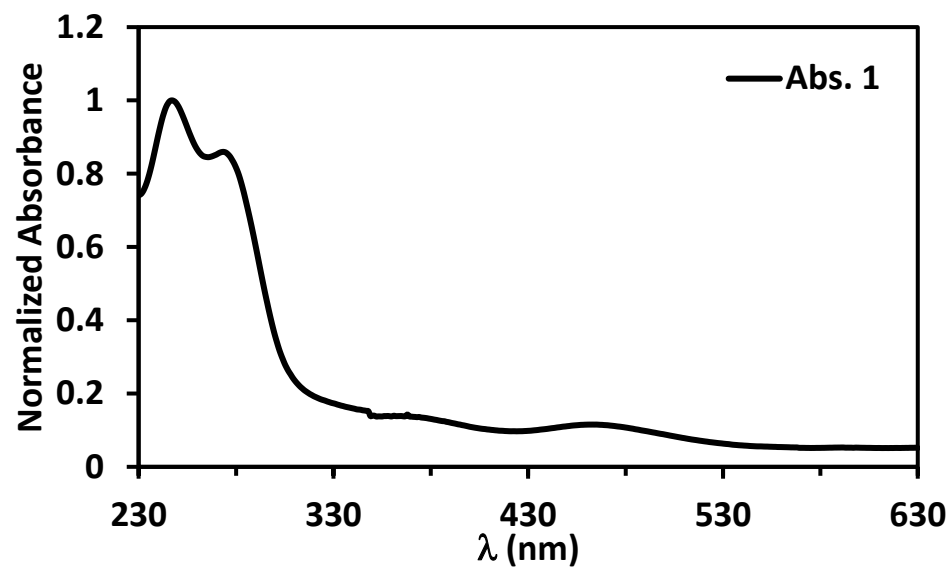

**Figure 1.** UV-visible absorption spectrum of compound **1** in acetone solution at room temperature

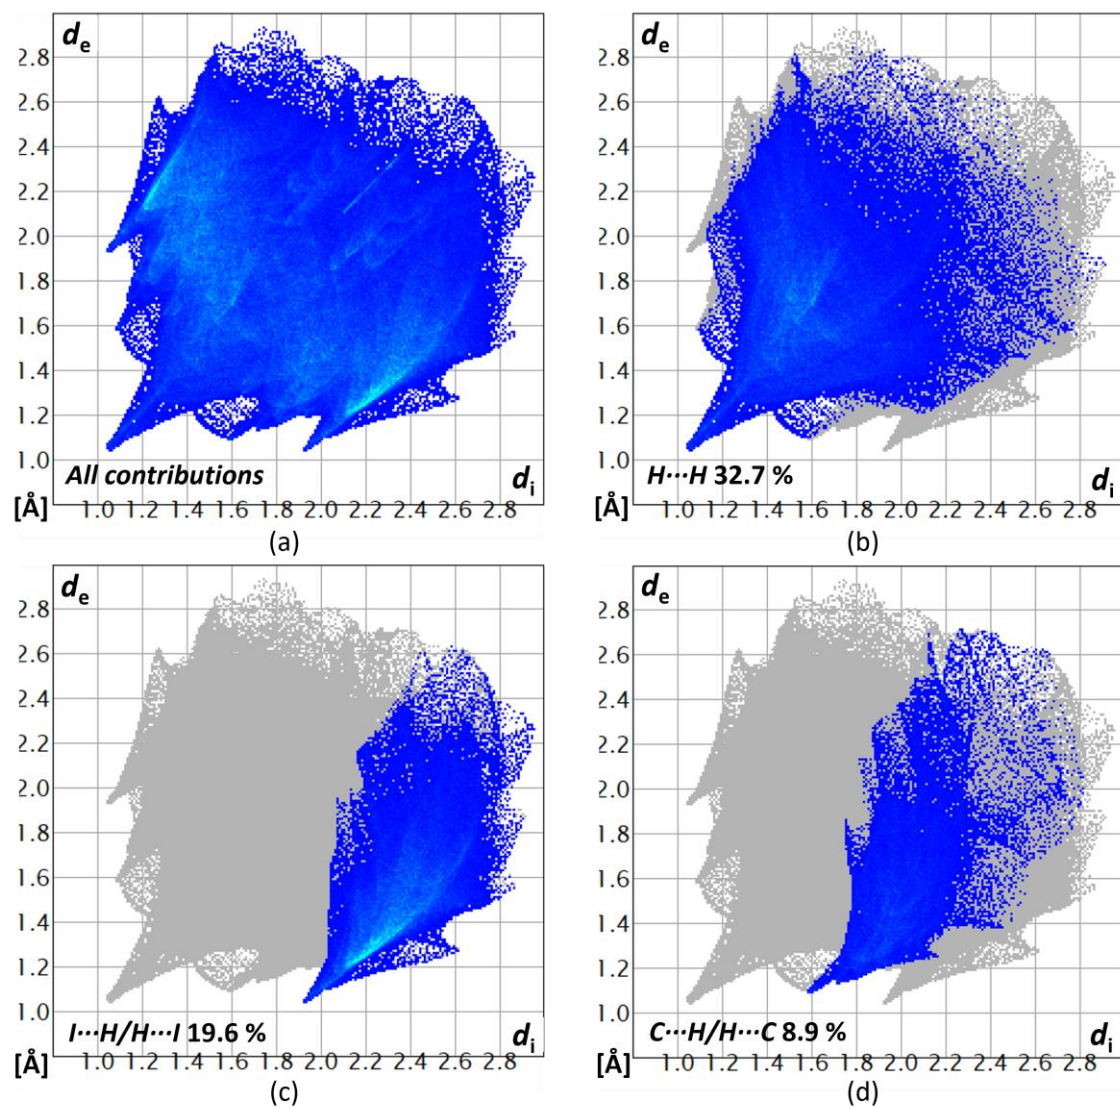

**Figure 2.** Hirshfeld fingerprint plots of compound 1
