# Supplementary material for: Bis(m-Iodo)-Tetrakis(<em>O</em>-Methyl <em>N</em>-Phenylthiocarbamate)-Tetraiodo-Dibismuth
Source: Preprints.org preprint supplement (doi:10.20944/preprints202205.0129.v1), 2022-05-10
Supplement: Supplementary file 3 [file supplementary]

Archive with 5 entries (5 files):
- B2262_Compound 1.cif
- checkCIFreport_B2262 Compound 1.pdf
- Molfile 3000 compound 1 Bi2I6.mol
- Molfile compound 1 Bi2I6.mol
- Supporting Material.pdf
