# Supplementary material for: Bis(m-Iodo)-Tetrakis(<em>O</em>-Methyl <em>N</em>-Phenylthiocarbamate)-Tetraiodo-Dibismuth
Source: Preprints.org preprint supplement (doi:10.20944/preprints202205.0129.v1), 2022-05-10
Supplement: Supplementary file 3 [file supplementary › B2262_Compound 1.cif]

data_mo_b2262_0m
_audit_creation_date               2021-08-17
_audit_creation_method
;
Olex2 1.5-alpha
(compiled 2021.07.19 svn.r715e62df for OlexSys, GUI svn.r6383)
;
_shelx_SHELXL_version_number       '2018/3'
_audit_contact_author_address      ?
_audit_contact_author_email        ?
_audit_contact_author_name         ''
_audit_contact_author_phone        ?
_publ_contact_author_id_orcid      ?
_publ_section_references
;
Dolomanov, O.V., Bourhis, L.J., Gildea, R.J, Howard, J.A.K. & Puschmann, H.
 (2009), J. Appl. Cryst. 42, 339-341.

Sheldrick, G.M. (2008). Acta Cryst. A64, 112-122.

Sheldrick, G.M. (2015). Acta Cryst. A71, 3-8.
;
_chemical_name_common              ?
_chemical_name_systematic          ?
_chemical_formula_moiety           'C32 H36 Bi2 I6 N4 O4 S4'
_chemical_formula_sum              'C32 H36 Bi2 I6 N4 O4 S4'
_chemical_formula_weight           1848.25
_chemical_melting_point            ?
loop_
  _atom_type_symbol
  _atom_type_description
  _atom_type_scat_dispersion_real
  _atom_type_scat_dispersion_imag
  _atom_type_scat_source
 'C' 'C' 0.0033 0.0016 'International Tables Vol C Tables 4.2.6.8 and 6.1.1.4'
 'H' 'H' 0.0000 0.0000 'International Tables Vol C Tables 4.2.6.8 and 6.1.1.4'
 'Bi' 'Bi' -4.1077 10.2566
 'International Tables Vol C Tables 4.2.6.8 and 6.1.1.4'
 'I' 'I' -0.4742 1.8119 'International Tables Vol C Tables 4.2.6.8 and 6.1.1.4'
 'N' 'N' 0.0061 0.0033 'International Tables Vol C Tables 4.2.6.8 and 6.1.1.4'
 'O' 'O' 0.0106 0.0060 'International Tables Vol C Tables 4.2.6.8 and 6.1.1.4'
 'S' 'S' 0.1246 0.1234 'International Tables Vol C Tables 4.2.6.8 and 6.1.1.4'

_shelx_space_group_comment
;
The symmetry employed for this shelxl refinement is uniquely defined
by the following loop, which should always be used as a source of
symmetry information in preference to the above space-group names.
They are only intended as comments.
;
_space_group_crystal_system        'triclinic'
_space_group_IT_number             2
_space_group_name_H-M_alt          'P -1'
_space_group_name_Hall             '-P 1'
loop_
  _space_group_symop_operation_xyz
 'x, y, z'
 '-x, -y, -z'

_cell_length_a                     12.8215(6)
_cell_length_b                     13.5748(6)
_cell_length_c                     15.1534(8)
_cell_angle_alpha                  85.829(2)
_cell_angle_beta                   73.537(2)
_cell_angle_gamma                  68.789(2)
_cell_volume                       2356.7(2)
_cell_formula_units_Z              2
_cell_measurement_reflns_used      3331
_cell_measurement_temperature      100.0
_cell_measurement_theta_max        23.26
_cell_measurement_theta_min        2.55
_shelx_estimated_absorpt_T_max     0.485
_shelx_estimated_absorpt_T_min     0.275
_exptl_absorpt_coefficient_mu      11.602
_exptl_absorpt_correction_T_max    0.4330
_exptl_absorpt_correction_T_min    0.2548
_exptl_absorpt_correction_type     multi-scan
_exptl_absorpt_process_details
;
SADABS-2016/2 (Bruker,2016/2) was used for absorption correction.
wR2(int) was 0.1206 before and 0.0523 after correction.
The Ratio of minimum to maximum transmission is 0.5885.
The \l/2 correction factor is Not present.
;
_exptl_absorpt_special_details     ?
_exptl_crystal_colour              yellow
_exptl_crystal_colour_lustre       .
_exptl_crystal_colour_modifier     .
_exptl_crystal_colour_primary      yellow
_exptl_crystal_density_diffrn      2.605
_exptl_crystal_density_meas        ?
_exptl_crystal_density_method      ?
_exptl_crystal_description         block
_exptl_crystal_F_000               1672
_exptl_crystal_size_max            0.15
_exptl_crystal_size_mid            0.113
_exptl_crystal_size_min            0.073
_exptl_transmission_factor_max     ?
_exptl_transmission_factor_min     ?
_diffrn_reflns_av_R_equivalents    0.0439
_diffrn_reflns_av_unetI/netI       0.0294
_diffrn_reflns_Laue_measured_fraction_full  1.000
_diffrn_reflns_Laue_measured_fraction_max  0.999
_diffrn_reflns_limit_h_max         18
_diffrn_reflns_limit_h_min         -18
_diffrn_reflns_limit_k_max         19
_diffrn_reflns_limit_k_min         -19
_diffrn_reflns_limit_l_max         21
_diffrn_reflns_limit_l_min         -21
_diffrn_reflns_number              104055
_diffrn_reflns_point_group_measured_fraction_full  1.000
_diffrn_reflns_point_group_measured_fraction_max  0.999
_diffrn_reflns_theta_full          25.242
_diffrn_reflns_theta_max           30.560
_diffrn_reflns_theta_min           1.773
_diffrn_ambient_temperature        100.0
_diffrn_detector                   'Bruker D8 VENTURE area detector'
_diffrn_detector_area_resol_mean   10.4167
_diffrn_detector_type              'CPAD PHOTON II area detector'
_diffrn_measured_fraction_theta_full  1.000
_diffrn_measured_fraction_theta_max  0.999
_diffrn_measurement_device         'four-circle diffractometer'
_diffrn_measurement_device_type    'Bruker D8 Venture'
_diffrn_measurement_method         '\w and \f scans'
_diffrn_radiation_monochromator    'HELIOS mirror optics'
_diffrn_radiation_probe            x-ray
_diffrn_radiation_type             MoK\a
_diffrn_radiation_wavelength       0.71073
_diffrn_source                     'microfocus sealed X-ray tube'
_diffrn_source_current             1.0
_diffrn_source_power               0.05
_diffrn_source_type                'Incoatec I\ms'
_diffrn_source_voltage             50.0
_diffrn_standards_number           0
_reflns_Friedel_coverage           0.000
_reflns_Friedel_fraction_full      .
_reflns_Friedel_fraction_max       .
_reflns_number_gt                  12134
_reflns_number_total               14441
_reflns_special_details
;
 Reflections were merged by SHELXL according to the crystal
 class for the calculation of statistics and refinement.
 
 _reflns_Friedel_fraction is defined as the number of unique
 Friedel pairs measured divided by the number that would be
 possible theoretically, ignoring centric projections and
 systematic absences.
;
_reflns_threshold_expression       'I > 2\s(I)'
_computing_cell_refinement         'SAINT V8.40B (?, 2016)'
_computing_data_collection         ?
_computing_data_reduction          'SAINT V8.40B (?, 2016)'
_computing_molecular_graphics      'Olex2 1.5-alpha (Dolomanov et al., 2009)'
_computing_publication_material    'Olex2 1.5-alpha (Dolomanov et al., 2009)'
_computing_structure_refinement    'XL  (Sheldrick, 2008)'
_computing_structure_solution      'XT  (Sheldrick, 2015)'
_refine_diff_density_max           1.481
_refine_diff_density_min           -1.512
_refine_diff_density_rms           0.184
_refine_ls_extinction_coef         .
_refine_ls_extinction_method       none
_refine_ls_goodness_of_fit_ref     1.082
_refine_ls_hydrogen_treatment      mixed
_refine_ls_matrix_type             full
_refine_ls_number_parameters       489
_refine_ls_number_reflns           14441
_refine_ls_number_restraints       0
_refine_ls_R_factor_all            0.0410
_refine_ls_R_factor_gt             0.0286
_refine_ls_restrained_S_all        1.082
_refine_ls_shift/su_max            0.004
_refine_ls_shift/su_mean           0.000
_refine_ls_structure_factor_coef   Fsqd
_refine_ls_weighting_details      
 'w=1/[\s^2^(Fo^2^)+(0.0110P)^2^+5.3429P] where P=(Fo^2^+2Fc^2^)/3'
_refine_ls_weighting_scheme        calc
_refine_ls_wR_factor_gt            0.0470
_refine_ls_wR_factor_ref           0.0513
_refine_special_details            ?
_olex2_refinement_description
;
1. Fixed Uiso
 At 1.2 times of:
  All C(H) groups
 At 1.5 times of:
  All C(H,H,H) groups
2.a Aromatic/amide H refined with riding coordinates:
 C3(H3A), C4(H4A), C5(H5), C6(H6), C7(H7), C11(H11), C12(H12), C13(H13),
 C14(H14), C15(H15), C19(H19), C20(H20), C21(H21), C22(H22), C23(H23), C27(H27),
  C28(H28), C29(H29), C30(H30), C31(H31)
2.b Idealised Me refined as rotating group:
 C8(H8A,H8B,H8C), C16(H16A,H16B,H16C), C24(H24A,H24B,H24C), C32(H32A,H32B,H32C)
;
_atom_sites_solution_hydrogens     mixed
_atom_sites_solution_primary       dual
_atom_sites_solution_secondary     ?
loop_
  _atom_site_label
  _atom_site_type_symbol
  _atom_site_fract_x
  _atom_site_fract_y
  _atom_site_fract_z
  _atom_site_U_iso_or_equiv
  _atom_site_adp_type
  _atom_site_occupancy
  _atom_site_site_symmetry_order
  _atom_site_calc_flag
  _atom_site_refinement_flags_posn
  _atom_site_refinement_flags_adp
  _atom_site_refinement_flags_occupancy
  _atom_site_disorder_assembly
  _atom_site_disorder_group
 Bi1 Bi 0.30656(2) 0.10555(2) 0.83041(2) 0.01620(3) Uani 1 1 d . . . . .
 Bi2 Bi 0.18791(2) 0.41444(2) 0.66391(2) 0.01536(3) Uani 1 1 d . . . . .
 I1 I 0.53883(2) -0.02856(2) 0.85067(2) 0.01951(5) Uani 1 1 d . . . . .
 I2 I 0.17334(2) -0.02001(2) 0.92816(2) 0.02636(6) Uani 1 1 d . . . . .
 I3 I 0.42487(2) 0.26779(2) 0.70908(2) 0.01915(5) Uani 1 1 d . . . . .
 I4 I 0.06949(2) 0.25719(2) 0.78873(2) 0.01814(5) Uani 1 1 d . . . . .
 I5 I 0.30103(2) 0.55220(2) 0.55821(2) 0.02281(6) Uani 1 1 d . . . . .
 I6 I -0.04697(2) 0.54198(2) 0.64786(2) 0.01916(5) Uani 1 1 d . . . . .
 S1 S 0.24432(8) 0.20678(8) 1.00436(7) 0.0223(2) Uani 1 1 d . . . . .
 S2 S 0.36891(9) 0.00667(9) 0.65227(8) 0.0291(2) Uani 1 1 d . . . . .
 S3 S 0.12687(9) 0.51768(9) 0.84153(7) 0.0257(2) Uani 1 1 d . . . . .
 S4 S 0.25196(8) 0.29446(8) 0.49941(7) 0.02008(19) Uani 1 1 d . . . . .
 O00G O 0.1897(2) 0.1354(2) 0.4720(2) 0.0239(6) Uani 1 1 d . . . . .
 O1 O 0.2998(2) 0.3729(2) 1.0258(2) 0.0276(7) Uani 1 1 d . . . . .
 O2 O 0.3153(2) -0.1544(2) 0.6161(2) 0.0268(7) Uani 1 1 d . . . . .
 O3 O 0.1855(2) 0.6702(2) 0.8901(2) 0.0256(6) Uani 1 1 d . . . . .
 N1 N 0.4484(3) 0.2321(3) 0.9535(2) 0.0190(7) Uani 1 1 d . . . . .
 N2 N 0.1652(3) -0.0194(3) 0.6935(2) 0.0212(7) Uani 1 1 d . . . . .
 N3 N 0.3299(3) 0.5460(3) 0.7947(2) 0.0199(7) Uani 1 1 d . . . . .
 N4 N 0.0435(3) 0.2750(3) 0.5493(2) 0.0172(6) Uani 1 1 d . . . . .
 C1 C 0.3354(3) 0.2754(3) 0.9933(3) 0.0178(7) Uani 1 1 d . . . . .
 C2 C 0.5387(3) 0.2745(3) 0.9340(3) 0.0168(7) Uani 1 1 d . . . . .
 C3 C 0.6514(3) 0.2009(3) 0.9229(3) 0.0201(8) Uani 1 1 d . . . . .
 H3A H 0.663437 0.127903 0.930551 0.024 Uiso 1 1 calc R U . . .
 C4 C 0.7458(3) 0.2343(3) 0.9008(3) 0.0214(8) Uani 1 1 d . . . . .
 H4A H 0.822281 0.184234 0.893225 0.026 Uiso 1 1 calc R U . . .
 C5 C 0.7281(3) 0.3410(3) 0.8898(3) 0.0213(8) Uani 1 1 d . . . . .
 H5 H 0.792520 0.364065 0.874395 0.026 Uiso 1 1 calc R U . . .
 C6 C 0.6158(3) 0.4143(3) 0.9013(3) 0.0214(8) Uani 1 1 d . . . . .
 H6 H 0.603975 0.487294 0.894045 0.026 Uiso 1 1 calc R U . . .
 C7 C 0.5210(3) 0.3815(3) 0.9232(3) 0.0196(8) Uani 1 1 d . . . . .
 H7 H 0.444594 0.431730 0.930802 0.023 Uiso 1 1 calc R U . . .
 C8 C 0.1772(4) 0.4238(4) 1.0735(4) 0.0391(12) Uani 1 1 d . . . . .
 H8A H 0.130171 0.427657 1.031597 0.059 Uiso 1 1 calc R U . . .
 H8B H 0.163122 0.495383 1.094267 0.059 Uiso 1 1 calc R U . . .
 H8C H 0.155786 0.382694 1.126889 0.059 Uiso 1 1 calc R U . . .
 C9 C 0.2791(3) -0.0601(3) 0.6549(3) 0.0216(8) Uani 1 1 d . . . . .
 C10 C 0.0764(3) -0.0643(3) 0.7100(3) 0.0196(8) Uani 1 1 d . . . . .
 C11 C -0.0372(3) 0.0070(3) 0.7298(3) 0.0237(8) Uani 1 1 d . . . . .
 H11 H -0.051942 0.080819 0.729915 0.028 Uiso 1 1 calc R U . . .
 C12 C -0.1298(4) -0.0294(3) 0.7495(3) 0.0271(9) Uani 1 1 d . . . . .
 H12 H -0.207678 0.019372 0.764245 0.033 Uiso 1 1 calc R U . . .
 C13 C -0.1076(4) -0.1372(3) 0.7475(3) 0.0256(9) Uani 1 1 d . . . . .
 H13 H -0.170064 -0.162691 0.760535 0.031 Uiso 1 1 calc R U . . .
 C14 C 0.0061(4) -0.2072(3) 0.7265(3) 0.0276(9) Uani 1 1 d . . . . .
 H14 H 0.020742 -0.280880 0.724688 0.033 Uiso 1 1 calc R U . . .
 C15 C 0.0997(4) -0.1727(3) 0.7080(3) 0.0247(9) Uani 1 1 d . . . . .
 H15 H 0.177371 -0.221792 0.694265 0.030 Uiso 1 1 calc R U . . .
 C16 C 0.4395(4) -0.2091(4) 0.5745(3) 0.0325(10) Uani 1 1 d . . . . .
 H16A H 0.468288 -0.167002 0.524823 0.049 Uiso 1 1 calc R U . . .
 H16B H 0.452363 -0.278308 0.549304 0.049 Uiso 1 1 calc R U . . .
 H16C H 0.481419 -0.218651 0.621274 0.049 Uiso 1 1 calc R U . . .
 C17 C 0.2183(3) 0.5818(3) 0.8417(3) 0.0199(8) Uani 1 1 d . . . . .
 C18 C 0.4196(3) 0.5890(3) 0.7821(3) 0.0178(7) Uani 1 1 d . . . . .
 C19 C 0.5204(3) 0.5414(3) 0.7116(3) 0.0195(8) Uani 1 1 d . . . . .
 H19 H 0.524475 0.486290 0.674077 0.023 Uiso 1 1 calc R U . . .
 C20 C 0.6145(3) 0.5740(3) 0.6960(3) 0.0220(8) Uani 1 1 d . . . . .
 H20 H 0.683409 0.540988 0.648337 0.026 Uiso 1 1 calc R U . . .
 C21 C 0.6075(3) 0.6551(3) 0.7505(3) 0.0215(8) Uani 1 1 d . . . . .
 H21 H 0.671486 0.678348 0.739754 0.026 Uiso 1 1 calc R U . . .
 C22 C 0.5076(4) 0.7022(3) 0.8203(3) 0.0246(9) Uani 1 1 d . . . . .
 H22 H 0.503636 0.757930 0.857065 0.029 Uiso 1 1 calc R U . . .
 C23 C 0.4127(3) 0.6697(3) 0.8380(3) 0.0216(8) Uani 1 1 d . . . . .
 H23 H 0.344831 0.701668 0.886880 0.026 Uiso 1 1 calc R U . . .
 C24 C 0.0648(4) 0.7185(4) 0.9435(3) 0.0334(10) Uani 1 1 d . . . . .
 H24A H 0.014032 0.732159 0.902816 0.050 Uiso 1 1 calc R U . . .
 H24B H 0.053753 0.785383 0.972041 0.050 Uiso 1 1 calc R U . . .
 H24C H 0.045188 0.670702 0.991487 0.050 Uiso 1 1 calc R U . . .
 C25 C 0.1562(3) 0.2310(3) 0.5085(3) 0.0178(7) Uani 1 1 d . . . . .
 C26 C -0.0496(3) 0.2363(3) 0.5652(3) 0.0162(7) Uani 1 1 d . . . . .
 C27 C -0.1469(3) 0.2864(3) 0.6371(3) 0.0207(8) Uani 1 1 d . . . . .
 H27 H -0.146812 0.340796 0.673048 0.025 Uiso 1 1 calc R U . . .
 C28 C -0.2441(3) 0.2574(3) 0.6566(3) 0.0225(8) Uani 1 1 d . . . . .
 H28 H -0.310843 0.292089 0.705443 0.027 Uiso 1 1 calc R U . . .
 C29 C -0.2425(3) 0.1768(3) 0.6036(3) 0.0241(9) Uani 1 1 d . . . . .
 H29 H -0.308637 0.156363 0.616390 0.029 Uiso 1 1 calc R U . . .
 C30 C -0.1450(3) 0.1265(3) 0.5325(3) 0.0235(8) Uani 1 1 d . . . . .
 H30 H -0.144682 0.071411 0.497154 0.028 Uiso 1 1 calc R U . . .
 C31 C -0.0474(3) 0.1554(3) 0.5121(3) 0.0221(8) Uani 1 1 d . . . . .
 H31 H 0.019255 0.120902 0.463157 0.027 Uiso 1 1 calc R U . . .
 C32 C 0.3106(4) 0.0836(3) 0.4211(3) 0.0326(10) Uani 1 1 d . . . . .
 H32A H 0.331841 0.127318 0.369745 0.049 Uiso 1 1 calc R U . . .
 H32B H 0.321315 0.014481 0.397011 0.049 Uiso 1 1 calc R U . . .
 H32C H 0.360253 0.074084 0.462013 0.049 Uiso 1 1 calc R U . . .
 H1 H 0.470(4) 0.171(3) 0.939(3) 0.016(11) Uiso 1 1 d . . . . .
 H4 H 0.028(4) 0.331(4) 0.570(3) 0.025(13) Uiso 1 1 d . . . . .
 H3 H 0.352(4) 0.489(4) 0.766(3) 0.025(13) Uiso 1 1 d . . . . .
 H2 H 0.142(4) 0.039(4) 0.712(3) 0.024(13) Uiso 1 1 d . . . . .

loop_
  _atom_site_aniso_label
  _atom_site_aniso_U_11
  _atom_site_aniso_U_22
  _atom_site_aniso_U_33
  _atom_site_aniso_U_23
  _atom_site_aniso_U_13
  _atom_site_aniso_U_12
 Bi1 0.01295(7) 0.01674(6) 0.02004(8) 0.00191(6) -0.00545(6) -0.00615(5)
 Bi2 0.01268(6) 0.01644(6) 0.01771(7) 0.00072(5) -0.00484(5) -0.00560(5)
 I1 0.01485(11) 0.01753(11) 0.02623(14) 0.00026(10) -0.00790(10) -0.00407(9)
 I2 0.02609(14) 0.02756(13) 0.03227(16) 0.01147(12) -0.01148(12) -0.01684(11)
 I3 0.01275(11) 0.02000(11) 0.02503(14) 0.00357(10) -0.00575(10) -0.00637(9)
 I4 0.01307(11) 0.01963(11) 0.02190(13) 0.00394(10) -0.00551(10) -0.00614(9)
 I5 0.02638(13) 0.02504(13) 0.02136(13) 0.00359(10) -0.00578(11) -0.01533(11)
 I6 0.01485(11) 0.01829(11) 0.02422(13) -0.00038(10) -0.00808(10) -0.00353(9)
 S1 0.0165(5) 0.0286(5) 0.0228(5) -0.0022(4) -0.0026(4) -0.0108(4)
 S2 0.0204(5) 0.0392(6) 0.0286(6) -0.0107(5) 0.0021(4) -0.0162(5)
 S3 0.0180(5) 0.0371(6) 0.0230(5) -0.0087(4) 0.0014(4) -0.0148(4)
 S4 0.0152(4) 0.0242(5) 0.0210(5) -0.0031(4) -0.0016(4) -0.0091(4)
 O00G 0.0156(13) 0.0249(14) 0.0303(17) -0.0108(12) -0.0001(12) -0.0087(11)
 O1 0.0173(14) 0.0284(15) 0.0333(18) -0.0135(13) 0.0034(13) -0.0087(12)
 O2 0.0160(14) 0.0261(15) 0.0347(18) -0.0109(13) -0.0032(13) -0.0042(11)
 O3 0.0152(13) 0.0306(15) 0.0293(17) -0.0114(13) -0.0007(12) -0.0081(12)
 N1 0.0159(16) 0.0175(16) 0.0242(19) -0.0003(14) -0.0048(14) -0.0071(13)
 N2 0.0164(16) 0.0209(17) 0.0255(19) -0.0064(15) -0.0022(14) -0.0072(13)
 N3 0.0136(15) 0.0209(16) 0.0240(19) -0.0059(14) -0.0035(14) -0.0049(13)
 N4 0.0142(15) 0.0172(15) 0.0201(18) -0.0028(13) -0.0039(13) -0.0054(12)
 C1 0.0164(18) 0.0224(18) 0.0142(18) -0.0008(15) -0.0041(15) -0.0064(14)
 C2 0.0154(17) 0.0218(18) 0.0159(19) 0.0005(15) -0.0061(15) -0.0083(14)
 C3 0.0176(18) 0.0189(18) 0.023(2) 0.0005(16) -0.0059(16) -0.0052(15)
 C4 0.0136(18) 0.0224(19) 0.026(2) -0.0033(16) -0.0054(16) -0.0035(14)
 C5 0.0156(18) 0.027(2) 0.021(2) -0.0027(16) -0.0026(16) -0.0090(15)
 C6 0.023(2) 0.0199(18) 0.023(2) 0.0024(16) -0.0052(17) -0.0106(15)
 C7 0.0177(18) 0.0200(18) 0.020(2) -0.0015(15) -0.0059(16) -0.0042(14)
 C8 0.022(2) 0.035(3) 0.051(3) -0.019(2) 0.007(2) -0.0077(19)
 C9 0.0194(19) 0.028(2) 0.019(2) -0.0026(16) -0.0056(16) -0.0092(16)
 C10 0.0175(18) 0.0265(19) 0.018(2) 0.0014(16) -0.0081(16) -0.0093(15)
 C11 0.022(2) 0.0213(19) 0.027(2) 0.0003(17) -0.0054(17) -0.0082(16)
 C12 0.020(2) 0.029(2) 0.031(2) 0.0032(19) -0.0053(18) -0.0085(17)
 C13 0.024(2) 0.031(2) 0.028(2) 0.0058(18) -0.0090(18) -0.0155(17)
 C14 0.032(2) 0.025(2) 0.030(2) 0.0032(18) -0.010(2) -0.0146(18)
 C15 0.0192(19) 0.0226(19) 0.031(2) -0.0024(17) -0.0064(18) -0.0057(16)
 C16 0.016(2) 0.030(2) 0.043(3) -0.010(2) -0.0015(19) -0.0018(17)
 C17 0.0174(18) 0.0256(19) 0.018(2) -0.0018(16) -0.0036(16) -0.0091(15)
 C18 0.0155(17) 0.0191(17) 0.019(2) 0.0024(15) -0.0054(15) -0.0059(14)
 C19 0.0182(18) 0.0171(17) 0.021(2) -0.0011(15) -0.0053(16) -0.0038(14)
 C20 0.0172(18) 0.025(2) 0.023(2) 0.0004(17) -0.0031(16) -0.0086(15)
 C21 0.0210(19) 0.0229(19) 0.025(2) 0.0048(16) -0.0066(17) -0.0131(16)
 C22 0.029(2) 0.0224(19) 0.026(2) -0.0031(17) -0.0085(18) -0.0114(17)
 C23 0.0200(19) 0.0240(19) 0.020(2) -0.0035(16) -0.0030(16) -0.0085(16)
 C24 0.019(2) 0.039(3) 0.034(3) -0.016(2) 0.0046(19) -0.0062(19)
 C25 0.0192(18) 0.0200(18) 0.0155(19) 0.0016(15) -0.0057(15) -0.0079(15)
 C26 0.0119(16) 0.0188(17) 0.0192(19) 0.0029(15) -0.0067(15) -0.0057(13)
 C27 0.0197(19) 0.0198(18) 0.025(2) -0.0031(16) -0.0088(17) -0.0063(15)
 C28 0.0151(18) 0.0246(19) 0.025(2) -0.0025(17) -0.0042(16) -0.0041(15)
 C29 0.0157(18) 0.025(2) 0.032(2) 0.0018(18) -0.0079(17) -0.0079(16)
 C30 0.0186(19) 0.026(2) 0.027(2) -0.0049(17) -0.0081(17) -0.0076(16)
 C31 0.0182(19) 0.027(2) 0.022(2) -0.0035(16) -0.0063(16) -0.0070(16)
 C32 0.019(2) 0.030(2) 0.041(3) -0.017(2) 0.0036(19) -0.0054(17)

_geom_special_details
;
 All esds (except the esd in the dihedral angle between two l.s. planes)
 are estimated using the full covariance matrix.  The cell esds are taken
 into account individually in the estimation of esds in distances, angles
 and torsion angles; correlations between esds in cell parameters are only
 used when they are defined by crystal symmetry.  An approximate (isotropic)
 treatment of cell esds is used for estimating esds involving l.s. planes.
;
loop_
  _geom_bond_atom_site_label_1
  _geom_bond_atom_site_label_2
  _geom_bond_distance
  _geom_bond_site_symmetry_2
  _geom_bond_publ_flag
 Bi1 I1 2.9650(3) . ?
 Bi1 I2 2.8848(3) . ?
 Bi1 I3 3.2832(3) . ?
 Bi1 I4 3.2010(3) . ?
 Bi1 S1 2.8309(11) . ?
 Bi1 S2 2.8733(12) . ?
 Bi2 I3 3.2040(3) . ?
 Bi2 I4 3.2512(3) . ?
 Bi2 I5 2.8941(3) . ?
 Bi2 I6 2.9507(3) . ?
 Bi2 S3 2.8952(11) . ?
 Bi2 S4 2.8290(10) . ?
 S1 C1 1.707(4) . ?
 S2 C9 1.694(4) . ?
 S3 C17 1.695(4) . ?
 S4 C25 1.709(4) . ?
 O00G C25 1.319(5) . ?
 O00G C32 1.451(5) . ?
 O1 C1 1.317(5) . ?
 O1 C8 1.453(5) . ?
 O2 C9 1.314(5) . ?
 O2 C16 1.459(5) . ?
 O3 C17 1.320(5) . ?
 O3 C24 1.453(5) . ?
 N1 C1 1.323(5) . ?
 N1 C2 1.422(5) . ?
 N1 H1 0.80(4) . ?
 N2 C9 1.326(5) . ?
 N2 C10 1.432(5) . ?
 N2 H2 0.78(4) . ?
 N3 C17 1.326(5) . ?
 N3 C18 1.431(5) . ?
 N3 H3 0.83(5) . ?
 N4 C25 1.323(5) . ?
 N4 C26 1.426(5) . ?
 N4 H4 0.78(5) . ?
 C2 C3 1.399(5) . ?
 C2 C7 1.391(5) . ?
 C3 H3A 0.9500 . ?
 C3 C4 1.387(5) . ?
 C4 H4A 0.9500 . ?
 C4 C5 1.388(5) . ?
 C5 H5 0.9500 . ?
 C5 C6 1.392(5) . ?
 C6 H6 0.9500 . ?
 C6 C7 1.388(5) . ?
 C7 H7 0.9500 . ?
 C8 H8A 0.9800 . ?
 C8 H8B 0.9800 . ?
 C8 H8C 0.9800 . ?
 C10 C11 1.386(5) . ?
 C10 C15 1.393(5) . ?
 C11 H11 0.9500 . ?
 C11 C12 1.395(5) . ?
 C12 H12 0.9500 . ?
 C12 C13 1.386(6) . ?
 C13 H13 0.9500 . ?
 C13 C14 1.381(6) . ?
 C14 H14 0.9500 . ?
 C14 C15 1.390(6) . ?
 C15 H15 0.9500 . ?
 C16 H16A 0.9800 . ?
 C16 H16B 0.9800 . ?
 C16 H16C 0.9800 . ?
 C18 C19 1.394(5) . ?
 C18 C23 1.395(5) . ?
 C19 H19 0.9500 . ?
 C19 C20 1.385(5) . ?
 C20 H20 0.9500 . ?
 C20 C21 1.385(6) . ?
 C21 H21 0.9500 . ?
 C21 C22 1.381(6) . ?
 C22 H22 0.9500 . ?
 C22 C23 1.390(5) . ?
 C23 H23 0.9500 . ?
 C24 H24A 0.9800 . ?
 C24 H24B 0.9800 . ?
 C24 H24C 0.9800 . ?
 C26 C27 1.388(5) . ?
 C26 C31 1.394(5) . ?
 C27 H27 0.9500 . ?
 C27 C28 1.387(5) . ?
 C28 H28 0.9500 . ?
 C28 C29 1.395(6) . ?
 C29 H29 0.9500 . ?
 C29 C30 1.385(6) . ?
 C30 H30 0.9500 . ?
 C30 C31 1.390(5) . ?
 C31 H31 0.9500 . ?
 C32 H32A 0.9800 . ?
 C32 H32B 0.9800 . ?
 C32 H32C 0.9800 . ?

loop_
  _geom_angle_atom_site_label_1
  _geom_angle_atom_site_label_2
  _geom_angle_atom_site_label_3
  _geom_angle
  _geom_angle_site_symmetry_1
  _geom_angle_site_symmetry_3
  _geom_angle_publ_flag
 I1 Bi1 I3 88.884(8) . . ?
 I1 Bi1 I4 174.132(9) . . ?
 I2 Bi1 I1 99.236(9) . . ?
 I2 Bi1 I3 171.720(8) . . ?
 I2 Bi1 I4 85.776(9) . . ?
 I4 Bi1 I3 86.031(7) . . ?
 S1 Bi1 I1 91.54(2) . . ?
 S1 Bi1 I2 84.53(2) . . ?
 S1 Bi1 I3 96.95(2) . . ?
 S1 Bi1 I4 91.98(2) . . ?
 S1 Bi1 S2 178.91(3) . . ?
 S2 Bi1 I1 89.05(2) . . ?
 S2 Bi1 I2 96.28(2) . . ?
 S2 Bi1 I3 82.14(2) . . ?
 S2 Bi1 I4 87.36(2) . . ?
 I3 Bi2 I4 86.520(7) . . ?
 I5 Bi2 I3 91.078(8) . . ?
 I5 Bi2 I4 177.237(8) . . ?
 I5 Bi2 I6 95.627(9) . . ?
 I5 Bi2 S3 96.54(2) . . ?
 I6 Bi2 I3 172.009(8) . . ?
 I6 Bi2 I4 86.666(8) . . ?
 S3 Bi2 I3 86.14(2) . . ?
 S3 Bi2 I4 81.94(2) . . ?
 S3 Bi2 I6 88.77(2) . . ?
 S4 Bi2 I3 90.37(2) . . ?
 S4 Bi2 I4 93.42(2) . . ?
 S4 Bi2 I5 87.95(2) . . ?
 S4 Bi2 I6 94.20(2) . . ?
 S4 Bi2 S3 174.35(3) . . ?
 Bi2 I3 Bi1 93.373(8) . . ?
 Bi1 I4 Bi2 94.039(8) . . ?
 C1 S1 Bi1 105.48(14) . . ?
 C9 S2 Bi1 108.54(15) . . ?
 C17 S3 Bi2 110.55(14) . . ?
 C25 S4 Bi2 108.82(14) . . ?
 C25 O00G C32 119.1(3) . . ?
 C1 O1 C8 118.1(3) . . ?
 C9 O2 C16 119.4(3) . . ?
 C17 O3 C24 119.6(3) . . ?
 C1 N1 C2 131.3(3) . . ?
 C1 N1 H1 114(3) . . ?
 C2 N1 H1 114(3) . . ?
 C9 N2 C10 131.5(4) . . ?
 C9 N2 H2 115(3) . . ?
 C10 N2 H2 114(3) . . ?
 C17 N3 C18 131.8(4) . . ?
 C17 N3 H3 115(3) . . ?
 C18 N3 H3 113(3) . . ?
 C25 N4 C26 131.7(3) . . ?
 C25 N4 H4 112(3) . . ?
 C26 N4 H4 117(3) . . ?
 O1 C1 S1 123.1(3) . . ?
 O1 C1 N1 115.3(3) . . ?
 N1 C1 S1 121.6(3) . . ?
 C3 C2 N1 115.9(3) . . ?
 C7 C2 N1 124.1(3) . . ?
 C7 C2 C3 120.0(3) . . ?
 C2 C3 H3A 119.9 . . ?
 C4 C3 C2 120.2(3) . . ?
 C4 C3 H3A 119.9 . . ?
 C3 C4 H4A 120.1 . . ?
 C3 C4 C5 119.8(4) . . ?
 C5 C4 H4A 120.1 . . ?
 C4 C5 H5 120.0 . . ?
 C4 C5 C6 120.0(4) . . ?
 C6 C5 H5 120.0 . . ?
 C5 C6 H6 119.7 . . ?
 C7 C6 C5 120.5(4) . . ?
 C7 C6 H6 119.7 . . ?
 C2 C7 H7 120.2 . . ?
 C6 C7 C2 119.5(4) . . ?
 C6 C7 H7 120.2 . . ?
 O1 C8 H8A 109.5 . . ?
 O1 C8 H8B 109.5 . . ?
 O1 C8 H8C 109.5 . . ?
 H8A C8 H8B 109.5 . . ?
 H8A C8 H8C 109.5 . . ?
 H8B C8 H8C 109.5 . . ?
 O2 C9 S2 123.1(3) . . ?
 O2 C9 N2 114.3(3) . . ?
 N2 C9 S2 122.5(3) . . ?
 C11 C10 N2 116.0(3) . . ?
 C11 C10 C15 120.6(4) . . ?
 C15 C10 N2 123.3(4) . . ?
 C10 C11 H11 119.9 . . ?
 C10 C11 C12 120.1(4) . . ?
 C12 C11 H11 119.9 . . ?
 C11 C12 H12 120.2 . . ?
 C13 C12 C11 119.7(4) . . ?
 C13 C12 H12 120.2 . . ?
 C12 C13 H13 120.2 . . ?
 C14 C13 C12 119.5(4) . . ?
 C14 C13 H13 120.2 . . ?
 C13 C14 H14 119.1 . . ?
 C13 C14 C15 121.8(4) . . ?
 C15 C14 H14 119.1 . . ?
 C10 C15 H15 120.9 . . ?
 C14 C15 C10 118.2(4) . . ?
 C14 C15 H15 120.9 . . ?
 O2 C16 H16A 109.5 . . ?
 O2 C16 H16B 109.5 . . ?
 O2 C16 H16C 109.5 . . ?
 H16A C16 H16B 109.5 . . ?
 H16A C16 H16C 109.5 . . ?
 H16B C16 H16C 109.5 . . ?
 O3 C17 S3 123.0(3) . . ?
 O3 C17 N3 114.3(3) . . ?
 N3 C17 S3 122.7(3) . . ?
 C19 C18 N3 115.6(3) . . ?
 C19 C18 C23 120.4(3) . . ?
 C23 C18 N3 124.0(4) . . ?
 C18 C19 H19 119.8 . . ?
 C20 C19 C18 120.3(4) . . ?
 C20 C19 H19 119.8 . . ?
 C19 C20 H20 120.2 . . ?
 C19 C20 C21 119.6(4) . . ?
 C21 C20 H20 120.2 . . ?
 C20 C21 H21 120.0 . . ?
 C22 C21 C20 120.0(4) . . ?
 C22 C21 H21 120.0 . . ?
 C21 C22 H22 119.3 . . ?
 C21 C22 C23 121.4(4) . . ?
 C23 C22 H22 119.3 . . ?
 C18 C23 H23 120.8 . . ?
 C22 C23 C18 118.4(4) . . ?
 C22 C23 H23 120.8 . . ?
 O3 C24 H24A 109.5 . . ?
 O3 C24 H24B 109.5 . . ?
 O3 C24 H24C 109.5 . . ?
 H24A C24 H24B 109.5 . . ?
 H24A C24 H24C 109.5 . . ?
 H24B C24 H24C 109.5 . . ?
 O00G C25 S4 121.8(3) . . ?
 O00G C25 N4 115.3(3) . . ?
 N4 C25 S4 122.8(3) . . ?
 C27 C26 N4 115.5(3) . . ?
 C27 C26 C31 120.8(3) . . ?
 C31 C26 N4 123.7(4) . . ?
 C26 C27 H27 119.8 . . ?
 C28 C27 C26 120.4(4) . . ?
 C28 C27 H27 119.8 . . ?
 C27 C28 H28 120.4 . . ?
 C27 C28 C29 119.2(4) . . ?
 C29 C28 H28 120.4 . . ?
 C28 C29 H29 119.9 . . ?
 C30 C29 C28 120.2(4) . . ?
 C30 C29 H29 119.9 . . ?
 C29 C30 H30 119.5 . . ?
 C29 C30 C31 121.0(4) . . ?
 C31 C30 H30 119.5 . . ?
 C26 C31 H31 120.8 . . ?
 C30 C31 C26 118.5(4) . . ?
 C30 C31 H31 120.8 . . ?
 O00G C32 H32A 109.5 . . ?
 O00G C32 H32B 109.5 . . ?
 O00G C32 H32C 109.5 . . ?
 H32A C32 H32B 109.5 . . ?
 H32A C32 H32C 109.5 . . ?
 H32B C32 H32C 109.5 . . ?

loop_
  _geom_torsion_atom_site_label_1
  _geom_torsion_atom_site_label_2
  _geom_torsion_atom_site_label_3
  _geom_torsion_atom_site_label_4
  _geom_torsion
  _geom_torsion_site_symmetry_1
  _geom_torsion_site_symmetry_2
  _geom_torsion_site_symmetry_3
  _geom_torsion_site_symmetry_4
  _geom_torsion_publ_flag
 Bi1 S1 C1 O1 136.4(3) . . . . ?
 Bi1 S1 C1 N1 -45.8(3) . . . . ?
 Bi1 S2 C9 O2 -138.5(3) . . . . ?
 Bi1 S2 C9 N2 44.1(4) . . . . ?
 Bi2 S3 C17 O3 147.3(3) . . . . ?
 Bi2 S3 C17 N3 -34.1(4) . . . . ?
 Bi2 S4 C25 O00G -144.4(3) . . . . ?
 Bi2 S4 C25 N4 38.1(4) . . . . ?
 N1 C2 C3 C4 177.9(4) . . . . ?
 N1 C2 C7 C6 -177.9(4) . . . . ?
 N2 C10 C11 C12 -178.0(4) . . . . ?
 N2 C10 C15 C14 178.9(4) . . . . ?
 N3 C18 C19 C20 -177.3(3) . . . . ?
 N3 C18 C23 C22 178.0(4) . . . . ?
 N4 C26 C27 C28 177.8(3) . . . . ?
 N4 C26 C31 C30 -178.1(4) . . . . ?
 C1 N1 C2 C3 157.3(4) . . . . ?
 C1 N1 C2 C7 -24.6(7) . . . . ?
 C2 N1 C1 S1 177.5(3) . . . . ?
 C2 N1 C1 O1 -4.6(6) . . . . ?
 C2 C3 C4 C5 0.1(6) . . . . ?
 C3 C2 C7 C6 0.1(6) . . . . ?
 C3 C4 C5 C6 0.2(6) . . . . ?
 C4 C5 C6 C7 -0.4(6) . . . . ?
 C5 C6 C7 C2 0.2(6) . . . . ?
 C7 C2 C3 C4 -0.3(6) . . . . ?
 C8 O1 C1 S1 0.2(5) . . . . ?
 C8 O1 C1 N1 -177.7(4) . . . . ?
 C9 N2 C10 C11 -163.7(4) . . . . ?
 C9 N2 C10 C15 17.2(7) . . . . ?
 C10 N2 C9 S2 -174.1(3) . . . . ?
 C10 N2 C9 O2 8.3(6) . . . . ?
 C10 C11 C12 C13 -1.2(7) . . . . ?
 C11 C10 C15 C14 -0.1(6) . . . . ?
 C11 C12 C13 C14 0.4(7) . . . . ?
 C12 C13 C14 C15 0.6(7) . . . . ?
 C13 C14 C15 C10 -0.7(7) . . . . ?
 C15 C10 C11 C12 1.1(6) . . . . ?
 C16 O2 C9 S2 4.8(5) . . . . ?
 C16 O2 C9 N2 -177.6(4) . . . . ?
 C17 N3 C18 C19 -166.1(4) . . . . ?
 C17 N3 C18 C23 16.9(7) . . . . ?
 C18 N3 C17 S3 176.9(3) . . . . ?
 C18 N3 C17 O3 -4.5(6) . . . . ?
 C18 C19 C20 C21 -0.6(6) . . . . ?
 C19 C18 C23 C22 1.1(6) . . . . ?
 C19 C20 C21 C22 0.6(6) . . . . ?
 C20 C21 C22 C23 0.3(6) . . . . ?
 C21 C22 C23 C18 -1.1(6) . . . . ?
 C23 C18 C19 C20 -0.3(6) . . . . ?
 C24 O3 C17 S3 -2.4(5) . . . . ?
 C24 O3 C17 N3 178.9(4) . . . . ?
 C25 N4 C26 C27 157.5(4) . . . . ?
 C25 N4 C26 C31 -24.0(6) . . . . ?
 C26 N4 C25 S4 -179.0(3) . . . . ?
 C26 N4 C25 O00G 3.3(6) . . . . ?
 C26 C27 C28 C29 0.5(6) . . . . ?
 C27 C26 C31 C30 0.3(6) . . . . ?
 C27 C28 C29 C30 0.0(6) . . . . ?
 C28 C29 C30 C31 -0.4(6) . . . . ?
 C29 C30 C31 C26 0.2(6) . . . . ?
 C31 C26 C27 C28 -0.7(6) . . . . ?
 C32 O00G C25 S4 -1.3(5) . . . . ?
 C32 O00G C25 N4 176.4(4) . . . . ?

_shelx_res_file
;
TITL mo_b2262_0m_a.res in P-1
    mo_b2262_0m.res
    created by SHELXL-2018/3 at 09:31:17 on 17-Aug-2021
REM Old TITL mo_B2262_0m in P-1
REM SHELXT solution in P-1
REM R1 0.118, Rweak 0.003, Alpha 0.038, Orientation as input
REM Formula found by SHELXT: C34 N8 S4 I6 Bi2
CELL 0.71073 12.8215 13.5748 15.1534 85.829 73.537 68.789
ZERR 2 0.0006 0.0006 0.0008 0.002 0.002 0.002
LATT 1
SFAC C H Bi I N O S
UNIT 64 72 4 12 8 8 8

L.S. 4 0 0
PLAN  20
SIZE 0.073 0.113 0.15
TEMP -173.15
CONF
BOND $H
list 4
MORE -1
fmap 2 53
acta
REM <olex2.extras>
REM <HklSrc "%.\\mo_B2262_0m.hkl">
REM </olex2.extras>

WGHT    0.011000    5.342900
FVAR       0.10964
BI1   3    0.306563    0.105554    0.830413    11.00000    0.01295    0.01674 =
         0.02004    0.00191   -0.00545   -0.00615
BI2   3    0.187913    0.414438    0.663908    11.00000    0.01268    0.01644 =
         0.01771    0.00072   -0.00484   -0.00560
I1    4    0.538830   -0.028565    0.850672    11.00000    0.01485    0.01753 =
         0.02623    0.00026   -0.00790   -0.00407
I2    4    0.173343   -0.020007    0.928163    11.00000    0.02609    0.02756 =
         0.03227    0.01147   -0.01148   -0.01684
I3    4    0.424866    0.267794    0.709077    11.00000    0.01275    0.02000 =
         0.02503    0.00357   -0.00575   -0.00637
I4    4    0.069492    0.257186    0.788731    11.00000    0.01307    0.01963 =
         0.02190    0.00394   -0.00551   -0.00614
I5    4    0.301026    0.552198    0.558214    11.00000    0.02638    0.02504 =
         0.02136    0.00359   -0.00578   -0.01533
I6    4   -0.046968    0.541976    0.647864    11.00000    0.01485    0.01829 =
         0.02422   -0.00038   -0.00808   -0.00353
S1    7    0.244322    0.206785    1.004356    11.00000    0.01652    0.02858 =
         0.02282   -0.00220   -0.00255   -0.01084
S2    7    0.368913    0.006672    0.652266    11.00000    0.02040    0.03916 =
         0.02865   -0.01066    0.00212   -0.01618
S3    7    0.126867    0.517681    0.841531    11.00000    0.01804    0.03715 =
         0.02300   -0.00874    0.00139   -0.01482
S4    7    0.251960    0.294465    0.499405    11.00000    0.01521    0.02422 =
         0.02101   -0.00308   -0.00158   -0.00914
O00G  6    0.189655    0.135419    0.471960    11.00000    0.01559    0.02495 =
         0.03028   -0.01078   -0.00012   -0.00866
O1    6    0.299810    0.372937    1.025821    11.00000    0.01730    0.02836 =
         0.03326   -0.01351    0.00340   -0.00873
O2    6    0.315315   -0.154375    0.616104    11.00000    0.01601    0.02610 =
         0.03470   -0.01086   -0.00321   -0.00418
O3    6    0.185475    0.670195    0.890098    11.00000    0.01518    0.03065 =
         0.02932   -0.01136   -0.00070   -0.00813
N1    5    0.448440    0.232131    0.953482    11.00000    0.01586    0.01749 =
         0.02423   -0.00031   -0.00484   -0.00708
N2    5    0.165246   -0.019378    0.693538    11.00000    0.01637    0.02088 =
         0.02554   -0.00639   -0.00223   -0.00718
N3    5    0.329873    0.546015    0.794663    11.00000    0.01364    0.02087 =
         0.02395   -0.00590   -0.00346   -0.00489
N4    5    0.043509    0.275019    0.549262    11.00000    0.01422    0.01716 =
         0.02011   -0.00279   -0.00391   -0.00540
C1    1    0.335367    0.275443    0.993279    11.00000    0.01641    0.02239 =
         0.01424   -0.00075   -0.00415   -0.00645
C2    1    0.538714    0.274523    0.934004    11.00000    0.01537    0.02179 =
         0.01589    0.00055   -0.00608   -0.00833
C3    1    0.651447    0.200915    0.922917    11.00000    0.01764    0.01891 =
         0.02297    0.00054   -0.00594   -0.00517
AFIX  43
H3A   2    0.663437    0.127903    0.930551    11.00000   -1.20000
AFIX   0
C4    1    0.745768    0.234297    0.900803    11.00000    0.01358    0.02243 =
         0.02631   -0.00329   -0.00536   -0.00346
AFIX  43
H4A   2    0.822281    0.184234    0.893225    11.00000   -1.20000
AFIX   0
C5    1    0.728064    0.341016    0.889778    11.00000    0.01559    0.02708 =
         0.02136   -0.00272   -0.00258   -0.00901
AFIX  43
H5    2    0.792520    0.364065    0.874395    11.00000   -1.20000
AFIX   0
C6    1    0.615800    0.414270    0.901274    11.00000    0.02300    0.01988 =
         0.02282    0.00236   -0.00519   -0.01057
AFIX  43
H6    2    0.603975    0.487294    0.894045    11.00000   -1.20000
AFIX   0
C7    1    0.521013    0.381477    0.923212    11.00000    0.01772    0.02000 =
         0.01963   -0.00152   -0.00588   -0.00416
AFIX  43
H7    2    0.444594    0.431730    0.930802    11.00000   -1.20000
AFIX   0
C8    1    0.177240    0.423811    1.073529    11.00000    0.02184    0.03473 =
         0.05069   -0.01905    0.00726   -0.00769
AFIX 137
H8A   2    0.130171    0.427657    1.031597    11.00000   -1.50000
H8B   2    0.163122    0.495383    1.094267    11.00000   -1.50000
H8C   2    0.155786    0.382694    1.126889    11.00000   -1.50000
AFIX   0
C9    1    0.279132   -0.060062    0.654916    11.00000    0.01935    0.02781 =
         0.01903   -0.00265   -0.00560   -0.00920
C10   1    0.076410   -0.064277    0.709954    11.00000    0.01753    0.02646 =
         0.01814    0.00138   -0.00813   -0.00934
C11   1   -0.037155    0.007009    0.729775    11.00000    0.02199    0.02126 =
         0.02724    0.00033   -0.00536   -0.00816
AFIX  43
H11   2   -0.051942    0.080819    0.729915    11.00000   -1.20000
AFIX   0
C12   1   -0.129780   -0.029417    0.749517    11.00000    0.01958    0.02904 =
         0.03108    0.00322   -0.00528   -0.00852
AFIX  43
H12   2   -0.207678    0.019372    0.764245    11.00000   -1.20000
AFIX   0
C13   1   -0.107553   -0.137182    0.747530    11.00000    0.02387    0.03055 =
         0.02783    0.00582   -0.00902   -0.01547
AFIX  43
H13   2   -0.170064   -0.162691    0.760535    11.00000   -1.20000
AFIX   0
C14   1    0.006084   -0.207162    0.726514    11.00000    0.03209    0.02477 =
         0.03015    0.00321   -0.00995   -0.01457
AFIX  43
H14   2    0.020742   -0.280880    0.724688    11.00000   -1.20000
AFIX   0
C15   1    0.099654   -0.172699    0.707950    11.00000    0.01925    0.02257 =
         0.03107   -0.00236   -0.00637   -0.00575
AFIX  43
H15   2    0.177371   -0.221792    0.694265    11.00000   -1.20000
AFIX   0
C16   1    0.439546   -0.209075    0.574457    11.00000    0.01642    0.02986 =
         0.04304   -0.00966   -0.00150   -0.00177
AFIX 137
H16A  2    0.468288   -0.167002    0.524823    11.00000   -1.50000
H16B  2    0.452363   -0.278308    0.549304    11.00000   -1.50000
H16C  2    0.481419   -0.218651    0.621274    11.00000   -1.50000
AFIX   0
C17   1    0.218343    0.581800    0.841728    11.00000    0.01742    0.02560 =
         0.01765   -0.00181   -0.00363   -0.00909
C18   1    0.419610    0.589034    0.782149    11.00000    0.01548    0.01910 =
         0.01891    0.00236   -0.00545   -0.00594
C19   1    0.520351    0.541395    0.711633    11.00000    0.01818    0.01710 =
         0.02139   -0.00111   -0.00530   -0.00383
AFIX  43
H19   2    0.524475    0.486290    0.674077    11.00000   -1.20000
AFIX   0
C20   1    0.614511    0.574013    0.696040    11.00000    0.01716    0.02541 =
         0.02266    0.00044   -0.00312   -0.00858
AFIX  43
H20   2    0.683409    0.540988    0.648337    11.00000   -1.20000
AFIX   0
C21   1    0.607529    0.655114    0.750475    11.00000    0.02105    0.02295 =
         0.02465    0.00479   -0.00661   -0.01307
AFIX  43
H21   2    0.671486    0.678348    0.739754    11.00000   -1.20000
AFIX   0
C22   1    0.507608    0.702188    0.820321    11.00000    0.02888    0.02244 =
         0.02557   -0.00306   -0.00848   -0.01137
AFIX  43
H22   2    0.503636    0.757930    0.857065    11.00000   -1.20000
AFIX   0
C23   1    0.412699    0.669705    0.837988    11.00000    0.02001    0.02403 =
         0.02025   -0.00351   -0.00298   -0.00851
AFIX  43
H23   2    0.344831    0.701668    0.886880    11.00000   -1.20000
AFIX   0
C24   1    0.064785    0.718547    0.943455    11.00000    0.01866    0.03934 =
         0.03358   -0.01562    0.00463   -0.00624
AFIX 137
H24A  2    0.014032    0.732159    0.902816    11.00000   -1.50000
H24B  2    0.053753    0.785383    0.972041    11.00000   -1.50000
H24C  2    0.045188    0.670702    0.991487    11.00000   -1.50000
AFIX   0
C25   1    0.156190    0.231008    0.508459    11.00000    0.01919    0.02003 =
         0.01549    0.00157   -0.00568   -0.00789
C26   1   -0.049649    0.236260    0.565178    11.00000    0.01190    0.01881 =
         0.01921    0.00289   -0.00666   -0.00568
C27   1   -0.146869    0.286375    0.637053    11.00000    0.01967    0.01977 =
         0.02453   -0.00311   -0.00878   -0.00631
AFIX  43
H27   2   -0.146812    0.340796    0.673048    11.00000   -1.20000
AFIX   0
C28   1   -0.244052    0.257435    0.656591    11.00000    0.01509    0.02460 =
         0.02485   -0.00252   -0.00418   -0.00412
AFIX  43
H28   2   -0.310843    0.292089    0.705443    11.00000   -1.20000
AFIX   0
C29   1   -0.242532    0.176821    0.603636    11.00000    0.01573    0.02550 =
         0.03237    0.00178   -0.00785   -0.00794
AFIX  43
H29   2   -0.308637    0.156363    0.616390    11.00000   -1.20000
AFIX   0
C30   1   -0.144967    0.126525    0.532538    11.00000    0.01860    0.02624 =
         0.02739   -0.00491   -0.00809   -0.00764
AFIX  43
H30   2   -0.144682    0.071411    0.497154    11.00000   -1.20000
AFIX   0
C31   1   -0.047421    0.155440    0.512138    11.00000    0.01820    0.02672 =
         0.02183   -0.00350   -0.00634   -0.00704
AFIX  43
H31   2    0.019255    0.120902    0.463157    11.00000   -1.20000
AFIX   0
C32   1    0.310580    0.083622    0.421051    11.00000    0.01884    0.02973 =
         0.04138   -0.01669    0.00361   -0.00543
AFIX 137
H32A  2    0.331841    0.127318    0.369745    11.00000   -1.50000
H32B  2    0.321315    0.014481    0.397011    11.00000   -1.50000
H32C  2    0.360253    0.074084    0.462013    11.00000   -1.50000
AFIX   0
H1    2    0.469792    0.171408    0.938808    11.00000    0.01570
H4    2    0.027991    0.331477    0.570039    11.00000    0.02470
H3    2    0.352183    0.489200    0.765738    11.00000    0.02523
H2    2    0.142167    0.038991    0.712336    11.00000    0.02357
HKLF 4


REM  mo_b2262_0m_a.res in P-1
REM wR2 = 0.051309, GooF = S = 1.08235, Restrained GooF = 1.08235 for all data
REM R1 = 0.028558 for 12134 Fo > 4sig(Fo) and 0.041013 for all 14441 data
REM 489 parameters refined using 0 restraints

END

WGHT      0.0110      5.3440

REM Highest difference peak  1.481,  deepest hole -1.512,  1-sigma level  0.184
Q1    1   0.4237  0.2218  0.7187  11.00000  0.05    1.48
Q2    1   0.3064  0.0623  0.8384  11.00000  0.05    1.40
Q3    1   0.1965  0.3783  0.6791  11.00000  0.05    1.32
Q4    1   0.2110  0.4009  0.6192  11.00000  0.05    1.19
Q5    1   0.2040 -0.0571  0.9472  11.00000  0.05    1.07
Q6    1   0.2848  0.0612  0.9019  11.00000  0.05    1.07
Q7    1   0.1539  0.3778  0.7399  11.00000  0.05    1.01
Q8    1   0.3416  0.0818  0.7732  11.00000  0.05    1.00
Q9    1   0.2114  0.4559  0.5964  11.00000  0.05    0.98
Q10   1  -0.0733  0.3006  0.4825  11.00000  0.05    0.91
Q11   1   0.3355  0.1435  0.7552  11.00000  0.05    0.89
Q12   1   0.3400  0.4960  0.5749  11.00000  0.05    0.88
Q13   1   0.2749  0.1167  0.8918  11.00000  0.05    0.88
Q14   1   0.3396  0.3418  0.9804  11.00000  0.05    0.84
Q15   1  -0.0418  0.5001  0.5789  11.00000  0.05    0.84
Q16   1   0.3556  0.0187  0.7790  11.00000  0.05    0.84
Q17   1   0.3152  0.5400  0.4837  11.00000  0.05    0.83
Q18   1   0.1642  0.1460  0.5188  11.00000  0.05    0.81
Q19   1   0.2605  0.5052  0.5774  11.00000  0.05    0.81
Q20   1   0.1728  0.0158  0.9959  11.00000  0.05    0.79
;
_shelx_res_checksum                45810
_shelx_hkl_file
;
   1   0   0 5.99898 1.12544  11
  -2   0   0 215.911 12.1632  13
  -2   0   0 225.907 7.32949   2
  -2   0   0 227.627 7.39278  12
  -2   0   0 216.678 5.88193   7
  -2   0   0 205.025 6.21148   4
  -2   0   0 214.484 10.3146   1
  -2   0   0 204.923 5.43861   6
  -2   0   0 212.295 6.72831  11
   2   0   0 210.245 5.46310   6
   2   0   0 199.428 6.13817   4
   2   0   0 210.604 5.55159   7
   2   0   0 207.879 6.54446   9
  -3   0   0 15.7048 1.23370   7
  -3   0   0 14.4781 2.08877   2
  -3   0   0 13.1148 1.70942   9
  -3   0   0 14.9111 1.15211   6
  -3   0   0 13.2981 3.45773   1
  -3   0   0 16.5727 1.88434  11
  -3   0   0 15.2494 1.61956   4
  -3   0   0 10.9183 3.42646  13
  -3   0   0 12.2573 1.94332  12
   3   0   0 13.4008 1.49217   4
   3   0   0 11.7344 1.59608   9
   3   0   0 16.8737 2.48346   2
   3   0   0 15.2877 1.23498   7
   3   0   0 9.78185 3.14936   1
   3   0   0 15.2042 2.81978  12
   3   0   0 13.9507 1.84163  11
  -4   0   0 32.8384 3.34944   2
  -4   0   0 36.5962 2.01736   6
  -4   0   0 34.5584 2.99476   9
  -4   0   0 33.8829 7.47244  13
  -4   0   0 35.2659 3.04080  11
  -4   0   0 28.5210 6.11616   1
  -4   0   0 32.6803 2.63071   4
  -4   0   0 36.4293 2.08325   7
  -4   0   0 34.7186 3.61311  12
   4   0   0 35.0316 3.18439  11
   4   0   0 33.1465 5.36755   1
   4   0   0 25.8590 4.47998  12
   4   0   0 35.6513 2.95883   9
   4   0   0 33.9480 2.63958   4
   4   0   0 33.7283 2.06849   7
  -5   0   0 27.1889 6.33950   1
  -5   0   0 19.3172 6.93752  13
  -5   0   0 27.7714 2.78329   4
  -5   0   0 30.1913 3.36435   2
  -5   0   0 29.3065 1.97559   6
  -5   0   0 28.5192 3.08356   9
  -5   0   0 29.8415 2.10013   7
  -5   0   0 20.7700 3.62411  12
   5   0   0 22.3217 4.63056  12
   5   0   0 26.8145 2.15482   7
   5   0   0 26.2849 2.62800   4
   5   0   0 24.5952 6.05196   1
   5   0   0 30.5897 3.41942  11
  -6   0   0 111.254 6.73148  11
  -6   0   0 115.414 4.69644   7
  -6   0   0 115.156 4.54343   6
  -6   0   0 106.447 6.55852   9
  -6   0   0 103.207 14.1320  13
  -6   0   0 121.692 12.1385   1
  -6   0   0 113.154 7.08462   2
  -6   0   0 105.446 5.99630   4
   6   0   0 110.211 5.83154   4
   6   0   0 115.437 5.98257   3
   6   0   0 120.478 7.24902  11
   6   0   0 114.317 4.99154   7
   6   0   0 100.103 11.5155   1
   6   0   0 102.844 6.32306   9
  -7   0   0 45.5018 3.03354   7
  -7   0   0 45.7284 4.23448   4
  -7   0   0 55.4724 5.40508   2
  -7   0   0 44.9664 4.63252   9
  -7   0   0 29.4967 7.80957   1
  -7   0   0 39.2510 10.4913  13
  -7   0   0 49.3754 3.01632   6
  -7   0   0 46.7971 4.66122  11
   7   0   0 54.0112 5.41239  11
   7   0   0 45.4046 4.11022   4
   7   0   0 42.1651 9.43847   1
   7   0   0 44.5093 4.52407   9
   7   0   0 54.3786 4.36460   3
   7   0   0 48.9875 3.47419   7
  -8   0   0 2075.96 54.7052   2
  -8   0   0 2016.00 72.7591   1
  -8   0   0 2121.73 48.3025   6
  -8   0   0 2070.14 54.3801  11
  -8   0   0 2063.71 52.3770   4
  -8   0   0 2078.95 54.0947   9
  -8   0   0 2091.92 48.5855   7
   8   0   0 2040.67 51.9686   4
   8   0   0 2014.81 72.5554   1
   8   0   0 2082.28 55.2895  11
   8   0   0 2135.41 52.3902   3
   8   0   0 2096.59 49.7727   7
  -9   0   0 188.954 10.7935  11
  -9   0   0 173.939 10.5494   2
  -9   0   0 179.725 6.97999   6
  -9   0   0 178.159 10.5403   9
  -9   0   0 175.135 18.5710   1
  -9   0   0 180.991 9.69424   4
   9   0   0 165.525 9.08286   4
   9   0   0 191.963 9.94516   3
   9   0   0 188.554 8.30318   7
   9   0   0 171.200 11.1412  11
 -10   0   0 20.5540 5.16311  10
 -10   0   0 14.7493 5.00116  11
 -10   0   0 17.2922 4.17308   2
 -10   0   0 21.9919 4.28221   4
 -10   0   0 13.8362 7.66252   1
 -10   0   0 18.6119 4.26767   9
 -10   0   0 25.4814 2.71858   6
  10   0   0 21.2364 3.36412   7
  10   0   0 13.2974 4.18344  11
  10   0   0 27.0973 5.14716   3
  10   0   0 24.1665 9.42522   1
 -11   0   0 -0.2660 1.79012   4
 -11   0   0 0.82493 2.38504   9
 -11   0   0 0.90830 2.45551   2
 -11   0   0 0.15204 1.18365   6
  11   0   0 0.82545 2.52574   4
  11   0   0 -0.1331 1.59172   7
  11   0   0 0.33111 2.12926   3
  11   0   0 -0.4940 2.23383  11
 -12   0   0 19.3344 4.94284   2
 -12   0   0 20.6857 4.43180   4
 -12   0   0 21.2021 5.25816   9
 -12   0   0 20.1696 2.95222   6
  12   0   0 22.8486 5.51148   3
 -13   0   0 3.12972 3.39877   9
 -13   0   0 6.99146 2.01622   6
 -13   0   0 10.2641 4.19639   2
 -13   0   0 10.7462 3.57293   4
  13   0   0 13.1514 4.80831   3
 -14   0   0 89.7511 8.81604   4
 -14   0   0 76.2221 9.20306   9
 -14   0   0 76.3678 9.48395   5
  14   0   0 64.9567 9.26220   3
 -15   0   0 10.0106 4.08471   4
 -15   0   0 14.5644 5.40457   5
 -15   0   0 13.9649 5.42664   9
  15   0   0 11.0967 5.90658   3
 -16   0   0 192.054 15.7078   5
 -16   0   0 184.819 13.3743   4
 -16   0   0 174.291 15.0350   9
  16   0   0 187.820 14.8267   3
  16  -1   0 22.3691 6.07636   3
 -16   1   0 25.2222 6.97919   9
 -16   1   0 27.6820 5.82164   4
 -16   1   0 32.6766 8.04043   5
  15  -1   0 52.3431 8.12962   3
 -15   1   0 42.7396 8.83300   5
 -15   1   0 53.6207 9.73759   9
 -15   1   0 47.9661 8.05832   4
  14  -1   0 5.36283 4.92673   3
 -14   1   0 3.01703 3.83755   5
 -14   1   0 7.56939 4.03867   9
 -14   1   0 10.3540 3.91502   4
  13  -1   0 240.783 14.5616   3
 -13   1   0 180.264 15.3436   5
 -13   1   0 233.405 13.3294   4
 -13   1   0 217.969 21.6905   9
  12  -1   0 4.76593 3.44017   3
 -12   1   0 -2.4612 2.19103   9
 -12   1   0 2.38929 2.44579   4
 -12   1   0 12.4577 3.68681   2
  11  -1   0 2.79189 3.00255   3
  11  -1   0 -1.0303 2.21656   4
 -11   1   0 -0.1233 2.03504   4
 -11   1   0 -0.9425 3.46442   2
 -11   1   0 -0.3050 2.52550   9
  10  -1   0 13.6489 8.04333   1
  10  -1   0 27.0403 5.31299   3
 -10   1   0 17.0655 3.78607   4
 -10   1   0 21.7875 2.24612   6
 -10   1   0 24.5437 4.79608   9
 -10   1   0 20.2122 7.64087   1
 -10   1   0 17.7287 4.85786   2
   9  -1   0 48.0058 3.52333   7
   9  -1   0 44.6997 5.03145   4
   9  -1   0 56.5478 12.9680   1
   9  -1   0 51.3814 6.40887  11
   9  -1   0 49.2634 5.87910   3
  -9   1   0 60.8137 6.41609   9
  -9   1   0 55.7120 3.18284   6
  -9   1   0 41.2865 10.4779   1
  -9   1   0 51.3286 5.17112   4
  -9   1   0 45.2926 6.22522   2
  -9   1   0 52.0905 6.04751  11
   8  -1   0 27.1148 5.17175  11
   8  -1   0 25.9225 8.59217   1
   8  -1   0 23.4072 2.76387   7
   8  -1   0 27.2612 3.66478   4
   8  -1   0 25.8582 4.79568   3
  -8   1   0 28.6557 5.18844   2
  -8   1   0 30.5951 2.31238   6
  -8   1   0 34.0991 2.49862   7
  -8   1   0 20.9509 4.02676  11
  -8   1   0 23.2298 7.92470   1
  -8   1   0 28.6346 4.37373   9
  -8   1   0 26.8429 3.78839   4
   7  -1   0 302.022 12.5274   3
   7  -1   0 312.280 10.1236   7
   7  -1   0 309.436 21.3323   1
   7  -1   0 294.766 11.4313   4
   7  -1   0 313.830 13.7826  11
  -7   1   0 295.408 8.94914   7
  -7   1   0 294.648 20.7874   1
  -7   1   0 308.792 8.78756   6
  -7   1   0 317.502 14.7510   2
  -7   1   0 306.098 13.1951  11
  -7   1   0 288.024 12.6924   9
  -7   1   0 306.582 11.7809   4
   6  -1   0 65.2618 4.40939   4
   6  -1   0 67.9479 5.61118  11
   6  -1   0 73.2583 5.11970   3
   6  -1   0 66.4435 3.84880   7
   6  -1   0 64.0395 5.01702   9
   6  -1   0 58.8132 8.42062   1
  -6   1   0 65.9798 4.53689   4
  -6   1   0 62.1434 5.06405   9
  -6   1   0 66.1549 3.11051   7
  -6   1   0 63.5334 5.99587   2
  -6   1   0 64.2069 5.15966  11
  -6   1   0 68.7148 2.98118   6
  -6   1   0 45.1647 10.1493  13
  -6   1   0 60.9630 8.67689   1
   5  -1   0 7.22414 1.96608   9
   5  -1   0 9.56575 2.56221  11
   5  -1   0 8.08428 3.42667   1
   5  -1   0 8.55629 1.80126   4
   5  -1   0 11.0679 1.65095   7
  -5   1   0 10.4275 2.40530  11
  -5   1   0 8.66323 1.15830   7
  -5   1   0 7.76762 4.37197  13
  -5   1   0 11.4478 3.28506   2
  -5   1   0 9.73088 1.06477   6
  -5   1   0 7.66751 3.41090   1
  -5   1   0 11.7926 2.40665   9
  -5   1   0 7.60960 1.77663   4
   4  -1   0 5.51273 1.33053   4
   4  -1   0 6.17625 1.32575   7
   4  -1   0 8.87175 3.44977   1
   4  -1   0 6.31441 1.71100   3
   4  -1   0 5.44149 1.41475   9
   4  -1   0 7.15783 1.83315  11
  -4   1   0 4.00887 1.37777   9
  -4   1   0 5.38541 0.90604   7
  -4   1   0 7.33251 1.13645   8
  -4   1   0 4.99654 1.27471   4
  -4   1   0 2.56230 2.39534   1
  -4   1   0 0.85678 2.54756  13
  -4   1   0 3.33231 1.95527   2
  -4   1   0 5.28623 0.79054   6
  -4   1   0 5.64492 1.78908  11
   3  -1   0 68.2634 4.08706  11
   3  -1   0 62.7449 3.14781   4
   3  -1   0 62.5111 3.59457   9
   3  -1   0 65.7102 2.83323   7
   3  -1   0 57.1494 5.82779   1
   3  -1   0 64.3120 3.72920   3
  -3   1   0 64.4027 2.41360   7
  -3   1   0 64.9948 5.96656   1
  -3   1   0 65.5649 2.56231   8
  -3   1   0 73.4777 8.46556  13
  -3   1   0 61.6393 3.82339  11
  -3   1   0 68.1312 3.28944   4
  -3   1   0 62.7819 3.64897   9
  -3   1   0 58.9989 2.36553   6
   2  -1   0 0.31722 0.85181   1
   2  -1   0 0.41633 0.93056  12
   2  -1   0 0.14561 0.75033   3
   2  -1   0 0.57238 0.61184  11
   2  -1   0 -0.2888 0.30913   4
   2  -1   0 0.08218 0.41734   9
  -2   1   0 1.01729 0.87678   1
  -2   1   0 1.16516 1.68231  13
  -2   1   0 0.51885 0.52663  11
  -2   1   0 0.11135 0.78807   7
  -2   1   0 0.51921 0.54991   3
  -2   1   0 -1.1160 0.94178  12
  -2   1   0 0.27402 0.39993   4
  -2   1   0 -0.4905 0.41319   9
   1  -1   0 48.3647 1.82003   4
   1  -1   0 56.1118 3.54733   1
   1  -1   0 54.4691 2.33560   3
   1  -1   0 51.8175 3.44908  12
  -1   1   0 49.7107 2.11168   4
  -1   1   0 49.9936 2.17358   9
  -1   1   0 54.8148 3.77837  12
  -1   1   0 54.4437 3.54348  12
  -1   1   0 56.2866 4.75112  13
  -1  -1   0 1125.04 27.5415   6
  -1  -1   0 1064.40 29.0004   7
   1   1   0 1290.16 28.5112  10
   1   1   0 1303.48 27.1711  11
  -2  -1   0 1.66083 1.38357   1
  -2  -1   0 1.74884 0.71286  10
  -2  -1   0 3.71198 1.37013  12
  -2  -1   0 4.16483 0.84154   9
  -2  -1   0 3.23241 0.62825   6
  -2  -1   0 2.00804 1.44931  13
  -2  -1   0 5.43614 1.01707   2
  -2  -1   0 2.69574 0.66228   7
  -2  -1   0 3.95469 0.90700   4
   2   1   0 3.53474 1.08866  10
   2   1   0 2.80758 1.44445   1
   2   1   0 3.62694 0.71067   7
   2   1   0 3.10682 0.69597   9
   2   1   0 2.30298 0.54575   6
   2   1   0 3.29001 0.85058   2
   2   1   0 2.73944 0.80802  11
   2   1   0 3.41136 1.56856  12
  -3  -1   0 219.392 13.2261   1
  -3  -1   0 235.763 11.5746  12
  -3  -1   0 256.239 14.5226  13
  -3  -1   0 223.932 6.66916   6
  -3  -1   0 221.157 7.59425   2
  -3  -1   0 248.776 8.68206  10
  -3  -1   0 225.083 7.45490   4
  -3  -1   0 219.012 7.52019   9
  -3  -1   0 226.212 7.74709  11
  -3  -1   0 227.982 6.87056   7
   3   1   0 230.461 11.2588  12
   3   1   0 231.441 7.97060   2
   3   1   0 229.396 6.67578   6
   3   1   0 223.633 7.53882   9
   3   1   0 229.962 13.3076   1
   3   1   0 224.034 7.40391   4
   3   1   0 225.822 7.79408  11
   3   1   0 228.467 5.99242   8
   3   1   0 229.457 6.84266   7
  -4  -1   0 6.62845 3.57753  13
  -4  -1   0 8.44843 1.67100   4
  -4  -1   0 7.25373 1.19202   6
  -4  -1   0 6.69823 1.24823   7
  -4  -1   0 4.99026 1.85164  10
  -4  -1   0 5.56420 2.31152   1
  -4  -1   0 7.71222 1.56542   9
  -4  -1   0 7.15978 1.60712  11
  -4  -1   0 7.38518 1.67807   2
  -4  -1   0 9.30448 3.00278  12
   4   1   0 8.41596 2.12816   2
   4   1   0 2.56559 2.06020  12
   4   1   0 7.33212 3.14559   1
   4   1   0 6.75334 1.14878   6
   4   1   0 7.24265 1.82804  11
   4   1   0 7.14087 1.26510   7
   4   1   0 7.48888 1.54161   9
   4   1   0 7.14684 1.43339   4
   4   1   0 6.84458 0.84133   8
  -5  -1   0 689.553 24.8169  12
  -5  -1   0 659.529 30.2624   1
  -5  -1   0 677.145 17.3455   7
  -5  -1   0 644.606 19.1477   2
  -5  -1   0 646.110 19.1830   9
  -5  -1   0 664.291 33.0050  13
  -5  -1   0 652.876 18.6830   4
  -5  -1   0 651.176 19.3760  11
  -5  -1   0 667.248 17.0102   6
   5   1   0 643.606 19.0517   9
   5   1   0 676.997 20.8900   2
   5   1   0 663.610 17.1941   7
   5   1   0 656.888 19.6642  11
   5   1   0 639.153 23.6182  12
   5   1   0 651.995 18.5360   4
   5   1   0 667.386 30.2235   1
  -6  -1   0 8.13468 3.98745   1
  -6  -1   0 18.6420 3.88001  10
  -6  -1   0 17.7122 3.20557   2
  -6  -1   0 19.4498 2.99773   9
  -6  -1   0 17.7772 3.04349  11
  -6  -1   0 15.8535 4.29335  12
  -6  -1   0 17.1963 1.94694   6
  -6  -1   0 18.4597 2.06957   7
  -6  -1   0 13.9066 2.63702   4
  -6  -1   0 14.2065 5.96185  13
   6   1   0 18.0237 2.53272   4
   6   1   0 15.0256 2.75874   9
   6   1   0 16.5496 2.96757  11
   6   1   0 15.5665 3.96048  12
   6   1   0 7.20697 4.05786   1
   6   1   0 15.5528 2.04802   7
   6   1   0 28.1574 4.87351   2
  -7  -1   0 2.71013 2.73536   1
  -7  -1   0 0.73848 1.20439   4
  -7  -1   0 2.24237 1.39127  11
  -7  -1   0 2.34264 1.05053   6
  -7  -1   0 0.21827 1.44925  10
  -7  -1   0 -0.2017 1.07269   9
  -7  -1   0 1.31048 1.01162   7
  -7  -1   0 -5.7409 4.11389  12
  -7  -1   0 3.89256 2.51603   2
  -7  -1   0 2.76785 4.86663  13
   7   1   0 -5.4670 3.68115  12
   7   1   0 1.85794 1.40666   9
   7   1   0 2.39841 1.40881   4
   7   1   0 4.54308 2.17214   2
   7   1   0 0.56250 1.07851   7
   7   1   0 1.94079 2.76724   1
   7   1   0 1.35886 1.57121  11
  -8  -1   0 3.55512 1.66873  11
  -8  -1   0 -2.9982 1.72058  10
  -8  -1   0 1.95356 1.78191   4
  -8  -1   0 2.36010 4.82569   1
  -8  -1   0 4.50959 1.53605   6
  -8  -1   0 6.80984 2.62342   9
  -8  -1   0 1.01899 1.45178   2
   8   1   0 1.43881 1.35832   7
   8   1   0 -0.3879 3.79905   1
   8   1   0 4.65747 2.24794  11
   8   1   0 1.38355 1.46366   4
  -9  -1   0 571.931 19.7246   4
  -9  -1   0 550.379 34.8913   1
  -9  -1   0 587.915 16.4259   6
  -9  -1   0 528.949 23.6530  11
  -9  -1   0 562.276 20.5686   9
  -9  -1   0 529.616 19.8515   2
  -9  -1   0 515.386 22.0381  10
   9   1   0 568.044 21.6440  11
   9   1   0 565.986 19.3403   4
   9   1   0 575.851 35.4573   1
   9   1   0 555.919 16.9478   7
 -10  -1   0 8.82643 3.45848  11
 -10  -1   0 14.3736 4.00703   9
 -10  -1   0 16.4045 3.67621   4
 -10  -1   0 3.08292 9.93915   1
 -10  -1   0 16.7556 3.88242   2
 -10  -1   0 15.7551 2.65373   6
 -10  -1   0 14.2359 3.80882  10
  10   1   0 17.1372 3.96015   3
  10   1   0 10.4033 3.46214  11
  10   1   0 21.0081 3.41995   7
  10   1   0 14.6287 4.32956   4
  10   1   0 17.6282 7.90851   1
 -11  -1   0 113.302 6.04118   6
 -11  -1   0 110.317 8.49054   4
 -11  -1   0 105.630 8.08009   2
 -11  -1   0 101.645 8.68543   9
  11   1   0 107.458 9.65891  11
  11   1   0 111.304 7.20260   7
  11   1   0 120.260 13.5605   3
  11   1   0 94.4908 7.72708   4
 -12  -1   0 12.3374 6.55534   2
 -12  -1   0 19.9992 3.08031   6
 -12  -1   0 18.3128 4.74703   9
 -12  -1   0 13.8829 4.03499   4
  12   1   0 13.9232 4.00309   3
  12   1   0 11.2967 4.04042  11
 -13  -1   0 303.565 17.0723   9
 -13  -1   0 311.488 11.4140   6
 -13  -1   0 323.613 16.0535   4
 -13  -1   0 254.173 14.7672   2
  13   1   0 316.857 18.6280  11
  13   1   0 305.058 16.3322   3
 -14  -1   0 2.57992 1.86474   6
 -14  -1   0 2.89450 2.78192   9
 -14  -1   0 5.01395 2.97453   4
  14   1   0 -0.2534 3.42244   3
 -15  -1   0 -3.2685 2.75208   4
 -15  -1   0 -4.2662 2.99271   9
 -15  -1   0 -0.1768 1.98430   6
  15   1   0 10.3062 5.14025   3
 -16  -1   0 6.84007 4.34385   5
 -16  -1   0 2.24930 4.20882   9
 -16  -1   0 4.57827 2.91895   4
  16   1   0 3.59466 5.26029   3
  15  -2   0 0.12307 3.85371   3
 -15   2   0 2.74124 3.55326   4
 -15   2   0 1.68890 3.57995   5
 -15   2   0 0.59301 3.41661   9
  14  -2   0 5.22344 3.87801   3
 -14   2   0 2.54302 3.38364   4
 -14   2   0 2.38393 3.77753   5
 -14   2   0 -0.0278 2.95338   9
  13  -2   0 -5.9704 2.98577   3
 -13   2   0 -3.3192 2.85979   5
 -13   2   0 4.36745 3.21115   9
 -13   2   0 5.43769 2.93910   4
  12  -2   0 872.062 29.3892   3
 -12   2   0 828.424 28.4219   4
 -12   2   0 842.442 31.9184   5
 -12   2   0 857.525 31.6915   9
 -12   2   0 769.544 30.9558   2
  11  -2   0 179.823 11.6287   3
  11  -2   0 155.574 9.83924   4
 -11   2   0 180.620 12.2979   9
 -11   2   0 166.389 12.1726   5
 -11   2   0 140.776 14.4340   2
 -11   2   0 183.934 10.7428   4
  10  -2   0 144.221 10.3854   4
  10  -2   0 169.932 11.0282   3
 -10   2   0 172.766 12.2865   2
 -10   2   0 173.106 11.3652   9
 -10   2   0 183.077 9.98187   4
   9  -2   0 91.3801 7.71295   3
   9  -2   0 63.6552 13.1611   1
   9  -2   0 66.9075 5.86342   4
  -9   2   0 68.8252 6.93828  11
  -9   2   0 82.0206 7.37830   9
  -9   2   0 60.5475 12.2751   1
  -9   2   0 81.1441 6.14892   4
  -9   2   0 93.8958 8.97548   2
   8  -2   0 122.753 8.55302   3
   8  -2   0 87.4825 13.3392   1
   8  -2   0 115.295 6.91860   4
  -8   2   0 123.152 8.44666   9
  -8   2   0 110.902 8.17994  11
  -8   2   0 105.809 12.6968   1
  -8   2   0 117.018 9.68132   2
  -8   2   0 116.265 7.09072   4
   7  -2   0 8.30502 4.31723   1
   7  -2   0 6.18045 2.01222   4
   7  -2   0 6.25189 2.60972   3
  -7   2   0 8.84591 4.40199   1
  -7   2   0 6.76376 2.25004  11
  -7   2   0 7.12135 2.11178   4
  -7   2   0 6.28838 3.46759   2
  -7   2   0 5.71212 2.37513   9
   6  -2   0 20.2141 3.97525   3
   6  -2   0 12.1223 5.60637   1
   6  -2   0 14.2132 2.53075   4
  -6   2   0 17.8696 3.46746  11
  -6   2   0 15.2517 4.68945   1
  -6   2   0 10.9258 7.16755  13
  -6   2   0 16.4758 4.59811   2
  -6   2   0 13.9289 2.82163   9
  -6   2   0 18.0034 2.52792   4
  -6   2   0 20.0182 2.08491   8
   5  -2   0 1.93231 2.95893   1
   5  -2   0 12.4150 2.19460   4
   5  -2   0 7.74643 2.44935   3
   5  -2   0 8.33362 2.09383   9
  -5   2   0 9.60279 1.43437   8
  -5   2   0 9.77972 4.59473  13
  -5   2   0 8.18233 2.07688   9
  -5   2   0 10.3924 1.94115   4
  -5   2   0 3.32530 2.92173   1
  -5   2   0 6.69881 2.90957   2
  -5   2   0 9.73250 2.42071  11
   4  -2   0 406.231 13.2335   9
   4  -2   0 388.946 14.2801  12
   4  -2   0 413.842 12.0570   4
   4  -2   0 406.364 13.7544   3
   4  -2   0 409.329 18.8245   1
  -4   2   0 400.039 12.0017   4
  -4   2   0 425.883 18.7019   1
  -4   2   0 429.435 11.3318   8
  -4   2   0 423.347 13.8987  11
  -4   2   0 414.866 24.9955  13
  -4   2   0 408.905 13.2947   9
  -4   2   0 392.474 17.0958  12
  -4   2   0 420.571 10.5694   7
  -4   2   0 417.056 15.1184  12
   3  -2   0 307.245 14.1314   1
   3  -2   0 293.197 8.79137   4
   3  -2   0 294.418 9.77667   9
   3  -2   0 291.932 9.96939   3
  -3   2   0 283.792 8.70248   7
  -3   2   0 315.079 10.0005   3
  -3   2   0 302.725 13.6401   1
  -3   2   0 305.657 10.3788  11
  -3   2   0 305.861 13.2124  12
  -3   2   0 293.211 8.78498   4
  -3   2   0 309.835 9.99034   9
   2  -2   0 1711.62 39.6153   4
   2  -2   0 1713.61 40.5919   9
   2  -2   0 1744.98 40.4592   3
  -2   2   0 1832.55 44.7886   1
  -2   2   0 1811.69 46.9181  12
  -2   2   0 1774.86 41.2631   5
  -2   2   0 1727.37 41.3283  11
  -2   2   0 1623.51 41.6304   3
  -2   2   0 1943.93 54.1612  13
  -2   2   0 1724.83 40.6312   9
  -2   2   0 1719.77 39.5669   4
   1  -2   0 23.4694 1.26622   6
   1  -2   0 20.9575 2.59726   1
   1  -2   0 22.5606 1.49524   9
   1  -2   0 23.2505 1.75420   5
   1  -2   0 23.1911 4.01147  12
   1  -2   0 22.7615 1.56218   3
  -1   2   0 18.3239 3.03955   1
  -1   2   0 23.8231 1.03833   6
  -1   2   0 23.7434 3.53608  12
  -1   2   0 22.6846 1.25006   4
  -1   2   0 24.5084 3.88898  13
  -1   2   0 24.7092 1.83026   5
  -1   2   0 22.8400 1.62050   3
  -1   2   0 23.7935 1.53643   9
   0  -2   0 430.717 14.0176  13
   0  -2   0 407.701 11.0941  10
   0  -2   0 393.287 9.80416   6
   0  -2   0 416.076 18.0667  12
   0  -2   0 394.601 10.2768   3
   0  -2   0 404.891 10.2040   5
   0  -2   0 389.722 12.6153   1
   0   2   0 405.293 11.0563  10
   0   2   0 411.131 10.4111   5
   0   2   0 400.700 9.80622   6
   0   2   0 384.746 10.2173   3
   0   2   0 402.259 9.23958   9
   0   2   0 417.167 16.9971  12
  -1  -2   0 2.18452 0.37322   9
  -1  -2   0 1.95428 0.53104   6
  -1  -2   0 3.18417 0.66046   4
  -1  -2   0 2.52444 0.63932   5
  -1  -2   0 -0.6199 1.34626  12
   1   2   0 1.16158 1.11136   1
   1   2   0 1.67841 0.60168   5
   1   2   0 1.87935 0.50711   9
   1   2   0 1.79283 1.58418  12
   1   2   0 2.79870 0.87665  10
   1   2   0 1.96576 0.66095   2
   1   2   0 1.80123 0.51070   4
   1   2   0 2.11781 0.54468  11
  -2  -2   0 155.327 5.42669   2
  -2  -2   0 161.820 8.98036  13
  -2  -2   0 156.215 4.86352   9
  -2  -2   0 148.134 10.0553   1
  -2  -2   0 144.940 11.8685  12
  -2  -2   0 150.123 5.29197   4
  -2  -2   0 156.262 5.76389  10
  -2  -2   0 154.413 5.16492  11
   2   2   0 153.535 10.2006   1
   2   2   0 152.565 5.04626   6
   2   2   0 161.555 5.45862   7
   2   2   0 154.748 5.83778  10
   2   2   0 156.843 5.53989   2
   2   2   0 153.892 5.19848  11
   2   2   0 150.972 4.81945   9
   2   2   0 148.527 11.5944  12
   2   2   0 154.803 5.25519   4
  -3  -2   0 0.31039 0.65883  11
  -3  -2   0 -0.9876 1.28205   1
  -3  -2   0 0.04137 0.53801   2
  -3  -2   0 -1.3503 1.89923  13
  -3  -2   0 -0.1024 0.51878   7
  -3  -2   0 1.18308 0.83216  10
  -3  -2   0 1.35038 0.66896   6
  -3  -2   0 0.82758 0.70485   4
  -3  -2   0 1.27741 1.82795  12
  -3  -2   0 1.04079 0.65460   9
   3   2   0 -0.4494 1.18537   1
   3   2   0 0.55573 0.51471   6
   3   2   0 0.41920 0.79104  10
   3   2   0 0.14275 0.53129   9
   3   2   0 0.40309 1.72107  12
   3   2   0 0.90852 0.68417   7
   3   2   0 1.02643 0.67402   4
   3   2   0 0.82277 0.68463  11
   3   2   0 0.61385 0.69882   2
  -4  -2   0 585.163 15.4494   6
  -4  -2   0 593.781 27.2267   1
  -4  -2   0 607.546 25.6352  12
  -4  -2   0 589.908 15.8848   7
  -4  -2   0 585.109 16.3829   9
  -4  -2   0 591.413 16.4893   4
  -4  -2   0 564.029 16.4720  11
  -4  -2   0 567.500 16.3416   2
  -4  -2   0 567.809 17.5235  10
  -4  -2   0 604.717 27.0834  13
   4   2   0 579.669 24.5007  12
   4   2   0 584.901 16.7242  11
   4   2   0 596.779 15.4482   6
   4   2   0 590.492 16.8698   2
   4   2   0 590.139 15.7208   7
   4   2   0 582.517 17.9713  10
   4   2   0 553.550 16.1122   9
   4   2   0 587.582 14.5499   8
   4   2   0 575.521 16.3044   4
  -5  -2   0 -1.3796 1.02424  10
  -5  -2   0 -0.9004 1.44628   1
  -5  -2   0 1.20836 0.85778   6
  -5  -2   0 2.00545 1.13255   4
  -5  -2   0 1.32381 1.03390   9
  -5  -2   0 2.13149 1.16943   2
  -5  -2   0 4.21721 3.78837  13
  -5  -2   0 1.35185 3.10703  12
  -5  -2   0 1.08675 0.89964   7
  -5  -2   0 1.28532 1.22243  11
   5   2   0 0.49860 0.82271   7
   5   2   0 0.99376 0.81961   9
   5   2   0 1.82629 0.74236   8
   5   2   0 -0.3770 0.85325  11
   5   2   0 1.50936 2.81456   1
   5   2   0 2.85044 2.64126  12
   5   2   0 1.42273 0.99016   4
   5   2   0 0.55826 0.67290   6
   5   2   0 1.16524 1.15234   2
  -6  -2   0 4158.35 96.2873  11
  -6  -2   0 4012.36 97.8944  10
  -6  -2   0 4085.05 95.8634   9
  -6  -2   0 4197.95 130.757   1
  -6  -2   0 4249.65 121.134  13
  -6  -2   0 4002.90 95.4734   2
  -6  -2   0 4320.87 110.372  12
  -6  -2   0 4237.82 94.0005   7
  -6  -2   0 4138.93 95.6005   4
  -6  -2   0 4131.47 93.3218   6
   6   2   0 4144.83 108.075  12
   6   2   0 4226.74 117.413   1
   6   2   0 4142.74 91.4443   8
   6   2   0 4090.16 95.7575   9
   6   2   0 4134.73 93.6398   7
   6   2   0 4169.51 97.6005   2
   6   2   0 4132.65 95.2900   4
   6   2   0 4142.20 96.6077  11
  -7  -2   0 15.5974 4.99129   1
  -7  -2   0 17.9053 3.27030   4
  -7  -2   0 14.3615 2.90192  11
  -7  -2   0 14.6796 2.96398   9
  -7  -2   0 18.7543 6.11961  12
  -7  -2   0 15.4929 2.35253   7
  -7  -2   0 6.55463 3.76098   2
  -7  -2   0 17.7564 2.25153   6
  -7  -2   0 11.9967 2.98264  10
   7   2   0 16.3605 3.24495  11
   7   2   0 22.0224 2.53820   7
   7   2   0 22.8063 2.95681   4
   7   2   0 11.3041 4.67473  12
   7   2   0 18.2321 4.14213   2
   7   2   0 25.2296 8.48549   1
   7   2   0 18.5214 3.52793   9
  -8  -2   0 64.7457 5.95359   9
  -8  -2   0 67.9565 11.2273   1
  -8  -2   0 62.9478 6.37313  10
  -8  -2   0 69.5554 5.86101  11
  -8  -2   0 64.4288 5.30727   2
  -8  -2   0 68.5495 4.38918   6
  -8  -2   0 73.5794 5.72798   4
   8   2   0 66.6651 13.6654   1
   8   2   0 66.7932 4.48338   7
   8   2   0 65.9810 6.87037   2
   8   2   0 63.7346 7.37986  11
   8   2   0 65.2703 5.18641   4
  -9  -2   0 26.7163 3.02575   6
  -9  -2   0 23.4143 4.17501  11
  -9  -2   0 18.0999 7.69421   1
  -9  -2   0 26.9405 3.90941   2
  -9  -2   0 23.9266 4.35257   9
  -9  -2   0 23.0326 4.12878   4
  -9  -2   0 21.7964 5.09685  10
   9   2   0 19.5641 3.78358   4
   9   2   0 25.4806 4.18645   7
   9   2   0 31.7829 6.58803   2
   9   2   0 28.4598 5.39315  11
   9   2   0 27.0225 9.19189   1
 -10  -2   0 10.7819 3.64332  10
 -10  -2   0 7.78546 2.04100   6
 -10  -2   0 5.26016 2.62118   2
 -10  -2   0 4.09096 2.53817   4
 -10  -2   0 6.55220 2.82396  11
 -10  -2   0 10.8285 8.34067   1
 -10  -2   0 9.39503 3.19909   9
  10   2   0 5.83576 6.13260   1
  10   2   0 9.12890 2.72315   4
  10   2   0 9.65747 2.57676   7
  10   2   0 6.00900 2.94457  11
 -11  -2   0 9.22322 3.49853   9
 -11  -2   0 2.41093 2.33185   4
 -11  -2   0 5.19794 2.60393   2
 -11  -2   0 7.84259 2.23673   6
  11   2   0 8.39971 3.46360  11
  11   2   0 6.49168 2.81736   4
  11   2   0 5.40016 2.48299   7
 -12  -2   0 14.5732 4.46051   9
 -12  -2   0 12.8124 4.12132   2
 -12  -2   0 21.3726 3.45366   6
 -12  -2   0 15.0774 4.20938   4
  12   2   0 15.1485 5.25112  11
  12   2   0 17.6658 3.59470   7
  12   2   0 20.9256 4.52658   3
 -13  -2   0 29.2317 6.12004   9
 -13  -2   0 29.8479 4.88547   6
 -13  -2   0 27.2884 5.54432   2
 -13  -2   0 33.9879 6.12478   4
  13   2   0 23.7595 5.33953   3
  13   2   0 28.3531 6.59949  11
  13   2   0 26.9430 4.80060   7
 -14  -2   0 748.490 30.3601   9
 -14  -2   0 787.880 29.3471   4
 -14  -2   0 758.108 22.7826   6
  14   2   0 721.110 24.3680   7
  14   2   0 766.334 28.5569   3
  14   2   0 767.712 32.3891  11
 -15  -2   0 23.7563 3.99777   6
 -15  -2   0 25.3364 6.10991   4
 -15  -2   0 19.9989 5.79981   9
  15   2   0 21.0499 6.21755   3
 -16  -2   0 2.56982 2.76728   4
 -16  -2   0 11.9405 5.10466   9
 -16  -2   0 8.92217 2.61584   6
  16   2   0 4.90111 4.83473   3
  15  -3   0 72.8484 8.45599   3
 -15   3   0 79.1495 8.49672   4
 -15   3   0 81.3230 11.2936   5
 -15   3   0 79.9435 9.78045   9
  14  -3   0 -6.9439 3.35891   3
 -14   3   0 2.81252 3.77821   9
 -14   3   0 -2.2297 3.47482   5
 -14   3   0 0.94719 3.02630   4
  13  -3   0 3.22147 3.22832   3
 -13   3   0 7.31044 3.47703   4
 -13   3   0 1.93880 3.37194   9
 -13   3   0 8.62335 4.34005   5
  12  -3   0 46.8841 6.36084   3
 -12   3   0 47.8247 7.20930   9
 -12   3   0 46.0919 5.90069   4
 -12   3   0 33.8757 7.18935   5
  11  -3   0 796.486 26.5838   4
  11  -3   0 868.709 27.2828   3
 -11   3   0 745.971 31.4305   2
 -11   3   0 809.460 30.4589   5
 -11   3   0 833.017 27.2261   4
 -11   3   0 832.812 30.3244   9
  10  -3   0 87.1830 7.02841   3
  10  -3   0 74.9736 6.59855   4
 -10   3   0 58.0717 7.43314   5
 -10   3   0 80.2683 6.54224   4
 -10   3   0 64.5933 9.38733   2
 -10   3   0 63.1441 7.34593   9
   9  -3   0 14.0558 3.90561   3
   9  -3   0 14.3967 3.42903   4
  -9   3   0 14.0292 3.99203   9
  -9   3   0 13.0037 5.38918   2
  -9   3   0 14.8011 4.36936  11
  -9   3   0 9.36621 3.39930   5
  -9   3   0 12.8331 3.13021   4
  -9   3   0 10.1166 6.43108   1
   8  -3   0 3.26138 1.79462   4
   8  -3   0 -0.5017 4.00368   1
   8  -3   0 2.63678 1.92262   3
  -8   3   0 2.00212 2.12522   9
  -8   3   0 -1.2240 1.92695  11
  -8   3   0 0.82630 1.29779   4
  -8   3   0 3.67854 3.74777   1
  -8   3   0 2.22398 3.22061   2
  -8   3   0 3.18300 2.23338   5
   7  -3   0 455.535 16.4067   3
   7  -3   0 454.072 15.0575   4
   7  -3   0 434.472 25.1292   1
  -7   3   0 409.894 23.9195   1
  -7   3   0 456.981 15.1677   4
  -7   3   0 457.074 17.6639   5
  -7   3   0 464.092 13.6830   8
  -7   3   0 462.245 21.7147   2
  -7   3   0 448.841 17.4222   9
  -7   3   0 434.272 17.3420  11
   6  -3   0 19.2981 3.56277   3
   6  -3   0 18.6081 3.41460   4
   6  -3   0 23.3441 6.41256   1
  -6   3   0 10.8246 4.18092   1
  -6   3   0 20.9920 2.72780   4
  -6   3   0 16.4250 3.62214   5
  -6   3   0 23.2674 2.39592   8
  -6   3   0 20.3286 3.60782  11
  -6   3   0 16.5852 3.17109   9
   5  -3   0 35.7586 3.60029   3
   5  -3   0 30.0253 2.86660   4
   5  -3   0 40.0401 6.60172   1
  -5   3   0 30.6246 3.60539  11
  -5   3   0 29.5226 2.46890   8
  -5   3   0 18.9426 7.53236  13
  -5   3   0 34.4341 3.87588   5
  -5   3   0 37.9675 5.84138   1
  -5   3   0 34.9846 2.94575   4
  -5   3   0 29.1838 3.47439   9
   4  -3   0 43.0147 6.18795   1
   4  -3   0 38.7400 2.85705   4
   4  -3   0 39.9958 3.44460   9
   4  -3   0 43.8672 3.40387   3
  -4   3   0 41.2091 2.88475   4
  -4   3   0 34.0443 8.91038  13
  -4   3   0 45.7672 3.77349   3
  -4   3   0 41.1141 3.91396   5
  -4   3   0 47.9123 5.75545   1
  -4   3   0 38.1600 3.50187   9
  -4   3   0 36.7293 5.69202  12
  -4   3   0 41.8902 3.99977  11
  -4   3   0 38.1440 2.73513   7
   3  -3   0 1451.86 35.6967   9
   3  -3   0 1476.32 35.2218   3
   3  -3   0 1462.70 46.2110   1
  -3   3   0 1467.72 35.8425   9
  -3   3   0 1433.22 34.1728   4
  -3   3   0 1483.96 34.1444   7
  -3   3   0 1498.54 36.8908  11
  -3   3   0 1516.23 36.8048   5
  -3   3   0 1509.53 41.0827   1
  -3   3   0 1395.33 37.1414   3
  -3   3   0 1462.13 48.8387  12
  -3   3   0 1407.81 64.9742  13
   2  -3   0 153.190 5.76673   9
   2  -3   0 160.646 9.73776   1
   2  -3   0 152.545 5.68251   3
  -2   3   0 166.447 9.79065   1
  -2   3   0 161.998 6.55973   5
  -2   3   0 179.715 12.6685  13
  -2   3   0 153.368 10.8037  12
  -2   3   0 149.626 4.98389   4
  -2   3   0 153.639 5.80981   9
  -2   3   0 155.424 6.28791   3
   1  -3   0 20.7530 1.77587   3
   1  -3   0 19.7592 1.49822   9
   1  -3   0 22.5061 1.30838   6
   1  -3   0 22.0011 1.91321   5
   1  -3   0 20.3080 4.79859  12
   1  -3   0 20.5564 2.83173   1
  -1   3   0 20.0927 1.78532   3
  -1   3   0 23.7773 2.05721   5
  -1   3   0 21.3381 4.29682  12
  -1   3   0 26.1221 4.33074  13
  -1   3   0 26.0175 3.05081  10
  -1   3   0 20.7160 1.54420   9
  -1   3   0 25.1975 3.71035   1
  -1   3   0 22.4332 1.29962   6
   0  -3   0 24.9000 5.25007  12
   0  -3   0 29.3512 2.57220  10
   0  -3   0 25.1553 1.93174   3
   0  -3   0 27.2235 1.66933   6
   0  -3   0 27.9897 1.88229   5
   0  -3   0 24.3195 2.95964   1
   0   3   0 28.4029 2.10807   5
   0   3   0 29.1973 3.30627   1
   0   3   0 25.3974 1.21676   9
   0   3   0 29.3535 5.05621  12
   0   3   0 26.8954 2.46702  10
   0   3   0 25.9397 1.92951   3
   0   3   0 25.7087 1.62140   6
  -1  -3   0 520.132 13.6271   5
  -1  -3   0 522.515 14.1063   2
  -1  -3   0 507.484 13.9944  10
  -1  -3   0 523.156 13.2518   6
  -1  -3   0 525.509 13.2227   4
  -1  -3   0 518.023 24.8850  12
   1   3   0 517.845 14.1701  10
   1   3   0 510.567 14.0966   2
   1   3   0 521.913 23.8480  12
   1   3   0 522.307 13.6632   5
   1   3   0 516.454 13.0416   4
   1   3   0 519.607 19.8932   1
   1   3   0 494.026 13.1031   6
  -2  -3   0 8.93367 1.64730  10
  -2  -3   0 8.74058 0.93207   9
  -2  -3   0 8.65429 1.24961  11
  -2  -3   0 9.55483 3.29928   1
  -2  -3   0 7.44311 2.39866  13
  -2  -3   0 8.40144 3.33943  12
  -2  -3   0 10.8912 1.43474   5
  -2  -3   0 8.65215 1.23044   6
  -2  -3   0 8.71022 1.53099   2
  -2  -3   0 9.89285 1.36312   4
   2   3   0 7.69271 3.29236  12
   2   3   0 8.65069 3.01191   1
   2   3   0 9.94135 1.31814   4
   2   3   0 8.71069 1.20011   6
   2   3   0 9.84311 0.97204   9
   2   3   0 8.24719 1.63631  10
   2   3   0 10.7270 1.86349   2
   2   3   0 11.4221 1.56229   7
   2   3   0 8.99851 1.41670  11
  -3  -3   0 141.932 5.54688  11
  -3  -3   0 135.156 5.04223   9
  -3  -3   0 140.776 12.5906  12
  -3  -3   0 136.710 6.19705  10
  -3  -3   0 131.583 11.3742   1
  -3  -3   0 138.255 10.1003  13
  -3  -3   0 133.517 5.62351   4
  -3  -3   0 132.160 5.71302   2
   3   3   0 137.605 6.33064  10
   3   3   0 135.387 5.89685   2
   3   3   0 137.381 5.54639  11
   3   3   0 142.508 5.83959   7
   3   3   0 137.647 5.05666   9
   3   3   0 142.836 11.8625  12
   3   3   0 138.079 11.4985   1
   3   3   0 133.801 5.28022   6
   3   3   0 133.315 5.51467   4
  -4  -3   0 0.77207 0.86404  10
  -4  -3   0 0.26616 0.60748   6
  -4  -3   0 -1.2107 2.81500  12
  -4  -3   0 1.27138 2.04438   1
  -4  -3   0 0.45506 0.71075   2
  -4  -3   0 -0.6749 0.51769   4
  -4  -3   0 0.73323 2.31458  13
  -4  -3   0 -0.0167 0.58824   9
  -4  -3   0 0.58003 0.68764  11
   4   3   0 0.42989 0.71382  11
   4   3   0 0.36474 0.65937   2
   4   3   0 -0.4443 0.48047   6
   4   3   0 1.47568 2.52840  12
   4   3   0 0.97401 0.84675   7
   4   3   0 0.61085 0.85323  10
   4   3   0 1.50326 2.20210   1
   4   3   0 0.50976 0.59979   4
   4   3   0 -0.5435 0.53675   9
  -5  -3   0 784.717 22.0286   2
  -5  -3   0 790.923 22.1054   4
  -5  -3   0 832.821 37.0033   1
  -5  -3   0 783.180 22.0371  11
  -5  -3   0 778.390 20.7768   6
  -5  -3   0 772.271 23.2787  10
  -5  -3   0 748.062 34.8350  13
  -5  -3   0 807.681 35.6475  12
  -5  -3   0 764.533 21.5147   9
   5   3   0 835.181 36.6228   1
   5   3   0 786.709 22.2377  11
   5   3   0 788.679 20.7895   6
   5   3   0 788.850 23.9135  10
   5   3   0 814.859 34.0118  12
   5   3   0 795.282 21.3127   7
   5   3   0 797.887 22.5401   2
   5   3   0 776.098 21.8114   4
   5   3   0 785.680 21.5972   9
  -6  -3   0 13.0564 2.56504  11
  -6  -3   0 13.3973 2.83638  10
  -6  -3   0 8.38002 5.68807  12
  -6  -3   0 12.8952 4.79575  13
  -6  -3   0 13.8526 2.66624   4
  -6  -3   0 8.22661 2.22195   2
  -6  -3   0 12.3678 4.91376   1
  -6  -3   0 11.8659 2.18344   6
  -6  -3   0 11.3292 2.54015   9
   6   3   0 13.6141 2.38386   7
   6   3   0 8.14658 4.08076   1
   6   3   0 9.93372 2.30718   9
   6   3   0 12.1707 2.43550   4
   6   3   0 16.8378 3.57207   2
   6   3   0 14.0949 1.70737   8
   6   3   0 14.1189 1.97210   6
   6   3   0 13.5904 2.89036  11
  -7  -3   0 693.343 21.3324  11
  -7  -3   0 618.367 36.5548  13
  -7  -3   0 658.029 20.8585   4
  -7  -3   0 658.763 22.6699  10
  -7  -3   0 648.005 32.4963  12
  -7  -3   0 664.320 20.7590   9
  -7  -3   0 681.496 36.7748   1
  -7  -3   0 651.422 18.8133   6
  -7  -3   0 659.532 21.1447   2
   7   3   0 652.029 20.4624   4
   7   3   0 695.961 22.2964   2
   7   3   0 686.128 17.2975   8
   7   3   0 676.380 20.8738   9
   7   3   0 666.813 21.5638  11
   7   3   0 667.812 36.2283   1
   7   3   0 654.634 31.2284  12
   7   3   0 672.654 19.3341   7
  -8  -3   0 12.9249 2.34389   6
  -8  -3   0 15.4374 3.30748  11
  -8  -3   0 12.9143 2.87337   9
  -8  -3   0 16.1523 3.29894   4
  -8  -3   0 14.8297 6.86234   1
  -8  -3   0 11.7356 2.95344  10
  -8  -3   0 14.1194 3.00469   2
   8   3   0 15.1556 6.77942   1
   8   3   0 11.3113 2.42600   7
   8   3   0 17.2140 1.84434   8
   8   3   0 12.1207 3.16996  11
   8   3   0 12.7027 2.77764   4
   8   3   0 6.80782 2.81698   2
  -9  -3   0 9.83986 2.21812   6
  -9  -3   0 12.3174 3.31402  10
  -9  -3   0 6.33111 2.49315   9
  -9  -3   0 11.8358 3.02592  11
  -9  -3   0 6.27401 5.92868   1
  -9  -3   0 9.51991 2.91390   2
  -9  -3   0 9.16367 3.05496   4
   9   3   0 11.5230 3.35155  11
   9   3   0 12.1788 3.90535   2
   9   3   0 14.4284 3.17523   4
   9   3   0 9.55367 5.79543   1
   9   3   0 13.0004 2.54321   7
 -10  -3   0 6.20161 7.15567   1
 -10  -3   0 4.81579 2.42432   9
 -10  -3   0 2.67503 2.25458  11
 -10  -3   0 3.41316 2.28807   4
 -10  -3   0 4.43941 2.53679  10
 -10  -3   0 6.34685 2.08687   6
 -10  -3   0 5.81681 2.36071   2
  10   3   0 11.4655 7.89603   1
  10   3   0 4.60868 2.72079  11
  10   3   0 10.6951 4.33161   2
  10   3   0 6.20929 2.46807   4
  10   3   0 12.6825 2.78656   7
 -11  -3   0 13.8364 9.10323   1
 -11  -3   0 13.6212 4.07383   9
 -11  -3   0 8.45235 2.56242   6
 -11  -3   0 7.36097 3.34173   2
 -11  -3   0 8.52622 3.35207   4
  11   3   0 8.57731 2.78096   7
  11   3   0 3.01098 3.00576   4
  11   3   0 13.3278 8.30804   1
  11   3   0 8.32337 4.32749   2
  11   3   0 10.5399 3.78517  11
 -12  -3   0 12.9524 3.82662   2
 -12  -3   0 9.56641 3.34299   4
 -12  -3   0 13.2423 2.97666   6
 -12  -3   0 8.35169 3.40724   9
  12   3   0 19.8803 3.50390   7
 -13  -3   0 2.71040 2.79929   4
 -13  -3   0 6.87708 4.15888   2
 -13  -3   0 5.86091 3.26418   9
 -13  -3   0 11.4199 3.00473   6
  13   3   0 11.0234 4.56080  11
  13   3   0 5.70924 2.98905   3
 -14  -3   0 8.66769 3.55953   4
  14   3   0 -2.1070 2.64565   3
  14   3   0 0.27335 3.07556   7
 -15  -3   0 351.764 18.7553   4
 -15  -3   0 330.939 19.3394   9
 -15  -3   0 359.991 14.1840   6
  15   3   0 342.039 17.9494   3
  15   3   0 343.610 20.7768  11
  15   3   0 337.026 15.4041   7
 -16  -3   0 4.22155 4.11005   9
 -16  -3   0 11.1115 4.57763   4
 -16  -3   0 11.7595 3.27448   6
  16   3   0 9.37472 5.95421   3
 -17  -3   0 6.71488 3.86095   4
 -17  -3   0 4.54380 3.08553   6
  17   3   0 2.56966 5.60833   3
  14  -4   0 147.047 9.42595   3
 -14   4   0 147.293 13.9470   5
 -14   4   0 134.192 12.2728   9
 -14   4   0 164.713 11.4257   4
  13  -4   0 8.85682 3.75547   3
 -13   4   0 13.5348 4.22430   4
 -13   4   0 12.8391 4.77942   9
 -13   4   0 19.7382 6.10290   5
  12  -4   0 17.0375 4.43276   3
 -12   4   0 26.9342 5.01667   4
 -12   4   0 23.1362 5.84578   5
 -12   4   0 31.5402 6.85665   9
  11  -4   0 24.2788 4.83873   3
 -11   4   0 14.6137 4.87392   9
 -11   4   0 19.0834 7.82424   2
 -11   4   0 14.2195 4.71364   5
 -11   4   0 20.6576 4.50771   4
  10  -4   0 128.357 8.20092   3
 -10   4   0 130.002 10.5654   5
 -10   4   0 123.148 9.86228   9
 -10   4   0 134.216 12.6887   2
 -10   4   0 116.067 8.06965   4
   9  -4   0 13.6390 3.11265   4
   9  -4   0 22.0297 4.04509   3
  -9   4   0 8.56425 3.31832   4
  -9   4   0 15.7826 5.23427   2
  -9   4   0 18.7816 4.94451   5
  -9   4   0 10.3978 3.54273   9
   8  -4   0 18.8740 3.39049   4
   8  -4   0 24.5191 4.30556   3
   8  -4   0 16.2949 7.68896   1
  -8   4   0 18.8715 4.15759  11
  -8   4   0 16.9745 3.83685   9
  -8   4   0 22.8448 3.35602   8
  -8   4   0 15.0666 4.00757   5
  -8   4   0 15.4852 5.62169   1
  -8   4   0 27.4336 3.64104   4
  -8   4   0 13.6421 5.91715   2
   7  -4   0 61.3398 4.69058   4
   7  -4   0 66.4342 5.33069   3
   7  -4   0 75.8273 14.4217   1
  -7   4   0 63.5057 4.27565   8
  -7   4   0 52.5693 8.01646   1
  -7   4   0 57.3690 4.62303   4
  -7   4   0 68.5201 6.68954   5
  -7   4   0 58.3466 5.86970  11
  -7   4   0 65.7834 8.54601   2
  -7   4   0 58.1040 5.74319   9
   6  -4   0 1742.81 60.5507   1
   6  -4   0 1808.27 44.3799   3
  -6   4   0 1775.37 54.7272   1
  -6   4   0 1712.09 57.8230   5
  -6   4   0 1761.05 43.3280   4
  -6   4   0 1749.24 47.0264  11
  -6   4   0 1767.03 42.7898   8
  -6   4   0 1809.84 46.2657   9
   5  -4   0 110.673 5.94324   3
   5  -4   0 96.7658 12.0871   1
  -5   4   0 122.259 7.53296   5
  -5   4   0 108.559 9.32034   1
  -5   4   0 99.1123 6.69090  11
  -5   4   0 107.418 5.30647   4
  -5   4   0 106.955 6.11188   3
  -5   4   0 105.179 6.48279   9
  -5   4   0 83.7203 13.6878  13
   4  -4   0 237.164 17.1600   1
   4  -4   0 253.180 9.12989   3
  -4   4   0 262.278 13.3567   1
  -4   4   0 252.024 10.7260   3
  -4   4   0 240.376 8.56723   7
  -4   4   0 259.302 9.98072   9
  -4   4   0 252.391 8.37657   4
  -4   4   0 242.070 20.4812  13
  -4   4   0 261.830 10.7948   5
  -4   4   0 257.150 10.7909  11
  -4   4   0 244.097 16.0067  12
   3  -4   0 60.0076 6.83941   1
   3  -4   0 69.6035 3.95787   3
  -3   4   0 67.8370 5.93795   1
  -3   4   0 73.2186 3.46143   4
  -3   4   0 67.5972 10.0208  13
  -3   4   0 69.9872 4.79652   5
  -3   4   0 70.7312 4.25708   9
  -3   4   0 64.0925 4.88832   3
  -3   4   0 68.4833 4.74625  11
  -3   4   0 63.5332 8.66979  12
   2  -4   0 10.8463 1.85740   3
   2  -4   0 6.75467 2.22977   1
   2  -4   0 9.51721 0.99007   6
  -2   4   0 8.41693 4.75374  13
  -2   4   0 8.24116 0.88383   6
  -2   4   0 9.32379 3.33171  12
  -2   4   0 11.7116 3.36690   1
  -2   4   0 8.72250 1.24961   4
  -2   4   0 10.7629 2.23740   5
  -2   4   0 8.83567 1.55008   9
  -2   4   0 11.8320 1.82628   3
   1  -4   0 58.4384 4.78572   1
   1  -4   0 50.4418 3.23801   5
   1  -4   0 68.1739 8.72599  12
   1  -4   0 56.1306 3.24652   3
   1  -4   0 57.3054 2.56775   6
  -1   4   0 55.4349 2.49528   6
  -1   4   0 52.7449 3.45657   5
  -1   4   0 54.2583 3.26859   3
  -1   4   0 54.7354 4.54447  10
  -1   4   0 49.6364 6.79785  13
  -1   4   0 57.8397 2.75272   9
  -1   4   0 52.8176 7.59702  12
  -1   4   0 54.8795 5.73356   1
   0  -4   0 756.576 18.7882   6
   0  -4   0 773.244 35.0727  12
   0  -4   0 750.633 21.1607  10
   0  -4   0 753.205 19.6973   3
   0  -4   0 785.230 19.5438   5
   0   4   0 768.858 18.6113   4
   0   4   0 788.864 24.7440   1
   0   4   0 770.447 20.1752   5
   0   4   0 801.831 33.4443  12
   0   4   0 742.443 19.6391   3
   0   4   0 756.374 18.7204   6
   0   4   0 774.069 21.2864  10
  -1  -4   0 2.71635 0.94064   5
  -1  -4   0 -0.2398 2.47849  12
  -1  -4   0 1.93351 0.78421   4
  -1  -4   0 2.09272 0.79747   6
  -1  -4   0 2.14779 1.06651  10
   1   4   0 2.93627 1.20456  10
   1   4   0 2.97694 1.08958   2
   1   4   0 3.15847 2.77841  12
   1   4   0 0.55615 1.27468   1
   1   4   0 2.23157 0.97112   3
   1   4   0 2.29658 1.00522   5
   1   4   0 2.12983 0.82468   6
   1   4   0 1.98248 0.78130   4
   1   4   0 1.89708 1.62083   1
  -2  -4   0 4858.97 110.460  10
  -2  -4   0 4977.85 107.250   9
  -2  -4   0 4933.06 110.382   2
  -2  -4   0 4974.57 133.710  12
  -2  -4   0 5070.75 116.713  13
  -2  -4   0 4837.89 109.290   6
  -2  -4   0 4941.95 109.613   5
  -2  -4   0 4903.75 109.374   4
   2   4   0 5029.67 109.734   5
   2   4   0 4936.65 109.163  11
   2   4   0 4912.93 109.175   4
   2   4   0 4881.47 123.469   1
   2   4   0 5021.25 131.228  12
   2   4   0 4810.84 110.503   2
   2   4   0 4864.82 110.438   7
   2   4   0 4914.85 110.861  10
   2   4   0 4906.76 109.243   6
  -3  -4   0 182.553 7.08977   5
  -3  -4   0 169.441 6.60060   6
  -3  -4   0 177.755 6.61389  11
  -3  -4   0 182.140 14.1262   1
  -3  -4   0 170.962 7.13904   2
  -3  -4   0 176.513 5.76868   9
  -3  -4   0 174.428 10.9098  13
  -3  -4   0 174.596 6.83629   4
  -3  -4   0 159.804 15.2742  12
  -3  -4   0 177.148 7.54719  10
   3   4   0 185.093 7.80831  10
   3   4   0 174.123 6.62036  11
   3   4   0 170.342 6.55085   6
   3   4   0 165.631 5.65626   9
   3   4   0 173.132 7.33831   2
   3   4   0 178.900 13.9472   1
   3   4   0 167.605 6.59731   4
   3   4   0 176.039 7.24579   7
   3   4   0 175.991 14.9028  12
  -4  -4   0 623.559 18.7166  10
  -4  -4   0 600.900 17.2202  11
  -4  -4   0 628.867 33.7824  12
  -4  -4   0 643.334 26.7623  13
  -4  -4   0 599.210 16.4808   9
  -4  -4   0 603.190 17.7833   2
  -4  -4   0 629.484 30.5043   1
  -4  -4   0 603.861 17.6720   4
   4   4   0 638.965 30.5227   1
   4   4   0 616.688 17.4845   4
   4   4   0 606.843 17.4312  11
   4   4   0 610.462 17.7546   7
   4   4   0 617.123 19.0118  10
   4   4   0 622.102 18.2672   2
   4   4   0 601.380 16.9260   6
   4   4   0 604.071 16.4525   9
   4   4   0 614.694 32.6514  12
  -5  -4   0 2.62020 2.87874   1
  -5  -4   0 -0.3569 0.60282   9
  -5  -4   0 6.25116 4.60489  12
  -5  -4   0 4.85992 3.02139  13
  -5  -4   0 2.53381 1.17999  11
  -5  -4   0 1.17145 0.94292   4
  -5  -4   0 0.31074 0.73874   6
   5   4   0 -1.0228 3.22223  12
   5   4   0 0.33120 0.70513   9
   5   4   0 0.37879 0.89948  11
   5   4   0 -0.3971 0.59593   6
   5   4   0 1.77392 2.23064   1
   5   4   0 -0.3174 1.04435  10
   5   4   0 -0.2354 0.77703   7
  -6  -4   0 211.332 10.2974  10
  -6  -4   0 210.876 9.42333   4
  -6  -4   0 207.743 9.09259  11
  -6  -4   0 212.170 18.8130   1
  -6  -4   0 213.063 17.2560  13
  -6  -4   0 210.038 9.28130   2
  -6  -4   0 203.327 8.73991   9
  -6  -4   0 208.894 8.36158   6
   6   4   0 225.524 9.67385  11
   6   4   0 207.509 8.98769   9
   6   4   0 199.860 10.0971   7
   6   4   0 158.441 21.1818  12
   6   4   0 210.334 10.7630  10
   6   4   0 207.278 18.6486   1
   6   4   0 213.707 9.71896   2
   6   4   0 211.327 9.13828   4
   6   4   0 213.397 8.40231   6
  -7  -4   0 9.24502 5.77046   1
  -7  -4   0 8.23015 2.30706   2
  -7  -4   0 8.63207 2.58373   4
  -7  -4   0 12.2557 6.02909  13
  -7  -4   0 14.0087 6.89809  12
  -7  -4   0 8.67980 2.26125   9
  -7  -4   0 12.6778 2.74151  11
  -7  -4   0 12.1429 2.95163  10
  -7  -4   0 9.54185 2.16293   6
   7   4   0 9.51345 2.90847   2
   7   4   0 8.62923 1.85012   6
   7   4   0 10.7126 2.36570   9
   7   4   0 11.3665 5.42998   1
   7   4   0 9.32967 2.32001   4
   7   4   0 7.27372 2.38575  11
   7   4   0 11.8130 6.07615  12
   7   4   0 8.28610 2.11448   7
   7   4   0 11.3162 2.00254   8
  -8  -4   0 22.2585 3.81600   4
  -8  -4   0 27.3080 3.19485   6
  -8  -4   0 29.0555 3.78520  11
  -8  -4   0 24.5937 5.06075  10
  -8  -4   0 28.3954 9.39501   1
  -8  -4   0 24.1962 3.59327   2
  -8  -4   0 27.6216 3.72379   9
   8   4   0 31.5710 4.26670  11
   8   4   0 22.0847 7.74981   1
   8   4   0 31.7461 4.38782   2
   8   4   0 27.4846 2.57825   8
   8   4   0 27.4518 3.33560   7
   8   4   0 26.4323 3.66410   4
  -9  -4   0 5.80000 2.31787   9
  -9  -4   0 6.64452 2.71337  10
  -9  -4   0 7.76198 2.20596   2
  -9  -4   0 5.20507 4.86076   1
  -9  -4   0 7.62651 2.12499   6
  -9  -4   0 4.74548 2.22797  11
  -9  -4   0 5.47883 2.25370   4
   9   4   0 5.00734 2.94494   2
   9   4   0 7.03289 2.30257   7
   9   4   0 9.02443 5.59519   1
   9   4   0 4.18951 2.09082   4
   9   4   0 4.92950 1.62642   8
   9   4   0 6.53189 2.73487  11
 -10  -4   0 1341.37 65.4660   1
 -10  -4   0 1310.81 42.6508  10
 -10  -4   0 1377.80 39.4180   2
 -10  -4   0 1407.77 40.3308   9
 -10  -4   0 1390.09 40.4489   4
 -10  -4   0 1452.11 37.2446   6
 -10  -4   0 1378.56 40.7462  11
  10   4   0 1459.48 43.7199   2
  10   4   0 1425.71 65.8601   1
  10   4   0 1376.85 39.6288   4
  10   4   0 1461.01 42.0115  11
  10   4   0 1410.20 33.9167   8
  10   4   0 1427.02 37.6775   7
 -11  -4   0 5.51235 2.94175   4
 -11  -4   0 -8.7541 6.85865   1
 -11  -4   0 3.00065 2.41454   2
 -11  -4   0 3.33643 2.52728   9
 -11  -4   0 1.20380 1.72525   6
  11   4   0 1.79117 2.82191   2
  11   4   0 0.74768 2.32586  11
  11   4   0 -0.7764 1.82923   7
 -12  -4   0 347.394 16.8422   4
 -12  -4   0 323.413 13.4108   6
 -12  -4   0 333.084 16.6948   9
 -12  -4   0 309.623 18.0010   2
  12   4   0 348.204 19.8552   2
  12   4   0 335.667 17.6172  11
  12   4   0 349.458 14.0162   7
 -13  -4   0 21.6757 5.43982   9
 -13  -4   0 15.3647 3.43948   6
 -13  -4   0 10.8727 3.96059   4
 -13  -4   0 14.9722 3.96013   2
  13   4   0 15.4295 4.97699  11
  13   4   0 9.84188 5.08589   2
  13   4   0 11.9966 3.48164   7
 -14  -4   0 44.1698 5.11777   6
 -14  -4   0 38.4035 6.95971   4
 -14  -4   0 39.5603 7.34328   9
  14   4   0 46.6569 6.22112   7
  14   4   0 37.5786 7.95642  11
 -15  -4   0 7.24337 2.86921   6
 -15  -4   0 -1.0338 2.62059   4
 -15  -4   0 7.33546 4.09753   9
  15   4   0 -4.3598 4.04319   7
  15   4   0 7.30224 4.62694   3
  15   4   0 8.85282 4.29141  11
 -16  -4   0 15.8028 5.35587   4
 -16  -4   0 9.86335 4.27960   9
 -16  -4   0 12.7954 3.22619   6
  16   4   0 10.6795 5.34545   3
  16   4   0 9.50180 5.23655  11
 -17  -4   0 3.97722 3.74640   4
 -17  -4   0 -4.8674 3.03950   9
 -17  -4   0 -1.6519 2.49083   6
  17   4   0 5.21175 4.22751  11
  17   4   0 5.12396 5.59459   3
  14  -5   0 168.147 9.72569   3
 -14   5   0 156.410 14.6120   5
 -14   5   0 161.491 13.6979   9
 -14   5   0 175.132 11.5106   4
  13  -5   0 72.4732 6.70483   3
 -13   5   0 48.1915 8.33954   9
 -13   5   0 64.1895 8.96683   5
 -13   5   0 49.6583 6.53832   4
  12  -5   0 3.92269 2.87977   3
 -12   5   0 9.40735 3.95217   5
 -12   5   0 6.64623 3.04750   4
 -12   5   0 -1.5032 2.74014   9
  11  -5   0 92.0026 7.63589   3
 -11   5   0 85.0178 7.20824   4
 -11   5   0 98.8847 9.92169   5
 -11   5   0 101.667 9.22524   9
  10  -5   0 27.9762 4.54031   3
 -10   5   0 25.9064 5.65019   5
 -10   5   0 29.0724 4.71074   4
 -10   5   0 12.0421 7.91971   2
 -10   5   0 28.6677 5.68552   9
   9  -5   0 4.63713 2.39736   3
  -9   5   0 -0.7471 4.97061   2
  -9   5   0 8.27421 3.38094   9
  -9   5   0 1.26513 2.24176   8
  -9   5   0 0.77350 2.85710   5
   8  -5   0 7.62432 2.38386   3
  -8   5   0 2.88896 2.17904   8
  -8   5   0 8.35878 3.11464   9
  -8   5   0 2.76300 2.45543  11
  -8   5   0 5.44237 2.19485   4
  -8   5   0 -1.8788 3.86226   2
  -8   5   0 10.4813 3.73216   5
   7  -5   0 1.01034 6.59935   1
   7  -5   0 10.8277 2.70785   3
  -7   5   0 8.85089 2.29721   8
  -7   5   0 3.97768 1.92076   4
  -7   5   0 7.57699 3.31741  11
  -7   5   0 4.28734 2.76076   5
  -7   5   0 3.71702 3.83046   1
  -7   5   0 12.6593 3.29120   9
   6  -5   0 400.364 26.1194   1
   6  -5   0 418.200 14.1305   3
  -6   5   0 418.727 16.9196   5
  -6   5   0 433.087 20.5862   1
  -6   5   0 411.399 16.6384  11
  -6   5   0 429.542 15.9727   9
  -6   5   0 407.051 13.4663   4
  -6   5   0 413.059 13.9231   8
   5  -5   0 1956.32 46.7495   3
   5  -5   0 1796.51 60.1964   1
  -5   5   0 1941.04 49.9746  11
  -5   5   0 1989.38 50.1444   5
  -5   5   0 1922.99 54.3260   1
  -5   5   0 1858.35 46.0176   7
  -5   5   0 1945.35 48.3942   9
  -5   5   0 1917.94 45.5537   4
  -5   5   0 1867.15 48.8381   3
   4  -5   0 55.9625 4.05352   3
   4  -5   0 52.2104 6.75497   1
  -4   5   0 66.2382 5.20872  11
  -4   5   0 58.5824 3.48334   4
  -4   5   0 63.1710 5.24448   5
  -4   5   0 56.3248 5.36326   3
  -4   5   0 59.7605 3.76374   7
  -4   5   0 53.3757 5.92147   1
  -4   5   0 67.6463 9.24937  12
  -4   5   0 45.4370 10.6932  13
  -4   5   0 54.6347 4.32191   9
   3  -5   0 10.4298 3.05242   1
   3  -5   0 9.98917 2.06342   3
  -3   5   0 13.4873 3.41200   1
  -3   5   0 8.67525 5.39460  13
  -3   5   0 10.7753 1.55366   4
  -3   5   0 10.9370 5.18253  12
  -3   5   0 12.8693 2.35851   9
  -3   5   0 14.0694 2.91227   3
  -3   5   0 14.3745 2.90214  11
  -3   5   0 8.65228 2.29620   5
   2  -5   0 3.28187 5.25375  12
   2  -5   0 10.6051 2.80678   1
   2  -5   0 14.5055 1.36659   6
   2  -5   0 13.7250 2.07127   3
  -2   5   0 19.5476 4.79778   1
  -2   5   0 15.7259 2.20774   3
  -2   5   0 17.9833 2.64308   5
  -2   5   0 8.98852 2.87289  10
  -2   5   0 11.2109 1.38973   4
  -2   5   0 11.5507 1.70801   9
  -2   5   0 9.14295 6.33684  13
  -2   5   0 12.9916 1.19720   6
   1  -5   0 45.7392 8.96461  12
   1  -5   0 41.0991 3.09844   3
   1  -5   0 36.7186 4.20186   1
   1  -5   0 38.2792 2.35642   6
   1  -5   0 36.6394 2.99656   5
  -1   5   0 41.2634 3.10484   3
  -1   5   0 40.4877 2.34658   6
  -1   5   0 48.4324 4.61102  10
  -1   5   0 40.0555 2.37821   9
  -1   5   0 43.2105 3.45601   5
  -1   5   0 37.3993 5.39337   1
  -1   5   0 32.3161 8.00467  12
   0  -5   0 40.9811 9.56706  12
   0  -5   0 36.7968 2.47073   6
   0  -5   0 36.9868 2.75666   5
   0  -5   0 37.0505 3.64492  10
   0   5   0 33.7161 4.83297   1
   0   5   0 33.0474 2.31200   6
   0   5   0 35.0044 2.85397   3
   0   5   0 36.7909 3.24031   5
   0   5   0 37.5606 3.71025  10
   0   5   0 37.7477 2.30760   4
   0   5   0 36.4150 8.06799  12
   0   5   0 36.2593 4.67841   1
  -1  -5   0 1.91158 4.16872  12
  -1  -5   0 3.95977 1.50861  10
  -1  -5   0 5.89903 1.29136   6
  -1  -5   0 7.92313 1.62353   5
   1   5   0 5.44052 3.08985   1
   1   5   0 3.04682 3.32704  12
   1   5   0 7.28235 1.69606   3
   1   5   0 7.26161 3.03840   1
   1   5   0 6.56650 1.73317   2
   1   5   0 8.18242 1.49774   6
   1   5   0 7.63280 1.82871   5
   1   5   0 7.14160 1.97832  10
   1   5   0 4.88135 1.12844   4
  -2  -5   0 126.826 5.53699   4
  -2  -5   0 124.570 6.21938  10
  -2  -5   0 122.164 17.3805  12
  -2  -5   0 131.726 5.55896   6
  -2  -5   0 124.886 6.18772   2
  -2  -5   0 127.025 5.69654   5
   2   5   0 139.463 17.3844  12
   2   5   0 120.394 6.11906   7
   2   5   0 133.713 6.60168  10
   2   5   0 121.963 11.1488   1
   2   5   0 127.482 5.29249   4
   2   5   0 126.926 6.39911   2
   2   5   0 119.701 10.1190   1
   2   5   0 127.220 5.45165   6
   2   5   0 130.675 5.77885   5
  -3  -5   0 4075.19 120.559  12
  -3  -5   0 4197.57 111.530   1
  -3  -5   0 4016.42 91.3690   4
  -3  -5   0 4102.38 91.5713   5
  -3  -5   0 3949.75 91.0718   6
  -3  -5   0 4072.73 100.620  13
  -3  -5   0 3970.76 92.5250  10
  -3  -5   0 4009.71 88.8526   9
  -3  -5   0 3990.26 92.2198   2
   3   5   0 3928.98 92.2580   7
   3   5   0 4010.14 93.0794  10
   3   5   0 4092.01 117.209  12
   3   5   0 4076.88 109.386   1
   3   5   0 3998.93 90.9909   4
   3   5   0 4085.87 90.9977  11
   3   5   0 3991.54 91.0032   6
   3   5   0 3981.79 92.6798   2
  -4  -5   0 84.2717 10.8786   1
  -4  -5   0 80.3706 3.93416   9
  -4  -5   0 79.0058 4.66985   6
  -4  -5   0 82.8355 12.4210  12
  -4  -5   0 80.5058 5.02371   5
  -4  -5   0 89.4381 5.66794  10
  -4  -5   0 84.2308 4.68916  11
  -4  -5   0 91.6327 9.11616  13
  -4  -5   0 85.1654 5.23067   2
  -4  -5   0 79.6893 4.87832   4
   4   5   0 83.9961 5.51284   6
   4   5   0 83.4173 4.82251   4
   4   5   0 86.6827 10.7654   1
   4   5   0 81.5414 4.73534  11
   4   5   0 83.4997 5.41776   2
   4   5   0 83.1059 5.64221  10
   4   5   0 80.5325 11.8085  12
   4   5   0 84.7082 5.22046   7
  -5  -5   0 17.0809 2.66679   6
  -5  -5   0 7.65843 4.75705  13
  -5  -5   0 7.66700 6.00677  12
  -5  -5   0 18.1230 3.59314   2
  -5  -5   0 20.9134 2.80618   4
  -5  -5   0 16.7364 2.70970  11
  -5  -5   0 22.7349 3.00948  10
  -5  -5   0 17.8502 2.16908   9
  -5  -5   0 17.3130 6.35734   1
   5   5   0 19.0075 3.58064  10
   5   5   0 12.7754 5.76161  12
   5   5   0 22.5041 2.75676  11
   5   5   0 19.5411 6.50341   1
   5   5   0 16.2588 2.44872   4
   5   5   0 17.6903 2.52657   7
   5   5   0 15.4348 2.24059   6
   5   5   0 17.5881 3.23347   2
  -6  -5   0 3.31256 1.38974   6
  -6  -5   0 3.94522 4.38699  13
  -6  -5   0 4.77313 1.59710  11
  -6  -5   0 1.55468 1.42867  10
  -6  -5   0 3.31168 1.51012   4
  -6  -5   0 2.22490 1.21970   9
  -6  -5   0 -1.3452 5.17913  12
  -6  -5   0 1.27570 1.40371   2
   6   5   0 -1.9992 3.18225   1
   6   5   0 1.31973 1.57949   2
   6   5   0 3.46633 1.44933   4
   6   5   0 3.67188 1.70666  11
   6   5   0 5.33742 1.52956   6
   6   5   0 2.58684 1.47099   7
   6   5   0 5.29350 2.22010  10
   6   5   0 -3.6669 3.89797  12
  -7  -5   0 398.609 13.9853   9
  -7  -5   0 370.855 13.2592   6
  -7  -5   0 385.770 28.6992  12
  -7  -5   0 377.387 15.5691  10
  -7  -5   0 389.801 14.4067  11
  -7  -5   0 372.276 26.0538  13
  -7  -5   0 421.933 29.5291   1
  -7  -5   0 396.533 14.8635   4
  -7  -5   0 377.383 14.2580   2
   7   5   0 377.849 13.3258   6
   7   5   0 372.139 16.3496  10
   7   5   0 351.027 25.7313  12
   7   5   0 402.882 15.3140   2
   7   5   0 383.630 14.6550  11
   7   5   0 393.489 14.0527   7
   7   5   0 384.839 14.3486   4
   7   5   0 392.488 28.1062   1
  -8  -5   0 44.3314 4.50621   2
  -8  -5   0 47.8240 6.55927   4
  -8  -5   0 42.1086 5.19025  10
  -8  -5   0 47.8250 4.28264   6
  -8  -5   0 45.7908 4.63966  11
  -8  -5   0 49.6445 12.3562   1
  -8  -5   0 39.6566 4.34095   9
   8   5   0 47.8409 7.06630  10
   8   5   0 39.8063 3.88184   6
   8   5   0 47.2942 5.03575  11
   8   5   0 41.6789 5.04356   2
   8   5   0 46.2182 4.63377   4
   8   5   0 51.7021 3.83383   8
   8   5   0 39.0210 11.2001   1
   8   5   0 42.9896 4.25621   7
  -9  -5   0 70.8130 5.98484   2
  -9  -5   0 72.5613 6.04584   9
  -9  -5   0 78.5521 6.40528  11
  -9  -5   0 66.4393 6.14050   4
  -9  -5   0 73.7724 5.52044   6
  -9  -5   0 59.4613 6.57701  10
  -9  -5   0 70.2710 16.1961   1
   9   5   0 75.7704 7.04885   2
   9   5   0 74.8926 6.69425  11
   9   5   0 70.4214 5.96199   4
   9   5   0 79.0669 5.87118   7
   9   5   0 65.8847 4.42959   8
   9   5   0 70.8515 16.3850   1
 -10  -5   0 0.47296 1.54454   4
 -10  -5   0 -0.4462 1.35851   6
 -10  -5   0 1.37991 5.23283   1
 -10  -5   0 4.82672 2.56317  10
 -10  -5   0 0.92779 1.42211   2
 -10  -5   0 1.92342 1.67602   9
 -10  -5   0 2.76349 2.00397  11
  10   5   0 2.14362 4.78426   1
  10   5   0 2.04877 1.39588   8
  10   5   0 -0.5720 3.11090   2
  10   5   0 1.41672 1.47571   7
  10   5   0 -0.8125 1.42444  11
  10   5   0 5.09406 2.08779   4
 -11  -5   0 1192.79 33.2015   6
 -11  -5   0 1188.88 36.3419   9
 -11  -5   0 1175.54 35.5530   2
 -11  -5   0 1204.59 37.0461   4
 -11  -5   0 1132.34 62.6993   1
  11   5   0 1240.43 68.6181   1
  11   5   0 1180.72 29.8943   8
  11   5   0 1182.72 37.6998  11
  11   5   0 1182.80 33.8468   7
  11   5   0 1147.81 38.9858   2
 -12  -5   0 4.56328 2.81633   4
 -12  -5   0 -1.1540 1.77114   6
 -12  -5   0 1.32029 2.59538   2
  12   5   0 1.31099 2.62997  11
  12   5   0 -2.3600 2.35293   7
 -13  -5   0 17.5703 4.23106   2
 -13  -5   0 14.2891 4.29527   9
 -13  -5   0 13.4158 3.28664   6
 -13  -5   0 9.97164 3.82153   4
  13   5   0 4.48509 4.80885   2
  13   5   0 10.9105 4.32508  11
  13   5   0 13.7829 3.72262   7
 -14  -5   0 -0.3522 2.15333   6
 -14  -5   0 10.3350 3.94146   9
 -14  -5   0 3.27544 3.04647   4
  14   5   0 4.36240 3.58359  11
  14   5   0 -3.6019 4.70239   2
  14   5   0 2.83164 3.62974   7
 -15  -5   0 41.9246 5.65117   6
 -15  -5   0 42.7254 7.64018   9
 -15  -5   0 38.3209 7.17947   4
  15   5   0 40.6684 8.55695  11
  15   5   0 50.8888 6.94428   7
 -16  -5   0 7.78377 4.53830   9
 -16  -5   0 13.0565 3.78646   6
 -16  -5   0 21.5481 5.57218   4
  16   5   0 9.71878 5.04422  11
  16   5   0 13.1252 6.81258   7
  16   5   0 9.05918 4.71563   3
 -17  -5   0 8.94526 4.20635   4
 -17  -5   0 -0.0187 3.01493   6
 -17  -5   0 6.54643 4.11480   9
  17   5   0 -3.7670 3.69923  11
  17   5   0 -7.2074 3.83240   3
  13  -6   0 9.30102 3.26165   3
 -13   6   0 4.85873 3.46741   9
 -13   6   0 0.69349 3.89600   5
  12  -6   0 1.33808 2.73659   3
 -12   6   0 -0.2116 3.37233   5
 -12   6   0 8.88879 3.07085   4
 -12   6   0 2.28832 3.32300   9
 -11   6   0 36.9207 7.08348   9
 -11   6   0 40.0317 5.46771   4
 -11   6   0 30.6873 6.71061   5
  10  -6   0 172.347 9.36714   3
 -10   6   0 174.481 11.8005   9
 -10   6   0 196.264 13.5054   5
 -10   6   0 184.411 9.87122   4
   9  -6   0 126.171 7.60860   3
  -9   6   0 111.506 7.62008   8
  -9   6   0 103.399 13.6802   2
  -9   6   0 118.213 9.98766   5
  -9   6   0 111.280 8.93676   9
   8  -6   0 112.935 6.96748   3
  -8   6   0 115.688 9.44108   5
  -8   6   0 115.349 8.75855   9
  -8   6   0 121.019 7.12874   4
  -8   6   0 115.104 7.15026   8
   7  -6   0 15.8984 3.39575   3
  -7   6   0 24.5728 4.41155  11
  -7   6   0 20.1544 3.45364   8
  -7   6   0 20.2866 3.06581   4
  -7   6   0 16.6652 3.70976   9
  -7   6   0 19.4716 4.53644   5
  -7   6   0 14.4690 5.07527   1
   6  -6   0 49.2248 10.2138   1
   6  -6   0 56.8261 4.59031   3
  -6   6   0 52.3745 6.95599   9
  -6   6   0 46.8239 5.74517   5
  -6   6   0 44.0480 5.53367  11
  -6   6   0 49.7492 4.94460   3
  -6   6   0 48.6278 4.60570   8
  -6   6   0 46.5305 6.62249   1
  -6   6   0 56.9627 4.17403   4
   5  -6   0 11.8835 2.62496   3
  -5   6   0 15.4977 2.86767   7
  -5   6   0 13.1295 3.51607   1
  -5   6   0 16.1435 2.45185   4
  -5   6   0 12.1144 2.98024   9
  -5   6   0 11.1393 2.80043  11
  -5   6   0 18.6129 3.69457   3
  -5   6   0 16.2292 3.89676   5
   4  -6   0 95.3424 7.36574   1
   4  -6   0 103.519 5.79237   3
  -4   6   0 109.149 6.25064   9
  -4   6   0 100.408 4.74257   4
  -4   6   0 111.883 7.35702   5
  -4   6   0 99.2537 6.83186  11
  -4   6   0 108.595 8.03448   1
  -4   6   0 97.7043 7.76937   3
   3  -6   0 147.696 8.63441   1
   3  -6   0 141.091 6.67382   3
  -3   6   0 136.800 10.0286  10
  -3   6   0 137.652 5.27475   4
  -3   6   0 144.112 7.58311   3
  -3   6   0 112.300 15.4272  13
  -3   6   0 115.218 14.2139  12
  -3   6   0 141.042 7.87723   5
  -3   6   0 143.525 6.59083   9
  -3   6   0 140.885 9.29634   1
   2  -6   0 12.8244 1.59508   6
   2  -6   0 16.9532 3.25010   1
   2  -6   0 16.0237 2.76805   3
   2  -6   0 11.8991 6.95371  12
  -2   6   0 5.05814 5.48346  13
  -2   6   0 15.6539 4.06672  10
  -2   6   0 11.8723 1.35264   6
  -2   6   0 18.2916 4.66033   1
  -2   6   0 12.7954 2.75895   5
  -2   6   0 16.6157 2.79461   3
  -2   6   0 10.8942 1.50810   4
  -2   6   0 14.0280 6.79926  12
  -2   6   0 13.6812 1.90477   9
   1  -6   0 110.073 5.81005   3
   1  -6   0 109.757 5.76503   5
   1  -6   0 114.079 4.80892   6
  -1   6   0 122.125 4.66704   9
  -1   6   0 119.860 4.74027   6
  -1   6   0 130.531 8.10848  10
  -1   6   0 130.029 6.73946   5
  -1   6   0 113.662 5.88452   3
  -1   6   0 115.533 9.95232   1
  -1   6   0 119.598 14.1446  12
   0  -6   0 715.715 39.6178  12
   0  -6   0 693.079 18.3690   6
   0  -6   0 696.555 19.1147   5
   0   6   0 693.509 19.6213   3
   0   6   0 694.449 37.1653  12
   0   6   0 696.328 17.8181   4
   0   6   0 707.054 20.7376   5
   0   6   0 705.007 26.5477   1
   0   6   0 694.825 18.2058   6
   0   6   0 665.330 26.9317   1
   0   6   0 702.444 21.6710  10
  -1  -6   0 40.6009 10.2503  12
  -1  -6   0 55.6506 3.54634   6
  -1  -6   0 58.8808 3.72268   5
  -1  -6   0 59.4153 4.60500  10
   1   6   0 54.1984 3.87238   3
   1   6   0 51.2927 9.23321  12
   1   6   0 54.7814 3.44009   6
   1   6   0 64.1456 7.60903   1
   1   6   0 56.4360 4.47705   2
   1   6   0 59.0456 4.43478   5
   1   6   0 57.9840 3.26471   4
   1   6   0 54.8307 4.56569  10
   1   6   0 46.0015 7.28308   1
  -2  -6   0 233.486 8.77994   5
  -2  -6   0 228.950 8.44282   6
  -2  -6   0 213.143 8.23050   4
  -2  -6   0 229.174 22.1611  12
  -2  -6   0 233.611 9.65084  10
   2   6   0 226.587 9.76589  10
   2   6   0 226.945 9.72283   2
   2   6   0 228.120 8.01936   4
   2   6   0 235.884 8.99626   5
   2   6   0 225.300 9.11989   3
   2   6   0 208.399 15.6006   1
   2   6   0 217.193 10.2106   7
   2   6   0 222.242 20.0013  12
   2   6   0 226.291 15.2067   1
   2   6   0 227.901 8.32289   6
  -3  -6   0 2.88761 4.09416  12
  -3  -6   0 1.64068 1.16068   5
  -3  -6   0 2.22721 1.23725   2
  -3  -6   0 1.74958 1.08244   4
  -3  -6   0 1.39527 0.86725   6
  -3  -6   0 2.10070 0.62790   9
  -3  -6   0 -0.2511 2.48283  13
   3   6   0 1.27039 1.05744   5
   3   6   0 1.13144 1.19593   2
   3   6   0 1.32144 1.24888   6
   3   6   0 -0.4879 3.65310  12
   3   6   0 3.00848 1.21904  11
   3   6   0 -1.0939 1.80029   1
   3   6   0 -0.5119 0.77579   7
   3   6   0 1.31979 0.94061   4
   3   6   0 2.80293 1.41344  10
  -4  -6   0 28.2196 3.10761   4
  -4  -6   0 31.1951 3.07625   6
  -4  -6   0 32.1273 3.30093   5
  -4  -6   0 26.2684 3.34684  10
  -4  -6   0 31.8383 3.40230   2
  -4  -6   0 30.2152 2.25948   9
  -4  -6   0 23.8761 8.82677  12
  -4  -6   0 28.7014 8.57991   1
  -4  -6   0 23.6654 5.39572  13
   4   6   0 29.4042 3.72536  10
   4   6   0 30.4514 8.36609  12
   4   6   0 38.1838 9.03170   1
   4   6   0 27.4111 3.45926   2
   4   6   0 31.4490 3.00128   6
   4   6   0 33.0073 3.47303   7
   4   6   0 29.7292 3.03479  11
   4   6   0 31.6220 3.00148   4
  -5  -6   0 51.2798 4.80893  10
  -5  -6   0 49.3005 4.38780   2
  -5  -6   0 50.1077 3.42869   9
  -5  -6   0 51.9862 4.45790   5
  -5  -6   0 55.0718 4.47889   4
  -5  -6   0 39.0254 9.82515   1
  -5  -6   0 48.6637 8.58033  13
  -5  -6   0 40.9929 10.8172  12
  -5  -6   0 53.5015 4.10906   6
   5   6   0 51.0106 4.22878  11
   5   6   0 49.9473 4.07440   4
   5   6   0 39.2050 10.6095  12
   5   6   0 55.7764 5.16830  10
   5   6   0 57.5153 4.14918   6
   5   6   0 46.1733 10.6382   1
   5   6   0 55.0136 4.82514   2
   5   6   0 50.8214 4.45892   7
  -6  -6   0 430.935 14.7082   6
  -6  -6   0 453.984 33.2971  12
  -6  -6   0 438.077 14.0610   9
  -6  -6   0 455.118 15.9436   2
  -6  -6   0 434.568 15.0147  11
  -6  -6   0 438.001 25.5959  13
  -6  -6   0 463.482 31.1282   1
  -6  -6   0 436.705 18.6102   5
  -6  -6   0 437.802 15.6343   4
  -6  -6   0 435.227 16.5103  10
   6   6   0 450.537 14.7597   6
   6   6   0 467.047 16.5497   2
   6   6   0 438.055 15.2633  11
   6   6   0 449.163 17.4385  10
   6   6   0 424.121 29.1218   1
   6   6   0 422.974 15.0564   4
   6   6   0 443.280 15.6209   7
   6   6   0 439.697 30.3819  12
  -7  -6   0 57.5358 5.25657   4
  -7  -6   0 59.5331 4.72381   6
  -7  -6   0 61.3151 4.72007   9
  -7  -6   0 61.4691 5.83794  10
  -7  -6   0 55.6328 12.8627   1
  -7  -6   0 59.5633 5.12870   2
  -7  -6   0 56.9842 4.95730  11
  -7  -6   0 46.8085 12.2404  12
   7   6   0 57.0173 6.10094  10
   7   6   0 53.6338 5.05434  11
   7   6   0 58.9546 5.04462   7
   7   6   0 63.2225 4.74993   6
   7   6   0 53.7169 12.1537   1
   7   6   0 63.4617 5.72065   2
   7   6   0 66.7207 5.27929   4
  -8  -6   0 1638.50 43.0750   9
  -8  -6   0 1758.88 72.4487   1
  -8  -6   0 1639.90 44.0939  11
  -8  -6   0 1654.59 44.9363   4
  -8  -6   0 1664.86 42.8597   6
  -8  -6   0 1652.34 44.3509   2
  -8  -6   0 1595.82 46.1576  10
   8   6   0 1655.02 42.7800   6
   8   6   0 1689.73 44.8126  11
   8   6   0 1694.31 43.9616   7
   8   6   0 1676.13 41.6128   8
   8   6   0 1622.53 69.3562   1
   8   6   0 1638.90 47.8673  10
   8   6   0 1638.23 45.5066   2
   8   6   0 1647.07 44.1251   4
  -9  -6   0 29.6567 6.09684  10
  -9  -6   0 38.8149 6.62940   9
  -9  -6   0 34.6921 4.32380   2
  -9  -6   0 33.4619 4.90955   4
  -9  -6   0 41.6038 4.49803   6
  -9  -6   0 36.2082 11.1414   1
  -9  -6   0 30.6116 4.34734  11
   9   6   0 31.7411 5.95999  10
   9   6   0 39.0128 5.19742  11
   9   6   0 37.4459 5.36810   2
   9   6   0 40.8807 3.85124   8
   9   6   0 27.3633 4.93287   4
   9   6   0 48.5515 12.7000   1
   9   6   0 41.5746 4.68067   7
 -10  -6   0 135.116 20.9643   1
 -10  -6   0 113.533 9.37415  10
 -10  -6   0 134.590 8.87087   9
 -10  -6   0 132.001 8.94702  11
 -10  -6   0 135.624 8.13467   6
 -10  -6   0 122.915 8.42917   2
 -10  -6   0 141.569 9.67730   4
  10   6   0 135.329 10.0891   2
  10   6   0 129.820 18.4446   1
  10   6   0 158.670 10.2323  11
  10   6   0 135.557 8.80624   4
  10   6   0 150.337 7.20973   8
  10   6   0 127.263 8.25950   7
 -11  -6   0 16.8192 3.55687   6
 -11  -6   0 10.8657 10.1977   1
 -11  -6   0 21.5924 4.49630   2
 -11  -6   0 21.3153 4.73782   4
 -11  -6   0 19.4156 4.41740   9
  11   6   0 32.3767 4.63424   7
  11   6   0 14.3688 8.03668   1
  11   6   0 19.2433 5.12221   2
  11   6   0 19.4224 4.92265  11
  11   6   0 18.0959 3.07098   8
 -12  -6   0 3.30382 2.70826   2
 -12  -6   0 4.47182 2.62170   9
 -12  -6   0 6.29180 3.49804   4
 -12  -6   0 5.58820 2.45154   6
  12   6   0 4.68329 3.82283   2
  12   6   0 3.39481 2.87468  11
  12   6   0 3.58337 1.80544   8
 -13  -6   0 14.2903 4.78469   4
 -13  -6   0 8.82637 3.09190   6
 -13  -6   0 12.3184 3.94186   2
 -13  -6   0 8.47972 3.47642   9
  13   6   0 9.52644 4.26616   2
  13   6   0 12.5862 4.45115  11
  13   6   0 12.1472 3.63728   7
 -14  -6   0 77.8105 6.77472   6
 -14  -6   0 74.5321 8.46986   4
 -14  -6   0 70.2471 8.32013   9
  14   6   0 76.6411 9.17058  11
  14   6   0 87.5748 11.0966   2
  14   6   0 77.2242 7.48568   7
 -15  -6   0 11.3711 4.42525   9
 -15  -6   0 2.66749 3.35111   4
 -15  -6   0 9.11546 3.22843   6
  15   6   0 4.90699 3.88878  11
  15   6   0 3.13363 5.46602   2
 -16  -6   0 443.523 22.7739   9
 -16  -6   0 453.217 23.0959   4
 -16  -6   0 453.295 18.6461   6
  16   6   0 436.640 24.2600  11
 -17  -6   0 9.03533 4.67511   4
 -17  -6   0 1.08435 3.62019   9
 -17  -6   0 -2.4239 2.47836   6
  17   6   0 2.85322 4.80917   3
  17   6   0 -0.0456 4.21913  11
 -13   7   0 17.8555 6.30297   5
 -13   7   0 26.1334 6.49931   9
 -13   7   0 17.1875 4.63217   4
  12  -7   0 3.53367 2.83609   3
 -12   7   0 2.65497 2.90887   9
 -12   7   0 1.12771 3.49137   5
  11  -7   0 19.7663 4.84093   3
 -11   7   0 6.47683 4.36198   9
 -11   7   0 1.90094 3.69200   5
 -11   7   0 16.2701 3.57857   4
  10  -7   0 4.28236 2.98195   3
 -10   7   0 6.81908 1.98887   8
 -10   7   0 2.77168 2.13446   4
 -10   7   0 4.12342 3.43194   5
 -10   7   0 6.56397 3.11990   9
   9  -7   0 405.106 15.0237   3
  -9   7   0 382.633 17.9341   9
  -9   7   0 412.139 19.9898   5
  -9   7   0 389.026 15.1683   8
  -9   7   0 397.730 15.9294   4
   8  -7   0 448.623 15.5260   3
  -8   7   0 416.609 14.6836   4
  -8   7   0 425.570 19.5747   5
  -8   7   0 395.801 15.3896   8
  -8   7   0 412.038 17.9173   9
   7  -7   0 87.8547 6.22804   3
  -7   7   0 80.4669 6.51651   8
  -7   7   0 84.1310 6.87449   3
  -7   7   0 89.5877 8.37036   5
  -7   7   0 84.3623 7.99091  11
  -7   7   0 81.8856 7.11782   9
  -7   7   0 94.7193 5.75466   4
   6  -7   0 101.685 6.36209   3
  -6   7   0 85.0869 6.95214   3
  -6   7   0 103.810 6.83039   8
  -6   7   0 98.8148 7.11877   9
  -6   7   0 96.5770 8.14526   5
  -6   7   0 89.9605 5.29371   4
  -6   7   0 101.418 8.16071  11
   5  -7   0 487.007 15.8776   3
  -5   7   0 477.346 18.4099  11
  -5   7   0 481.921 14.0617   4
  -5   7   0 479.888 18.5798   5
  -5   7   0 436.046 21.6580  10
  -5   7   0 457.256 18.5972   3
  -5   7   0 453.756 15.2202   7
  -5   7   0 477.554 16.7127   9
   4  -7   0 60.7033 4.68855   3
  -4   7   0 59.0426 4.67776   9
  -4   7   0 61.1601 5.95331   5
  -4   7   0 51.9540 5.85847   3
  -4   7   0 59.6682 3.61176   4
  -4   7   0 60.4523 5.47953  11
  -4   7   0 61.3162 7.51729  10
   3  -7   0 0.14702 1.68495   1
   3  -7   0 1.49933 1.39327   3
   3  -7   0 2.29405 0.89320   6
  -3   7   0 0.91910 1.10539   9
  -3   7   0 -2.1782 2.40605   1
  -3   7   0 1.95839 2.44712  10
  -3   7   0 0.63056 0.84046   4
  -3   7   0 0.87593 1.61588   3
  -3   7   0 1.55255 1.54855   5
   2  -7   0 18.1905 2.79459   3
   2  -7   0 14.8330 1.82210   6
  -2   7   0 15.2346 3.03802   3
  -2   7   0 21.0410 6.63542   1
  -2   7   0 13.7820 1.89904   9
  -2   7   0 15.3469 1.70785   4
  -2   7   0 14.8260 3.93768  10
  -2   7   0 18.0903 1.77505   6
  -2   7   0 18.0626 3.32322   5
   1  -7   0 799.926 46.8526  12
   1  -7   0 780.557 24.9630   5
   1  -7   0 838.282 21.0535   6
  -1   7   0 696.735 36.2894   1
  -1   7   0 822.620 20.7933   6
  -1   7   0 842.436 43.9138  12
  -1   7   0 831.451 24.3133   5
  -1   7   0 829.392 26.8245  10
  -1   7   0 833.767 23.0975   3
  -1   7   0 850.994 20.3348   9
  -1   7   0 774.895 32.1256   1
   0  -7   0 1115.39 29.0788   5
   0  -7   0 1131.84 32.8906  10
   0  -7   0 1067.53 54.5060  12
   0  -7   0 1110.03 28.1751   6
   0   7   0 1124.06 31.4340   5
   0   7   0 1134.25 29.8273   3
   0   7   0 1159.39 32.6397  10
   0   7   0 1124.58 27.4069   4
   0   7   0 1146.96 28.0475   6
   0   7   0 1123.55 39.6059   1
   0   7   0 1107.65 31.4637   2
   0   7   0 1149.59 53.5959  12
   0   7   0 1103.48 38.4609   1
  -1  -7   0 1163.77 57.9959  12
  -1  -7   0 1187.85 33.1519  10
  -1  -7   0 1205.76 30.2317   6
  -1  -7   0 1188.56 30.2663   5
   1   7   0 1162.42 41.1368   1
   1   7   0 1206.56 55.5076  12
   1   7   0 1191.57 31.3391   3
   1   7   0 1214.50 33.4264  10
   1   7   0 1177.28 29.8224   6
   1   7   0 1182.08 43.0499   1
   1   7   0 1222.89 29.3028   4
   1   7   0 1186.11 32.8546   2
   1   7   0 1188.37 32.5160   5
  -2  -7   0 15.2928 3.10473  10
  -2  -7   0 16.1097 2.29333   6
  -2  -7   0 6.82242 5.64693  12
  -2  -7   0 16.5010 2.40680   5
   2   7   0 15.0332 3.10343   2
   2   7   0 15.6305 4.95478   1
   2   7   0 15.0192 2.01088   4
   2   7   0 11.9774 5.49567  12
   2   7   0 23.0557 6.11232   1
   2   7   0 14.9490 2.39392   6
   2   7   0 15.4902 3.22215  10
   2   7   0 14.4645 2.88704   7
   2   7   0 16.4684 2.54263   3
   2   7   0 18.3114 3.08276   5
  -3  -7   0 425.247 19.9615  13
  -3  -7   0 409.215 13.7575   6
  -3  -7   0 424.912 15.1292  10
  -3  -7   0 428.258 14.2281   5
  -3  -7   0 449.643 33.9868  12
  -3  -7   0 423.755 13.9648   4
   3   7   0 396.483 24.8498   1
   3   7   0 435.773 13.5122   4
   3   7   0 430.956 15.1387   7
   3   7   0 430.362 15.7882  10
   3   7   0 435.249 15.6888   2
   3   7   0 420.965 13.5724  11
   3   7   0 425.424 13.6693   6
   3   7   0 423.512 23.8026   1
   3   7   0 443.073 14.3282   5
   3   7   0 416.975 30.6133  12
   3   7   0 413.493 14.4257   3
  -4  -7   0 29.5310 6.09186  13
  -4  -7   0 30.0744 2.10418   9
  -4  -7   0 25.6438 3.47060  10
  -4  -7   0 26.1243 3.07582   5
  -4  -7   0 18.6704 9.07845  12
  -4  -7   0 28.3695 3.17998   4
  -4  -7   0 25.2789 3.29785   2
  -4  -7   0 27.4145 3.17998   6
   4   7   0 23.9521 3.44836   2
   4   7   0 27.6014 3.03239  11
   4   7   0 15.6721 8.00120  12
   4   7   0 24.6577 2.85343   6
   4   7   0 31.6064 8.89640   1
   4   7   0 31.0970 3.62698   4
   4   7   0 27.1343 3.46157   7
   4   7   0 26.7966 3.70120  10
  -5  -7   0 17.8837 3.48966  10
  -5  -7   0 19.6558 3.30886   4
  -5  -7   0 22.9001 3.03690   6
  -5  -7   0 26.4659 8.37342   1
  -5  -7   0 28.7519 3.39228   5
  -5  -7   0 20.7963 3.72334   2
  -5  -7   0 20.8805 2.21303   9
  -5  -7   0 27.7712 10.4416  12
  -5  -7   0 15.2525 5.20312  13
   5   7   0 17.8380 6.56306   1
   5   7   0 25.6708 3.45906   7
   5   7   0 19.6008 2.71575   6
   5   7   0 25.0489 3.10181  11
   5   7   0 18.5037 3.12554   4
   5   7   0 10.3937 6.80406  12
   5   7   0 18.5750 3.61960  10
   5   7   0 23.6531 3.52261   2
  -6  -7   0 0.03308 1.28705   6
  -6  -7   0 2.37432 1.14524   9
  -6  -7   0 2.82918 1.21121  11
  -6  -7   0 -1.7293 3.92179  13
  -6  -7   0 0.57738 1.51923  10
  -6  -7   0 -12.597 7.70491  12
  -6  -7   0 0.85024 1.02094   2
  -6  -7   0 1.56430 1.49852   4
  -6  -7   0 1.82117 1.69273   5
   6   7   0 1.07679 1.10028   4
   6   7   0 1.69463 1.57400   2
   6   7   0 0.98397 1.54877  10
   6   7   0 0.16716 0.86188   6
   6   7   0 9.52844 7.41537  12
   6   7   0 -0.7934 1.06315   7
   6   7   0 0.38345 1.30010  11
  -7  -7   0 161.140 8.87310   2
  -7  -7   0 163.880 9.10108   4
  -7  -7   0 150.803 8.35991   6
  -7  -7   0 154.695 9.48718  10
  -7  -7   0 150.703 8.24430  11
  -7  -7   0 157.518 9.22115   5
  -7  -7   0 162.967 7.84763   9
  -7  -7   0 178.890 20.1062   1
   7   7   0 155.065 8.69906   7
   7   7   0 166.712 9.68595   2
   7   7   0 151.105 12.9727  10
   7   7   0 141.817 17.5205   1
   7   7   0 152.734 8.41681   4
   7   7   0 171.233 8.96724  11
   7   7   0 150.381 8.02398   6
  -8  -7   0 102.833 7.05206  11
  -8  -7   0 95.5381 7.79287  10
  -8  -7   0 105.149 7.62397   4
  -8  -7   0 98.4681 6.73519   6
  -8  -7   0 106.984 6.72614   9
  -8  -7   0 98.1415 7.14870   2
   8   7   0 106.394 6.68855   6
   8   7   0 105.934 7.21586   4
   8   7   0 103.877 8.79105  10
   8   7   0 98.9144 7.92760   2
   8   7   0 100.231 7.70808  11
   8   7   0 82.2343 17.0658   1
   8   7   0 94.1681 6.96231   7
  -9  -7   0 2230.21 58.1956  11
  -9  -7   0 2253.15 56.8894   6
  -9  -7   0 2209.18 61.2742  10
  -9  -7   0 2316.01 92.1475   1
  -9  -7   0 2240.48 59.2059   4
  -9  -7   0 2234.29 58.5842   2
  -9  -7   0 2226.77 57.7061   9
   9   7   0 2234.03 58.6389   4
   9   7   0 2293.10 59.0682  11
   9   7   0 2241.44 57.9501   7
   9   7   0 2201.67 88.5816   1
   9   7   0 2305.52 55.5295   8
   9   7   0 2306.61 60.6141   2
   9   7   0 2246.14 56.8519   6
   9   7   0 2248.88 62.9719  10
 -10  -7   0 8.80811 2.97098   2
 -10  -7   0 4.27581 2.62792  11
 -10  -7   0 6.91019 3.18661   4
 -10  -7   0 1.28833 7.06794   1
 -10  -7   0 8.16316 2.93803   9
 -10  -7   0 4.88194 3.44286  10
 -10  -7   0 6.42583 2.44204   6
  10   7   0 10.6913 3.55681  11
  10   7   0 9.06298 2.45347   8
  10   7   0 10.0480 3.49678   2
  10   7   0 9.68957 6.58899   1
  10   7   0 12.1954 2.97502   4
  10   7   0 10.5220 3.24067   7
 -11  -7   0 68.3504 6.13587   6
 -11  -7   0 57.8750 7.06520   2
 -11  -7   0 70.8848 7.20164   4
 -11  -7   0 67.5806 6.73048   9
  11   7   0 57.6079 7.50433   2
  11   7   0 46.3817 5.86125   7
  11   7   0 69.9918 5.41167   8
  11   7   0 63.6381 7.17190  11
 -12  -7   0 0.03474 1.96489   9
 -12  -7   0 0.12278 1.87257   6
 -12  -7   0 -1.0550 1.74800   4
  12   7   0 2.54380 2.98291   2
  12   7   0 0.17346 1.54819   8
 -13  -7   0 21.3370 4.19844   6
 -13  -7   0 22.4738 5.29452   9
 -13  -7   0 16.1030 4.40036   4
  13   7   0 16.5274 5.41376  11
  13   7   0 17.7087 4.00244   7
  13   7   0 19.3724 3.22826   8
  13   7   0 16.0678 5.55011   2
 -14  -7   0 14.0699 4.87353   4
 -14  -7   0 10.5891 4.17084   9
 -14  -7   0 6.54636 2.75161   6
  14   7   0 4.98286 4.84948   2
  14   7   0 3.94809 3.80897  11
 -15  -7   0 15.0385 3.88809   6
 -15  -7   0 13.1759 5.17133   4
 -15  -7   0 14.8048 4.59895   9
  15   7   0 6.75721 5.57219   2
  15   7   0 4.56800 4.34030  11
 -16  -7   0 -1.7373 2.57284   6
 -16  -7   0 6.25883 3.81512   4
 -16  -7   0 -1.2789 3.33068   9
  16   7   0 0.84949 6.04719   2
 -17  -7   0 432.784 22.7735   9
 -17  -7   0 401.695 22.8570   4
 -17  -7   0 405.081 23.4206   6
  17   7   0 410.981 23.8528  11
  12  -8   0 117.591 8.37270   3
 -12   8   0 152.052 14.2170   5
 -12   8   0 143.188 11.9436   9
 -12   8   0 127.468 8.68495   4
  11  -8   0 6.55639 3.16280   3
 -11   8   0 3.86411 2.54614   4
 -11   8   0 5.48563 4.49237   5
 -11   8   0 6.64178 4.10216   9
  10  -8   0 23.5060 5.11037   3
 -10   8   0 31.2166 7.32363   5
 -10   8   0 33.2663 5.40734   8
 -10   8   0 28.1814 3.84516   8
 -10   8   0 25.3958 5.52900   9
 -10   8   0 28.6934 4.36992   4
   9  -8   0 5.96418 4.02765   3
  -9   8   0 -6.1113 2.96210   8
  -9   8   0 2.42035 1.99747   4
  -9   8   0 -0.6274 2.53908   9
  -9   8   0 0.24741 2.79170   5
   8  -8   0 143.454 8.24129   3
  -8   8   0 129.183 7.17530   4
  -8   8   0 140.501 9.87408   9
  -8   8   0 118.122 8.32931   8
  -8   8   0 127.832 10.5051   5
   7  -8   0 1.32257 1.94432   3
  -7   8   0 4.52417 2.92355   5
  -7   8   0 -1.8297 2.61884   8
  -7   8   0 1.87892 1.64157   4
  -7   8   0 7.48902 4.26211  10
  -7   8   0 6.96584 3.29534   3
  -7   8   0 1.18551 2.46200   9
   6  -8   0 19.4460 3.55544   3
  -6   8   0 18.1944 4.76169   3
  -6   8   0 19.3729 2.73331   4
  -6   8   0 16.3886 4.58878   5
  -6   8   0 24.2225 4.57999  11
  -6   8   0 15.0974 5.75944  10
  -6   8   0 17.1684 3.48205   7
  -6   8   0 18.4770 3.86721   8
  -6   8   0 21.7344 2.73544   7
  -6   8   0 16.8201 3.58302   9
   5  -8   0 0.69593 1.71197   3
  -5   8   0 2.45019 2.40935   5
  -5   8   0 5.45254 2.83935   3
  -5   8   0 0.69566 1.21077   4
  -5   8   0 4.72035 2.03178   7
  -5   8   0 1.25742 2.25105  11
  -5   8   0 4.60891 3.14565  10
  -5   8   0 2.25060 1.85591   9
   4  -8   0 744.919 21.8673   3
  -4   8   0 731.545 21.5209   9
  -4   8   0 710.712 24.2811  11
  -4   8   0 713.150 24.3825   5
  -4   8   0 653.854 27.7944  10
  -4   8   0 711.706 24.7735   3
  -4   8   0 708.926 18.6827   4
   3  -8   0 31.8682 2.65597   6
   3  -8   0 33.9406 3.94587   3
  -3   8   0 41.7146 2.78576   4
  -3   8   0 48.1553 8.19417  10
  -3   8   0 38.5384 4.92078   5
  -3   8   0 41.3635 3.67494   9
  -3   8   0 33.0637 4.30874   3
   2  -8   0 38.6825 2.97952   6
   2  -8   0 36.6696 3.92505   3
  -2   8   0 56.0440 10.3945   1
  -2   8   0 35.7002 5.55560   1
  -2   8   0 37.4093 3.05408   9
  -2   8   0 39.9024 4.78389   5
  -2   8   0 47.1700 6.20187  10
  -2   8   0 36.8142 2.59188   4
  -2   8   0 36.6901 4.13567   3
   1  -8   0 0.70792 1.19379   5
   1  -8   0 2.18697 1.17956   6
  -1   8   0 3.26088 2.33464  10
  -1   8   0 1.25352 0.94351   6
  -1   8   0 -1.3972 1.13335   3
  -1   8   0 2.28409 1.08592   4
  -1   8   0 -1.0000 2.62256   1
  -1   8   0 0.64448 3.75474   1
  -1   8   0 0.55783 1.53544   5
  -1   8   0 1.04016 0.83564   9
   0  -8   0 60.5653 4.66074   5
   0  -8   0 62.4732 4.11979   6
   0  -8   0 67.7056 6.33915  10
   0   8   0 62.6822 5.63926   2
   0   8   0 60.0114 6.04788  10
   0   8   0 54.3465 5.49884   5
   0   8   0 55.9722 7.87688   1
   0   8   0 60.0809 3.93539   6
   0   8   0 62.6644 3.56675   4
   0   8   0 62.9353 7.84286   1
   0   8   0 63.8362 4.88003   3
  -1  -8   0 26.7565 3.04717   5
  -1  -8   0 15.3791 13.2156  12
  -1  -8   0 24.3091 4.40119  10
  -1  -8   0 24.9465 2.88093   6
   1   8   0 28.3388 4.15634  10
   1   8   0 26.8528 3.58641   5
   1   8   0 23.9302 13.1900  12
   1   8   0 20.2223 2.52240   6
   1   8   0 25.8067 3.21676   3
   1   8   0 22.8724 6.65884   1
   1   8   0 25.3500 6.23958   1
   1   8   0 23.8521 2.35680   4
   1   8   0 21.6910 3.91715   2
  -2  -8   0 66.7325 4.59107   5
  -2  -8   0 63.7927 5.66216  10
  -2  -8   0 74.1594 4.81796   6
  -2  -8   0 71.9970 15.3067  12
   2   8   0 64.4905 4.39531   6
   2   8   0 74.6658 5.97257   2
   2   8   0 78.9121 10.1713   1
   2   8   0 66.5388 4.09098   4
   2   8   0 74.9095 5.32797   5
   2   8   0 59.8446 8.74614   1
   2   8   0 70.5883 5.12054   3
   2   8   0 63.2156 5.70165  10
   2   8   0 56.2044 13.6722  12
   2   8   0 69.6273 5.39541   7
  -3  -8   0 69.3456 4.90361   6
  -3  -8   0 72.5693 5.03446   5
  -3  -8   0 74.1594 5.76279  10
  -3  -8   0 75.2596 5.11531   4
  -3  -8   0 57.7135 14.9622  12
   3   8   0 56.4653 13.9351  12
   3   8   0 64.0825 5.29655   7
   3   8   0 70.2712 4.74317   6
   3   8   0 70.9369 6.08481  10
   3   8   0 69.2253 10.1396   1
   3   8   0 70.6208 5.29930   3
   3   8   0 76.7268 6.13622   2
   3   8   0 71.0996 4.84299  11
   3   8   0 75.2826 9.96346   1
   3   8   0 72.4253 4.54969   4
   3   8   0 75.2351 5.14903   5
  -4  -8   0 239.452 15.6572  13
  -4  -8   0 234.634 10.9731   2
  -4  -8   0 236.237 10.1019   5
  -4  -8   0 231.974 10.1356   4
  -4  -8   0 244.758 11.2616  10
  -4  -8   0 232.932 9.94364   6
  -4  -8   0 209.682 24.8910  12
   4   8   0 200.174 23.3667  12
   4   8   0 247.866 9.90640   6
   4   8   0 235.265 10.9025   7
   4   8   0 236.468 9.48205   4
   4   8   0 239.749 19.1392   1
   4   8   0 227.632 11.4151  10
   4   8   0 242.557 20.6327   1
   4   8   0 242.979 11.6155   2
   4   8   0 233.752 9.63938  11
  -5  -8   0 99.3914 7.08547  10
  -5  -8   0 102.741 6.87733   2
  -5  -8   0 92.3924 6.26218   5
  -5  -8   0 100.451 6.31205   6
  -5  -8   0 93.7486 6.26633   4
  -5  -8   0 96.8987 4.53561   9
   5   8   0 102.452 7.00815   7
   5   8   0 108.593 6.41973  11
   5   8   0 102.506 7.36357   2
   5   8   0 93.7135 13.4811   1
   5   8   0 99.1268 6.15933   6
   5   8   0 107.867 7.78496  10
   5   8   0 100.778 6.14342   4
  -6  -8   0 12.3916 3.08167   4
  -6  -8   0 10.2729 2.79820   2
  -6  -8   0 12.2843 3.19621  10
  -6  -8   0 11.1972 3.03990   5
  -6  -8   0 12.1651 2.25468   9
  -6  -8   0 -0.5680 5.60935   1
   6   8   0 9.02165 2.63047   7
   6   8   0 7.87169 2.09031   6
   6   8   0 12.3941 3.37753   2
   6   8   0 11.0211 5.33447   1
   6   8   0 9.85452 2.65468  11
   6   8   0 9.11138 2.46517   4
   6   8   0 10.0433 3.38708  10
  -7  -8   0 14.0428 2.92685   6
  -7  -8   0 21.3925 2.98036   9
  -7  -8   0 7.15849 5.92048   1
  -7  -8   0 16.5102 3.56858  11
  -7  -8   0 12.5009 3.57008  10
  -7  -8   0 12.8645 3.19895   2
  -7  -8   0 23.7067 4.52046   5
   7   8   0 10.4310 3.38564  10
   7   8   0 16.2808 3.51249   7
   7   8   0 12.1954 2.84188   4
   7   8   0 9.38666 5.86172   1
   7   8   0 19.2212 3.55935  11
   7   8   0 18.1338 3.45247   6
   7   8   0 7.69481 4.18046   2
  -8  -8   0 22.4295 9.01232   1
  -8  -8   0 16.6748 3.33426   9
  -8  -8   0 18.3987 4.57641  10
  -8  -8   0 25.0627 4.20702  11
  -8  -8   0 19.1057 3.99502   2
  -8  -8   0 20.9108 3.84598   6
  -8  -8   0 20.8308 4.19343   4
  -8  -8   0 20.2529 4.21777   5
   8   8   0 19.6239 4.14229   7
   8   8   0 18.6805 4.07744   2
   8   8   0 17.6312 5.74284  11
   8   8   0 21.2244 4.02633   4
   8   8   0 31.5902 9.81553   1
   8   8   0 16.6879 3.07652   6
   8   8   0 13.3558 4.20953  10
  -9  -8   0 11.9865 3.00830   9
  -9  -8   0 5.92527 2.83559   2
  -9  -8   0 15.0945 3.24794   6
  -9  -8   0 10.1420 3.28438   4
  -9  -8   0 12.2138 3.25724  11
  -9  -8   0 16.1597 4.28187   5
  -9  -8   0 2.32291 6.72894   1
   9   8   0 10.1710 2.84896   8
   9   8   0 13.0365 3.30062   4
   9   8   0 18.4361 4.48229   2
   9   8   0 7.93000 3.25506  10
   9   8   0 26.0170 9.61598   1
   9   8   0 5.33861 2.14169   6
   9   8   0 15.2483 4.19019   7
   9   8   0 11.6508 3.29910  11
 -10  -8   0 8.81392 3.61226  11
 -10  -8   0 10.2892 3.38030   4
 -10  -8   0 11.5289 3.10079   6
 -10  -8   0 8.18638 2.88966   9
 -10  -8   0 19.5901 9.11829   1
 -10  -8   0 12.6877 4.98999   2
  10   8   0 8.79758 3.32328  11
  10   8   0 12.1297 3.47908   7
  10   8   0 9.13201 3.56283   2
  10   8   0 13.3370 4.97107  10
  10   8   0 9.13647 2.83411   8
  10   8   0 4.00126 3.39153   4
  10   8   0 11.7225 9.72245   1
 -11  -8   0 -0.3060 1.59655   6
 -11  -8   0 5.25006 2.49125   9
 -11  -8   0 1.95656 2.25252   2
 -11  -8   0 0.82643 2.44811   4
  11   8   0 -0.0687 2.16526   7
  11   8   0 1.42665 1.92400   8
  11   8   0 7.03867 3.16887   2
  11   8   0 -1.3125 1.95391  11
 -12  -8   0 88.3034 7.46248   6
 -12  -8   0 97.2615 8.98334   4
 -12  -8   0 87.6970 8.82000   2
 -12  -8   0 99.4810 8.48229   9
  12   8   0 93.1974 6.45828   8
  12   8   0 96.4925 8.95859  11
  12   8   0 85.8613 9.35032   2
 -13  -8   0 63.3652 6.47667   6
 -13  -8   0 68.7619 7.72723   9
 -13  -8   0 73.6967 8.45141   4
  13   8   0 63.0092 8.05539  11
  13   8   0 56.7741 8.89611   2
  13   8   0 60.8409 5.33541   8
 -14  -8   0 292.928 16.1325   9
 -14  -8   0 272.996 13.9276   6
  14   8   0 254.108 17.7629   2
  14   8   0 266.747 16.5539  11
  14   8   0 246.309 10.9072   8
 -15  -8   0 4.65529 3.57222   4
 -15  -8   0 5.70470 3.67266   9
 -15  -8   0 3.90257 2.81363   6
  15   8   0 9.54349 5.50704   2
  15   8   0 0.87971 3.79123  11
 -16  -8   0 32.8739 7.76864   6
 -16  -8   0 16.1200 5.64896   4
 -16  -8   0 25.4354 6.17817   9
  16   8   0 16.6767 7.27733   2
  16   8   0 16.9522 5.95193  11
 -17  -8   0 22.1837 5.15379   6
 -17  -8   0 20.6838 6.64917   4
 -17  -8   0 20.3238 5.69866   9
  17   8   0 15.8708 9.96644   2
  17   8   0 12.3501 6.02977  11
 -11   9   0 70.8114 8.81909   9
 -11   9   0 68.2432 6.13046   4
 -11   9   0 71.1243 9.76971   5
 -11   9   0 48.6713 11.8811  10
  10  -9   0 33.3570 5.03355   3
 -10   9   0 34.7620 4.84949   8
 -10   9   0 15.4334 4.77607   9
 -10   9   0 23.6330 7.06011   8
 -10   9   0 20.5374 5.95246   5
 -10   9   0 26.7677 7.46132  10
   9  -9   0 11.9937 3.46882   3
  -9   9   0 10.6991 3.70700   9
  -9   9   0 12.7210 4.09584   8
  -9   9   0 6.56233 2.37393   4
   8  -9   0 82.7785 7.46698   3
  -8   9   0 84.6890 10.5677  10
  -8   9   0 114.378 10.2583   5
  -8   9   0 95.2990 7.78019   8
  -8   9   0 104.046 5.98459   4
  -8   9   0 84.6247 7.90520   9
   7  -9   0 5.95217 3.70516   3
  -7   9   0 5.19447 2.52899   9
  -7   9   0 -0.0380 2.79344   8
  -7   9   0 1.68790 2.80802   5
  -7   9   0 4.48374 2.64264   3
  -7   9   0 -1.1394 1.36634   4
  -7   9   0 1.93512 2.51459  10
   6  -9   0 62.0659 5.42941   3
  -6   9   0 52.6801 3.86522   4
  -6   9   0 51.5079 9.06689  10
  -6   9   0 54.6016 6.77938   5
  -6   9   0 55.0623 5.39749   7
  -6   9   0 48.0520 5.82159   8
  -6   9   0 44.6640 7.01977   3
  -6   9   0 54.9387 5.71264   9
  -6   9   0 58.2665 4.20202   7
   5  -9   0 72.6716 5.97987   3
  -5   9   0 74.2614 5.99303   9
  -5   9   0 65.6077 4.04349   4
  -5   9   0 74.8665 9.63200  10
  -5   9   0 70.1395 8.18876   3
  -5   9   0 64.0795 7.06839  11
  -5   9   0 79.1513 7.44465   5
  -5   9   0 68.9875 5.75745   7
  -5   9   0 70.9613 5.90726   7
   4  -9   0 154.246 8.41161   3
  -4   9   0 142.015 9.81262   5
  -4   9   0 153.022 5.98210   4
  -4   9   0 145.814 7.46487   7
  -4   9   0 146.311 12.3894  10
  -4   9   0 153.278 7.96397   9
  -4   9   0 170.078 10.3014  11
  -4   9   0 149.236 10.2142   3
   3  -9   0 1262.44 30.9994   6
  -3   9   0 1259.19 41.8534  10
  -3   9   0 1257.58 36.3174   3
  -3   9   0 1273.68 33.9365   7
  -3   9   0 1309.08 30.4846   4
  -3   9   0 1211.21 41.8249   5
  -3   9   0 1317.63 33.1567   9
   2  -9   0 421.032 12.8569   6
  -2   9   0 418.540 17.2103   5
  -2   9   0 408.321 19.7270   1
  -2   9   0 426.948 11.8250   4
  -2   9   0 426.693 19.8677  10
  -2   9   0 419.010 12.3602   4
  -2   9   0 432.298 13.0752   9
  -2   9   0 393.846 24.1263   1
  -2   9   0 409.549 15.6445   3
   1  -9   0 148.164 6.68481   6
   1  -9   0 145.034 7.72445   5
  -1   9   0 160.516 14.7616   1
  -1   9   0 136.390 7.82972   3
  -1   9   0 142.177 5.45362   9
  -1   9   0 142.222 10.2379  10
  -1   9   0 138.738 9.01402   5
  -1   9   0 130.994 15.3786   1
  -1   9   0 129.981 8.91195   2
  -1   9   0 139.098 7.23116   6
  -1   9   0 145.440 5.78674   4
   0  -9   0 193.787 8.15529   6
   0  -9   0 198.661 8.76935   5
   0   9   0 171.642 14.5372   1
   0   9   0 187.544 7.77891   6
   0   9   0 193.178 7.12995   4
   0   9   0 191.389 10.5912   2
   0   9   0 183.003 9.09205   3
   0   9   0 186.068 9.24583   7
   0   9   0 180.699 10.6458   5
   0   9   0 169.467 14.9888   1
   0   9   0 186.737 11.2654  10
  -1  -9   0 210.779 11.2476  10
  -1  -9   0 182.250 12.9085   5
  -1  -9   0 205.187 8.69626   6
   1   9   0 198.330 9.76046   7
   1   9   0 181.355 15.0864   1
   1   9   0 192.249 7.51788   4
   1   9   0 194.941 11.0439  10
   1   9   0 203.358 10.7675   5
   1   9   0 212.728 17.0079   1
   1   9   0 195.100 8.23047   6
   1   9   0 199.257 9.56479   3
   1   9   0 196.790 10.7582   2
  -2  -9   0 25.0874 3.22894   6
  -2  -9   0 28.2241 3.23506   5
  -2  -9   0 30.4386 4.15458  10
   2   9   0 23.4832 5.40225   2
   2   9   0 22.9317 3.44956   7
   2   9   0 23.9685 3.44855   3
   2   9   0 27.0069 7.48042   1
   2   9   0 26.6159 7.43161   1
   2   9   0 34.0511 5.68353  10
   2   9   0 23.1226 2.62674   4
   2   9   0 20.3132 2.74407   6
   2   9   0 31.2488 3.80295   5
  -3  -9   0 120.216 6.91768   6
  -3  -9   0 132.094 7.06249   5
  -3  -9   0 137.864 8.40248  10
   3   9   0 114.031 7.27176   3
   3   9   0 121.890 7.78841   7
   3   9   0 125.885 7.61618   4
   3   9   0 129.351 6.84641   6
   3   9   0 122.551 8.43284  10
   3   9   0 133.642 14.5452   1
   3   9   0 123.673 13.4386   1
   3   9   0 141.611 7.57992   5
   3   9   0 129.916 6.97379  11
   3   9   0 124.048 13.4192   2
  -4  -9   0 44.6539 4.89568  10
  -4  -9   0 45.9181 4.58072   4
  -4  -9   0 45.7770 4.59930   5
  -4  -9   0 46.0875 4.43011   6
   4   9   0 49.9680 4.51491   5
   4   9   0 44.3361 4.10866   6
   4   9   0 47.2462 5.37173  10
   4   9   0 48.9323 11.8377   1
   4   9   0 50.9355 5.03209   7
   4   9   0 56.1692 7.10682   2
   4   9   0 43.4233 4.61193   3
   4   9   0 47.3912 10.3095   1
   4   9   0 49.4252 4.01474   4
   4   9   0 49.5146 4.34470  11
  -5  -9   0 1289.35 36.5381   6
  -5  -9   0 1354.20 36.4854   4
  -5  -9   0 1301.27 37.6703  10
  -5  -9   0 1323.26 31.2978   9
  -5  -9   0 1340.91 37.5721   2
  -5  -9   0 1289.34 39.2047   5
   5   9   0 1360.32 58.9534   1
   5   9   0 1308.52 54.8987   1
   5   9   0 1323.37 38.4838   2
   5   9   0 1349.09 35.4166  11
   5   9   0 1300.49 37.4194   7
   5   9   0 1286.25 35.2079   6
   5   9   0 1309.76 35.0966   4
  -6  -9   0 401.066 15.2482   6
  -6  -9   0 380.401 16.3462  10
  -6  -9   0 401.664 15.6046   4
  -6  -9   0 399.590 12.3146   9
  -6  -9   0 393.643 16.0279   2
  -6  -9   0 396.802 15.2641   5
   6   9   0 391.621 14.7736   6
   6   9   0 401.053 17.4820  10
   6   9   0 396.137 16.1953   7
   6   9   0 404.308 17.2010   2
   6   9   0 397.563 14.8265  11
   6   9   0 397.246 14.8023   4
   6   9   0 390.437 30.1993   1
  -7  -9   0 181.793 10.2088   2
  -7  -9   0 174.605 9.52283   6
  -7  -9   0 185.334 10.1628   4
  -7  -9   0 166.903 10.4239  10
  -7  -9   0 177.631 10.0054   5
  -7  -9   0 182.060 7.96114   9
   7   9   0 165.127 9.87227   7
   7   9   0 165.201 9.17169   4
   7   9   0 184.681 9.73996   6
   7   9   0 189.779 11.9069  10
   7   9   0 181.409 9.68142  11
   7   9   0 172.119 20.1691   1
   7   9   0 185.919 11.2872   2
  -8  -9   0 4.53902 5.82776   1
  -8  -9   0 5.63451 2.51365   4
  -8  -9   0 2.02641 1.56555   9
  -8  -9   0 5.60827 2.45073  10
  -8  -9   0 8.64870 3.17870   5
  -8  -9   0 1.80156 1.83336   6
  -8  -9   0 5.51470 2.16880  11
  -8  -9   0 5.35269 2.66799   2
   8   9   0 5.99123 2.40784   4
   8   9   0 7.11984 2.26887   6
   8   9   0 3.14779 2.07811  11
   8   9   0 14.5006 7.85919   1
   8   9   0 8.11967 3.49830  10
   8   9   0 8.95780 2.75280   7
   8   9   0 4.63697 2.40385   2
  -9  -9   0 297.297 15.5049  10
  -9  -9   0 295.991 13.6027   6
  -9  -9   0 304.944 14.4387  11
  -9  -9   0 301.018 14.5195   2
  -9  -9   0 305.690 15.0798   5
  -9  -9   0 330.144 32.2172   1
  -9  -9   0 324.040 13.0856   9
  -9  -9   0 314.064 15.1190   4
   9   9   0 289.664 28.8164   1
   9   9   0 322.014 14.5690  11
   9   9   0 316.636 14.6372   7
   9   9   0 302.140 14.0382   4
   9   9   0 308.545 16.9113  10
   9   9   0 331.837 16.3220   2
   9   9   0 308.116 13.5641   6
 -10  -9   0 22.1468 4.58879   4
 -10  -9   0 19.5947 4.65174  11
 -10  -9   0 25.2771 4.65143   2
 -10  -9   0 18.8264 12.4993   1
 -10  -9   0 24.4306 4.27881   9
 -10  -9   0 19.0144 4.92308   5
 -10  -9   0 18.0711 4.06468   6
  10   9   0 21.6136 4.72060   7
  10   9   0 17.5148 4.35623  11
  10   9   0 25.7991 5.63761   2
  10   9   0 20.8099 5.43764  10
  10   9   0 22.1590 4.18594   8
  10   9   0 25.5015 10.7385   1
 -11  -9   0 -3.3804 2.01683   2
 -11  -9   0 3.24025 2.55901   9
 -11  -9   0 2.35217 2.40888   4
 -11  -9   0 -0.1872 1.68444   6
 -11  -9   0 3.74813 3.18414   5
  11   9   0 7.70616 3.67648  10
  11   9   0 1.21187 2.22793  11
  11   9   0 2.49257 2.24397   2
  11   9   0 -1.1011 1.67695   8
 -12  -9   0 1.54825 2.26703   6
 -12  -9   0 2.28540 2.36442   9
 -12  -9   0 3.22900 2.69040   4
  12   9   0 -2.2254 2.47427   2
  12   9   0 0.20002 2.19024   8
  12   9   0 8.06173 3.27082  11
 -13  -9   0 532.847 21.8833   9
 -13  -9   0 523.822 20.8176   6
 -13  -9   0 519.399 23.5874   4
  13   9   0 530.737 23.3413  11
  13   9   0 501.494 24.4618   2
  13   9   0 509.198 24.9368   8
 -14  -9   0 53.2139 6.37356   6
 -14  -9   0 39.9381 7.76026   4
 -14  -9   0 39.8848 7.24678   9
  14   9   0 44.8031 5.70270   8
  14   9   0 66.1538 8.19247  11
  14   9   0 47.5695 8.98456   2
 -15  -9   0 326.832 27.5481   9
 -15  -9   0 411.420 21.6904   4
 -15  -9   0 404.912 18.1645   6
  15   9   0 355.295 22.3456   2
  15   9   0 393.029 21.2466  11
  15   9   0 380.508 14.6201   8
 -16  -9   0 -2.3897 2.31417   6
 -16  -9   0 4.71178 3.43549   4
 -16  -9   0 -0.1870 3.23429   9
  16   9   0 1.81680 3.32719  11
  16   9   0 0.40044 5.46428   2
 -17  -9   0 97.0061 10.9987   9
 -17  -9   0 98.2906 9.15369   6
 -17  -9   0 78.2595 10.5179   4
  17   9   0 69.1328 13.4256   2
  17   9   0 88.3561 11.6730  11
 -10  10   0 13.4099 5.86865  10
 -10  10   0 6.18993 4.44546   5
 -10  10   0 4.42879 3.39692   8
  -9  10   0 15.4547 3.53971   8
  -9  10   0 17.5930 4.82676   9
  -9  10   0 8.26958 5.52209   8
  -9  10   0 18.8556 6.50313  10
  -9  10   0 19.0354 5.13107   5
  -8  10   0 38.5219 5.98348   8
  -8  10   0 33.7522 5.78266   9
  -8  10   0 26.1620 9.59283  10
  -8  10   0 32.6423 6.71059   5
  -7  10   0 52.5109 7.06839   3
  -7  10   0 52.1349 9.62651  10
  -7  10   0 63.5788 6.53808   9
  -7  10   0 53.1403 7.54923   5
  -7  10   0 60.1702 7.12049   8
  -6  10   0 28.0254 6.08455   3
  -6  10   0 31.1725 5.12384   8
  -6  10   0 27.2715 5.86623   5
  -6  10   0 36.6174 7.33501  10
  -6  10   0 28.1041 4.80114   9
  -6  10   0 26.2620 4.72933   7
  -5  10   0 -4.7445 2.23801  10
  -5  10   0 -2.4589 3.60928   3
  -5  10   0 1.36882 2.71921  11
  -5  10   0 1.62033 1.77518   9
  -5  10   0 1.95543 2.25045   5
  -5  10   0 1.02462 1.77560   7
  -5  10   0 4.30543 2.43832   7
  -4  10   0 28.4418 6.75547  10
  -4  10   0 36.3931 6.41286   3
  -4  10   0 44.3951 5.90564  11
  -4  10   0 38.8684 4.40676   7
  -4  10   0 36.3540 6.27128   5
  -4  10   0 42.9803 4.46329   9
   3 -10   0 126.989 5.86877   6
  -3  10   0 111.774 8.48307   3
  -3  10   0 135.928 11.7255  10
  -3  10   0 117.925 7.28944   7
  -3  10   0 130.319 6.80057   9
  -3  10   0 138.805 9.91319   5
   2 -10   0 294.468 10.2397   6
  -2  10   0 287.765 14.5769   2
  -2  10   0 286.699 12.1376   7
  -2  10   0 293.381 15.6165   5
  -2  10   0 266.540 20.2189   1
  -2  10   0 306.879 16.8735  10
  -2  10   0 291.672 9.98702   9
  -2  10   0 283.004 16.3283   1
  -2  10   0 279.840 12.8785   3
   1 -10   0 8.92128 2.12244   6
  -1  10   0 4.15277 1.97787   7
  -1  10   0 4.99534 2.71949   2
  -1  10   0 3.59588 3.01526  10
  -1  10   0 9.83826 6.60079   1
  -1  10   0 1.61051 2.45214   5
  -1  10   0 8.03257 1.59386   4
  -1  10   0 -2.3054 2.73563   1
  -1  10   0 1.36085 1.87651   3
   0 -10   0 8.13567 2.09432   5
   0 -10   0 4.52852 1.82167   6
   0  10   0 4.40774 3.01912   1
   0  10   0 7.46017 3.07223  10
   0  10   0 5.35639 3.21192   5
   0  10   0 2.65869 2.09153   2
   0  10   0 3.88139 1.33377   4
   0  10   0 6.19038 2.37546   3
   0  10   0 6.69131 1.78532   6
   0  10   0 3.38649 4.25857   1
   0  10   0 4.28566 1.73943   7
  -1 -10   0 65.2530 5.01697   6
  -1 -10   0 60.0042 4.94251   5
  -1 -10   0 59.3735 6.75789  10
   1  10   0 64.7368 10.1079   1
   1  10   0 72.9853 4.91767   6
   1  10   0 69.6109 5.71820   7
   1  10   0 76.7827 5.86213   3
   1  10   0 66.3362 6.57483   5
   1  10   0 75.7974 7.20837  10
   1  10   0 70.5761 4.27493   4
   1  10   0 63.1652 9.48320   1
   1  10   0 67.9735 6.66719   2
  -2 -10   0 336.000 12.4643   5
  -2 -10   0 344.202 12.9435   6
  -2 -10   0 345.350 15.5513  10
   2  10   0 372.452 24.4572   1
   2  10   0 302.088 21.5717   1
   2  10   0 340.710 15.5448  10
   2  10   0 332.297 11.5266   4
   2  10   0 341.907 15.4900   2
   2  10   0 328.739 14.1426   7
   2  10   0 340.392 13.9293   3
   2  10   0 340.482 14.2943   5
   2  10   0 324.582 12.2916   6
  -3 -10   0 0.30337 1.75239  10
  -3 -10   0 1.26324 1.56571   6
   3  10   0 0.86615 1.12202   4
   3  10   0 1.38384 2.01016  10
   3  10   0 -6.3106 3.18802   1
   3  10   0 4.48315 2.04774   7
   3  10   0 0.88247 1.61770  11
   3  10   0 1.56998 1.24146   6
   3  10   0 4.95862 2.01555   5
   3  10   0 1.77703 1.81840   2
   3  10   0 -0.5535 1.29638   3
  -4 -10   0 20.3946 3.65152   6
  -4 -10   0 19.7893 4.18293  10
   4  10   0 20.4490 4.48616  10
   4  10   0 21.4039 2.90800   4
   4  10   0 20.4652 4.06918   7
   4  10   0 26.9811 4.39715   3
   4  10   0 24.2869 3.86068  11
   4  10   0 27.7913 3.39916   6
   4  10   0 23.6346 3.50701   5
   4  10   0 24.0909 4.60790   2
   4  10   0 28.7493 8.73916   1
   4  10   0 27.7456 7.87883   1
  -5 -10   0 111.425 7.24368   6
  -5 -10   0 101.598 7.11104   5
  -5 -10   0 112.073 7.55679   4
  -5 -10   0 109.899 8.00322  10
   5  10   0 102.496 6.74124   6
   5  10   0 117.041 14.4927   1
   5  10   0 99.6123 7.40962   3
   5  10   0 109.223 15.7092   1
   5  10   0 102.497 8.43452   2
   5  10   0 105.069 7.86238   7
   5  10   0 99.1262 6.37267   4
   5  10   0 116.371 9.03891  10
   5  10   0 105.323 6.84560  11
  -6 -10   0 524.734 18.8734   5
  -6 -10   0 525.669 27.6133   2
  -6 -10   0 539.124 20.7531  10
  -6 -10   0 525.243 18.7154   6
  -6 -10   0 519.703 14.7171   9
  -6 -10   0 520.091 19.8235   4
   6  10   0 541.963 21.6100  10
   6  10   0 505.034 35.9623   1
   6  10   0 556.210 34.7235   1
   6  10   0 514.662 20.2823   7
   6  10   0 536.859 18.4163  11
   6  10   0 483.454 17.6837   4
   6  10   0 517.164 20.9154   2
  -7 -10   0 1.83438 2.11938  10
  -7 -10   0 4.73953 2.24885   6
  -7 -10   0 4.04168 2.29025   5
  -7 -10   0 7.45606 2.68166   4
  -7 -10   0 7.81856 2.71338   2
  -7 -10   0 6.07470 1.84218   9
   7  10   0 -4.4196 5.17074   1
   7  10   0 7.27092 2.25372   6
   7  10   0 6.00085 2.10179   4
   7  10   0 5.07695 2.73221  10
   7  10   0 7.71696 2.70979  11
   7  10   0 10.7432 3.22183   2
   7  10   0 3.00224 4.77975   1
   7  10   0 7.28027 2.39322   7
  -8 -10   0 312.270 14.5735   5
  -8 -10   0 300.191 14.6529   2
  -8 -10   0 332.608 15.2204   4
  -8 -10   0 312.363 14.0833   6
  -8 -10   0 335.347 12.1605   9
  -8 -10   0 299.449 15.2098  10
   8  10   0 342.663 17.3634  10
   8  10   0 298.005 13.5363   6
   8  10   0 331.501 14.3714  11
   8  10   0 310.466 14.9275   7
   8  10   0 337.204 30.5807   1
   8  10   0 311.990 15.8931   2
   8  10   0 316.962 13.9983   4
  -9 -10   0 1.96795 1.99121   2
  -9 -10   0 1.81187 2.32224   4
  -9 -10   0 4.50464 2.41210   6
  -9 -10   0 4.09989 2.04699   9
  -9 -10   0 3.28822 2.75806   5
  -9 -10   0 1.73972 2.31460  11
   9  10   0 3.61290 2.03021  11
   9  10   0 1.39483 2.05922   4
   9  10   0 0.44796 2.07507   2
   9  10   0 5.59103 7.63549   1
   9  10   0 1.99752 2.28776  10
 -10 -10   0 180.461 10.8089   6
 -10 -10   0 200.268 11.4467  11
 -10 -10   0 190.082 12.1311   4
 -10 -10   0 181.410 12.0317   5
 -10 -10   0 178.561 16.9122   2
 -10 -10   0 197.161 10.3050   9
  10  10   0 193.810 12.9488   2
  10  10   0 200.894 10.8226   8
  10  10   0 217.780 12.2338  11
  10  10   0 193.901 13.9624  10
 -11 -10   0 87.2762 8.56711   4
 -11 -10   0 94.1616 7.94418   6
 -11 -10   0 79.5594 8.66051   5
 -11 -10   0 82.5393 7.10500   9
  11  10   0 79.1381 6.90787   8
  11  10   0 84.3865 8.84058   2
  11  10   0 84.8186 10.1132  10
  11  10   0 86.0265 8.16885  11
 -12 -10   0 1.56264 2.30102   4
 -12 -10   0 -2.0967 1.98893   6
 -12 -10   0 1.29090 2.35594   9
  12  10   0 2.26240 1.98379   8
  12  10   0 4.44208 3.68079   2
  12  10   0 3.19799 2.93425  11
  12  10   0 7.30356 3.80335  10
 -13 -10   0 0.79712 2.55299   4
 -13 -10   0 1.43962 2.50555   6
 -13 -10   0 -3.5308 1.87007   9
  13  10   0 -5.3928 2.32530   2
  13  10   0 -3.3268 2.30514  11
  13  10   0 0.00300 2.20694   8
 -14 -10   0 88.4563 8.73667   9
 -14 -10   0 85.0654 9.80883   4
 -14 -10   0 74.0363 7.47630   6
  14  10   0 58.8750 6.67495   8
  14  10   0 71.7508 8.98518  11
  14  10   0 50.4333 9.35888   2
 -15 -10   0 5.19982 4.29051   9
 -15 -10   0 2.69317 3.08362   6
 -15 -10   0 4.58822 4.06983   4
  15  10   0 9.28417 3.33709   8
  15  10   0 12.6029 4.67609  11
  15  10   0 4.45090 5.34742   2
 -16 -10   0 -3.4861 3.05830   9
 -16 -10   0 7.92492 3.47461   6
 -16 -10   0 3.00440 3.20741   4
  16  10   0 4.43644 3.84241  11
  16  10   0 -1.9231 6.08319   2
 -17 -10   0 11.6748 5.12497   9
 -17 -10   0 15.2525 4.58396   6
 -17 -10   0 9.70924 4.55268   4
  17  10   0 6.95838 4.52480  11
  17  10   0 5.06030 6.34359   2
  -9  11   0 -2.5592 3.53569  10
  -9  11   0 8.31301 4.17358   5
  -9  11   0 2.22836 2.94750   8
  -9  11   0 -2.7958 2.33721   9
  -8  11   0 36.4728 8.29777  10
  -8  11   0 22.8909 4.97944   9
  -8  11   0 25.1852 6.54758   5
  -7  11   0 37.5213 7.10328   5
  -7  11   0 31.9932 7.96725  10
  -7  11   0 15.3170 9.38432   3
  -7  11   0 47.8100 6.17051   9
  -6  11   0 250.207 12.0728   7
  -6  11   0 259.932 15.6641   5
  -6  11   0 244.479 17.5087   3
  -6  11   0 231.689 17.0478  10
  -6  11   0 266.205 12.7730   9
  -6  11   0 246.381 9.79995   7
  -5  11   0 18.2212 3.16420   7
  -5  11   0 18.9401 7.11361  10
  -5  11   0 21.4770 5.00834   9
  -5  11   0 24.5491 4.74675   7
  -5  11   0 24.0032 5.51780   5
  -5  11   0 24.6351 6.38579   3
  -4  11   0 98.9697 9.21908   5
  -4  11   0 100.491 9.36774   3
  -4  11   0 121.892 11.7175  10
  -4  11   0 103.257 6.76593   9
  -4  11   0 100.414 6.88534   7
  -4  11   0 96.2731 8.80944  11
   3 -11   0 111.291 5.81789   6
  -3  11   0 114.529 9.40452   2
  -3  11   0 111.995 8.91090   3
  -3  11   0 104.095 7.06765   7
  -3  11   0 102.425 11.0153  10
  -3  11   0 126.786 9.70649  11
  -3  11   0 121.463 10.0519   5
  -3  11   0 115.000 6.37606   9
   2 -11   0 75.1633 5.05979   6
  -2  11   0 90.4193 7.27981   3
  -2  11   0 78.9904 8.04411   2
  -2  11   0 79.9791 4.62182   9
  -2  11   0 77.3493 8.13375   5
  -2  11   0 79.3435 6.14470   7
  -2  11   0 80.7321 9.07846  10
   1 -11   0 0.61625 1.62165   6
  -1  11   0 2.50267 2.51269   2
  -1  11   0 5.20781 3.44868  10
  -1  11   0 1.96877 2.04696   7
  -1  11   0 5.72802 3.38575   5
  -1  11   0 3.08606 2.28712   3
  -1  11   0 8.31727 6.64389   1
  -1  11   0 1.22048 3.99217   1
   0 -11   0 129.887 7.61920   5
   0 -11   0 128.885 7.05002   6
   0  11   0 138.745 8.28561   3
   0  11   0 127.978 8.13181   7
   0  11   0 122.080 9.50252   2
   0  11   0 107.632 12.7796   1
   0  11   0 103.140 14.0328   1
   0  11   0 124.823 10.0426  10
   0  11   0 120.670 5.57863   4
   0  11   0 109.807 9.44806   5
  -1 -11   0 43.5402 4.41754   6
  -1 -11   0 36.9572 4.15585   5
  -1 -11   0 31.7027 7.17194  10
   1  11   0 38.9607 4.53529   3
   1  11   0 40.9457 5.87516  10
   1  11   0 34.2027 9.14466   1
   1  11   0 34.5349 3.62551   6
   1  11   0 38.2959 6.46954   5
   1  11   0 40.8173 10.7595   1
   1  11   0 35.3943 3.15445   4
   1  11   0 26.7554 4.11189   7
   1  11   0 36.7682 5.51851   2
  -2 -11   0 529.862 17.5732   5
   2  11   0 568.036 20.3624   5
   2  11   0 540.707 21.8286  10
   2  11   0 522.825 17.5854   6
   2  11   0 521.214 19.2831   3
   2  11   0 538.436 19.8014   7
   2  11   0 546.038 19.2840   4
   2  11   0 551.535 21.6770   2
   2  11   0 526.270 31.4790   1
  -3 -11   0 1087.74 30.8210   6
  -3 -11   0 1092.21 29.7719   5
  -3 -11   0 1094.41 38.2629  10
   3  11   0 1032.14 47.0985   1
   3  11   0 1061.96 34.4688  10
   3  11   0 1086.32 34.5328   2
   3  11   0 1052.53 30.1733   6
   3  11   0 1067.05 49.7437   1
   3  11   0 1043.46 28.6959   4
   3  11   0 1087.29 31.6605   5
   3  11   0 1064.87 30.4822  11
  -4 -11   0 178.678 9.06379   5
  -4 -11   0 185.438 9.77195   6
   4  11   0 180.574 9.22843  11
   4  11   0 187.841 10.7181   7
   4  11   0 170.155 10.0100   3
   4  11   0 189.527 11.8698  10
   4  11   0 184.389 11.7135   2
   4  11   0 198.015 19.0866   1
   4  11   0 178.022 8.50625   4
   4  11   0 171.403 9.03484   6
   4  11   0 184.012 9.79550   5
   4  11   0 184.096 20.0712   1
  -5 -11   0 602.577 20.3572   5
  -5 -11   0 598.960 21.0762   4
  -5 -11   0 578.871 20.3567   6
  -5 -11   0 594.151 22.3840  10
   5  11   0 570.893 21.1587   3
   5  11   0 602.703 19.8365  11
   5  11   0 613.503 39.0033   1
   5  11   0 570.650 22.9956   2
   5  11   0 578.635 35.2970   1
   5  11   0 615.023 23.7160  10
   5  11   0 563.934 21.6778   7
   5  11   0 577.549 19.1351   4
   5  11   0 589.591 20.0482   6
  -6 -11   0 69.4214 6.35929   5
  -6 -11   0 69.1305 6.62496   4
  -6 -11   0 69.6980 7.04993  10
  -6 -11   0 81.3213 6.74765   6
   6  11   0 84.3152 13.5295   1
   6  11   0 79.3031 6.94132   3
   6  11   0 78.2692 6.90878   7
   6  11   0 82.2185 6.34487  11
   6  11   0 75.4750 17.0046   1
   6  11   0 71.9245 5.98089   6
   6  11   0 83.8005 8.31685  10
   6  11   0 75.5057 7.56365   2
   6  11   0 81.8232 6.04037   4
  -7 -11   0 33.3724 4.63733   2
  -7 -11   0 23.8541 4.82418  10
  -7 -11   0 32.2342 2.99961   9
  -7 -11   0 26.8898 4.90475   5
  -7 -11   0 33.0816 4.67900   6
  -7 -11   0 27.5602 4.97860   4
   7  11   0 24.8774 5.59322   2
   7  11   0 27.5884 4.54760   4
   7  11   0 31.5246 4.23517  11
   7  11   0 18.3008 9.56286   1
   7  11   0 33.9528 11.9198   1
   7  11   0 27.9555 4.10610   6
   7  11   0 28.6845 6.24989  10
   7  11   0 32.3320 6.49494   7
  -8 -11   0 29.8920 3.45989   9
  -8 -11   0 32.1110 5.59670   5
  -8 -11   0 32.2125 6.46487   2
  -8 -11   0 27.6385 4.91720   6
  -8 -11   0 35.2574 5.16559   4
   8  11   0 49.0585 15.0573   1
   8  11   0 31.4624 6.68185   2
   8  11   0 33.8087 5.47328  11
   8  11   0 35.7402 11.7289   1
   8  11   0 31.6085 6.84159  10
   8  11   0 35.1991 4.56169   4
  -9 -11   0 65.7930 6.92326   4
  -9 -11   0 70.8208 6.77844   6
  -9 -11   0 71.0949 5.49742   9
  -9 -11   0 60.4090 6.87345   5
   9  11   0 64.8144 7.61175   2
   9  11   0 71.4334 8.49503  10
   9  11   0 61.5780 6.50120  11
 -10 -11   0 105.664 9.07046   9
 -10 -11   0 103.558 9.20731   4
 -10 -11   0 91.4013 8.89821   5
 -10 -11   0 110.713 8.74102   6
  10  11   0 106.038 8.67878  11
  10  11   0 109.127 10.8212  10
  10  11   0 104.655 9.83651   2
 -11 -11   0 824.498 30.0261   4
 -11 -11   0 739.870 28.7875   5
 -11 -11   0 820.970 28.0185   6
 -11 -11   0 779.800 25.8648   9
  11  11   0 801.647 33.2340  10
  11  11   0 833.451 27.2647   8
  11  11   0 798.278 28.6446  11
  11  11   0 802.341 31.0972   2
 -12 -11   0 58.2581 7.92142   4
 -12 -11   0 63.6502 7.19060   6
 -12 -11   0 68.6833 6.91681   9
  12  11   0 68.9297 6.98754   8
  12  11   0 62.0212 7.39728  11
  12  11   0 64.3030 8.95112   2
  12  11   0 72.6275 9.77161  10
 -13 -11   0 87.1388 8.21933   9
 -13 -11   0 87.0119 10.3889   4
 -13 -11   0 91.5606 8.43451   6
  13  11   0 89.4120 8.93566  11
  13  11   0 101.577 8.21908   8
  13  11   0 79.8183 9.83891   2
 -14 -11   0 2.20444 2.47252   6
 -14 -11   0 0.00748 2.87242   4
 -14 -11   0 1.11137 2.86987   9
  14  11   0 3.36472 3.54640   2
  14  11   0 0.90118 2.68782   8
  14  11   0 -2.3033 5.05242  11
 -15 -11   0 51.0522 8.93145   4
 -15 -11   0 55.4083 6.74931   6
 -15 -11   0 35.1624 7.09131   9
  15  11   0 43.1188 10.9559   2
  15  11   0 50.2074 6.21616   8
  15  11   0 32.9228 6.80899  11
 -16 -11   0 8.57074 4.15588   4
 -16 -11   0 5.13092 3.26071   6
 -16 -11   0 1.46198 3.44652   9
  16  11   0 0.70909 3.05537   8
  16  11   0 6.16674 7.24387   2
  16  11   0 0.67635 3.34494  11
 -17 -11   0 3.40812 4.45720   4
 -17 -11   0 9.36458 4.18185   9
 -17 -11   0 9.94490 3.90297   6
  17  11   0 10.6985 4.41558  11
  17  11   0 7.32320 6.00627   2
  -9  12   0 26.8254 7.33619  10
  -9  12   0 14.4423 5.52144   5
  -8  12   0 17.2745 4.41955   9
  -8  12   0 27.1161 7.23247  10
  -8  12   0 30.8802 6.63277   5
  -7  12   0 -9.0092 4.43503  10
  -7  12   0 2.46223 2.70648   9
  -7  12   0 0.50712 4.11824   3
  -6  12   0 37.4857 5.27773   9
  -6  12   0 41.4878 11.9690  10
  -6  12   0 37.7987 4.52800   7
  -6  12   0 52.9707 7.32371   2
  -6  12   0 35.5725 7.49054   3
  -6  12   0 31.2926 7.11156   5
  -6  12   0 35.4206 5.82920   7
  -5  12   0 240.683 17.7656  10
  -5  12   0 241.148 15.4771   5
  -5  12   0 250.191 15.5481   2
  -5  12   0 235.639 10.6703   7
  -5  12   0 238.365 16.0496   3
  -5  12   0 249.643 12.3303   7
  -4  12   0 -4.1108 2.12272   7
  -4  12   0 6.51385 3.56324   5
  -4  12   0 -3.2681 2.91510  10
  -4  12   0 1.75607 1.99172   9
  -4  12   0 2.23546 2.50907   2
  -4  12   0 5.54952 4.02038   3
   3 -12   0 6.01034 1.92462   6
  -3  12   0 4.96091 3.85083  10
  -3  12   0 0.31652 2.29511   2
  -3  12   0 7.52170 3.52041   5
  -3  12   0 12.0638 3.91691   3
  -3  12   0 2.74761 1.74012   9
  -3  12   0 8.22608 2.62897   7
   2 -12   0 232.316 9.59301   6
  -2  12   0 232.392 12.7321   3
  -2  12   0 215.409 11.0783   7
  -2  12   0 242.894 15.3200   5
  -2  12   0 225.834 15.5688  10
  -2  12   0 224.347 13.9386   2
   1 -12   0 89.0992 5.74409   6
  -1  12   0 85.3042 9.27983   5
  -1  12   0 86.9783 8.47165   2
  -1  12   0 77.1101 7.32835   7
  -1  12   0 81.6870 8.95627  10
  -1  12   0 73.9667 7.09173   3
   0 -12   0 5.80077 2.28411   6
   0  12   0 2.69718 2.64297   2
   0  12   0 5.53476 1.36164   4
   0  12   0 6.56435 2.40126   3
   0  12   0 1.17789 2.38577  10
   0  12   0 3.57578 2.95601   5
   0  12   0 3.13127 2.57926   7
  -1 -12   0 0.56917 1.62200   6
  -1 -12   0 -0.9325 1.51848   5
   1  12   0 0.29113 1.93716   3
   1  12   0 -1.7716 1.25136   7
   1  12   0 2.76751 2.19597   5
   1  12   0 2.20680 2.51835  10
   1  12   0 0.24251 1.14021   4
   1  12   0 1.26048 2.21529   2
  -2 -12   0 49.3147 4.91529   5
  -2 -12   0 59.4849 5.44220   6
  -2 -12   0 51.3246 7.92119  10
   2  12   0 58.1256 5.86536   7
   2  12   0 44.9286 6.61694  10
   2  12   0 44.7004 3.86288   4
   2  12   0 47.5941 6.54889   2
   2  12   0 48.0424 12.0255   1
   2  12   0 44.2604 4.50179   6
   2  12   0 54.5244 5.64376   3
   2  12   0 59.0834 6.26019   5
   2  12   0 29.4266 13.3950   1
  -3 -12   0 409.635 18.7968  10
  -3 -12   0 450.145 15.5475   5
  -3 -12   0 441.483 16.5094   6
   3  12   0 415.738 17.7073   7
   3  12   0 411.150 28.1376   1
   3  12   0 413.402 14.3674   4
   3  12   0 395.699 29.6210   1
   3  12   0 448.504 17.3962   5
   3  12   0 439.927 19.5985   2
   3  12   0 444.491 19.9093  10
   3  12   0 429.591 17.5798   3
   3  12   0 438.601 16.3943  11
  -4 -12   0 279.729 14.4294  10
  -4 -12   0 280.617 12.7285   6
  -4 -12   0 290.011 11.9239   5
   4  12   0 256.584 13.6118   7
   4  12   0 272.634 12.7126   5
   4  12   0 264.182 14.9747   2
   4  12   0 267.328 12.1980  11
   4  12   0 288.092 25.6075   1
   4  12   0 252.965 22.8509   1
   4  12   0 282.423 15.4350  10
   4  12   0 265.386 13.1478   3
   4  12   0 267.108 11.1347   4
   4  12   0 268.460 12.0606   6
  -5 -12   0 9.51033 3.81867  10
  -5 -12   0 14.5757 3.32611   5
  -5 -12   0 10.3854 3.10138   6
   5  12   0 6.85499 2.42470  11
   5  12   0 13.7434 8.26139   1
   5  12   0 3.14583 2.78543  10
   5  12   0 9.88794 3.54158   2
   5  12   0 11.1241 5.63794   1
   5  12   0 8.74547 2.56367   6
   5  12   0 11.8947 2.75968   4
  -6 -12   0 84.7095 7.50677   4
  -6 -12   0 90.0105 7.38970   5
  -6 -12   0 92.6788 7.42092   6
   6  12   0 101.390 7.38904  11
   6  12   0 92.2366 8.93635   2
   6  12   0 98.2203 6.86320   4
   6  12   0 92.6346 9.23508  10
   6  12   0 102.570 16.6489   1
   6  12   0 96.7445 15.5738   1
  -7 -12   0 78.8465 7.07012   6
  -7 -12   0 84.0080 7.33523   5
  -7 -12   0 69.0128 7.18042   4
   7  12   0 89.2013 7.51629   4
   7  12   0 91.8469 7.21236  11
   7  12   0 94.0249 8.92251   2
   7  12   0 88.6818 9.01918  10
  -8 -12   0 15.4892 4.13547   6
  -8 -12   0 14.4614 4.44806   4
  -8 -12   0 11.2328 3.74305   5
  -8 -12   0 19.9338 2.95608   9
   8  12   0 12.3688 4.18702  10
   8  12   0 16.6131 4.94916   2
   8  12   0 13.4554 3.28175   4
   8  12   0 11.7423 3.57778  11
  -9 -12   0 -0.1462 1.98423   6
  -9 -12   0 2.30308 1.76553   9
  -9 -12   0 3.67133 2.61377   5
   9  12   0 5.92922 3.28328   2
   9  12   0 3.36453 3.11255  10
 -10 -12   0 1.70279 2.46058   4
 -10 -12   0 -1.6891 2.19955   6
 -10 -12   0 -0.2246 1.60854   9
  10  12   0 1.75825 3.17101   2
  10  12   0 -3.2921 3.07217  10
  10  12   0 0.05812 2.06491  11
 -11 -12   0 81.6036 8.24205   6
 -11 -12   0 67.6699 8.28420   5
 -11 -12   0 84.7770 8.97224   4
 -11 -12   0 97.5244 7.35537   9
  11  12   0 80.1400 8.13607  11
  11  12   0 77.4427 9.58926   2
  11  12   0 84.0583 8.02870   8
  11  12   0 98.7389 10.8397  10
 -12 -12   0 238.066 15.1052   4
 -12 -12   0 234.580 12.6349   9
 -12 -12   0 244.976 14.0150   6
  12  12   0 241.653 14.3165  11
  12  12   0 220.539 17.0493  10
  12  12   0 263.062 13.7937   8
  12  12   0 227.436 15.9492   2
 -13 -12   0 8.97682 3.34034   6
 -13 -12   0 3.02440 2.45356   9
 -13 -12   0 4.46520 3.21839   4
  13  12   0 3.87607 2.69614   8
  13  12   0 7.23369 5.99903  10
  13  12   0 -1.0782 3.29255   2
  13  12   0 1.18167 2.55363  11
 -14 -12   0 14.0887 4.38231   4
 -14 -12   0 6.45093 3.14341   6
 -14 -12   0 4.78144 3.54162   9
  14  12   0 12.5125 5.69653   2
  14  12   0 8.73545 3.78595   8
  14  12   0 0.98973 3.17271  11
 -15 -12   0 19.6333 5.72941   9
 -15 -12   0 14.5984 5.37673   4
 -15 -12   0 18.6869 4.48958   6
  15  12   0 25.0185 6.85616  11
  15  12   0 17.7912 4.72937   8
  15  12   0 22.8706 6.82435   2
 -16 -12   0 30.5119 6.69070   9
 -16 -12   0 43.7168 8.54179   4
 -16 -12   0 31.0125 6.19792   6
  16  12   0 30.3949 9.16624   2
  16  12   0 19.5769 5.08141   8
  16  12   0 28.1102 7.30207  11
  -7  13   0 20.6196 4.19610   9
  -7  13   0 28.0130 6.72609   2
  -7  13   0 13.4407 5.64997   5
  -7  13   0 16.8806 5.55984  10
  -6  13   0 23.8016 7.23911  10
  -6  13   0 34.9038 5.76500   7
  -6  13   0 29.7198 4.96876   9
  -6  13   0 25.6838 4.56412   7
  -6  13   0 46.7372 7.39619   2
  -6  13   0 33.6581 7.42108   5
  -5  13   0 -0.8991 2.56300   7
  -5  13   0 2.81011 3.28988   2
  -5  13   0 2.50541 2.54074   9
  -5  13   0 3.39015 3.72279   5
  -5  13   0 6.33971 5.32844  10
  -5  13   0 6.99969 3.26586   7
  -4  13   0 36.5132 4.56605   9
  -4  13   0 37.4375 7.86881  10
  -4  13   0 37.3722 5.26379   7
  -4  13   0 41.4173 7.65369   5
  -4  13   0 34.9402 6.84530   2
   3 -13   0 41.0193 4.55785   6
  -3  13   0 31.1413 4.96912   7
  -3  13   0 55.1108 9.45385   5
  -3  13   0 46.1689 8.96762  10
  -3  13   0 46.8494 7.27855   2
   2 -13   0 3.59744 2.15075   6
  -2  13   0 2.81047 3.65753   5
  -2  13   0 -1.0915 3.65754  10
  -2  13   0 3.95936 2.70411   7
  -2  13   0 2.21468 2.91927   2
  -2  13   0 1.46307 5.51315   3
   1 -13   0 208.497 9.68318   6
  -1  13   0 190.902 11.0919   7
  -1  13   0 218.691 14.9651  10
  -1  13   0 211.721 16.5857   3
  -1  13   0 178.537 14.0139   5
  -1  13   0 223.677 14.3104   2
   0 -13   0 185.772 9.51943   6
   0  13   0 177.702 10.7281   7
   0  13   0 192.705 13.0691   2
   0  13   0 192.227 13.6085  10
   0  13   0 174.958 13.2074   5
  -1 -13   0 3.80807 2.18996   6
  -1 -13   0 5.64338 2.14131   5
   1  13   0 1.97206 3.24052  10
   1  13   0 7.68460 2.95971   7
   1  13   0 6.70765 1.87167   4
   1  13   0 7.12223 3.26264   2
  -2 -13   0 116.290 7.88058   6
  -2 -13   0 115.940 7.32648   5
   2  13   0 116.373 6.27482   4
   2  13   0 123.778 10.4284  10
   2  13   0 123.277 9.46829   5
   2  13   0 116.161 10.2353   2
  -3 -13   0 50.7470 4.99617   5
  -3 -13   0 55.6270 5.75299   6
   3  13   0 49.1602 4.42329   4
   3  13   0 55.0257 6.24611   5
   3  13   0 56.2635 7.27714   2
   3  13   0 62.6581 7.66777  10
   3  13   0 56.2321 5.66948  11
  -4 -13   0 31.3120 4.27716   5
  -4 -13   0 35.5043 4.83457   6
   4  13   0 35.2678 6.71262  10
   4  13   0 41.7791 6.50800   2
   4  13   0 31.3633 4.26340   6
   4  13   0 37.4982 4.78899  11
   4  13   0 41.2882 5.31708   5
   4  13   0 36.4086 4.13097   4
  -5 -13   0 46.3485 5.18402   5
  -5 -13   0 53.7598 5.78907   6
   5  13   0 53.0187 5.07867   4
   5  13   0 53.8430 5.54884  11
   5  13   0 53.8515 7.27074  10
   5  13   0 44.7120 7.12964   2
  -6 -13   0 62.4696 6.54307   6
  -6 -13   0 67.4781 6.23095   5
   6  13   0 64.9633 7.99916  10
   6  13   0 81.6870 8.57209   2
   6  13   0 65.4575 6.23385  11
   6  13   0 65.2133 5.83870   4
  -7 -13   0 255.861 13.1343   5
  -7 -13   0 269.163 13.7402   6
  -7 -13   0 271.442 14.4129   4
   7  13   0 269.824 16.1120  10
   7  13   0 250.279 12.3520   4
   7  13   0 286.704 16.5297   2
   7  13   0 278.950 13.1690  11
  -8 -13   0 291.990 14.8599   6
  -8 -13   0 277.517 14.1186   5
  -8 -13   0 303.783 15.8230   4
   8  13   0 290.205 17.0921   2
   8  13   0 284.916 17.4497  10
   8  13   0 284.924 14.0190  11
  -9 -13   0 107.927 8.98499   6
  -9 -13   0 94.9498 6.08162   9
  -9 -13   0 94.0176 8.64605   5
  -9 -13   0 105.510 9.49805   4
   9  13   0 98.0908 10.3980  10
   9  13   0 102.585 8.31390  11
   9  13   0 102.332 10.0911   2
 -10 -13   0 22.9529 4.96936   6
 -10 -13   0 34.3558 6.69486   4
 -10 -13   0 30.8916 4.14065   9
 -10 -13   0 15.5720 5.08020   5
  10  13   0 24.6606 6.36301   2
  10  13   0 27.6783 5.54632  11
  10  13   0 17.5667 5.99219  10
 -11 -13   0 219.110 14.4913   4
 -11 -13   0 191.221 12.9882   5
 -11 -13   0 200.992 12.8490   6
 -11 -13   0 210.031 10.9480   9
  11  13   0 215.293 13.0961   8
  11  13   0 220.960 15.7012   2
  11  13   0 239.455 13.5579  11
  11  13   0 222.515 16.5597  10
 -12 -13   0 4.09275 3.43010   4
 -12 -13   0 3.97339 2.61978   9
 -12 -13   0 8.98253 3.55449   6
  12  13   0 7.70848 3.42818   8
  12  13   0 9.26221 3.97478  11
  12  13   0 4.06231 3.52304   2
  12  13   0 9.26450 5.03229  10
 -13 -13   0 40.2423 7.88042   4
 -13 -13   0 50.3196 6.39093   9
 -13 -13   0 47.2851 7.43717   6
  13  13   0 49.7557 6.62441   8
  13  13   0 37.7066 7.38059  11
  13  13   0 39.0277 8.93995  10
  13  13   0 31.9086 9.63460   2
 -14 -13   0 22.2447 5.18940   6
 -14 -13   0 13.9033 4.65478   9
 -14 -13   0 19.5258 5.90874   4
  14  13   0 14.4604 4.75324   8
  14  13   0 10.3903 5.12272   2
  14  13   0 6.35646 3.45799  11
 -15 -13   0 1.15791 3.55613   9
 -15 -13   0 3.08726 3.35062   6
 -15 -13   0 9.38482 4.40690   4
  15  13   0 4.05748 4.22931  11
  15  13   0 3.26111 3.55756   8
  15  13   0 8.59515 4.60655   2
 -16 -13   0 88.5970 9.48425   6
 -16 -13   0 88.5591 11.3044   4
 -16 -13   0 90.2260 10.0342   9
  16  13   0 60.2740 8.67888   8
  16  13   0 90.0205 10.5816  11
  16  13   0 95.1232 12.7651   2
  -6  14   0 12.9678 5.06358   2
  -6  14   0 6.01787 5.13557   5
  -6  14   0 9.69866 5.65680  10
  -6  14   0 18.2811 5.10421   7
  -6  14   0 16.0907 3.78080   9
  -5  14   0 113.141 9.59961   7
  -5  14   0 126.122 13.0904   5
  -5  14   0 112.793 7.66036   9
  -5  14   0 109.775 12.9808  10
  -5  14   0 154.061 12.7750   2
  -4  14   0 4.33932 4.68585  10
  -4  14   0 8.67869 3.86964   7
  -4  14   0 8.64295 4.81864   5
  -4  14   0 10.8613 4.91211   2
  -3  14   0 10.7995 3.63986   7
  -3  14   0 17.5119 5.12639   2
  -3  14   0 5.77587 5.11095   5
  -3  14   0 7.15444 5.17370  10
   2 -14   0 64.7136 5.55376   6
  -2  14   0 47.3659 8.71529  10
  -2  14   0 57.6596 8.06768   2
  -2  14   0 65.6656 11.1562   5
   1 -14   0 91.6146 6.67298   6
  -1  14   0 85.8043 10.1553   5
  -1  14   0 85.0118 9.17862   2
  -1  14   0 93.4415 10.2478  10
   0 -14   0 119.401 7.94604   6
   0  14   0 123.408 11.6129  10
   0  14   0 97.9261 10.4678   5
   0  14   0 135.642 11.4459   2
  -1 -14   0 121.435 8.16819   6
   1  14   0 117.851 6.87443   4
   1  14   0 121.601 10.7017   5
   1  14   0 131.433 10.9927  10
   1  14   0 139.004 11.5886   2
  -2 -14   0 2.70781 2.21442   6
   2  14   0 6.15530 3.51244   5
   2  14   0 -0.3987 1.47727   4
   2  14   0 2.29486 3.23696   2
   2  14   0 1.99039 2.50624  10
  -3 -14   0 93.6020 6.62086   5
  -3 -14   0 92.7442 7.43918   6
   3  14   0 101.642 10.0112   2
   3  14   0 111.114 10.3293  10
   3  14   0 93.7760 7.51687  11
   3  14   0 86.7486 5.79696   4
   3  14   0 93.6561 8.09676   5
  -4 -14   0 117.138 7.62279   5
  -4 -14   0 127.191 8.96229   6
   4  14   0 120.546 8.70702   5
   4  14   0 115.047 7.02371   4
   4  14   0 116.262 8.19696  11
   4  14   0 122.557 11.0769   2
   4  14   0 128.123 10.8415  10
  -5 -14   0 64.0954 5.87884   5
  -5 -14   0 80.0358 7.25821   6
   5  14   0 64.2283 5.66637   4
   5  14   0 62.3287 8.01164   2
   5  14   0 76.4149 8.56980  10
   5  14   0 81.8359 6.90590  11
  -6 -14   0 21.3176 4.10446   5
  -6 -14   0 17.9312 4.36258   6
   6  14   0 23.4726 5.76779  10
   6  14   0 26.0550 6.48686   2
   6  14   0 25.1046 4.24399   4
   6  14   0 28.7878 5.21901  11
  -7 -14   0 36.4930 5.85304   5
  -7 -14   0 52.6800 6.19391   6
   7  14   0 42.1367 5.39037   4
   7  14   0 52.3981 7.42571  10
   7  14   0 43.2479 5.72502  11
   7  14   0 38.2229 7.73110   2
  -8 -14   0 362.402 18.1556   4
  -8 -14   0 366.613 17.2796   6
  -8 -14   0 341.479 16.3442   5
   8  14   0 356.438 20.0710  10
   8  14   0 391.666 20.5751   2
   8  14   0 387.957 16.9425  11
  -9 -14   0 258.355 14.6192   6
  -9 -14   0 273.124 14.6656   5
  -9 -14   0 271.421 15.8966   4
   9  14   0 262.407 16.9131   2
   9  14   0 277.516 14.3471  11
   9  14   0 283.179 18.1140  10
 -10 -14   0 27.8198 6.28257   4
 -10 -14   0 30.5263 4.36738   9
 -10 -14   0 28.1697 5.67721   6
 -10 -14   0 23.2732 5.54578   5
  10  14   0 40.1495 7.96484   2
  10  14   0 21.9087 5.08712  11
  10  14   0 25.8581 7.48981  10
 -11 -14   0 13.6617 5.28170   5
 -11 -14   0 15.1252 3.69642   9
 -11 -14   0 12.6490 4.71441   4
 -11 -14   0 14.1861 4.27158   6
  11  14   0 16.1872 8.65860  10
  11  14   0 4.53775 3.45549  11
  11  14   0 8.44892 3.91203   8
  11  14   0 8.92323 4.94673   2
 -12 -14   0 148.762 11.4166   6
 -12 -14   0 157.750 9.77178   9
 -12 -14   0 148.184 16.2657   4
  12  14   0 146.984 11.2342   8
  12  14   0 136.915 13.7891  10
  12  14   0 134.983 14.2749   2
  12  14   0 155.448 11.5925  11
 -13 -14   0 30.0151 6.09686   6
 -13 -14   0 28.7739 6.83710   4
 -13 -14   0 27.8789 5.56777   9
  13  14   0 17.1123 5.11170  11
  13  14   0 17.7345 6.22163   2
  13  14   0 24.3355 5.91611   8
  13  14   0 15.7807 6.69511  10
 -14 -14   0 1.35952 3.43699   4
 -14 -14   0 -2.0690 3.12063   9
  14  14   0 -0.5987 2.92648  11
  14  14   0 5.08886 4.51868   2
  14  14   0 -0.7289 2.73500   8
  14  14   0 2.95874 4.46844  10
 -15 -14   0 5.24857 4.22050   4
 -15 -14   0 -6.8076 3.52684   9
 -15 -14   0 3.33212 3.12689   6
  15  14   0 -1.3866 3.24393   8
  15  14   0 -1.2371 4.14129   2
  15  14   0 7.71723 3.31182  11
  -5  15   0 23.5567 5.27352   7
  -5  15   0 12.5309 5.69899   2
  -5  15   0 30.6758 8.49633   5
  -5  15   0 30.5353 8.30663  10
  -4  15   0 117.462 13.4693   5
  -4  15   0 124.524 12.1478   2
  -4  15   0 122.887 13.9147  10
  -3  15   0 22.5952 6.72628  10
  -3  15   0 25.4898 7.38601   5
  -3  15   0 32.7982 7.26541   2
   2 -15   0 19.6341 3.73973   6
  -2  15   0 14.3907 5.06077   2
  -2  15   0 21.3216 6.40433  10
  -2  15   0 8.95487 5.85635   5
   1 -15   0 64.8782 6.22382   6
  -1  15   0 58.0235 8.48999   2
  -1  15   0 71.0917 9.53619  10
  -1  15   0 53.5746 9.52205   5
   0  15   0 -0.1057 3.03319   2
   0  15   0 6.63560 3.99844   5
   0  15   0 8.58811 3.53288  10
  -1 -15   0 10.9272 3.39243   6
   1  15   0 1.61768 3.85541   5
   1  15   0 4.07444 3.99735  10
   1  15   0 12.4496 4.79543   2
  -2 -15   0 92.4460 7.18207   5
  -2 -15   0 104.214 8.07765   6
   2  15   0 100.884 9.25356   5
   2  15   0 95.4037 5.64651   4
   2  15   0 102.123 10.1408  10
   2  15   0 92.9276 9.94616   2
  -3 -15   0 39.3827 5.58520   6
  -3 -15   0 33.6463 4.78646   5
   3  15   0 39.7436 10.4867   5
   3  15   0 46.4033 8.48568  10
   3  15   0 34.7472 7.86161   2
   3  15   0 35.1594 5.69930  11
   3  15   0 30.8514 3.95080   4
  -4 -15   0 41.3248 4.85280   5
  -4 -15   0 30.1166 5.50427   6
   4  15   0 34.2591 7.23958   2
   4  15   0 32.2679 6.75247  10
   4  15   0 41.6604 4.26508   4
   4  15   0 43.8791 5.67042  11
   4  15   0 38.9993 5.68933   5
  -5 -15   0 153.523 8.75303   5
  -5 -15   0 160.445 10.7427   6
   5  15   0 147.251 12.4741  10
   5  15   0 139.652 8.26630   4
   5  15   0 175.410 10.2486  11
   5  15   0 162.907 13.1713   2
  -6 -15   0 71.2041 7.38897   6
  -6 -15   0 73.2987 6.44767   5
   6  15   0 56.7500 5.76828   4
   6  15   0 65.5009 6.79224  11
   6  15   0 70.3791 9.03634   2
   6  15   0 83.0664 9.43881  10
  -7 -15   0 31.1213 5.56136   6
  -7 -15   0 32.5730 5.27223   5
   7  15   0 40.0678 7.80701   2
   7  15   0 36.3398 5.48108  11
   7  15   0 28.4612 6.75243  10
  -8 -15   0 11.4164 4.15708   6
  -8 -15   0 19.8054 4.53411   5
   8  15   0 18.7138 4.55431  11
   8  15   0 14.1779 5.02054   2
   8  15   0 21.0658 5.91001  10
  -9 -15   0 -0.0911 4.07189   6
  -9 -15   0 -3.1473 3.16599   5
   9  15   0 3.11068 3.37800  10
   9  15   0 -2.9540 2.32109  11
   9  15   0 0.83698 3.58421   2
 -10 -15   0 10.7765 3.85938   6
 -10 -15   0 5.90372 4.68209   4
 -10 -15   0 13.5622 4.79818   5
  10  15   0 7.90502 3.75408  11
  10  15   0 13.9018 5.67820  10
  10  15   0 13.5470 5.09080   2
 -11 -15   0 53.3534 7.47686   6
 -11 -15   0 47.4154 5.35050   9
 -11 -15   0 41.2571 8.14304   4
  11  15   0 67.4792 8.43551   8
  11  15   0 60.0552 9.27050   2
  11  15   0 51.6786 7.22361  11
  11  15   0 69.4709 9.50728  10
 -12 -15   0 -0.6120 2.47179   9
 -12 -15   0 5.55921 3.97969   4
 -12 -15   0 6.27533 3.31924   6
  12  15   0 2.41977 3.04191  11
  12  15   0 8.68092 4.15571  10
  12  15   0 7.74240 4.48015   2
 -13 -15   0 192.246 13.6971   6
 -13 -15   0 169.426 14.5862   4
 -13 -15   0 197.419 11.3627   9
  13  15   0 159.199 15.3887   2
  13  15   0 200.819 14.2422   8
  13  15   0 200.298 17.5364  10
  13  15   0 181.897 13.5063  11
 -14 -15   0 106.405 10.3286   6
 -14 -15   0 88.7359 11.0598   4
 -14 -15   0 80.3668 8.58613   9
  14  15   0 80.3408 11.7810   2
  14  15   0 69.5982 12.8523  10
  14  15   0 100.517 10.2373  11
  14  15   0 88.3460 9.66011   8
 -15 -15   0 14.0988 4.70521   9
 -15 -15   0 29.5832 6.49328   6
 -15 -15   0 19.3927 6.58520   4
  15  15   0 28.0822 6.25078  11
  15  15   0 30.8518 8.02828   2
  15  15   0 17.4826 5.74392   8
  -4  16   0 7.02389 4.18963   2
  -4  16   0 10.8768 6.38410   5
  -4  16   0 5.68315 5.06960  10
  -4  16   0 -1.0807 3.78728   7
  -3  16   0 219.286 18.1013   5
  -3  16   0 252.788 17.8458   2
  -3  16   0 213.761 17.8615  10
  -2  16   0 2.64473 3.58158  10
  -2  16   0 -1.4905 4.83153   5
  -2  16   0 7.76855 3.80686   2
   1 -16   0 30.5482 4.77796   6
  -1  16   0 42.4854 8.44440   2
  -1  16   0 19.3542 5.99611  10
  -1  16   0 14.2010 6.65354   5
   0 -16   0 85.8315 7.50996   6
   0  16   0 95.5316 10.3339   2
   0  16   0 82.9050 10.3650   5
   0  16   0 79.1253 10.1897  10
  -1 -16   0 144.748 9.43148   6
   1  16   0 139.131 12.0001   5
   1  16   0 147.664 12.7549   2
  -2 -16   0 -3.9109 1.98775   6
   2  16   0 0.02679 2.91082   2
   2  16   0 -4.7255 2.06332  11
   2  16   0 2.95705 1.85949   4
   2  16   0 2.60114 2.96019  10
   2  16   0 -0.7346 2.84870   5
  -3 -16   0 47.3063 5.74311   5
  -3 -16   0 57.0263 6.61197   6
   3  16   0 56.9381 4.82253   4
   3  16   0 61.1697 7.02093   5
   3  16   0 50.9915 6.34021  11
   3  16   0 51.1337 9.54950   2
   3  16   0 44.5968 8.32355  10
  -4 -16   0 7.15016 3.08864   5
  -4 -16   0 7.13060 3.26715   6
   4  16   0 9.68895 3.66899   5
   4  16   0 7.63005 3.77411   2
   4  16   0 3.73769 2.89398  11
   4  16   0 6.86318 3.70799  10
   4  16   0 6.80078 2.66625   4
  -5 -16   0 301.408 12.9336   5
  -5 -16   0 297.295 15.4826   6
   5  16   0 304.587 14.4167  11
   5  16   0 326.702 19.5363   2
   5  16   0 282.760 18.3343  10
  -6 -16   0 137.410 10.6916   6
  -6 -16   0 125.256 8.28396   5
   6  16   0 124.078 11.9887  10
   6  16   0 127.215 12.3990   2
   6  16   0 121.585 8.37173   4
   6  16   0 130.893 9.39988  11
  -7 -16   0 91.2681 8.74533   6
  -7 -16   0 77.7885 7.21559   5
   7  16   0 88.1751 7.85631  11
   7  16   0 84.4399 10.5535   2
   7  16   0 91.2089 12.3282  10
  -8 -16   0 95.0446 9.14844   6
  -8 -16   0 92.1083 8.09718   5
   8  16   0 101.128 8.66024  11
   8  16   0 105.289 11.7401  10
   8  16   0 114.887 11.7674   2
  -9 -16   0 147.234 11.2430   6
   9  16   0 155.402 14.1094   2
   9  16   0 154.531 13.9575  10
   9  16   0 139.151 10.4722  11
 -10 -16   0 17.5200 6.30364   5
 -10 -16   0 26.6585 5.99820   6
  10  16   0 31.8739 8.18125   2
  10  16   0 26.5509 7.69734  10
  10  16   0 25.3657 5.69515  11
 -11 -16   0 46.5153 8.71589   4
 -11 -16   0 44.9791 7.41234   6
  11  16   0 39.6169 6.59954  11
  11  16   0 21.6683 6.70625   2
  11  16   0 38.0862 7.45446   8
  11  16   0 37.4679 8.74453  10
 -12 -16   0 3.64066 3.07263   9
 -12 -16   0 6.58440 4.10528   6
 -12 -16   0 6.51307 4.19419   4
  12  16   0 3.36360 3.71423   8
  12  16   0 3.08923 4.37351   2
  12  16   0 8.44960 4.65814  10
  12  16   0 -0.0194 2.96208  11
 -13 -16   0 90.0737 8.03505   9
 -13 -16   0 92.0409 9.91132   6
 -13 -16   0 71.5471 10.6725   4
  13  16   0 79.6539 12.0422  10
  13  16   0 82.1702 9.84953   8
  13  16   0 92.4164 12.1219   2
  13  16   0 77.5727 9.38129  11
 -14 -16   0 268.216 19.0301   4
 -14 -16   0 278.298 14.6057   9
 -14 -16   0 295.728 17.7760   6
  14  16   0 270.898 21.5182  10
  14  16   0 312.322 18.0194  11
  14  16   0 278.878 17.0031   8
  14  16   0 281.278 20.2556   2
  -2  17   0 26.1087 7.37305   5
  -2  17   0 35.2055 8.08197  10
  -2  17   0 29.1129 7.03615   2
   1 -17   0 13.1642 3.81953   6
  -1  17   0 -4.0681 3.74786  10
  -1  17   0 1.97788 3.74303   2
  -1  17   0 -1.7004 4.84527   5
   0 -17   0 1.25129 3.11571   6
   0  17   0 -2.6025 3.50394   2
   0  17   0 7.38768 4.27908  10
   0  17   0 7.99275 5.33443   5
  -1 -17   0 57.5088 7.10965   6
   1  17   0 58.7701 10.6220  10
   1  17   0 68.5303 8.67365   5
   1  17   0 76.8463 9.94825   2
  -2 -17   0 68.6946 7.35713   6
   2  17   0 93.0310 10.8612  10
   2  17   0 76.1771 8.58380   5
   2  17   0 71.4395 9.78131   2
   2  17   0 61.8241 7.36861  11
  -3 -17   0 6.38062 3.50722   6
   3  17   0 2.09974 3.86061  10
   3  17   0 -0.7790 2.01606   4
   3  17   0 2.79733 5.04822   2
   3  17   0 8.59301 3.88633   5
   3  17   0 3.93304 2.61380  11
  -4 -17   0 2.97919 3.11380   6
  -4 -17   0 9.81810 3.59510   5
   4  17   0 12.2431 5.11728   2
   4  17   0 5.89421 3.10275  11
   4  17   0 7.64046 2.68864   4
   4  17   0 13.9108 5.05987  10
  -5 -17   0 20.5838 4.77270   6
  -5 -17   0 14.6093 3.71478   5
   5  17   0 17.7558 5.93508   2
   5  17   0 14.8929 4.12428  11
   5  17   0 19.5110 4.01542   4
   5  17   0 9.67501 5.30739  10
  -6 -17   0 15.8463 4.03852   5
  -6 -17   0 8.90436 4.02121   6
   6  17   0 10.2765 3.63176  11
   6  17   0 13.0903 5.15470   2
   6  17   0 9.81898 4.86258  10
  -7 -17   0 2.27472 2.97252   6
  -7 -17   0 4.33043 3.63601   5
   7  17   0 -0.2640 3.85402   2
   7  17   0 3.13650 2.97187  11
   7  17   0 4.61659 3.39669  10
  -8 -17   0 65.0354 8.33121   6
  -8 -17   0 57.7607 8.26629   5
   8  17   0 64.5487 7.23715  11
   8  17   0 42.8672 8.91084   2
   8  17   0 71.0334 9.54381  10
  -9 -17   0 13.9421 5.06013   5
  -9 -17   0 9.51469 4.21269   6
   9  17   0 15.1840 6.31568   2
   9  17   0 10.6727 3.80111  11
   9  17   0 7.19599 5.28557  10
 -10 -17   0 95.4087 9.75038   6
 -10 -17   0 72.5839 11.5384   5
  10  17   0 106.242 12.3479   2
  10  17   0 95.4117 8.95822  11
  10  17   0 102.616 11.9446  10
 -11 -17   0 3.86711 3.65321   6
  11  17   0 5.86504 4.60431  10
  11  17   0 4.06999 3.61560   8
  11  17   0 3.25790 2.82642  11
  11  17   0 3.99308 5.12890   2
 -12 -17   0 20.5733 5.73446   6
  12  17   0 17.4740 7.18270  10
  12  17   0 16.1441 5.84980   2
  12  17   0 32.1454 6.31934  11
  12  17   0 29.0528 6.76149   8
 -13 -17   0 20.3783 5.74541   6
 -13 -17   0 22.4316 6.73598   4
  13  17   0 22.2811 7.39891  10
  13  17   0 23.2524 6.25032   8
  13  17   0 19.1306 5.43105  11
  13  17   0 22.8896 7.51539   2
   0 -18   0 8.21018 3.85401   6
   0  18   0 5.41821 4.89874   5
   0  18   0 4.09875 3.93455   2
   0  18   0 6.79586 4.79986  10
  -1 -18   0 1.18331 3.69058   6
   1  18   0 -1.6189 2.98576  11
   1  18   0 -7.6757 3.99210  10
   1  18   0 -1.9745 3.29473   2
   1  18   0 6.60680 3.90820   5
  -2 -18   0 26.4427 5.61128   6
   2  18   0 23.6395 5.14895   5
   2  18   0 14.0017 4.22855  11
   2  18   0 17.5610 6.11455   2
   2  18   0 25.4327 7.82597  10
  -3 -18   0 149.576 10.9639   6
   3  18   0 161.282 14.3008  10
   3  18   0 159.124 10.3426  11
   3  18   0 166.885 15.0199   2
   3  18   0 155.441 10.8699   5
  -4 -18   0 8.71047 4.11838   6
   4  18   0 4.58435 3.87739   2
   4  18   0 -2.5230 2.95647  10
   4  18   0 -1.0969 3.05691  11
  -5 -18   0 89.9095 9.12090   6
   5  18   0 81.9417 7.86688  11
   5  18   0 92.9197 11.1928   2
   5  18   0 85.5705 10.9381  10
  -6 -18   0 42.2604 7.35551   6
   6  18   0 58.9769 6.80745  11
   6  18   0 47.6643 9.21077   2
   6  18   0 60.9134 9.27727  10
  -7 -18   0 80.6294 9.06120   6
   7  18   0 88.8848 10.7273  10
   7  18   0 84.1235 11.3009   2
   7  18   0 94.9178 8.24107  11
  -8 -18   0 10.6883 4.81950   6
   8  18   0 11.3417 4.74101   2
   8  18   0 9.32972 3.74941  11
   8  18   0 15.2386 5.85655  10
  -9 -18   0 40.6901 7.48048   6
   9  18   0 38.1213 9.44619   2
   9  18   0 35.2549 8.21326  10
   9  18   0 40.3853 6.31803  11
 -10 -18   0 23.4397 5.50228   6
  10  18   0 26.9428 8.14207  10
  10  18   0 25.7793 6.88226   2
  10  18   0 29.4658 7.57226   8
  10  18   0 21.1522 4.67052  11
 -11 -18   0 208.295 14.6350   6
  11  18   0 196.813 15.1282   8
  11  18   0 206.059 17.6075  10
  11  18   0 201.517 17.0174   2
  11  18   0 179.953 16.6908  11
  -3 -19   0 16.6028 5.16316   6
   3  19   0 18.1916 6.54831   2
   3  19   0 10.9984 4.32138  11
   3  19   0 5.06570 5.32207  10
  -4 -19   0 12.2189 4.34155   6
   4  19   0 -2.4121 4.07536   2
   4  19   0 8.96172 4.12552  11
   4  19   0 9.98007 5.25413  10
  -5 -19   0 12.2865 4.85355   6
   5  19   0 11.6939 4.01120  11
   5  19   0 3.97466 4.20418   2
   5  19   0 15.1602 5.70889  10
  -6 -19   0 20.4027 5.24128   6
   6  19   0 7.73104 3.96364  11
   6  19   0 9.40306 4.81904   2
   6  19   0 11.4347 5.75188  10
  -7 -19   0 26.1654 6.15690   6
   7  19   0 31.8183 8.54739   2
   7  19   0 21.5531 5.01876  11
   7  19   0 31.5172 7.24125  10
  -8 -19   0 35.3780 6.76643   6
   8  19   0 38.5359 8.98292  10
   8  19   0 27.8970 5.63036  11
   8  19   0 33.4107 8.25151   2
   9  19   0 4.97952 3.26213  11
   9  19   0 7.26211 4.98592   2
   9  19   0 8.50127 4.68237  10
   8  19  -1 9.58110 5.13855   2
   8  19  -1 0.11952 3.00774   8
   8  19  -1 4.89197 4.09458  11
   8  19  -1 5.12472 4.71286  10
  -8 -19   1 7.01734 3.80014   6
   7  19  -1 57.6781 10.8217  10
   7  19  -1 54.0191 10.9125   2
   7  19  -1 60.2008 9.30543   8
   7  19  -1 68.0640 7.13826  11
  -7 -19   1 41.7871 7.53531   6
   6  19  -1 5.99937 4.01083   2
   6  19  -1 0.87366 3.94479  10
   6  19  -1 2.17050 2.82153  11
  -6 -19   1 -1.1737 3.49344   6
   5  19  -1 82.6496 11.1291  10
   5  19  -1 74.6730 7.47255  11
   5  19  -1 90.2480 11.7027   2
  -5 -19   1 79.2069 9.21666   6
   4  19  -1 5.41348 4.38411  10
   4  19  -1 -3.4215 2.53687  11
   4  19  -1 2.02249 3.70627   2
  -4 -19   1 -0.2869 3.29940   6
  11  18  -1 112.778 13.2276   2
  11  18  -1 99.1422 9.88208  11
  11  18  -1 106.408 11.2950   8
  11  18  -1 104.875 13.3270  10
 -11 -18   1 100.345 10.7424   6
  10  18  -1 35.0102 7.73761   8
  10  18  -1 49.0959 6.82510  11
  10  18  -1 30.7834 8.31549   2
  10  18  -1 31.2696 8.51460  10
 -10 -18   1 28.4833 6.54695   6
   9  18  -1 5.25916 4.42810  10
   9  18  -1 11.8125 3.70202  11
   9  18  -1 6.97238 3.93836   8
   9  18  -1 10.1441 4.40007   2
  -9 -18   1 3.08857 3.73383   6
   8  18  -1 49.1780 10.7074   2
   8  18  -1 40.6963 8.59047  10
   8  18  -1 56.9050 10.0907   8
   8  18  -1 43.0095 6.19472  11
  -8 -18   1 47.6059 8.09264   6
   7  18  -1 7.57619 5.25382   2
   7  18  -1 4.68740 2.79541  11
   7  18  -1 3.64737 4.03667  10
  -7 -18   1 12.3147 4.96695   6
   6  18  -1 115.689 12.8542   2
   6  18  -1 105.815 11.8912  10
   6  18  -1 132.053 9.08015  11
  -6 -18   1 148.023 11.2916   6
   5  18  -1 6.41834 3.01361  11
   5  18  -1 8.83614 5.27525   2
   5  18  -1 9.05855 4.10464  10
  -5 -18   1 5.79429 3.42279   6
   4  18  -1 10.5577 5.13927  10
   4  18  -1 13.8954 5.65982   2
   4  18  -1 3.97832 3.27745  11
  -4 -18   1 14.5045 4.51866   6
   3  18  -1 0.93172 2.91587  11
   3  18  -1 4.09891 4.44162   2
   3  18  -1 -3.9505 3.13714  10
   2  18  -1 111.660 8.37299  11
   2  18  -1 108.111 12.4059   2
   2  18  -1 119.212 12.2601  10
   2  18  -1 98.7969 8.62679   5
  -2 -18   1 107.174 9.62843   6
   1  18  -1 26.9790 6.68758  10
   1  18  -1 12.5399 4.45166   5
   1  18  -1 23.0157 6.84734   2
   1  18  -1 15.1822 3.99882  11
  -1 -18   1 22.8001 5.34823   6
   0  18  -1 27.7985 6.41042   5
   0  18  -1 31.0873 5.39327  11
   0  18  -1 31.0290 7.20321  10
   0  18  -1 44.2593 9.20561   2
   0 -18   1 16.2761 5.64812   6
  13  17  -1 24.2381 5.38996  11
  13  17  -1 33.5857 8.66256  10
  13  17  -1 25.5201 8.09555   2
  13  17  -1 29.9928 6.68671   8
 -13 -17   1 24.0492 6.48930   6
  12  17  -1 35.8729 8.04882   2
  12  17  -1 22.0094 8.53656  11
  12  17  -1 28.8855 6.91479   8
  12  17  -1 26.0844 7.62232  10
 -12 -17   1 30.8556 6.44326   6
  11  17  -1 106.418 12.9605   2
  11  17  -1 135.635 10.6406  11
  11  17  -1 134.822 12.1945   8
  11  17  -1 137.601 13.9048  10
 -11 -17   1 140.898 11.9755   6
  10  17  -1 138.702 13.7196  10
  10  17  -1 138.812 10.4689  11
  10  17  -1 134.512 13.8194   2
  10  17  -1 166.296 13.4695   8
 -10 -17   1 145.907 12.1705   6
   9  17  -1 -1.2423 2.60250  11
   9  17  -1 0.97914 3.50842   2
   9  17  -1 -1.9159 3.28775  10
   9  17  -1 3.67891 3.49357   8
  -9 -17   1 1.40865 3.76867   5
  -9 -17   1 3.92440 3.35619   6
   8  17  -1 35.2906 5.76924  11
   8  17  -1 39.0811 7.99384  10
   8  17  -1 45.6308 9.17165   2
  -8 -17   1 27.6614 4.86172   5
  -8 -17   1 40.9051 7.10010   6
   7  17  -1 111.523 12.4085   2
   7  17  -1 120.403 8.73952  11
   7  17  -1 114.831 11.5167  10
  -7 -17   1 111.348 10.1208   6
  -7 -17   1 82.5436 7.33777   5
   6  17  -1 0.51892 3.39910   2
   6  17  -1 3.90483 3.44395  10
   6  17  -1 2.22768 2.47812  11
  -6 -17   1 2.53285 3.17543   6
  -6 -17   1 4.93331 2.80505   5
   5  17  -1 81.5244 8.31033   4
   5  17  -1 98.5344 7.88573  11
   5  17  -1 103.655 11.2773  10
   5  17  -1 109.424 11.5656   2
  -5 -17   1 90.0254 6.68438   5
  -5 -17   1 88.8704 16.7987   6
   4  17  -1 8.04008 4.62975  10
   4  17  -1 7.40707 2.96529  11
   4  17  -1 5.73961 3.12855   4
   4  17  -1 6.13287 4.63196   2
  -4 -17   1 6.08901 3.17696   6
   3  17  -1 58.0121 8.29299  10
   3  17  -1 49.5512 5.74879  11
   3  17  -1 36.3989 4.86013   4
   3  17  -1 45.2727 7.43896   5
   3  17  -1 49.1241 9.36337   2
  -3 -17   1 56.0528 7.09956   6
   2  17  -1 50.6881 5.06025   4
   2  17  -1 64.4981 9.53938  10
   2  17  -1 82.0899 9.85829   2
   2  17  -1 66.3931 7.19494   5
   2  17  -1 41.8509 6.06368  11
  -2 -17   1 70.2425 7.48821   6
   1  17  -1 33.4292 6.04190   5
   1  17  -1 22.0990 5.81954  10
   1  17  -1 24.6800 7.55631   2
   1  17  -1 17.1882 4.05720  11
  -1 -17   1 27.3050 5.50413   6
   0  17  -1 13.1829 5.07500  10
   0  17  -1 18.0081 5.27231   5
   0  17  -1 5.47721 4.29768   2
   0 -17   1 11.4481 4.28552   6
  -1  17  -1 54.4047 9.57868   2
  -1  17  -1 61.8924 10.6488  10
  -1  17  -1 85.9485 10.6880   5
   1 -17   1 67.8229 7.66088   6
  -2  17  -1 20.9943 5.94863   5
  -2  17  -1 -2.0976 4.74353  10
  -2  17  -1 -5.1674 3.26062   2
  14  16  -1 56.9231 12.4070  10
  14  16  -1 56.1467 9.30386   8
  14  16  -1 49.8593 8.35017  11
  14  16  -1 74.8858 10.8464   2
 -14 -16   1 48.7626 7.01489   9
 -14 -16   1 59.9310 10.6346   4
 -14 -16   1 55.6100 8.97074   6
  13  16  -1 4.25205 3.60842  11
  13  16  -1 4.14966 4.95306   2
  13  16  -1 1.43359 4.86683  10
  13  16  -1 10.1463 4.78918   8
 -13 -16   1 3.67461 4.72340   4
 -13 -16   1 5.91522 4.00733   6
 -13 -16   1 6.99566 3.48875   9
  12  16  -1 3.18037 3.54074   8
  12  16  -1 2.39324 3.96541  10
  12  16  -1 -5.4309 3.53390   2
  12  16  -1 4.99390 3.40006  11
 -12 -16   1 0.97942 3.31365   6
 -12 -16   1 7.16628 4.69931   4
 -12 -16   1 5.01659 3.20888   9
  11  16  -1 5.26719 4.32400  10
  11  16  -1 5.54262 2.98543  11
  11  16  -1 2.49767 3.64455   2
  11  16  -1 2.05198 2.52178   8
 -11 -16   1 1.91177 3.21559   6
 -11 -16   1 20.2243 6.26807   5
  10  16  -1 84.9845 11.0105  10
  10  16  -1 87.3824 10.9675   2
  10  16  -1 89.1076 8.47945  11
  10  16  -1 99.5614 10.3591   8
 -10 -16   1 87.6305 9.45334   6
   9  16  -1 155.323 10.6851  11
   9  16  -1 160.824 14.1225  10
   9  16  -1 156.544 14.1205   2
   9  16  -1 141.925 11.9182   8
  -9 -16   1 143.151 11.5174   6
  -9 -16   1 132.118 9.77694   5
   8  16  -1 4.25038 2.96082  11
   8  16  -1 12.5988 5.47299   2
   8  16  -1 13.1724 5.22391  10
  -8 -16   1 5.53478 3.47419   5
  -8 -16   1 7.31872 3.88308   6
   7  16  -1 8.81048 4.39376  10
   7  16  -1 14.5775 5.45594   2
   7  16  -1 13.3316 4.00575  11
  -7 -16   1 18.9317 3.56202   5
   6  16  -1 169.788 10.0870  11
   6  16  -1 155.391 12.8237  10
   6  16  -1 159.494 13.9764   2
  -6 -16   1 144.932 8.23048   5
  -6 -16   1 157.969 11.5536   6
   5  16  -1 30.1431 4.94200   4
   5  16  -1 31.1525 7.20975  10
   5  16  -1 33.4567 7.66581   2
   5  16  -1 36.0591 5.41146  11
  -5 -16   1 23.8744 3.96374   5
  -5 -16   1 51.2265 6.76510   6
   4  16  -1 1.71503 2.43590  10
   4  16  -1 2.74678 3.03388   2
   4  16  -1 0.35372 1.96330  11
  -4 -16   1 3.34267 2.71203   6
   3  16  -1 0.76084 2.60462   5
   3  16  -1 7.07925 2.60376   4
   3  16  -1 8.76049 3.83664  10
   3  16  -1 4.17463 3.43444   2
   3  16  -1 8.26363 3.13157  11
  -3 -16   1 3.23889 2.84335   6
   2  16  -1 46.9376 4.58999   4
   2  16  -1 46.6555 8.69959  10
   2  16  -1 48.9686 5.86982  11
   2  16  -1 45.7471 8.42483   2
  -2 -16   1 50.2316 6.44819   6
   1  16  -1 79.1998 9.74876   2
   1  16  -1 87.8740 8.39636   5
   1  16  -1 65.5855 9.05077  10
   1  16  -1 72.5986 4.99027   4
  -1 -16   1 69.2168 7.13460   6
   0  16  -1 25.3391 6.09695   5
   0  16  -1 22.8653 9.90894  10
   0  16  -1 28.6656 6.82962   2
   0 -16   1 28.2993 4.87183   6
  -1  16  -1 -5.3699 3.99101   5
  -1  16  -1 20.9541 5.42724   2
  -1  16  -1 7.16272 4.76855  10
   1 -16   1 6.60184 3.55048   6
  -2  16  -1 31.9185 7.38155   5
  -2  16  -1 29.6164 6.81858  10
  -2  16  -1 26.2382 6.46947   2
   2 -16   1 25.2835 4.94267   6
  -3  16  -1 -2.1682 4.46327  10
  -3  16  -1 9.88855 5.08909   2
  -3  16  -1 7.52449 5.34757   5
  -4  16  -1 11.2284 6.39482   5
  -4  16  -1 7.96572 5.20835  10
  -4  16  -1 4.75257 5.17807   2
  -4  16  -1 3.56071 4.44246   7
  14  15  -1 140.030 15.0046   2
  14  15  -1 139.086 11.8600   8
  14  15  -1 147.642 12.3884  11
  14  15  -1 165.265 16.3892  10
 -14 -15   1 173.073 13.3561   6
 -14 -15   1 153.189 11.3990   9
 -14 -15   1 152.648 14.5958   4
  13  15  -1 119.560 11.1852   8
  13  15  -1 109.331 13.3186  10
  13  15  -1 137.099 13.7464   2
  13  15  -1 136.167 13.2824  11
 -13 -15   1 126.050 11.3755   6
 -13 -15   1 121.570 9.56768   9
 -13 -15   1 133.852 13.2725   4
  12  15  -1 4.02278 4.11035   2
  12  15  -1 0.56166 4.31811  10
  12  15  -1 9.06934 4.14975  11
  12  15  -1 12.6071 4.56751   8
 -12 -15   1 9.08243 4.74014   4
 -12 -15   1 1.25519 3.08203   9
 -12 -15   1 8.04563 3.97520   6
  11  15  -1 40.0929 9.53102  10
  11  15  -1 34.3739 6.42328  11
  11  15  -1 47.3012 9.42415   2
 -11 -15   1 41.6496 5.45347   9
 -11 -15   1 40.9515 10.3111   4
 -11 -15   1 57.9366 8.78788   5
 -11 -15   1 43.4625 7.63412   6
  10  15  -1 36.8167 8.04252   2
  10  15  -1 25.7090 6.65865   8
  10  15  -1 15.7853 5.56613  10
  10  15  -1 28.5483 5.46976  11
 -10 -15   1 32.0847 6.98593   5
 -10 -15   1 33.0238 7.17699   4
 -10 -15   1 29.4326 6.14567   6
   9  15  -1 81.4547 8.65902   8
   9  15  -1 61.3812 11.1393   2
   9  15  -1 62.5239 7.26273  11
   9  15  -1 72.0628 9.39722  10
  -9 -15   1 80.8673 8.74427   6
  -9 -15   1 68.6138 7.68860   5
   8  15  -1 280.493 21.2411   2
   8  15  -1 267.633 13.5755  11
   8  15  -1 285.663 17.9790  10
  -8 -15   1 256.707 14.7926   6
  -8 -15   1 251.484 12.6627   5
   7  15  -1 98.5436 10.6529   2
   7  15  -1 86.2175 9.76424  10
   7  15  -1 77.0540 7.15304  11
  -7 -15   1 85.2188 8.38160   6
  -7 -15   1 85.7572 6.96834   5
   6  15  -1 84.1533 9.90690   2
   6  15  -1 93.2092 9.62162  10
   6  15  -1 85.5172 7.09092  11
   6  15  -1 62.8068 6.84438   4
  -6 -15   1 92.8317 8.72109   6
  -6 -15   1 88.9213 6.45560   5
   5  15  -1 324.987 14.1772   4
   5  15  -1 325.915 14.3924  11
   5  15  -1 364.752 20.0006   2
   5  15  -1 330.730 18.6500  10
  -5 -15   1 366.557 16.8450   6
  -5 -15   1 327.492 12.9267   5
   4  15  -1 75.2222 9.11134   2
   4  15  -1 71.7004 5.74460   4
   4  15  -1 65.7100 6.16450  11
   4  15  -1 63.4083 8.02952  10
  -4 -15   1 69.3660 7.28572   6
  -4 -15   1 55.5989 5.37395   5
   3  15  -1 91.0790 6.98253  11
   3  15  -1 99.8130 7.49818   5
   3  15  -1 86.7940 9.44622  10
   3  15  -1 89.8018 9.80238   2
   3  15  -1 75.2851 5.97039   4
  -3 -15   1 91.1158 6.37317   5
  -3 -15   1 83.0277 7.67712   6
   2  15  -1 3.49108 3.28059  10
   2  15  -1 5.71336 3.14429   5
   2  15  -1 10.2442 3.26068  11
   2  15  -1 10.2473 4.34470   2
  -2 -15   1 10.6848 3.42513   6
   1  15  -1 102.538 11.8376   5
   1  15  -1 110.790 10.6264   2
   1  15  -1 103.871 5.86894   4
   1  15  -1 97.3696 9.94906  10
  -1 -15   1 95.3217 7.74395   6
   0  15  -1 26.2601 6.37404  10
   0  15  -1 38.8580 7.10695   5
   0 -15   1 40.6585 5.32532   6
  -1  15  -1 70.8981 10.2808   5
  -1  15  -1 112.808 10.7711   2
  -1  15  -1 76.7478 9.79019  10
   1 -15   1 111.351 7.82212   6
  -2  15  -1 -1.4889 2.83709  10
  -2  15  -1 -0.6678 2.95378   2
  -2  15  -1 -1.6153 4.12034   5
   2 -15   1 -1.6161 2.32617   6
  -3  15  -1 170.501 14.5451  10
  -3  15  -1 172.433 14.9477   5
  -3  15  -1 174.968 14.2516   2
  -4  15  -1 79.0722 9.99818   2
  -4  15  -1 77.5393 10.5489  10
  -4  15  -1 61.9377 10.4242   5
  -5  15  -1 10.7988 4.63480   7
  -5  15  -1 -0.6907 4.13721   2
  -5  15  -1 5.86682 4.81479  10
  15  14  -1 3.25197 3.49749  11
  15  14  -1 6.46870 5.36573   2
  15  14  -1 6.31404 4.06631   8
 -15 -14   1 6.09641 4.25923   6
 -15 -14   1 -1.2762 3.93769   9
  14  14  -1 42.7840 7.56846   8
  14  14  -1 21.8266 7.45252   2
  14  14  -1 54.3303 7.55462  11
 -14 -14   1 50.7102 8.41095   6
 -14 -14   1 49.4373 9.32686   4
 -14 -14   1 37.6281 6.38158   9
  13  14  -1 13.2741 4.90555   8
  13  14  -1 23.3314 5.67649  11
  13  14  -1 17.2887 6.54834   2
  13  14  -1 21.4480 7.11963  10
 -13 -14   1 17.0292 5.98286   4
 -13 -14   1 13.4807 4.38193   6
 -13 -14   1 18.3038 4.92038   9
  12  14  -1 14.7805 5.55885  10
  12  14  -1 27.5897 6.07007   8
  12  14  -1 5.24664 5.48928   2
  12  14  -1 19.5847 5.29170  11
 -12 -14   1 21.2208 5.87799   4
 -12 -14   1 18.0298 4.78658   6
 -12 -14   1 17.9823 4.63552   9
  11  14  -1 48.9070 6.58467  11
  11  14  -1 59.9910 9.19344  10
  11  14  -1 47.5514 7.29209   8
  11  14  -1 55.4556 15.3718   2
 -11 -14   1 44.4014 8.50755   4
 -11 -14   1 45.7152 6.47505   6
 -11 -14   1 37.3505 6.42999   5
 -11 -14   1 49.5882 8.01169   9
  10  14  -1 9.03069 3.56112  11
  10  14  -1 2.98883 3.56293   2
  10  14  -1 10.4034 4.23908   8
  10  14  -1 9.78324 5.15510  10
 -10 -14   1 9.91687 4.56818   4
 -10 -14   1 9.84371 6.21257   6
 -10 -14   1 -0.7226 3.67000   5
 -10 -14   1 9.45176 2.89114   9
   9  14  -1 69.6719 9.01443  10
   9  14  -1 66.5705 9.07696   2
   9  14  -1 66.3091 7.07456  11
  -9 -14   1 63.7868 7.33348   6
  -9 -14   1 76.5205 8.67022   4
   8  14  -1 42.9127 8.14396  10
   8  14  -1 53.6089 8.36083   2
   8  14  -1 45.6137 6.03189  11
  -8 -14   1 47.6575 6.35413   6
  -8 -14   1 60.1333 6.74503   5
   7  14  -1 65.4817 6.55253  11
   7  14  -1 52.9809 7.78854  10
   7  14  -1 69.3508 8.70091   2
  -7 -14   1 63.6845 6.35540   5
  -7 -14   1 58.4667 6.80345   6
   6  14  -1 9.01409 2.99947  11
   6  14  -1 8.14058 3.10975   4
   6  14  -1 2.47125 2.81220  10
   6  14  -1 5.91387 3.63821   2
  -6 -14   1 9.80801 3.55178   6
  -6 -14   1 10.6506 2.88757   5
   5  14  -1 12.3295 4.40987   2
   5  14  -1 14.1312 4.91893  10
   5  14  -1 11.0192 3.29133  11
  -5 -14   1 13.0920 3.97909   6
  -5 -14   1 10.1558 2.71855   5
   4  14  -1 124.259 10.6346  10
   4  14  -1 119.393 7.64865   4
   4  14  -1 122.398 8.11756  11
   4  14  -1 133.824 11.3843   2
  -4 -14   1 119.023 7.02207   5
  -4 -14   1 126.827 9.16569   6
   3  14  -1 70.3830 7.98033  10
   3  14  -1 48.2157 5.63269   5
   3  14  -1 52.4976 7.58644   2
   3  14  -1 47.9829 4.67942   4
   3  14  -1 50.8023 5.63554  11
  -3 -14   1 62.5487 6.37163   6
  -3 -14   1 49.3050 4.82385   5
   2  14  -1 38.6568 6.86719  10
   2  14  -1 35.4806 7.13939   2
   2  14  -1 38.7614 5.11372   5
   2  14  -1 28.6702 3.56026   4
   2  14  -1 29.5087 4.73851  11
   2  14  -1 33.2395 5.37699   6
  -2 -14   1 31.1645 4.25415   5
  -2 -14   1 33.6814 5.26711   6
   1  14  -1 28.0424 5.53145   5
   1  14  -1 22.2059 5.65594   2
   1  14  -1 26.2504 5.93941  10
   1  14  -1 22.9763 3.17329   4
  -1 -14   1 15.0507 3.76638   6
   0  14  -1 89.4119 9.45335   2
   0  14  -1 73.0178 8.56321  10
   0  14  -1 98.6413 9.50353   5
   0  14  -1 83.5784 5.20903   4
   0 -14   1 86.5686 6.84372   6
  -1  14  -1 15.4949 4.71901  10
  -1  14  -1 19.3132 5.36405   5
  -1  14  -1 17.5869 5.53605   2
   1 -14   1 16.4546 3.57370   6
  -2  14  -1 14.3275 4.15265  11
  -2  14  -1 5.55317 4.13478   5
  -2  14  -1 0.23706 3.01940   2
  -2  14  -1 3.98013 3.72341  10
   2 -14   1 5.78826 2.94822   6
  -3  14  -1 4.10452 3.33138  10
  -3  14  -1 -4.8526 3.27001   2
  -3  14  -1 3.30403 4.43266   5
  -4  14  -1 79.9250 9.51436   2
  -4  14  -1 72.0927 10.4513   5
  -5  14  -1 79.5050 8.51739   7
  -5  14  -1 82.4982 10.9327   5
  -5  14  -1 83.8483 11.0650  10
  -5  14  -1 90.1109 6.50517   9
  -5  14  -1 76.3412 9.36069   2
  -6  14  -1 0.38602 2.69512   9
  -6  14  -1 -2.6967 3.54203   2
  -6  14  -1 -9.9111 4.13753  10
  -6  14  -1 15.0533 4.67708   7
  -6  14  -1 -7.6297 4.99717   8
  16  13  -1 340.891 17.1022   8
  16  13  -1 299.937 22.3569   2
  16  13  -1 335.562 20.3842  11
 -16 -13   1 355.773 22.0941   4
 -16 -13   1 356.967 19.5476   9
 -16 -13   1 339.874 18.5640   6
  15  13  -1 -3.6393 3.93159   2
  15  13  -1 3.26344 3.50644  11
  15  13  -1 -0.2953 3.29817   8
 -15 -13   1 -3.6823 3.30986   9
 -15 -13   1 -1.3139 3.86627   4
 -15 -13   1 7.25092 3.52392   6
  14  13  -1 10.0910 4.01998   8
  14  13  -1 9.53989 5.83226   2
  14  13  -1 9.46531 4.70557  11
 -14 -13   1 12.2551 4.63421   6
 -14 -13   1 16.5986 5.46146   4
 -14 -13   1 13.7682 4.62035   9
  13  13  -1 56.4290 10.8558  10
  13  13  -1 32.4866 6.26478  11
  13  13  -1 38.0303 8.63228   2
  13  13  -1 47.7670 7.11287   8
 -13 -13   1 50.2496 8.93395   4
 -13 -13   1 51.3807 6.84368   9
 -13 -13   1 45.6676 7.34266   6
  12  13  -1 103.197 12.2696  10
  12  13  -1 109.829 9.38625   8
  12  13  -1 125.141 12.2480   2
  12  13  -1 131.459 10.4140  11
 -12 -13   1 118.264 8.65965   9
 -12 -13   1 110.715 9.68330   6
  11  13  -1 33.6607 7.67521  10
  11  13  -1 39.7298 6.00785  11
  11  13  -1 28.2708 5.65744   8
  11  13  -1 30.5528 7.53724   2
 -11 -13   1 34.3201 6.54749   4
 -11 -13   1 28.5510 4.75218   9
 -11 -13   1 24.0375 5.81792   5
 -11 -13   1 24.4749 5.29259   6
  10  13  -1 35.5620 6.90214   8
  10  13  -1 31.7965 7.32697  10
  10  13  -1 43.9266 6.07071  11
  10  13  -1 37.7844 8.07421   2
 -10 -13   1 41.3457 4.92730   9
 -10 -13   1 33.0203 6.04527   6
 -10 -13   1 34.2374 6.31025   5
 -10 -13   1 46.8081 6.96089   4
   9  13  -1 188.995 12.1925   8
   9  13  -1 177.063 10.7933  11
   9  13  -1 181.197 13.9763  10
   9  13  -1 171.724 13.3081   2
  -9 -13   1 173.617 11.4171   6
  -9 -13   1 161.735 10.9450   5
  -9 -13   1 175.350 12.6782   4
  -9 -13   1 183.809 8.95152   9
   8  13  -1 710.209 29.4534  10
   8  13  -1 715.776 24.3611  11
   8  13  -1 712.804 29.0337   2
  -8 -13   1 696.073 24.6787   5
  -8 -13   1 687.254 25.3262   6
  -8 -13   1 703.010 27.0337   4
   7  13  -1 216.270 11.5805   4
   7  13  -1 217.947 14.6097   2
   7  13  -1 220.803 11.4154  11
   7  13  -1 210.062 14.0836  10
  -7 -13   1 226.124 12.4150   6
  -7 -13   1 207.195 11.2435   5
   6  13  -1 34.8630 6.74500   2
   6  13  -1 39.8119 7.12947  10
   6  13  -1 41.0606 5.04249  11
   6  13  -1 40.8254 4.92582   4
  -6 -13   1 35.9154 5.07658   6
  -6 -13   1 43.7535 4.87808   5
   5  13  -1 85.5572 7.90276  11
   5  13  -1 82.2413 6.48869   4
   5  13  -1 96.2553 9.08771  10
   5  13  -1 86.1165 8.84990   2
  -5 -13   1 82.0029 5.80558   5
  -5 -13   1 80.0769 7.18343   6
   4  13  -1 58.6821 5.39014   4
   4  13  -1 60.1602 5.64179  11
   4  13  -1 57.3712 7.51538  10
   4  13  -1 72.0481 8.04001   2
  -4 -13   1 66.0459 5.00401   5
  -4 -13   1 66.0628 6.56721   6
   3  13  -1 296.291 16.1338  10
   3  13  -1 310.717 12.7284  11
   3  13  -1 270.169 12.5058   6
   3  13  -1 291.292 16.4944   2
   3  13  -1 287.327 12.7863   5
   3  13  -1 293.012 12.0728   4
  -3 -13   1 283.989 13.4031   6
  -3 -13   1 291.728 11.4115   5
   2  13  -1 152.526 11.6326   2
   2  13  -1 149.880 8.79136  11
   2  13  -1 148.133 7.79088   4
   2  13  -1 147.534 11.1844  10
   2  13  -1 142.584 9.14293   5
   2  13  -1 144.695 8.39044   6
  -2 -13   1 156.834 7.83221   5
  -2 -13   1 157.708 9.29838   6
   1  13  -1 164.491 11.8304  10
   1  13  -1 149.230 11.4371   2
   1  13  -1 144.820 7.38019   4
   1  13  -1 149.294 10.0081   5
   1  13  -1 138.757 10.3136   3
  -1 -13   1 141.441 8.65019   6
   0  13  -1 302.642 16.7072  10
   0  13  -1 311.139 16.7644   2
   0  13  -1 267.790 13.7832   3
   0  13  -1 286.379 15.9510   5
   0  13  -1 277.281 10.6577   4
   0 -13   1 305.616 12.7046   6
  -1  13  -1 366.314 18.4304   2
  -1  13  -1 329.670 15.6051   3
  -1  13  -1 333.229 18.2597   5
  -1  13  -1 329.212 11.5744   4
  -1  13  -1 314.926 15.1786   7
  -1  13  -1 345.845 18.3736  10
   1 -13   1 362.146 19.4835   6
  -2  13  -1 7.71464 3.38473  10
  -2  13  -1 7.46497 3.23214  11
  -2  13  -1 0.97247 2.74400   2
  -2  13  -1 4.70500 3.62008   3
  -2  13  -1 9.59281 4.12914   5
  -2  13  -1 6.05976 2.95277   7
   2 -13   1 7.53500 2.64658   6
  -3  13  -1 114.365 8.32770   7
  -3  13  -1 123.703 10.1029   3
  -3  13  -1 131.125 10.8970   2
  -3  13  -1 151.374 12.5397   5
  -3  13  -1 131.184 11.8974  10
  -3  13  -1 122.602 9.60017  11
   3 -13   1 118.999 7.40259   6
  -4  13  -1 0.30144 1.79078   9
  -4  13  -1 1.82954 3.01136   5
  -4  13  -1 1.82219 3.80361  10
  -4  13  -1 4.23806 4.74301   3
  -4  13  -1 2.02396 2.83927   2
  -4  13  -1 -3.7189 2.75491   7
  -5  13  -1 81.6932 6.24893   9
  -5  13  -1 77.1625 8.04303   7
  -5  13  -1 104.968 10.3667   5
  -5  13  -1 90.7988 10.8451  10
  -5  13  -1 65.7719 9.96569   3
  -5  13  -1 87.0802 9.79705   2
  -6  13  -1 22.0031 4.48707   9
  -6  13  -1 33.4099 7.77854  10
  -6  13  -1 32.8052 6.80502   5
  -6  13  -1 30.8334 6.55574   2
  -6  13  -1 36.5965 7.84819   3
  -6  13  -1 26.8347 4.66944   7
  -6  13  -1 35.9458 6.48117   7
  -7  13  -1 17.4937 5.49468   2
  -7  13  -1 20.7239 4.98759   8
  -7  13  -1 10.2252 5.32032   5
  -7  13  -1 15.1788 4.24218   9
  -8  13  -1 3.77655 3.25843   9
  -8  13  -1 1.74575 5.63329  10
  -8  13  -1 10.8345 4.03177   8
  -8  13  -1 2.56983 4.36725   5
  -8  13  -1 7.01611 4.38038   2
  16  12  -1 63.3222 9.26196  11
  16  12  -1 53.0058 11.8399   2
  16  12  -1 63.0383 7.93955   8
 -16 -12   1 67.1305 9.86244   4
 -16 -12   1 90.2679 9.67519   9
 -16 -12   1 64.6929 8.31314   6
  15  12  -1 83.0001 9.42505  11
  15  12  -1 76.2151 7.87440   8
  15  12  -1 61.6772 11.5953   2
 -15 -12   1 84.2732 8.42045   6
 -15 -12   1 77.2075 15.6352   9
 -15 -12   1 73.9537 10.1879   4
  14  12  -1 2.59261 2.76493   8
  14  12  -1 3.36806 4.19410   2
  14  12  -1 2.65272 3.23017  11
 -14 -12   1 1.13119 2.73039   6
 -14 -12   1 -1.8666 2.83033   9
 -14 -12   1 5.85342 3.52425   4
  13  12  -1 27.1957 5.88991  11
  13  12  -1 28.6759 5.99185   8
  13  12  -1 28.3968 7.46771   2
 -13 -12   1 38.5673 6.65649   9
 -13 -12   1 31.6045 5.65524   6
 -13 -12   1 33.8682 7.04679   4
  12  12  -1 1.09701 2.03054  11
  12  12  -1 -0.8828 3.22396  10
  12  12  -1 0.68787 2.54260   8
  12  12  -1 0.60339 3.52698   2
 -12 -12   1 -0.1991 2.72748   4
 -12 -12   1 0.26727 2.08814   9
 -12 -12   1 2.93191 2.41427   6
  11  12  -1 2.71563 2.70254  11
  11  12  -1 0.50703 3.22353  10
  11  12  -1 -0.7545 2.77211   2
  11  12  -1 4.42805 2.78819   8
 -11 -12   1 5.37738 3.16324   4
 -11 -12   1 -0.3669 2.14896   6
 -11 -12   1 5.63081 3.79385   5
 -11 -12   1 0.84200 2.07201   9
  10  12  -1 2.59889 2.59326  11
  10  12  -1 4.28461 3.00155   8
  10  12  -1 5.50426 3.73131  10
  10  12  -1 6.66977 4.21025   2
 -10 -12   1 3.35317 2.73804   6
 -10 -12   1 3.33669 3.29225   4
 -10 -12   1 7.27622 2.82087   9
 -10 -12   1 5.57684 3.12653   5
   9  12  -1 7.65224 3.09696   8
   9  12  -1 2.25231 3.32475   2
   9  12  -1 11.2971 3.40810  11
   9  12  -1 1.59154 2.74443  10
  -9 -12   1 7.49202 2.95026   6
  -9 -12   1 4.18718 3.07516   4
  -9 -12   1 6.33373 2.45991   9
  -9 -12   1 9.41539 3.12206   5
   8  12  -1 126.698 10.7352   2
   8  12  -1 121.568 8.50415  11
   8  12  -1 129.176 10.9817  10
  -8 -12   1 109.468 8.38942   5
  -8 -12   1 126.774 9.17351   6
  -8 -12   1 114.504 6.68409   9
  -8 -12   1 131.536 9.99440   4
   7  12  -1 234.039 14.4033   2
   7  12  -1 212.913 11.3197   4
   7  12  -1 218.860 11.1829  11
   7  12  -1 218.220 14.0925  10
  -7 -12   1 234.673 13.0415   4
  -7 -12   1 220.565 11.4476   5
  -7 -12   1 211.726 8.57853   9
  -7 -12   1 213.678 11.8490   6
   6  12  -1 11.5364 3.03275  11
   6  12  -1 8.50859 4.32592  10
   6  12  -1 16.5203 5.02872   2
   6  12  -1 11.9185 2.86583   4
  -6 -12   1 3.11254 3.16576  10
  -6 -12   1 12.7750 3.34594   5
  -6 -12   1 10.4824 3.30925   6
   5  12  -1 41.4133 12.3915   1
   5  12  -1 52.3501 5.05855  11
   5  12  -1 57.1195 7.16440   2
   5  12  -1 42.8203 4.67039   6
   5  12  -1 42.8104 4.72900   4
   5  12  -1 53.0904 6.61848  10
   5  12  -1 72.5760 16.3356   1
  -5 -12   1 47.7178 5.33220   6
  -5 -12   1 52.1722 4.80942   5
  -5 -12   1 48.0222 7.40189  10
   4  12  -1 -5.1031 5.56611   1
   4  12  -1 3.34615 2.61691  10
   4  12  -1 3.02969 4.24286   1
   4  12  -1 5.43036 2.15129   3
   4  12  -1 1.78567 2.30217   2
   4  12  -1 -0.5052 1.34102  11
   4  12  -1 -1.1995 1.34622   4
  -4 -12   1 3.68728 1.68805   5
  -4 -12   1 -3.8897 1.98848  10
  -4 -12   1 1.65273 1.74938   6
   3  12  -1 70.9046 5.62216   6
   3  12  -1 52.2330 11.9651   1
   3  12  -1 63.4555 6.29697   3
   3  12  -1 81.7407 6.20691   5
   3  12  -1 73.8911 12.3525   1
   3  12  -1 85.1860 8.40398   2
   3  12  -1 71.2374 7.66052  10
   3  12  -1 63.2200 5.37331  11
   3  12  -1 68.9746 6.75986   7
   3  12  -1 68.9399 5.33262   4
  -3 -12   1 79.5176 6.62591   6
  -3 -12   1 83.4130 5.39270   5
  -3 -12   1 63.4569 7.23588  10
   2  12  -1 2.78539 2.32538   5
   2  12  -1 0.82307 2.08950   2
   2  12  -1 -0.8421 1.37117   4
   2  12  -1 -2.2585 1.84238   7
   2  12  -1 -0.4276 1.99931  10
   2  12  -1 1.80289 1.69686   6
   2  12  -1 6.76827 5.16569   1
   2  12  -1 4.49699 6.38664   1
   2  12  -1 0.43259 1.95561   3
  -2 -12   1 2.41207 2.85431  10
  -2 -12   1 1.93702 1.65999   5
  -2 -12   1 1.51620 1.78330   6
   1  12  -1 75.2505 5.57303   6
   1  12  -1 67.2574 7.46400  10
   1  12  -1 67.2350 6.42424   7
   1  12  -1 73.5789 7.18721   5
   1  12  -1 58.6930 5.93296   3
   1  12  -1 73.0144 5.14618   4
   1  12  -1 70.4126 7.64915   2
  -1 -12   1 66.8940 8.15705  10
  -1 -12   1 77.1061 5.58018   5
  -1 -12   1 69.5366 5.88096   6
   0  12  -1 54.4626 5.84086   7
   0  12  -1 52.3994 5.84098   3
   0  12  -1 51.9383 4.76547   4
   0  12  -1 53.9512 6.91201   5
   0  12  -1 54.5702 6.94448   2
   0  12  -1 52.1570 6.81000  10
   0  12  -1 51.4021 4.45435   6
  -1  12  -1 331.442 16.8244   2
  -1  12  -1 311.707 17.2223   3
  -1  12  -1 310.729 17.0502   5
  -1  12  -1 306.373 14.2904   7
  -1  12  -1 343.591 17.5849  10
  -1  12  -1 312.185 11.1633   4
   1 -12   1 326.304 12.6509   6
  -2  12  -1 50.5686 7.76880   5
  -2  12  -1 55.0123 7.70001  10
  -2  12  -1 62.0865 4.15607   4
  -2  12  -1 62.4398 4.16302   4
  -2  12  -1 59.0904 7.33328   2
   2 -12   1 54.1177 5.03629   6
  -3  12  -1 4.25759 3.26364   5
  -3  12  -1 -3.6876 2.20934   2
  -3  12  -1 -0.3665 2.05626   7
  -3  12  -1 2.42992 3.14321  10
  -3  12  -1 5.10338 5.30737   3
  -3  12  -1 4.07665 2.80239  11
  -3  12  -1 2.06902 1.56835   9
   3 -12   1 2.19708 2.11626   6
  -4  12  -1 8.98664 4.14497   5
  -4  12  -1 14.7948 8.51304   3
  -4  12  -1 14.3396 4.45046   2
  -4  12  -1 -0.9795 3.74477  11
  -4  12  -1 7.35899 3.66725  10
  -4  12  -1 11.5130 2.75605   9
  -5  12  -1 30.1478 10.1361   3
  -5  12  -1 46.6809 7.92667   5
  -5  12  -1 53.2306 5.13406   9
  -5  12  -1 66.4625 8.06690   2
  -5  12  -1 57.8436 8.77287  10
  -5  12  -1 46.1665 6.54794   7
  -5  12  -1 37.0272 5.07376   7
  -6  12  -1 -2.5440 2.49761   7
  -6  12  -1 -3.2942 3.26039   7
  -6  12  -1 3.73655 4.31654  10
  -6  12  -1 -2.5548 6.90074   3
  -6  12  -1 2.23996 2.40032   9
  -6  12  -1 5.49960 3.10006   2
  -6  12  -1 -5.7976 2.60159   5
  -7  12  -1 64.0121 8.97845   3
  -7  12  -1 44.7763 6.16211   7
  -7  12  -1 40.6736 4.81127   7
  -7  12  -1 52.3353 10.7185   2
  -7  12  -1 38.0943 5.95833   9
  -7  12  -1 46.3820 8.56921  10
  -7  12  -1 56.3009 8.24132   5
  -8  12  -1 10.6463 4.30712   5
  -8  12  -1 9.32440 4.33842   2
  -8  12  -1 8.18232 3.42033   8
  -8  12  -1 5.25225 2.90647   9
  -8  12  -1 8.19709 5.52026  10
  -9  12  -1 51.9769 7.11866   8
  -9  12  -1 37.4982 8.17235   5
  -9  12  -1 56.7425 8.51168   2
  -9  12  -1 29.0682 5.63325   9
  -9  12  -1 27.3438 8.50606  10
  16  11  -1 4.86026 3.85529  11
  16  11  -1 9.77631 3.55599   8
  16  11  -1 1.52759 5.47698   2
 -16 -11   1 5.31319 3.33778   6
 -16 -11   1 4.10705 3.58893   9
 -16 -11   1 3.28378 3.44519   4
  15  11  -1 20.7986 7.86961   2
  15  11  -1 34.8099 5.87190   8
  15  11  -1 20.8079 6.05953  11
 -15 -11   1 29.5437 7.58117   4
 -15 -11   1 33.1676 8.65998   9
 -15 -11   1 33.6728 6.47611   6
  14  11  -1 131.097 9.60233   8
  14  11  -1 102.030 18.0088  11
  14  11  -1 126.926 13.1371   2
 -14 -11   1 142.985 11.2023   9
 -14 -11   1 138.839 12.1333   4
 -14 -11   1 153.080 10.7342   6
  13  11  -1 7.83491 3.51430   8
  13  11  -1 17.7308 5.90527   2
  13  11  -1 1.63273 3.03199  11
 -13 -11   1 0.22865 3.32976   4
 -13 -11   1 4.49376 3.36623   9
 -13 -11   1 2.84372 2.81708   6
  12  11  -1 256.395 17.2257   2
  12  11  -1 274.445 18.6284  10
  12  11  -1 304.536 14.4926   8
  12  11  -1 281.037 15.4735  11
 -12 -11   1 275.235 16.4094   4
 -12 -11   1 287.724 14.7610   6
 -12 -11   1 282.747 14.3677   9
  11  11  -1 171.902 10.6896   8
  11  11  -1 160.623 11.0404  11
  11  11  -1 146.907 12.3139   2
  11  11  -1 157.850 13.9235  10
 -11 -11   1 156.510 11.8499   4
 -11 -11   1 162.205 10.7872   6
 -11 -11   1 167.063 10.1251   9
 -11 -11   1 150.526 11.4379   5
  10  11  -1 212.095 14.4277   2
  10  11  -1 213.658 12.2665  11
  10  11  -1 220.533 12.1827   8
  10  11  -1 228.019 15.5875  10
 -10 -11   1 202.307 12.5560   5
 -10 -11   1 203.502 12.0640  11
 -10 -11   1 219.976 11.1656   9
 -10 -11   1 213.284 12.2430   6
 -10 -11   1 207.017 13.1533   4
   9  11  -1 2.15914 1.75844  11
   9  11  -1 3.55708 2.44348   8
   9  11  -1 4.95236 3.19317  10
   9  11  -1 8.33621 3.80953   2
  -9 -11   1 8.67687 2.53718   9
  -9 -11   1 -2.0723 1.82803   6
  -9 -11   1 4.79850 2.35516   5
   8  11  -1 4.66757 2.90558   2
   8  11  -1 1.10954 1.61074  11
   8  11  -1 2.69345 2.72074  10
   8  11  -1 -1.5960 1.93317   4
  -8 -11   1 1.51102 2.04394   6
  -8 -11   1 0.93181 1.46485   9
  -8 -11   1 0.42005 2.25650   4
  -8 -11   1 -1.5114 1.82080   5
   7  11  -1 32.1142 4.38678   4
   7  11  -1 32.1056 6.52162  10
   7  11  -1 27.1653 11.0121   1
   7  11  -1 23.4862 5.52154   2
  -7 -11   1 23.8090 4.90457  10
  -7 -11   1 27.5436 5.26309   4
  -7 -11   1 27.3767 4.87380   6
  -7 -11   1 24.2520 6.08095   2
  -7 -11   1 33.9534 3.40639   9
   6  11  -1 429.872 16.9451   4
   6  11  -1 460.018 16.6813  11
   6  11  -1 453.852 32.5782   1
   6  11  -1 451.939 19.1920   7
   6  11  -1 498.735 36.3132   1
   6  11  -1 448.159 17.2349   6
   6  11  -1 476.822 20.6536   2
   6  11  -1 496.510 20.7709  10
  -6 -11   1 478.067 18.9654   4
  -6 -11   1 477.626 18.0882   6
  -6 -11   1 486.742 17.2605   5
  -6 -11   1 459.261 19.2184   2
  -6 -11   1 434.147 19.0136  10
   5  11  -1 43.9738 5.28917   3
   5  11  -1 39.7761 5.21401   7
   5  11  -1 42.8782 4.52918  11
   5  11  -1 47.2510 6.31395   2
   5  11  -1 47.9376 11.6234   1
   5  11  -1 44.7898 12.5410   1
   5  11  -1 48.4578 4.86016   6
   5  11  -1 35.6848 4.12100   4
   5  11  -1 54.7298 6.51468  10
  -5 -11   1 42.1178 4.93565   6
  -5 -11   1 47.9608 6.08975  10
   4  11  -1 59.2669 12.3579   1
   4  11  -1 52.8081 6.45373  10
   4  11  -1 60.2418 6.17567   7
   4  11  -1 64.5652 6.03242   3
   4  11  -1 63.9908 6.97362   2
   4  11  -1 56.0527 13.0237   1
   4  11  -1 67.2461 5.19957  11
   4  11  -1 48.3346 4.75685   4
  -4 -11   1 60.9966 4.81350   5
  -4 -11   1 65.7783 7.01994  10
  -4 -11   1 59.6385 5.51084   6
   3  11  -1 718.199 21.2217  11
   3  11  -1 688.450 21.1566   4
   3  11  -1 690.524 25.1125  10
   3  11  -1 628.536 36.8741   1
   3  11  -1 705.251 25.7962   2
   3  11  -1 714.607 21.6985   5
   3  11  -1 650.607 30.7836   3
   3  11  -1 661.531 23.9102   7
   3  11  -1 679.378 21.5756   6
   3  11  -1 685.072 41.0588   1
  -3 -11   1 708.695 22.4124   6
  -3 -11   1 681.841 24.5427  10
  -3 -11   1 688.723 20.0586   5
   2  11  -1 685.414 24.6146  10
   2  11  -1 665.055 22.4857   3
   2  11  -1 664.908 21.6318   5
   2  11  -1 703.532 36.6402   1
   2  11  -1 662.871 20.1794   4
   2  11  -1 548.622 39.9700   1
   2  11  -1 657.367 24.5840   2
   2  11  -1 671.482 20.8436   6
  -2 -11   1 686.243 21.5581   6
  -2 -11   1 671.059 24.3551  10
   1  11  -1 68.4026 4.64531   4
   1  11  -1 66.8612 6.34715   5
   1  11  -1 56.2964 5.87406   7
   1  11  -1 60.4541 6.81208   2
   1  11  -1 55.7222 4.68239   6
   1  11  -1 61.2543 10.2752   1
   1  11  -1 59.1876 10.2744   1
   1  11  -1 54.1817 5.51174   3
   1  11  -1 70.4290 7.13962  10
  -1 -11   1 64.0308 5.52325   6
  -1 -11   1 57.9091 4.58108   5
  -1 -11   1 67.7932 7.55269  10
   0  11  -1 29.7369 3.70304   4
   0  11  -1 37.0985 5.35408   3
   0  11  -1 32.3125 3.55593   6
   0  11  -1 23.0418 7.67838   1
   0  11  -1 37.5423 8.53971   1
   0  11  -1 30.5981 5.62636   5
   0  11  -1 35.3989 6.14030  10
   0  11  -1 36.9263 5.69253   2
   0 -11   1 34.6156 3.95525   6
  -1  11  -1 99.3785 12.7388   1
  -1  11  -1 62.7656 7.44513   5
  -1  11  -1 65.2905 4.40571   4
  -1  11  -1 57.8686 4.53711   6
  -1  11  -1 73.4629 7.32285   2
  -1  11  -1 89.8773 9.55606   1
  -1  11  -1 55.1068 5.64785   3
  -1  11  -1 73.9703 7.57430  10
   1 -11   1 68.1684 5.21819   6
  -2  11  -1 166.473 13.9966   5
  -2  11  -1 186.020 12.7381  10
  -2  11  -1 181.469 7.59605   4
  -2  11  -1 173.925 7.22534   4
  -2  11  -1 170.628 9.93679   3
  -2  11  -1 168.577 11.3710   2
   2 -11   1 169.175 7.99850   6
  -3  11  -1 181.403 12.0155   5
  -3  11  -1 181.589 13.2561  10
  -3  11  -1 172.998 7.69406   9
  -3  11  -1 155.467 10.2036   3
  -3  11  -1 167.015 9.43188   7
  -3  11  -1 171.209 11.6241   2
  -3  11  -1 173.637 6.98381   4
  -3  11  -1 181.068 10.6682  11
  -3  11  -1 169.342 7.51152   4
   3 -11   1 174.412 7.95284   6
  -4  11  -1 5.89644 2.20590   9
  -4  11  -1 6.53482 4.31041  10
  -4  11  -1 1.98505 2.58691  11
  -4  11  -1 5.83384 1.58486   4
  -4  11  -1 8.01505 3.70380   3
  -4  11  -1 7.96337 3.73106   5
  -4  11  -1 10.2657 3.53485   2
  -4  11  -1 6.67234 2.41995   7
  -5  11  -1 125.339 10.5337   3
  -5  11  -1 133.208 12.1792  10
  -5  11  -1 122.774 16.1205  11
  -5  11  -1 123.251 7.75590   7
  -5  11  -1 163.549 11.2639   2
  -5  11  -1 125.963 8.94505   7
  -5  11  -1 129.267 7.81910   9
  -5  11  -1 138.675 10.8382   5
  -6  11  -1 166.052 12.2548   5
  -6  11  -1 173.701 8.62189   7
  -6  11  -1 159.925 9.53448   9
  -6  11  -1 168.786 12.0973   2
  -6  11  -1 169.049 11.5388   3
  -6  11  -1 161.305 10.4060   7
  -6  11  -1 146.745 13.4611  10
  -7  11  -1 49.0749 7.11481   3
  -7  11  -1 47.5240 8.87178  10
  -7  11  -1 56.9839 6.19224   7
  -7  11  -1 69.2032 6.69255   9
  -7  11  -1 65.6679 5.17873   7
  -7  11  -1 68.3124 8.48737   5
  -8  11  -1 29.3182 7.66349  10
  -8  11  -1 32.6822 5.75719   9
  -8  11  -1 42.6168 6.17993   8
  -8  11  -1 22.2971 6.41087   5
  -9  11  -1 10.6406 5.03301   5
  -9  11  -1 23.2131 4.41448   8
  -9  11  -1 22.7785 5.92194  10
  -9  11  -1 27.1035 5.32473   9
 -10  11  -1 -2.0121 2.94687   9
 -10  11  -1 6.12526 3.34678   8
 -10  11  -1 -1.3083 5.41735  10
 -10  11  -1 3.49904 4.72167   5
  17  10  -1 15.0704 9.04593   2
  17  10  -1 18.6825 6.69292  11
 -17 -10   1 31.0275 6.77195   9
 -17 -10   1 28.0877 5.68251   6
 -17 -10   1 37.6248 7.71064   4
  16  10  -1 10.0508 5.86128   2
 -16 -10   1 0.85304 2.25497   6
 -16 -10   1 1.89546 3.31741   9
 -16 -10   1 1.19956 3.35615   4
  15  10  -1 -1.5234 2.51327   8
  15  10  -1 0.39966 2.60128  11
  15  10  -1 6.44719 6.13967   2
 -15 -10   1 -0.9445 3.14759   4
 -15 -10   1 1.51055 2.65130   6
 -15 -10   1 -2.6613 2.62807   9
  14  10  -1 2.02612 3.80947   2
  14  10  -1 1.84994 2.60650   8
  14  10  -1 8.06668 5.54004  11
 -14 -10   1 -2.0488 1.99220   6
 -14 -10   1 6.67199 4.22075   4
 -14 -10   1 2.56183 2.99673   9
  13  10  -1 161.597 14.0988   2
  13  10  -1 172.208 10.3635   8
  13  10  -1 166.374 12.1680  11
 -13 -10   1 172.302 14.1503   4
 -13 -10   1 173.976 11.2376   6
 -13 -10   1 166.586 11.4368   9
  12  10  -1 46.5452 8.57115   2
  12  10  -1 45.3256 6.72847  11
  12  10  -1 43.0956 5.63455   8
 -12 -10   1 48.8376 7.08994   4
 -12 -10   1 47.5445 6.24651   9
 -12 -10   1 49.1068 6.20650   6
  11  10  -1 486.539 24.5860  10
  11  10  -1 487.576 18.6951   8
  11  10  -1 472.724 22.5897   2
  11  10  -1 492.796 20.6555  11
 -11 -10   1 454.027 21.0655   5
 -11 -10   1 477.933 18.8269   9
 -11 -10   1 480.973 21.5818   4
 -11 -10   1 466.310 19.3248   6
  10  10  -1 125.676 11.5143  10
  10  10  -1 125.381 9.13364  11
  10  10  -1 126.288 8.62446   8
  10  10  -1 125.757 10.8319   2
 -10 -10   1 113.089 8.67906   6
 -10 -10   1 122.970 9.89902   4
 -10 -10   1 106.327 9.42744   5
 -10 -10   1 133.212 8.36965   9
 -10 -10   1 113.671 8.87283  11
   9  10  -1 30.0618 6.38265   2
   9  10  -1 27.1813 6.05798  10
   9  10  -1 25.6334 4.86851   8
   9  10  -1 22.4573 4.35940  11
  -9 -10   1 16.7817 3.74887   6
  -9 -10   1 28.7969 5.58380   2
  -9 -10   1 20.2905 4.75986   4
  -9 -10   1 31.0851 5.62845   5
  -9 -10   1 22.5899 4.01751   9
   8  10  -1 70.3661 6.18899  11
   8  10  -1 66.0488 7.21727   2
   8  10  -1 61.4770 6.45975   6
   8  10  -1 75.8728 6.91491   7
   8  10  -1 61.9134 5.98599   4
   8  10  -1 67.5401 7.90635  10
   8  10  -1 40.6620 13.5607   1
  -8 -10   1 52.4708 16.4486   1
  -8 -10   1 63.8660 6.59484   4
  -8 -10   1 71.1847 6.33565   6
  -8 -10   1 69.4242 5.24201   9
  -8 -10   1 65.5500 6.41842   2
  -8 -10   1 50.7571 5.95251   5
  -8 -10   1 66.0695 7.14314  10
   7  10  -1 11.3603 3.79125  10
   7  10  -1 4.92219 2.13629   6
   7  10  -1 8.07584 2.54261   4
   7  10  -1 9.36192 3.08377   7
   7  10  -1 11.8557 3.97181   2
   7  10  -1 11.0383 7.89921   1
   7  10  -1 11.7272 2.90892  11
  -7 -10   1 5.58538 2.88576   2
  -7 -10   1 11.5740 3.07623  10
  -7 -10   1 10.8043 2.32982   9
  -7 -10   1 8.05624 2.97387   4
  -7 -10   1 5.67486 2.57196   5
  -7 -10   1 9.42013 2.75346   6
  -7 -10   1 13.9663 8.79072   1
   6  10  -1 11.7531 3.85660  10
   6  10  -1 15.1626 3.20437  11
   6  10  -1 -0.3121 5.58158   1
   6  10  -1 13.9973 3.49909   7
   6  10  -1 12.8444 3.17684   6
   6  10  -1 20.1431 3.73418   4
   6  10  -1 16.3116 4.33200   2
  -6 -10   1 16.6253 3.54903   6
  -6 -10   1 12.6695 3.25754   4
  -6 -10   1 14.3810 3.31103   5
  -6 -10   1 8.62614 2.76760  10
  -6 -10   1 13.5478 3.55037   2
  -6 -10   1 17.6910 2.68308   9
   5  10  -1 234.803 22.6586   1
   5  10  -1 250.260 10.6137  11
   5  10  -1 225.602 10.6997   6
   5  10  -1 248.002 21.3830   1
   5  10  -1 245.585 13.2818   2
   5  10  -1 244.855 10.9195   4
   5  10  -1 239.808 13.1273  10
  -5 -10   1 227.854 12.1829  10
  -5 -10   1 246.624 10.8795   5
  -5 -10   1 251.569 11.5674   6
  -5 -10   1 250.682 12.1876   4
   4  10  -1 30.3396 4.69216   3
   4  10  -1 28.6344 3.45611  11
   4  10  -1 20.9545 3.13837   4
   4  10  -1 37.9225 9.53651   1
   4  10  -1 34.6204 10.0681   1
   4  10  -1 25.7018 3.98012   6
   4  10  -1 31.6132 4.89525   2
   4  10  -1 24.0165 4.65048   7
   4  10  -1 25.1044 4.93030  10
  -4 -10   1 23.6810 3.66572   5
  -4 -10   1 23.8628 4.00012   6
  -4 -10   1 26.7081 4.93098  10
   3  10  -1 54.6452 5.61006   7
   3  10  -1 59.1361 4.69751   6
   3  10  -1 46.6837 10.5536   1
   3  10  -1 58.8372 5.43013   3
   3  10  -1 55.3405 6.20318   2
   3  10  -1 57.8614 4.67309   5
   3  10  -1 42.1878 10.9178   1
   3  10  -1 61.8130 4.67798  11
   3  10  -1 57.4410 4.61973   4
   3  10  -1 57.6612 6.27254  10
  -3 -10   1 62.0417 6.57171   6
  -3 -10   1 61.3007 5.97742  10
  -3 -10   1 51.7533 4.10359   5
   2  10  -1 260.832 13.4394   2
   2  10  -1 264.548 15.7935  10
   2  10  -1 266.809 11.8489   3
   2  10  -1 262.731 10.4340   4
   2  10  -1 247.607 20.1271   1
   2  10  -1 260.933 19.7988   1
   2  10  -1 253.241 10.5862   6
   2  10  -1 284.029 11.6007   5
  -2 -10   1 276.947 11.3978   6
  -2 -10   1 259.864 12.8925  10
  -2 -10   1 267.075 9.96469   5
   1  10  -1 206.418 16.3846   1
   1  10  -1 232.752 9.72419   6
   1  10  -1 251.340 12.9419   2
   1  10  -1 236.180 12.6119  10
   1  10  -1 246.262 11.2000   3
   1  10  -1 247.093 11.7159   5
  -1 -10   1 248.465 12.8572  10
  -1 -10   1 238.963 9.80479   5
  -1 -10   1 252.731 10.5224   6
   0  10  -1 164.611 7.59048   6
   0  10  -1 151.622 13.8485   1
   0  10  -1 163.247 7.34736   4
   0  10  -1 150.510 14.4871   1
   0  10  -1 171.385 10.6221  10
   0  10  -1 159.031 10.0704   5
   0  10  -1 164.381 10.2857   2
   0  10  -1 173.896 8.99607   3
   0 -10   1 168.391 7.93347   5
   0 -10   1 165.471 8.00858   6
  -1  10  -1 22.6054 7.49742   1
  -1  10  -1 17.9573 2.58879   6
  -1  10  -1 25.6194 5.12148  10
  -1  10  -1 20.0383 4.40834   5
  -1  10  -1 22.3601 4.67593   2
  -1  10  -1 23.2854 3.58549   3
  -1  10  -1 24.8010 5.32235   1
  -1  10  -1 19.5787 2.69741   4
   1 -10   1 22.3574 3.01554   6
  -2  10  -1 -0.7555 2.11116  10
  -2  10  -1 -0.6926 1.90453   2
  -2  10  -1 -0.8325 0.97327   9
  -2  10  -1 8.35968 2.92681   5
  -2  10  -1 -1.6175 1.04856   6
  -2  10  -1 -1.0190 1.83095   3
  -2  10  -1 2.51729 1.41999   4
   2 -10   1 0.53770 1.36861   6
  -3  10  -1 11.2597 3.65029   2
  -3  10  -1 22.5617 6.06510  10
  -3  10  -1 22.2505 4.35908   3
  -3  10  -1 26.5649 4.62203  11
  -3  10  -1 18.3019 2.63534   4
  -3  10  -1 20.1477 2.97054   9
  -3  10  -1 19.5949 4.90395   5
   3 -10   1 25.9273 2.99998   6
  -4  10  -1 39.9973 5.93974   5
  -4  10  -1 28.9776 5.39371   3
  -4  10  -1 35.0351 5.44428  11
  -4  10  -1 37.2234 3.28224   4
  -4  10  -1 44.3632 8.11286  10
  -4  10  -1 32.0431 3.96788   9
  -4  10  -1 28.1843 5.30215   2
  -5  10  -1 6.96592 2.68261   9
  -5  10  -1 7.44113 3.82834  10
  -5  10  -1 3.11660 3.10512  11
  -5  10  -1 4.10219 1.73753   4
  -5  10  -1 -1.0896 3.51475   3
  -5  10  -1 3.42865 2.69615   7
  -5  10  -1 7.33355 3.35310   5
  -6  10  -1 126.507 7.12864   7
  -6  10  -1 134.514 8.62192   9
  -6  10  -1 129.213 6.41671   4
  -6  10  -1 115.193 11.4496  10
  -6  10  -1 109.371 8.62985   7
  -6  10  -1 130.836 10.3026   5
  -6  10  -1 119.415 9.61281   3
  -7  10  -1 255.298 10.1861   7
  -7  10  -1 244.820 11.5699   7
  -7  10  -1 267.603 12.8734   3
  -7  10  -1 242.632 13.0511   8
  -7  10  -1 265.180 15.2740   5
  -7  10  -1 288.985 13.5048   9
  -7  10  -1 273.229 10.1843   4
  -7  10  -1 230.757 16.9321  10
  -8  10  -1 1.86830 2.82520   8
  -8  10  -1 9.24601 4.93515  10
  -8  10  -1 4.45740 2.87791   9
  -8  10  -1 -2.8244 3.65505   8
  -8  10  -1 2.94093 1.95172   4
  -8  10  -1 3.66100 3.23552   5
  -9  10  -1 16.5105 6.16432  10
  -9  10  -1 19.3602 3.96127   8
  -9  10  -1 9.98242 4.14472   9
  -9  10  -1 24.8320 6.87146   8
  -9  10  -1 23.1588 5.69560   5
  -9  10  -1 17.1013 3.08322   4
 -10  10  -1 0.68001 2.75937   8
 -10  10  -1 -8.8483 3.96135  10
 -10  10  -1 -1.8524 2.86133   9
 -10  10  -1 -3.6518 3.37956   4
  17   9  -1 -7.6146 5.40692   2
  17   9  -1 -0.0920 3.16162  11
 -17  -9   1 6.32824 3.16203   6
 -17  -9   1 3.74212 3.76375   9
 -17  -9   1 8.80911 4.56787   4
  16   9  -1 2.42571 4.20689  11
  16   9  -1 -9.1913 4.76541   2
 -16  -9   1 3.21317 2.86510   6
 -16  -9   1 5.59137 3.89402   4
 -16  -9   1 -2.3191 3.33048   9
  15   9  -1 11.8822 5.44465  11
  15   9  -1 15.0102 3.77657   8
  15   9  -1 10.0436 6.01885   2
 -15  -9   1 12.6267 4.90458   9
 -15  -9   1 8.07862 4.75129   4
  14   9  -1 738.820 26.0496   8
  14   9  -1 752.594 31.3476  11
  14   9  -1 760.295 33.5817   2
 -14  -9   1 799.215 31.4929   4
 -14  -9   1 763.436 27.2120   6
 -14  -9   1 780.499 29.3241   9
  13   9  -1 20.5864 5.44418  11
  13   9  -1 22.0346 4.56686   8
  13   9  -1 28.3071 7.31057   2
 -13  -9   1 20.7120 5.09698   9
 -13  -9   1 12.7973 4.80424   4
 -13  -9   1 17.0691 4.06535   6
  12   9  -1 4.18067 3.03745   8
  12   9  -1 8.40691 4.45252   2
  12   9  -1 12.8772 3.87522  11
 -12  -9   1 4.96682 2.66696   6
 -12  -9   1 9.15779 3.60271   9
 -12  -9   1 9.66837 4.23225   4
  11   9  -1 28.8999 6.27930   2
  11   9  -1 33.0301 4.67958   8
  11   9  -1 33.9693 6.12121  11
 -11  -9   1 40.9007 5.40069   9
 -11  -9   1 36.2967 5.72006   6
 -11  -9   1 25.8571 5.39324   5
 -11  -9   1 36.7349 6.69843   4
  10   9  -1 58.7035 6.73417  11
  10   9  -1 59.2976 5.88373   8
  10   9  -1 59.4904 7.32017   2
  10   9  -1 56.0185 7.83566  10
  10   9  -1 59.6077 6.68203   7
 -10  -9   1 72.3117 6.91991   2
 -10  -9   1 55.6936 7.12845   5
 -10  -9   1 72.8882 6.45400   9
 -10  -9   1 62.9607 6.25903   6
 -10  -9   1 67.5172 7.17200   4
 -10  -9   1 67.2818 6.70274  11
   9   9  -1 42.0211 5.22505   4
   9   9  -1 42.7330 6.67584  10
   9   9  -1 36.2401 5.06260  11
   9   9  -1 42.6529 6.07328   2
   9   9  -1 43.3130 12.4580   1
   9   9  -1 41.4727 4.90492   8
   9   9  -1 41.2566 6.37394   7
   9   9  -1 39.5540 4.82528   6
  -9  -9   1 39.3466 5.54705   4
  -9  -9   1 34.8114 4.80295   6
  -9  -9   1 32.6672 4.96237  11
  -9  -9   1 35.1307 4.41994   9
  -9  -9   1 43.6378 5.82348   5
  -9  -9   1 36.0404 5.11219   2
  -9  -9   1 11.1897 9.99307   1
  -9  -9   1 39.9188 6.84883  10
   8   9  -1 9.37276 2.44146   6
   8   9  -1 7.82739 2.63535  11
   8   9  -1 2.27955 5.93524   1
   8   9  -1 4.92955 2.27969   8
   8   9  -1 3.14854 1.96795   4
   8   9  -1 9.67226 3.62869   2
   8   9  -1 7.35463 2.54040   7
   8   9  -1 4.50796 3.16514  10
  -8  -9   1 8.51216 2.88600   4
  -8  -9   1 6.77612 2.78001  11
  -8  -9   1 6.94218 2.63570   6
  -8  -9   1 3.97639 2.38523   5
  -8  -9   1 3.22476 6.68606   1
  -8  -9   1 10.6888 3.07443   2
  -8  -9   1 8.11472 3.06973  10
  -8  -9   1 8.73012 2.46804   9
   7   9  -1 21.2294 5.17532   7
   7   9  -1 22.3294 4.85541   2
   7   9  -1 22.5020 8.58264   1
   7   9  -1 23.2718 4.20856   4
   7   9  -1 17.0200 4.20048  10
   7   9  -1 21.9223 4.64317   6
   7   9  -1 26.0148 3.75270  11
  -7  -9   1 19.9906 2.99775   9
  -7  -9   1 28.2917 4.98262  10
  -7  -9   1 14.3612 3.44332   5
  -7  -9   1 20.7049 3.84614  11
  -7  -9   1 27.3814 4.19730   2
  -7  -9   1 21.6614 4.15807   4
  -7  -9   1 28.0108 11.4421   1
  -7  -9   1 15.8629 3.41702   6
   6   9  -1 1018.88 31.3864   7
   6   9  -1 1046.41 32.8366   2
   6   9  -1 1065.26 29.3502  11
   6   9  -1 1003.78 51.0798   1
   6   9  -1 1009.79 29.7021   4
   6   9  -1 1068.81 33.2867  10
   6   9  -1 1004.89 29.3549   6
  -6  -9   1 1039.10 54.0435   1
  -6  -9   1 1014.80 29.8540   6
  -6  -9   1 1042.77 35.1001   5
  -6  -9   1 1042.08 26.7872   9
  -6  -9   1 931.003 34.4403   4
  -6  -9   1 1016.86 31.4177   2
  -6  -9   1 1010.79 31.6917  10
   5   9  -1 315.395 14.8364   2
   5   9  -1 307.641 25.0829   1
   5   9  -1 316.983 12.0856  11
   5   9  -1 301.154 12.3936   6
   5   9  -1 319.028 12.6614   4
   5   9  -1 301.279 13.7729   7
  -5  -9   1 321.778 14.1055  10
  -5  -9   1 324.981 12.5146   5
  -5  -9   1 304.726 13.7383   2
  -5  -9   1 309.648 13.4682   4
  -5  -9   1 305.231 12.7604   6
  -5  -9   1 299.928 26.3991   1
  -5  -9   1 301.622 9.89710   9
   4   9  -1 5.26483 2.60012   2
   4   9  -1 6.70791 2.01025  11
   4   9  -1 1.48072 1.67957  10
   4   9  -1 5.62805 4.61451   1
   4   9  -1 2.45687 1.51246   4
   4   9  -1 3.75310 2.08616   7
   4   9  -1 1.93321 1.21469   6
  -4  -9   1 5.02614 2.12869   2
  -4  -9   1 3.05814 1.64008   6
  -4  -9   1 2.75014 1.79816  10
  -4  -9   1 2.94944 1.59456   5
  -4  -9   1 1.72172 1.76068   4
   3   9  -1 1.24894 1.40758   7
   3   9  -1 -1.6402 0.99321   4
   3   9  -1 -1.1678 0.93635   3
   3   9  -1 0.73803 3.11600   1
   3   9  -1 1.19466 1.05116  11
   3   9  -1 1.60669 1.39859   2
   3   9  -1 1.02587 1.27906   5
   3   9  -1 0.56147 1.06202   6
   3   9  -1 0.98092 3.02513   1
   3   9  -1 -0.6514 1.45389  10
  -3  -9   1 -1.9970 1.25350  10
  -3  -9   1 0.17229 1.21512   6
  -3  -9   1 -1.5691 0.94767   5
   2   9  -1 14.1107 2.84704   5
   2   9  -1 10.2487 5.15558   1
   2   9  -1 10.4350 3.50710   2
   2   9  -1 13.7576 3.30535  10
   2   9  -1 11.2505 5.46197   1
   2   9  -1 14.7055 2.60580   6
   2   9  -1 14.7608 3.06613   3
   2   9  -1 13.1727 3.01018   4
  -2  -9   1 15.3142 3.64994  10
  -2  -9   1 18.7472 3.15015   6
  -2  -9   1 11.2321 2.12867   5
   1   9  -1 69.6613 4.66436   6
   1   9  -1 63.2177 6.04063  10
   1   9  -1 64.8271 5.48712   5
   1   9  -1 63.9725 8.70146   1
   1   9  -1 65.4749 4.42268   4
   1   9  -1 78.5319 10.1383   1
   1   9  -1 61.4864 5.06153   3
   1   9  -1 69.9793 6.43202   2
  -1  -9   1 67.3892 6.28637  10
  -1  -9   1 69.3252 4.91560   6
  -1  -9   1 66.7470 4.32941   5
   0   9  -1 215.569 15.5467   1
   0   9  -1 242.878 12.0263   2
   0   9  -1 233.012 9.16695   6
   0   9  -1 244.598 12.1854  10
   0   9  -1 244.321 10.4749   3
   0   9  -1 249.990 16.5968   1
   0   9  -1 232.486 8.97025   4
   0   9  -1 225.497 11.3476   5
   0  -9   1 248.537 9.69434   6
   0  -9   1 227.260 9.28053   5
  -1   9  -1 27.0361 4.19886   2
  -1   9  -1 24.0439 4.82852  10
  -1   9  -1 31.9655 6.28616   1
  -1   9  -1 32.3658 4.24305   5
  -1   9  -1 15.3916 6.33123   1
  -1   9  -1 26.6724 2.95036   4
  -1   9  -1 27.7301 2.77856   6
  -1   9  -1 22.1491 3.40883   3
   1  -9   1 28.8696 3.11165   6
  -2   9  -1 511.856 17.9434   3
  -2   9  -1 561.666 19.9387   5
  -2   9  -1 547.974 15.5245   9
  -2   9  -1 563.633 22.2241  10
  -2   9  -1 546.773 15.6423   6
  -2   9  -1 552.165 20.4779   2
   2  -9   1 551.120 16.1416   6
  -3   9  -1 718.569 27.3551  10
  -3   9  -1 732.419 23.5070  11
  -3   9  -1 702.835 23.8166   5
  -3   9  -1 690.559 22.5511   3
  -3   9  -1 719.421 19.2486   4
  -3   9  -1 690.912 18.5509   6
  -3   9  -1 707.309 20.1829   9
   3  -9   1 688.952 19.3362   6
  -4   9  -1 38.3781 4.05168   9
  -4   9  -1 36.9063 5.02077   5
  -4   9  -1 40.4932 3.44393   4
  -4   9  -1 35.7581 6.95019  10
  -4   9  -1 38.1650 5.29409   3
  -4   9  -1 40.5633 5.21577  11
  -5   9  -1 4.29620 2.45152   5
  -5   9  -1 1.45634 2.22390   7
  -5   9  -1 1.40553 2.68850  10
  -5   9  -1 1.79562 1.52420   4
  -5   9  -1 1.03660 1.92189   9
  -5   9  -1 1.31659 2.75277   3
  -5   9  -1 -0.8492 2.70898  11
  -6   9  -1 5.70840 3.57305  11
  -6   9  -1 5.77267 3.21146   3
  -6   9  -1 6.96694 3.09881   7
  -6   9  -1 14.8895 4.36006   5
  -6   9  -1 7.04721 3.01786   9
  -6   9  -1 10.7310 2.41933   4
  -6   9  -1 11.1795 4.13681  10
  -7   9  -1 68.5558 5.96641   7
  -7   9  -1 75.0902 5.38619   4
  -7   9  -1 74.7763 6.50064   7
  -7   9  -1 73.6075 6.83231   8
  -7   9  -1 71.0905 9.43477  10
  -7   9  -1 83.9353 7.38813   9
  -7   9  -1 65.9098 6.60421   3
  -7   9  -1 73.8885 7.81463   5
  -8   9  -1 120.555 12.1467  10
  -8   9  -1 137.229 9.85607   9
  -8   9  -1 141.958 11.2672   5
  -8   9  -1 156.228 7.83694   4
  -8   9  -1 126.613 8.85736   8
  -9   9  -1 -0.0693 3.88335  10
  -9   9  -1 15.0319 3.95322   9
  -9   9  -1 7.30072 3.76005   4
  -9   9  -1 9.84923 3.16147   8
  -9   9  -1 2.83063 3.40804   5
  -9   9  -1 7.98639 3.99246   8
 -10   9  -1 -4.3638 2.71366   5
 -10   9  -1 -0.2542 3.76448   8
 -10   9  -1 -0.5669 2.27600   4
 -10   9  -1 6.96281 2.70923   8
 -10   9  -1 10.7670 5.12168  10
 -10   9  -1 -3.4474 2.77752   9
 -11   9  -1 142.284 11.5015   9
 -11   9  -1 161.319 13.6319   5
 -11   9  -1 139.304 8.52971   4
 -11   9  -1 122.692 14.1976  10
  17   8  -1 15.1829 9.07546   2
  17   8  -1 21.4049 6.85023  11
 -17  -8   1 31.9771 6.87706   4
 -17  -8   1 34.9803 6.13163   6
 -17  -8   1 18.7396 5.54506   9
  16   8  -1 0.59982 4.49315  11
 -16  -8   1 18.4909 4.53938   6
 -16  -8   1 9.25432 4.63721   9
 -16  -8   1 1.24329 3.87831   4
  15   8  -1 114.506 13.5441   2
  15   8  -1 99.0403 7.13561   8
  15   8  -1 101.907 10.8432  11
 -15  -8   1 127.100 11.2968   9
 -15  -8   1 107.297 11.0815   4
 -15  -8   1 114.586 9.18013   6
  14   8  -1 18.0775 3.80106   8
  14   8  -1 11.7437 4.17153  11
  14   8  -1 6.19089 5.42685   2
 -14  -8   1 17.4993 5.15206   9
 -14  -8   1 12.6059 3.66938   6
 -14  -8   1 12.4082 4.74327   4
  13   8  -1 843.715 34.8121   2
  13   8  -1 844.983 32.1062  11
  13   8  -1 888.266 26.3410   8
 -13  -8   1 879.085 31.0386   9
 -13  -8   1 911.649 33.1473   4
 -13  -8   1 884.918 28.8470   6
  12   8  -1 14.3993 3.40000   8
  12   8  -1 18.9654 4.90262  11
  12   8  -1 6.17810 3.87560   2
 -12  -8   1 14.2084 3.83528   6
 -12  -8   1 11.3133 3.64244   9
 -12  -8   1 18.1383 5.19215   4
  11   8  -1 58.3601 6.66947   7
  11   8  -1 61.7788 5.68782   8
  11   8  -1 75.0226 7.63009  11
  11   8  -1 58.2268 7.69829   2
 -11  -8   1 63.0246 6.32792   6
 -11  -8   1 56.1596 7.36631   4
 -11  -8   1 60.0394 6.52707   9
 -11  -8   1 56.6036 6.88593   2
  10   8  -1 5.21793 2.81366  11
  10   8  -1 10.5525 3.56138   2
  10   8  -1 5.25974 2.35390   6
  10   8  -1 9.06275 6.74854   1
  10   8  -1 8.64134 2.80300   7
  10   8  -1 6.78257 3.58869  10
  10   8  -1 8.48336 2.54003   8
 -10  -8   1 0.83128 2.08323  11
 -10  -8   1 6.50283 2.55347   9
 -10  -8   1 5.44784 7.92756   1
 -10  -8   1 4.77980 2.74330   2
 -10  -8   1 6.02682 2.91727   4
 -10  -8   1 2.68443 2.10915   6
   9   8  -1 87.1788 6.44383   8
   9   8  -1 77.2275 17.5643   1
   9   8  -1 87.2749 6.68604   6
   9   8  -1 90.7246 8.32325   2
   9   8  -1 78.4775 6.92809   4
   9   8  -1 85.0871 7.11687  11
   9   8  -1 88.0179 8.93180  10
  -9  -8   1 80.9711 6.62774   6
  -9  -8   1 87.2325 19.2055   1
  -9  -8   1 84.4104 7.55275   4
  -9  -8   1 75.9715 6.66350  11
  -9  -8   1 79.1974 7.76289   9
  -9  -8   1 85.2986 8.06430  10
   8   8  -1 20.5129 5.08149  10
   8   8  -1 22.8683 4.57242   4
   8   8  -1 18.7098 4.31068   2
   8   8  -1 18.2346 3.73399   8
   8   8  -1 16.7462 3.62059   7
   8   8  -1 19.2320 9.08434   1
  -8  -8   1 24.3522 4.12870   6
  -8  -8   1 6.08093 6.69162   1
  -8  -8   1 21.3807 6.39016  10
  -8  -8   1 17.4722 3.44316  11
  -8  -8   1 24.0180 4.86294   5
  -8  -8   1 22.0780 4.40969   4
  -8  -8   1 23.5172 4.49551   2
  -8  -8   1 23.8926 3.53181   9
   7   8  -1 253.749 11.7855   4
   7   8  -1 234.007 23.6384   1
   7   8  -1 256.705 12.2920   7
   7   8  -1 265.294 13.9946  10
   7   8  -1 249.108 11.2123   6
   7   8  -1 267.095 13.5470   2
   7   8  -1 248.282 11.3660  11
  -7  -8   1 253.255 11.3001  11
  -7  -8   1 291.886 27.4990   1
  -7  -8   1 261.322 12.5137   4
  -7  -8   1 257.421 11.5951   6
  -7  -8   1 265.675 10.4826   9
  -7  -8   1 247.458 12.2233   2
  -7  -8   1 243.178 11.8249   5
  -7  -8   1 252.442 12.9590  10
   6   8  -1 147.778 8.26638   4
   6   8  -1 159.539 9.14549   7
   6   8  -1 159.334 10.4878  10
   6   8  -1 148.627 13.9765   2
   6   8  -1 162.291 8.22559  11
   6   8  -1 161.250 8.30200   6
   6   8  -1 141.029 17.9573   1
  -6  -8   1 161.917 7.18457   9
  -6  -8   1 147.559 8.94033   2
  -6  -8   1 166.614 9.65589  10
  -6  -8   1 160.503 19.3153   1
  -6  -8   1 157.293 8.53345   6
  -6  -8   1 139.424 11.6255   5
  -6  -8   1 148.743 7.92125  11
  -6  -8   1 146.992 8.70733   4
   5   8  -1 1646.83 66.0755   1
   5   8  -1 1705.38 46.3452   2
   5   8  -1 1686.36 45.3962   7
   5   8  -1 1728.43 46.4829  10
   5   8  -1 1674.87 43.3544   6
   5   8  -1 1694.94 43.7495   4
   5   8  -1 1697.75 42.7349  11
  -5  -8   1 1699.13 45.5767  10
  -5  -8   1 1712.36 43.8538   6
  -5  -8   1 1726.24 68.6909   1
  -5  -8   1 1716.06 45.4342   2
  -5  -8   1 1670.30 44.5819   4
  -5  -8   1 1676.75 40.4364   9
  -5  -8   1 1696.99 43.1593   5
   4   8  -1 67.4821 4.58206  11
   4   8  -1 57.3131 4.60455   6
   4   8  -1 67.9554 6.05390   2
   4   8  -1 52.0227 13.5412  12
   4   8  -1 72.6698 6.22991  10
   4   8  -1 63.7853 5.48991   7
   4   8  -1 68.9937 4.98620   4
   4   8  -1 65.3693 10.9727   1
  -4  -8   1 64.5628 5.49469   2
  -4  -8   1 67.0672 4.76156   5
  -4  -8   1 38.0924 13.0679  12
  -4  -8   1 70.5433 5.67010  10
  -4  -8   1 83.2636 12.7225   1
  -4  -8   1 74.0012 5.27211   6
  -4  -8   1 68.7987 5.47445   4
  -4  -8   1 64.5970 3.44827   9
   3   8  -1 275.630 10.4480   6
   3   8  -1 230.822 24.7966  12
   3   8  -1 268.875 9.76683  11
   3   8  -1 262.278 9.87744   5
   3   8  -1 263.362 12.0076  10
   3   8  -1 244.092 11.8820   2
   3   8  -1 279.406 20.8882   1
   3   8  -1 286.041 10.5503   4
  -3  -8   1 257.115 10.4734   6
  -3  -8   1 202.809 25.2001  12
  -3  -8   1 254.254 11.5977   2
  -3  -8   1 238.104 13.6310  13
  -3  -8   1 265.253 9.84588   5
  -3  -8   1 267.474 11.6801  10
   2   8  -1 95.3802 5.37618   4
   2   8  -1 92.5599 5.39019   5
   2   8  -1 81.5378 10.3000   1
   2   8  -1 98.7942 6.86999  10
   2   8  -1 89.5383 14.9573  12
   2   8  -1 93.5695 6.81316   2
   2   8  -1 92.9541 5.40803   6
   2   8  -1 101.235 6.24356   3
   2   8  -1 85.8697 10.7508   1
  -2  -8   1 76.2035 16.8376  12
  -2  -8   1 95.5059 6.64173  10
  -2  -8   1 99.1431 5.03340   5
  -2  -8   1 94.8052 5.64158   6
   1   8  -1 -0.5659 0.77286   4
   1   8  -1 -0.5495 0.90069   6
   1   8  -1 2.61369 1.82902  10
   1   8  -1 3.09300 1.40456   3
   1   8  -1 -1.8169 2.45436   1
   1   8  -1 10.0947 6.74386  12
   1   8  -1 0.25175 1.28063   2
   1   8  -1 -1.8291 0.95698   5
   1   8  -1 0.71781 2.45864   1
  -1  -8   1 6.02526 7.35746  12
  -1  -8   1 1.49144 1.29514   6
  -1  -8   1 0.52106 0.88900   5
  -1  -8   1 -0.3209 1.44967  10
   0   8  -1 76.3640 4.55756   4
   0   8  -1 74.6376 5.92538   5
   0   8  -1 71.8670 6.05147  10
   0   8  -1 78.5732 6.26066   2
   0   8  -1 74.9799 8.35956   1
   0   8  -1 81.0370 5.31086   3
   0   8  -1 77.3280 8.50401   1
   0   8  -1 78.7505 4.57952   6
   0  -8   1 80.4508 4.87833   6
   0  -8   1 76.1878 4.65080   5
   0  -8   1 70.6897 6.39360  10
  -1   8  -1 320.680 13.0552   5
  -1   8  -1 292.840 16.6223   1
  -1   8  -1 322.755 14.1366  10
  -1   8  -1 304.752 11.6995   3
  -1   8  -1 301.778 15.9840   1
  -1   8  -1 314.461 9.17202   9
  -1   8  -1 317.816 13.5421   2
  -1   8  -1 310.492 10.2960   6
   1  -8   1 309.878 10.5911   6
  -2   8  -1 156.369 7.84620   3
  -2   8  -1 170.788 6.65195   9
  -2   8  -1 160.212 10.3930  10
  -2   8  -1 168.475 8.96102   5
  -2   8  -1 154.742 6.27002   6
  -2   8  -1 153.317 9.10628   2
   2  -8   1 154.783 6.56186   6
  -3   8  -1 794.966 20.8637   4
  -3   8  -1 794.595 19.9892   6
  -3   8  -1 763.328 23.4998   3
  -3   8  -1 779.155 24.7294   5
  -3   8  -1 785.655 24.5081  11
  -3   8  -1 797.898 21.8998   9
   3  -8   1 796.444 20.7778   6
  -4   8  -1 370.322 15.4388   3
  -4   8  -1 380.122 13.6229   9
  -4   8  -1 387.388 19.4208  10
  -4   8  -1 382.882 16.4477   5
  -4   8  -1 396.087 15.6146  11
  -4   8  -1 389.476 12.1635   4
  -5   8  -1 89.1591 9.45667  10
  -5   8  -1 96.1085 6.67497   7
  -5   8  -1 94.3232 7.84782   3
  -5   8  -1 100.669 7.57585  11
  -5   8  -1 93.9986 6.51778   9
  -5   8  -1 103.132 5.53535   4
  -5   8  -1 104.286 8.14404   5
   5  -8   1 107.804 6.23705   3
  -6   8  -1 73.2987 7.12458   5
  -6   8  -1 74.0602 4.94545   4
  -6   8  -1 55.7910 8.31782  10
  -6   8  -1 63.6150 5.78747   9
  -6   8  -1 56.5525 6.35857  11
  -6   8  -1 61.5018 6.00101   7
  -6   8  -1 68.7780 6.48209   3
   6  -8   1 71.7125 5.32645   3
  -7   8  -1 30.8913 7.04083  10
  -7   8  -1 39.7242 4.07845   4
  -7   8  -1 38.9625 5.90131   5
  -7   8  -1 36.5284 5.43093   8
  -7   8  -1 37.1452 5.08359   9
  -7   8  -1 36.8728 4.36795   7
  -7   8  -1 28.1995 8.67230  11
  -7   8  -1 32.7013 4.93396   3
   7  -8   1 40.9676 4.36186   3
  -8   8  -1 16.8575 4.74228   5
  -8   8  -1 14.5087 3.64533   8
  -8   8  -1 10.6771 4.97290  10
  -8   8  -1 14.1788 2.94266   4
  -8   8  -1 8.89666 3.34283   9
   8  -8   1 18.0530 3.20074   3
  -9   8  -1 63.1626 5.32981   8
  -9   8  -1 47.5587 6.43126   9
  -9   8  -1 58.0460 7.78548   5
  -9   8  -1 51.5239 6.80341   4
  -9   8  -1 49.0659 5.97986   8
   9  -8   1 57.7293 5.13371   3
 -10   8  -1 41.7214 9.69565   5
 -10   8  -1 31.1615 4.14415   8
 -10   8  -1 30.6246 5.12881   8
 -10   8  -1 24.7783 5.33339   9
 -10   8  -1 32.4982 4.69179   4
  10  -8   1 29.1459 4.22736   3
 -11   8  -1 29.7454 6.69049   9
 -11   8  -1 32.4038 4.80515   4
 -11   8  -1 31.3371 7.37632   5
 -12   8  -1 143.035 9.15754   4
 -12   8  -1 128.738 13.1804   5
 -12   8  -1 132.987 11.6790   9
  17   7  -1 4.53081 4.59837   3
  17   7  -1 1.45102 4.09491  11
 -17  -7   1 -1.3327 2.85200   6
 -17  -7   1 -5.3653 2.68777   4
 -17  -7   1 7.15484 4.26102   9
  16   7  -1 18.5189 6.22285  11
  16   7  -1 15.8029 7.52983   2
 -16  -7   1 25.2231 6.58067   9
 -16  -7   1 11.3782 3.59105   6
 -16  -7   1 13.9246 5.40049   4
  15   7  -1 -0.2499 3.54673  11
  15   7  -1 -2.8543 4.23854   2
 -15  -7   1 -0.6755 3.00624   9
 -15  -7   1 -0.4191 2.24086   6
 -15  -7   1 0.21494 2.78988   4
  14   7  -1 -1.8320 2.62890  11
  14   7  -1 7.07588 2.48124   8
  14   7  -1 11.4411 5.42774   2
 -14  -7   1 4.53402 2.63343   6
 -14  -7   1 2.27335 3.37869   9
 -14  -7   1 0.72033 4.05081   4
  13   7  -1 47.3373 6.49791   7
  13   7  -1 29.7092 7.47366   2
  13   7  -1 35.9863 4.46420   8
  13   7  -1 48.8572 8.27386  11
 -13  -7   1 37.8577 6.77059   4
 -13  -7   1 40.0395 5.16653   6
 -13  -7   1 43.5848 6.65184   9
  12   7  -1 119.411 11.1578   2
  12   7  -1 122.904 10.2145  11
  12   7  -1 116.478 7.16040   8
  12   7  -1 117.124 8.87537   7
 -12  -7   1 128.807 9.79976   9
 -12  -7   1 126.930 8.59274   6
 -12  -7   1 141.019 10.7601   4
  11   7  -1 1.54103 3.17491   2
  11   7  -1 4.87346 2.20873   8
  11   7  -1 0.09061 2.23441  11
  11   7  -1 1.94094 2.52467   7
 -11  -7   1 3.05644 2.25181   4
 -11  -7   1 3.53103 2.25389   9
 -11  -7   1 5.39860 2.30661   6
 -11  -7   1 0.42186 2.55110   2
  10   7  -1 16.9879 3.24203   6
  10   7  -1 24.4616 5.24891   2
  10   7  -1 18.7259 4.24086  11
  10   7  -1 16.4901 5.75189   4
  10   7  -1 23.6954 3.65461   8
  10   7  -1 21.8173 4.24411   7
  10   7  -1 10.6882 7.95886   1
 -10  -7   1 16.4608 7.35249   2
 -10  -7   1 21.3509 4.56199   4
 -10  -7   1 16.1265 3.86352  11
 -10  -7   1 20.0160 4.35091   9
 -10  -7   1 23.9842 6.06496  10
 -10  -7   1 23.0308 4.07950   6
 -10  -7   1 24.4372 11.5840   1
   9   7  -1 58.7125 5.07205   8
   9   7  -1 60.3363 6.33582   6
   9   7  -1 63.0747 5.89225   4
   9   7  -1 65.5685 7.59314  10
   9   7  -1 44.4899 12.7273   1
   9   7  -1 60.5214 5.76573   7
   9   7  -1 67.9571 7.26634   2
   9   7  -1 61.7482 6.23574  11
  -9  -7   1 60.0642 5.96790   9
  -9  -7   1 58.9907 14.3112   1
  -9  -7   1 62.1550 6.01364   2
  -9  -7   1 59.5536 6.62092  10
  -9  -7   1 61.7275 6.52951   4
  -9  -7   1 67.8404 5.85676   6
  -9  -7   1 58.3605 5.80270  11
   8   7  -1 587.497 23.3231  10
   8   7  -1 563.001 20.2479   4
   8   7  -1 570.740 38.3611   1
   8   7  -1 592.791 18.9222   8
   8   7  -1 578.476 22.0503   2
   8   7  -1 577.563 21.0862  11
   8   7  -1 585.828 20.4038   7
   8   7  -1 574.352 19.2764   6
   8   7  -1 588.861 19.1904   9
  -8  -7   1 608.269 21.4619   4
  -8  -7   1 593.500 19.7328   6
  -8  -7   1 591.232 20.1131  11
  -8  -7   1 590.280 19.4387   9
  -8  -7   1 542.280 47.5684   1
  -8  -7   1 577.045 20.9926   2
  -8  -7   1 555.500 21.9391  10
   7   7  -1 6.72897 4.71212   1
   7   7  -1 3.48037 1.88115   7
   7   7  -1 5.39905 2.02764   8
   7   7  -1 3.80351 3.85360  10
   7   7  -1 5.93243 2.13508   4
   7   7  -1 5.80129 1.72519   9
   7   7  -1 6.52561 1.89538   6
   7   7  -1 5.78086 2.16925  11
   7   7  -1 3.15575 2.24630   2
  -7  -7   1 10.1633 3.16911  10
  -7  -7   1 4.08008 2.59152   6
  -7  -7   1 4.94849 1.79132   9
  -7  -7   1 -0.1093 4.56218   1
  -7  -7   1 5.64811 2.32972   2
  -7  -7   1 7.34010 2.48376  11
   6   7  -1 18.3903 3.90333   2
   6   7  -1 14.0641 2.79400  11
   6   7  -1 13.2690 2.84166   4
   6   7  -1 10.2944 2.29296   6
   6   7  -1 16.8293 2.27524   9
   6   7  -1 16.0602 3.75712  10
   6   7  -1 20.8995 3.70912   7
  -6  -7   1 17.0630 6.82211   1
  -6  -7   1 14.8131 3.16826   2
  -6  -7   1 14.0616 2.48553   9
  -6  -7   1 14.9882 2.76123   6
  -6  -7   1 12.4365 2.96763  10
  -6  -7   1 16.3121 3.35671   4
  -6  -7   1 20.4180 3.72368   5
  -6  -7   1 18.7758 3.19878  11
   5   7  -1 86.9847 15.5604  12
   5   7  -1 86.0972 4.41743   9
   5   7  -1 83.1521 5.31390  11
   5   7  -1 77.1690 5.37275   4
   5   7  -1 80.5327 6.44685   2
   5   7  -1 85.3174 12.5673   1
   5   7  -1 81.8497 6.03649   7
   5   7  -1 79.3214 5.27823   6
   5   7  -1 86.3303 6.76789  10
  -5  -7   1 82.2122 6.21400  10
  -5  -7   1 66.5679 8.88134  13
  -5  -7   1 84.4717 4.55602   9
  -5  -7   1 74.8380 5.62434   4
  -5  -7   1 79.7304 12.2343   1
  -5  -7   1 83.9357 6.19836  11
  -5  -7   1 75.4955 5.35920   6
  -5  -7   1 75.0875 17.4938  12
  -5  -7   1 89.1898 6.23446   2
  -5  -7   1 75.8096 5.31027   5
   4   7  -1 373.379 12.8380   6
   4   7  -1 362.781 14.4324  10
   4   7  -1 342.771 28.4999  12
   4   7  -1 371.895 12.2566  11
   4   7  -1 360.600 10.3571   9
   4   7  -1 352.031 12.7873   4
   4   7  -1 349.725 13.8119   7
   4   7  -1 354.702 14.3401   2
   4   7  -1 379.301 25.1378   1
  -4  -7   1 365.722 12.9804   6
  -4  -7   1 338.427 30.8921  12
  -4  -7   1 350.193 13.7486  10
  -4  -7   1 359.659 10.6228   9
  -4  -7   1 367.026 13.5023   4
  -4  -7   1 362.661 13.9655   2
  -4  -7   1 349.283 17.5282  13
  -4  -7   1 371.813 12.4386   5
  -4  -7   1 366.139 25.7598   1
   3   7  -1 5.08597 5.49084  12
   3   7  -1 1.94640 1.52090  10
   3   7  -1 0.22913 2.76463   1
   3   7  -1 1.61905 1.22321   4
   3   7  -1 1.81599 1.17101  11
   3   7  -1 2.54095 1.42189   2
   3   7  -1 0.35679 1.22552   6
  -3  -7   1 -1.6083 2.99118  13
  -3  -7   1 3.03817 1.44811   4
  -3  -7   1 -5.0473 4.82669  12
  -3  -7   1 1.80348 1.38895  10
  -3  -7   1 3.58124 1.33481   5
  -3  -7   1 1.94547 1.29833   2
  -3  -7   1 2.63260 1.35049   6
   2   7  -1 393.200 14.6718   2
   2   7  -1 386.424 14.3316  10
   2   7  -1 400.899 23.2272   1
   2   7  -1 388.997 12.6531   4
   2   7  -1 378.340 12.0619  11
   2   7  -1 387.763 12.3556   5
   2   7  -1 382.389 12.6574   6
   2   7  -1 416.904 30.8217  12
  -2  -7   1 387.598 11.9450   5
  -2  -7   1 393.264 12.9548   6
  -2  -7   1 363.687 31.3326  12
  -2  -7   1 394.672 14.1252  10
   1   7  -1 83.7797 12.8125  12
   1   7  -1 80.9257 5.88914   2
   1   7  -1 80.7844 8.64683   1
   1   7  -1 89.9734 6.06282  10
   1   7  -1 85.9498 5.24676   5
   1   7  -1 83.9584 5.21118   3
   1   7  -1 85.8653 9.33294   1
   1   7  -1 79.6658 4.52931   4
  -1  -7   1 65.7665 15.4850  12
  -1  -7   1 87.6844 4.42888   5
  -1  -7   1 83.5105 5.83170  10
  -1  -7   1 85.7808 4.88900   6
   0   7  -1 1276.55 34.4770   5
   0   7  -1 1293.33 41.2050   1
   0   7  -1 1311.86 32.2260   6
   0   7  -1 1317.21 35.4528   2
   0   7  -1 1297.94 35.4373  10
   0   7  -1 1294.05 58.3404  12
   0   7  -1 1362.59 43.3920   1
   0   7  -1 1292.08 32.4085   4
   0   7  -1 1333.89 35.7635   3
   0  -7   1 1302.42 63.5327  12
   0  -7   1 1282.50 35.9357  10
   0  -7   1 1279.23 32.0763   5
   0  -7   1 1294.36 32.4150   6
  -1   7  -1 118.372 7.25649   2
  -1   7  -1 114.715 9.13841   1
  -1   7  -1 113.964 7.66649  10
  -1   7  -1 126.742 9.15832   1
  -1   7  -1 113.956 15.6493  12
  -1   7  -1 107.058 5.01196   6
  -1   7  -1 117.057 4.53196   9
  -1   7  -1 116.513 6.59488   5
   1  -7   1 111.821 5.26998   6
  -2   7  -1 29.6138 2.36128   6
  -2   7  -1 40.6532 4.05804   5
  -2   7  -1 30.3143 3.25071   3
  -2   7  -1 36.0353 4.90832  10
  -2   7  -1 32.9947 2.70520   9
   2  -7   1 30.7015 2.64496   6
  -3   7  -1 26.4379 5.38764  10
  -3   7  -1 28.6187 2.93163   9
  -3   7  -1 24.8565 3.38026   3
  -3   7  -1 23.8235 2.46869   4
  -3   7  -1 24.4623 2.00189   6
  -3   7  -1 32.5050 3.92905   5
  -3   7  -1 33.7805 3.69990  11
   3  -7   1 26.1620 2.41247   6
  -4   7  -1 388.191 15.0563   5
  -4   7  -1 389.919 13.3726   9
  -4   7  -1 351.428 17.7937  10
  -4   7  -1 389.670 14.9604  11
  -4   7  -1 312.725 20.4186   3
  -4   7  -1 379.878 11.9155   4
   4  -7   1 389.275 12.8851   3
  -5   7  -1 40.1185 7.38917  10
  -5   7  -1 43.1816 4.90583  11
  -5   7  -1 40.1661 6.34448   3
  -5   7  -1 40.2297 3.53909   4
  -5   7  -1 45.4567 4.50342   7
  -5   7  -1 41.8450 5.22289   5
  -5   7  -1 39.8664 4.33108   9
   5  -7   1 45.8715 3.94443   3
  -6   7  -1 16.4245 3.51094   7
  -6   7  -1 20.3874 3.56821  11
  -6   7  -1 15.1533 3.95604   5
  -6   7  -1 18.1578 3.98238   3
  -6   7  -1 20.3970 3.08906   4
  -6   7  -1 14.5605 5.11084   9
   6  -7   1 22.9821 3.19046   3
  -7   7  -1 15.5156 3.87799  11
  -7   7  -1 10.7736 2.51716   4
  -7   7  -1 9.91047 3.35409   5
  -7   7  -1 9.14635 2.95984   8
  -7   7  -1 12.0507 2.49017   7
  -7   7  -1 15.9575 3.95752   9
   7  -7   1 8.19967 2.27942   3
  -8   7  -1 483.676 16.9486   8
  -8   7  -1 494.071 16.8912   4
  -8   7  -1 490.632 19.7598   9
  -8   7  -1 499.397 21.3234   5
   8  -7   1 507.487 16.1901   3
  -9   7  -1 160.612 11.9326   5
  -9   7  -1 154.761 7.65587   8
  -9   7  -1 133.219 10.2457   9
  -9   7  -1 151.834 8.64968   4
  -9   7  -1 154.677 8.40426   8
  -9   7  -1 117.626 19.4290   2
   9  -7   1 149.911 7.69369   3
 -10   7  -1 8.23165 3.44533   9
 -10   7  -1 17.7108 3.63121   4
 -10   7  -1 14.2682 4.55666   5
 -10   7  -1 3.67750 3.57688   8
 -10   7  -1 10.2154 2.40183   8
  10  -7   1 17.1529 3.27891   3
 -11   7  -1 -1.4505 2.27498   9
 -11   7  -1 -0.0080 2.98150   5
 -11   7  -1 4.34340 2.53699   4
  11  -7   1 -0.9716 2.12559   3
 -12   7  -1 32.2942 6.87747   5
 -12   7  -1 24.4937 4.69639   4
 -12   7  -1 28.2344 6.23650   9
 -13   7  -1 75.0525 10.2894   5
 -13   7  -1 40.7441 8.16337   9
 -13   7  -1 52.4481 7.18626   4
  17   6  -1 286.023 18.5563   3
  17   6  -1 312.839 21.0553  11
 -17  -6   1 328.620 19.8385   4
 -17  -6   1 323.201 15.3250   6
 -17  -6   1 327.887 19.8686   9
  16   6  -1 6.27129 5.05389   3
  16   6  -1 -4.8919 3.70217  11
 -16  -6   1 3.50183 2.99895   6
 -16  -6   1 -0.0920 3.38171   4
 -16  -6   1 1.51560 3.78564   9
  15   6  -1 1.47668 3.70834  11
 -15  -6   1 9.17333 4.27224   4
 -15  -6   1 11.6437 3.06741   6
 -15  -6   1 6.00930 4.03245   9
  14   6  -1 -7.5655 3.24504   7
  14   6  -1 3.02882 3.63292  11
 -14  -6   1 -0.7304 2.42894   4
 -14  -6   1 7.30530 3.87513   9
 -14  -6   1 0.23165 2.24262   6
  13   6  -1 1.21421 3.12063  11
  13   6  -1 2.53102 2.05767   8
  13   6  -1 4.05176 4.06612   2
  13   6  -1 -2.5031 2.77108   7
 -13  -6   1 2.99224 2.12827   6
 -13  -6   1 5.22948 3.26836   4
 -13  -6   1 2.80829 2.93114   9
  12   6  -1 2.78977 1.94167   8
  12   6  -1 2.05567 2.87016  11
  12   6  -1 8.74138 3.67328   7
  12   6  -1 -2.8429 2.43305   2
 -12  -6   1 4.33259 2.82633   2
 -12  -6   1 1.04726 2.63576   4
 -12  -6   1 2.73475 2.02483   6
 -12  -6   1 3.07760 2.67246   9
  11   6  -1 252.077 12.1523   7
  11   6  -1 240.709 15.3256   2
  11   6  -1 267.118 14.5907  11
  11   6  -1 269.942 10.4862   8
 -11  -6   1 256.235 14.0605   4
 -11  -6   1 223.219 12.7473   2
 -11  -6   1 267.600 13.7041   9
 -11  -6   1 261.453 12.0954   6
  10   6  -1 -1.7399 1.67807   7
  10   6  -1 0.09023 1.99386   2
  10   6  -1 15.1650 7.44359   1
  10   6  -1 3.16327 2.26218  11
  10   6  -1 1.33836 2.05993   4
  10   6  -1 1.39217 1.49289   6
  10   6  -1 0.26393 1.46304   8
 -10  -6   1 0.44798 1.86606   2
 -10  -6   1 2.71688 1.79649  11
 -10  -6   1 0.86084 1.73450   9
 -10  -6   1 4.61033 8.37247   1
 -10  -6   1 0.17007 1.57544   4
 -10  -6   1 -1.7319 2.41241  10
 -10  -6   1 1.27059 1.69838   6
   9   6  -1 1192.24 34.6326   9
   9   6  -1 1231.07 33.8155   6
   9   6  -1 1243.36 32.2955   8
   9   6  -1 1192.78 34.3661   7
   9   6  -1 1175.45 35.3654   4
   9   6  -1 1211.25 60.0851   1
   9   6  -1 1246.88 36.2853  11
   9   6  -1 1196.46 37.6581   2
  -9  -6   1 1237.47 35.0367   9
  -9  -6   1 1234.14 33.8606   6
  -9  -6   1 1156.73 35.4504   2
  -9  -6   1 1218.56 61.8803   1
  -9  -6   1 1176.06 35.2099  11
  -9  -6   1 1251.22 39.2591  10
  -9  -6   1 1195.69 36.0826   4
   8   6  -1 117.493 7.12303   9
   8   6  -1 125.650 9.66937  10
   8   6  -1 130.296 7.78786   7
   8   6  -1 120.841 7.92321   4
   8   6  -1 119.041 16.9207   1
   8   6  -1 128.900 6.90890   8
   8   6  -1 117.128 8.76512   2
   8   6  -1 133.279 7.36260   6
   8   6  -1 126.536 8.29725  11
  -8  -6   1 123.610 8.36965   4
  -8  -6   1 109.266 7.37997  11
  -8  -6   1 108.509 17.2865   1
  -8  -6   1 116.169 8.87521  10
  -8  -6   1 115.335 7.92874   2
  -8  -6   1 126.698 7.72147   9
   7   6  -1 1431.98 60.8571   1
   7   6  -1 1387.75 37.4567  11
   7   6  -1 1386.03 35.7925   8
   7   6  -1 1404.67 39.5155   2
   7   6  -1 1372.96 36.2094   9
   7   6  -1 1376.10 37.4162   7
   7   6  -1 1384.35 40.6389  10
   7   6  -1 1326.75 36.0629   6
   7   6  -1 1359.41 37.5804   4
  -7  -6   1 1383.92 36.4605   6
  -7  -6   1 1360.18 39.5127  10
  -7  -6   1 1390.78 38.4087   4
  -7  -6   1 1390.44 36.5192   9
  -7  -6   1 1353.10 36.9571  11
  -7  -6   1 1358.56 38.1401   2
  -7  -6   1 1478.04 63.4798   1
   6   6  -1 3.96684 2.12160  10
   6   6  -1 2.28480 1.45025  11
   6   6  -1 2.49858 1.34439   6
   6   6  -1 1.40959 2.94685   1
   6   6  -1 3.91492 1.58128   9
   6   6  -1 2.67709 1.42022   4
   6   6  -1 1.66953 1.72925   2
   6   6  -1 1.89044 1.29807   7
   6   6  -1 7.14709 6.40693  12
  -6  -6   1 5.16980 4.91800  13
  -6  -6   1 4.23278 4.46710   1
  -6  -6   1 1.11353 1.23158  11
  -6  -6   1 3.26864 1.66250  10
  -6  -6   1 1.68669 1.60800   4
  -6  -6   1 2.49586 1.93592   2
  -6  -6   1 5.25759 1.64556   9
  -6  -6   1 3.47243 1.50399   6
   5   6  -1 5.02062 5.76288  12
   5   6  -1 0.38356 1.17548  10
   5   6  -1 2.50422 1.28885  11
   5   6  -1 0.83544 1.37224   4
   5   6  -1 0.66188 1.27740   7
   5   6  -1 0.21808 0.93196   6
   5   6  -1 1.81298 0.99156   9
   5   6  -1 2.43008 1.48130   2
   5   6  -1 -1.6128 2.91839   1
  -5  -6   1 2.27506 1.30171   2
  -5  -6   1 1.93195 5.09480  12
  -5  -6   1 1.52781 1.24035   5
  -5  -6   1 1.58235 3.24560  13
  -5  -6   1 -1.5915 3.14952   1
  -5  -6   1 0.15223 0.68241   9
  -5  -6   1 0.70249 1.06022  10
  -5  -6   1 0.42385 0.95382   6
  -5  -6   1 -0.3342 1.08210  11
  -5  -6   1 2.10798 1.54034   4
   4   6  -1 20.3727 3.54108  10
   4   6  -1 14.1798 5.61411   1
   4   6  -1 21.8012 2.06724   9
   4   6  -1 21.3609 2.59975   6
   4   6  -1 20.1776 3.17775   2
   4   6  -1 20.7003 2.69621   4
   4   6  -1 23.6137 3.19145   7
   4   6  -1 18.7422 6.90412  12
   4   6  -1 20.9663 2.50601  11
  -4  -6   1 20.7850 2.73607   6
  -4  -6   1 23.3858 4.95593  13
  -4  -6   1 20.2381 2.58610   5
  -4  -6   1 23.3344 8.55124  12
  -4  -6   1 19.3134 2.04791   9
  -4  -6   1 26.4984 7.58069   1
  -4  -6   1 20.8117 2.86862   4
  -4  -6   1 18.0447 2.39012  11
  -4  -6   1 20.7711 3.00705  10
  -4  -6   1 19.8234 3.04572   2
   3   6  -1 707.543 17.1347   9
   3   6  -1 711.180 19.7592   6
   3   6  -1 729.225 33.7421   1
   3   6  -1 703.899 21.3162  10
   3   6  -1 689.305 19.8325   4
   3   6  -1 683.864 38.6546  12
   3   6  -1 686.495 18.8883  11
  -3  -6   1 696.934 20.3506   4
  -3  -6   1 702.405 17.4413   9
  -3  -6   1 682.688 20.9277   2
  -3  -6   1 717.608 23.2243  10
  -3  -6   1 706.365 19.9108   6
  -3  -6   1 705.144 23.9957  13
  -3  -6   1 687.042 19.1017   5
  -3  -6   1 694.880 41.7064  12
   2   6  -1 98.7630 5.07220   4
   2   6  -1 92.7251 13.2651  12
   2   6  -1 94.1622 4.55129  11
   2   6  -1 93.9133 5.84091  10
   2   6  -1 81.2207 9.69178   1
   2   6  -1 91.1036 4.87506   6
   2   6  -1 94.1460 6.00220   2
   2   6  -1 97.1690 4.64889   5
  -2  -6   1 94.6004 4.61638   5
  -2  -6   1 90.2271 5.63979   2
  -2  -6   1 89.2373 5.50618  10
  -2  -6   1 89.2523 10.4369   1
  -2  -6   1 92.5119 6.69036  13
  -2  -6   1 77.8749 13.6113  12
  -2  -6   1 98.7323 5.15007   6
   1   6  -1 349.546 11.3558   5
   1   6  -1 333.381 11.4261   3
   1   6  -1 336.994 12.5815   2
   1   6  -1 341.893 10.9355   4
   1   6  -1 337.200 12.3141  10
   1   6  -1 331.459 17.4635   1
   1   6  -1 329.999 24.8492  12
   1   6  -1 343.772 10.9036   6
   1   6  -1 358.309 19.0095   1
  -1  -6   1 342.930 10.9982   6
  -1  -6   1 336.690 10.1495   5
  -1  -6   1 337.540 12.3561  10
  -1  -6   1 345.651 27.9554  12
   0   6  -1 490.387 13.8746   6
   0   6  -1 498.700 16.2874  10
   0   6  -1 480.346 16.0066   2
   0   6  -1 479.704 14.1514   4
   0   6  -1 525.201 31.4116  12
   0   6  -1 492.372 14.7223   3
   0   6  -1 500.352 21.4586   1
   0   6  -1 483.295 20.1873   1
   0   6  -1 467.420 15.0293   5
   0  -6   1 502.217 14.0994   6
   0  -6   1 484.208 16.4443  10
   0  -6   1 478.762 13.6708   5
   0  -6   1 447.409 32.1880  12
  -1   6  -1 1411.46 33.9566   6
  -1   6  -1 1424.45 41.1261   1
  -1   6  -1 1419.91 33.2663   9
  -1   6  -1 1450.57 35.9934   5
  -1   6  -1 1435.16 58.0409  12
  -1   6  -1 1404.44 35.2795   3
  -1   6  -1 1458.12 38.4419  10
  -1   6  -1 1435.13 41.2030   1
  -1   6  -1 1403.19 37.1868   2
   1  -6   1 1446.20 34.2020   6
  -2   6  -1 12.6750 1.57119   6
  -2   6  -1 11.8305 3.14415  10
  -2   6  -1 9.71531 6.53437  13
  -2   6  -1 11.1257 1.72556   9
  -2   6  -1 13.0088 2.28954   3
  -2   6  -1 15.3186 2.78220   5
  -2   6  -1 21.8199 6.76041  12
   2  -6   1 11.6894 1.66067   6
  -3   6  -1 159.358 6.32791   4
  -3   6  -1 155.520 7.37424   3
  -3   6  -1 178.210 17.2281  12
  -3   6  -1 168.155 8.23953   5
  -3   6  -1 153.188 5.29385   6
  -3   6  -1 159.660 10.2321  10
  -3   6  -1 163.789 7.04428   9
  -3   6  -1 168.119 8.09561  11
  -3   6  -1 134.749 15.6509  13
   3  -6   1 162.739 5.95166   6
   3  -6   1 163.364 6.91529   3
  -4   6  -1 34.6824 3.60967   9
  -4   6  -1 31.8534 2.88727   4
  -4   6  -1 34.4605 4.11175   5
  -4   6  -1 35.0576 3.91336  11
  -4   6  -1 36.8370 4.25430   3
   4  -6   1 31.3218 3.14446   3
  -5   6  -1 125.177 7.69535  11
  -5   6  -1 133.324 7.48453   9
  -5   6  -1 124.680 8.03398   5
  -5   6  -1 114.170 7.48201   3
  -5   6  -1 123.184 6.06844   4
  -5   6  -1 123.719 6.93019   7
   5  -6   1 122.977 6.10003   3
  -6   6  -1 139.759 9.03413   5
  -6   6  -1 131.722 7.95089   9
  -6   6  -1 138.222 6.91763   4
  -6   6  -1 135.407 8.52460  11
  -6   6  -1 134.674 7.29059   3
  -6   6  -1 127.387 7.26743   7
   6  -6   1 140.902 6.69525   3
  -7   6  -1 31.7023 4.63311   9
  -7   6  -1 40.6950 4.14853   8
  -7   6  -1 35.1508 5.04219  11
  -7   6  -1 35.5716 3.80931   4
  -7   6  -1 32.8691 3.27947   7
  -7   6  -1 37.9028 5.31384   5
   7  -6   1 33.2990 3.51838   3
  -8   6  -1 229.041 13.2554  11
  -8   6  -1 231.020 13.3280   5
  -8   6  -1 244.721 12.6770   9
  -8   6  -1 239.388 10.5718   4
   8  -6   1 232.060 9.62457   3
  -9   6  -1 749.715 21.2030   8
  -9   6  -1 819.265 29.2089   5
  -9   6  -1 781.648 27.4683   9
  -9   6  -1 768.352 34.6000   2
  -9   6  -1 756.811 22.4332   8
  -9   6  -1 763.836 24.1302   4
   9  -6   1 798.221 22.5820   3
 -10   6  -1 66.7056 8.01762   5
 -10   6  -1 56.2895 5.78252   4
 -10   6  -1 64.3256 7.47104   9
 -10   6  -1 43.5402 11.5673   2
  10  -6   1 59.9708 5.17394   3
 -11   6  -1 25.2399 5.58904   9
 -11   6  -1 15.4476 3.98976   4
  11  -6   1 20.9123 3.37779   3
 -12   6  -1 14.4715 4.87268   9
 -12   6  -1 12.4278 3.80118   4
 -12   6  -1 10.8504 5.19994   5
  12  -6   1 17.8641 3.23286   3
 -13   6  -1 10.1730 3.56989   4
 -13   6  -1 13.9386 5.92415   5
 -13   6  -1 3.74246 3.54492   9
  17   5  -1 5.60377 5.48608   3
 -17  -5   1 0.60719 4.28967   4
 -17  -5   1 5.05301 3.21789   6
 -17  -5   1 6.46784 4.48449   9
  16   5  -1 193.892 16.4107  11
  16   5  -1 216.570 16.2846   3
 -16  -5   1 218.020 15.6077   9
 -16  -5   1 202.715 14.8643   4
 -16  -5   1 198.843 11.1270   6
  15   5  -1 14.4527 4.98302   3
  15   5  -1 11.3104 4.84570  11
  15   5  -1 14.1838 4.65662   7
 -15  -5   1 13.2426 4.82362   9
 -15  -5   1 9.52901 3.07556   6
  14   5  -1 46.8557 10.0509   2
 -14  -5   1 63.5437 8.31617   9
 -14  -5   1 53.0623 5.94305   6
 -14  -5   1 62.1397 7.93292   4
  13   5  -1 21.8332 5.42039  11
  13   5  -1 7.37331 4.50329   2
  13   5  -1 14.5961 3.49042   7
 -13  -5   1 19.8623 4.95783   4
 -13  -5   1 9.47807 3.87441   9
 -13  -5   1 12.2224 3.20685   6
  12   5  -1 265.343 17.2104   2
  12   5  -1 236.846 14.6333  11
  12   5  -1 249.940 11.9544   7
 -12  -5   1 250.543 14.0135   9
 -12  -5   1 256.177 14.2861   4
 -12  -5   1 270.801 12.0198   6
 -12  -5   1 207.556 12.9454   2
  11   5  -1 18.8918 4.81570  11
  11   5  -1 16.5764 3.63883   7
  11   5  -1 17.2610 5.88720   2
  11   5  -1 17.7141 3.16268   8
 -11  -5   1 20.1259 3.78921   6
 -11  -5   1 22.4603 7.06097   2
 -11  -5   1 21.2442 4.74527   4
 -11  -5   1 12.9657 4.00286   9
  10   5  -1 15.3552 4.11188  11
  10   5  -1 12.2906 4.46824   2
  10   5  -1 21.3759 8.18263   1
  10   5  -1 9.62408 3.21995   4
  10   5  -1 12.5574 2.62052   8
  10   5  -1 16.8651 3.20852   7
 -10  -5   1 12.6961 3.71917   4
 -10  -5   1 19.1309 4.05982   2
 -10  -5   1 10.1974 4.88631  10
 -10  -5   1 11.2416 2.93973   6
 -10  -5   1 11.9043 3.37261   9
 -10  -5   1 16.0242 3.88290  11
 -10  -5   1 12.7507 8.26591   1
   9   5  -1 3.19564 6.33286   1
   9   5  -1 3.99102 2.85384   4
   9   5  -1 5.64015 2.66883  11
   9   5  -1 5.61360 2.09837   9
   9   5  -1 2.95264 1.62659   6
   9   5  -1 9.00114 4.40776   2
   9   5  -1 4.10716 1.86066   8
   9   5  -1 5.96433 2.16263   7
  -9  -5   1 3.85808 2.07901   9
  -9  -5   1 2.56587 1.88528   2
  -9  -5   1 6.28949 2.80478   4
  -9  -5   1 6.04086 2.38706  11
  -9  -5   1 6.23159 2.53467   6
  -9  -5   1 15.9485 7.30920   1
   8   5  -1 323.696 15.1880   2
   8   5  -1 346.769 14.5784  11
   8   5  -1 341.467 13.2121   7
   8   5  -1 330.491 12.5300   6
   8   5  -1 329.426 13.4333   9
   8   5  -1 335.687 11.7108   8
   8   5  -1 323.891 13.7290   4
   8   5  -1 325.069 27.5349   1
  -8  -5   1 332.116 14.2623   4
  -8  -5   1 336.518 12.6929   6
  -8  -5   1 330.836 13.7642  11
  -8  -5   1 347.003 13.8136   9
  -8  -5   1 348.937 28.9892   1
  -8  -5   1 351.661 14.4582   2
  -8  -5   1 311.045 15.1048  10
   7   5  -1 41.1883 3.75484   6
   7   5  -1 25.9708 8.67356  12
   7   5  -1 49.4032 4.57178   4
   7   5  -1 46.8697 11.8208   1
   7   5  -1 47.8840 5.62660  10
   7   5  -1 42.7920 3.65622   8
   7   5  -1 47.1766 4.31556   7
   7   5  -1 42.6271 4.62008  11
   7   5  -1 45.9410 4.17808   9
   7   5  -1 40.5649 4.84455   2
  -7  -5   1 40.4999 10.5361   1
  -7  -5   1 39.7510 4.42376   4
  -7  -5   1 49.3928 4.24697   6
  -7  -5   1 40.9398 5.01503  10
  -7  -5   1 41.3471 3.98334   9
  -7  -5   1 43.4018 4.59128   2
  -7  -5   1 29.2386 8.58733  13
  -7  -5   1 45.9905 10.9205  12
  -7  -5   1 40.2248 4.11232  11
   6   5  -1 8.87032 2.03234   6
   6   5  -1 10.7220 2.38600   7
   6   5  -1 14.4862 2.91966   4
   6   5  -1 13.1219 3.39701  10
   6   5  -1 12.4280 2.34963   8
   6   5  -1 12.0025 2.38292   9
   6   5  -1 12.2304 5.80549  12
   6   5  -1 15.2263 6.98920   1
   6   5  -1 9.90591 2.43853  11
   6   5  -1 7.99284 2.41875   2
  -6  -5   1 12.9997 2.94651  10
  -6  -5   1 10.3106 2.50149   4
  -6  -5   1 11.1009 2.31538   9
  -6  -5   1 8.88852 2.73367   2
  -6  -5   1 12.5481 2.50529   6
  -6  -5   1 8.85645 2.23180  11
  -6  -5   1 10.8269 5.22675  13
  -6  -5   1 11.1906 6.40624  12
   5   5  -1 1.90130 0.97985   6
   5   5  -1 0.51126 1.09181   7
   5   5  -1 0.81238 1.06808   2
   5   5  -1 1.05787 1.00262   4
   5   5  -1 0.61124 1.12282  10
   5   5  -1 0.79169 1.04685  11
   5   5  -1 1.41296 0.94833   9
   5   5  -1 7.45346 4.61915  12
  -5  -5   1 1.64512 2.59878   1
  -5  -5   1 0.88096 3.51218  13
  -5  -5   1 8.65521 5.21515  12
  -5  -5   1 0.09452 1.05605   4
  -5  -5   1 -0.0658 1.15360  10
  -5  -5   1 -0.5400 0.76504   2
  -5  -5   1 1.63193 0.97303  11
  -5  -5   1 0.45415 0.90370   9
  -5  -5   1 0.33174 0.90866   6
   4   5  -1 825.427 22.5648   6
   4   5  -1 814.384 21.1022   9
   4   5  -1 829.445 37.5777   1
   4   5  -1 842.798 24.1670   2
   4   5  -1 827.575 22.9755   4
   4   5  -1 810.652 24.3032  10
   4   5  -1 808.496 40.1634  12
   4   5  -1 821.724 22.0816  11
  -4  -5   1 847.191 43.2746  12
  -4  -5   1 825.310 23.1841   4
  -4  -5   1 795.496 22.2949   6
  -4  -5   1 844.781 21.3853   9
  -4  -5   1 810.803 24.0403  10
  -4  -5   1 846.108 38.6908   1
  -4  -5   1 828.819 22.0074  11
  -4  -5   1 828.119 22.6474   5
  -4  -5   1 799.248 30.4367  13
   3   5  -1 52.7731 3.33353  11
   3   5  -1 58.4112 9.13393  12
   3   5  -1 52.2686 2.76311   9
   3   5  -1 61.0058 8.49357   1
   3   5  -1 53.7715 3.59100   6
   3   5  -1 49.2436 4.16145   2
   3   5  -1 52.9896 4.29568  10
   3   5  -1 52.8449 3.75160   4
  -3  -5   1 50.7802 4.03297   2
  -3  -5   1 54.7021 3.47809   5
  -3  -5   1 41.2756 8.88820   1
  -3  -5   1 53.7931 5.70924  13
  -3  -5   1 56.9114 2.94899   9
  -3  -5   1 53.9683 3.92598   4
  -3  -5   1 52.1550 3.30897  11
  -3  -5   1 48.4504 3.92554  10
  -3  -5   1 48.0299 9.97570  12
  -3  -5   1 53.1668 3.65832   6
   2   5  -1 23.6502 5.69329   1
   2   5  -1 28.3539 2.61705   4
   2   5  -1 31.0829 1.63490   9
   2   5  -1 29.6828 3.07241  10
   2   5  -1 28.9125 2.36064   5
   2   5  -1 28.0371 2.48715   6
   2   5  -1 29.5109 7.71347  12
   2   5  -1 29.7522 2.28949  11
   2   5  -1 31.3736 3.21868   2
  -2  -5   1 28.8006 2.76761   4
  -2  -5   1 30.8962 2.69112   6
  -2  -5   1 31.4683 2.97800  10
  -2  -5   1 33.2968 8.08185  12
  -2  -5   1 30.9895 3.04257   2
  -2  -5   1 33.9212 2.49830   5
  -2  -5   1 30.2666 1.86857   9
  -2  -5   1 26.1783 3.58406  13
   1   5  -1 0.93531 0.89319  10
   1   5  -1 1.16477 0.86063   4
   1   5  -1 -0.2253 0.59129   6
   1   5  -1 1.61313 2.07921   1
   1   5  -1 -0.9004 3.58795  12
   1   5  -1 0.79205 0.81911   5
   1   5  -1 0.70939 0.93336   2
  -1  -5   1 0.12205 0.63007   6
  -1  -5   1 -1.8541 3.79080  12
  -1  -5   1 1.02821 0.84168   2
  -1  -5   1 0.49484 0.84082  10
  -1  -5   1 -1.1400 1.40768   1
  -1  -5   1 0.83595 0.61747   5
   0   5  -1 11.1743 3.32079   1
   0   5  -1 10.9360 1.89487   3
   0   5  -1 11.3455 1.80288   5
   0   5  -1 14.1812 2.62523  10
   0   5  -1 9.00285 2.57485   1
   0   5  -1 11.2728 1.53359   6
   0   5  -1 6.16993 3.88107  12
   0   5  -1 8.47460 1.99916   2
   0  -5   1 8.84705 1.47626   6
   0  -5   1 11.8907 2.38522  10
   0  -5   1 3.44622 5.93635  12
   0  -5   1 9.03328 1.37608   5
  -1   5  -1 38.8802 4.26104   1
  -1   5  -1 39.7464 6.47051  13
  -1   5  -1 36.4673 8.24458  12
  -1   5  -1 33.7045 2.77921   3
  -1   5  -1 38.0740 3.04907   5
  -1   5  -1 40.8723 3.99466  10
  -1   5  -1 39.2676 2.44096   6
  -1   5  -1 38.6632 2.33178   9
  -1   5  -1 37.0007 4.06941   1
   1  -5   1 39.9355 2.57106   6
  -2   5  -1 189.280 6.09261   6
  -2   5  -1 201.745 8.07916   5
  -2   5  -1 183.758 16.3996  12
  -2   5  -1 192.172 7.02360   9
  -2   5  -1 192.436 7.30027   3
  -2   5  -1 190.350 17.9358  13
  -2   5  -1 191.847 9.87747  10
   2  -5   1 200.714 7.21445   3
   2  -5   1 198.984 6.41332   6
  -3   5  -1 149.248 7.17274  11
  -3   5  -1 137.258 6.55544   3
  -3   5  -1 147.939 14.1958  12
  -3   5  -1 138.273 5.67530   4
  -3   5  -1 128.347 14.1048  13
  -3   5  -1 138.895 6.34928   9
  -3   5  -1 148.274 7.20563   5
  -3   5  -1 138.198 4.54700   6
   3  -5   1 141.575 5.87313   3
  -4   5  -1 4.47239 1.63420   9
  -4   5  -1 6.71827 2.00055  11
  -4   5  -1 6.97016 5.32008  12
  -4   5  -1 6.60550 1.57869   4
  -4   5  -1 10.2814 2.41837   3
  -4   5  -1 4.97717 2.08750   5
  -4   5  -1 10.3753 2.17085   7
  -4   5  -1 0.56045 4.90134  13
   4  -5   1 5.18041 1.46810   3
  -5   5  -1 121.391 5.93351   4
  -5   5  -1 124.925 7.14140   9
  -5   5  -1 118.594 6.70845   3
  -5   5  -1 126.441 7.76325   5
  -5   5  -1 110.719 6.58080   7
  -5   5  -1 112.290 7.13226  11
   5  -5   1 129.853 5.83093   3
  -6   5  -1 166.113 7.61255   4
  -6   5  -1 170.350 9.07481   9
  -6   5  -1 175.979 9.96864   5
  -6   5  -1 158.692 7.52152   3
  -6   5  -1 155.443 7.28461   7
  -6   5  -1 157.234 9.01888  11
   6  -5   1 165.115 7.12147   3
  -7   5  -1 11.5070 3.81303   1
  -7   5  -1 10.7471 3.34259   5
  -7   5  -1 12.1302 2.41489   8
  -7   5  -1 10.4827 2.12304   7
  -7   5  -1 7.26366 2.58414   9
  -7   5  -1 5.99245 2.70370  11
  -7   5  -1 8.11171 2.23011   4
   7  -5   1 11.6323 2.36808   3
   7  -5   1 6.93589 6.91235   1
  -8   5  -1 32.3474 3.44209   8
  -8   5  -1 26.9263 7.04535   2
  -8   5  -1 32.8198 6.27726   1
  -8   5  -1 28.6274 3.73499   4
  -8   5  -1 32.4767 4.81198  11
  -8   5  -1 39.4747 5.58677   5
  -8   5  -1 22.9652 4.59109   9
   8  -5   1 29.1762 8.72768   1
   8  -5   1 22.8069 3.43746   3
  -9   5  -1 -0.9717 1.75093   9
  -9   5  -1 -0.5310 4.44284   2
  -9   5  -1 -1.5371 1.61071   4
  -9   5  -1 -0.3875 1.96165   5
   9  -5   1 2.79687 1.94546   3
 -10   5  -1 529.364 19.4469   4
 -10   5  -1 527.543 26.1904   2
 -10   5  -1 562.562 22.6423   9
 -10   5  -1 540.666 23.2259   5
  10  -5   1 550.436 17.4263   3
 -11   5  -1 2.37824 2.30907   4
 -11   5  -1 5.90476 6.26297   2
 -11   5  -1 3.99624 3.16173   5
 -11   5  -1 4.87693 2.70963   9
  11  -5   1 3.85277 2.47067   3
 -12   5  -1 2.71457 3.35159   5
 -12   5  -1 4.59406 2.95435   4
 -12   5  -1 6.97366 5.59714   9
  12  -5   1 -0.5972 2.15703   3
 -13   5  -1 28.0020 6.96993   5
 -13   5  -1 23.0827 6.07772   9
 -13   5  -1 24.8701 5.04621   4
  13  -5   1 34.4391 4.71766   3
 -14   5  -1 110.492 11.3408   9
 -14   5  -1 96.6483 9.11438   4
 -14   5  -1 92.5151 11.8762   5
  17   4  -1 9.33690 6.44281   3
 -17  -4   1 6.36025 3.86679   4
 -17  -4   1 5.12506 3.16385   6
 -17  -4   1 10.3834 4.23782   5
 -17  -4   1 4.48603 4.62890   9
  16   4  -1 15.2772 5.73066   3
 -16  -4   1 13.8809 5.23144   9
 -16  -4   1 9.97230 3.99534   4
 -16  -4   1 8.72901 3.06750   6
  15   4  -1 32.6623 7.17742   3
  15   4  -1 25.9078 7.18569  11
 -15  -4   1 24.5428 6.08956   4
 -15  -4   1 30.5419 4.93164   6
 -15  -4   1 40.6702 7.97303   9
  14   4  -1 -0.1333 2.55857   3
  14   4  -1 1.60314 3.09569   7
  14   4  -1 4.60126 4.01221  11
 -14  -4   1 3.26651 2.08910   6
 -14  -4   1 3.40313 5.63016   9
 -14  -4   1 7.86001 3.28509   4
  13   4  -1 4.01978 3.03597   7
  13   4  -1 8.09948 4.09310  11
  13   4  -1 3.24974 3.81666   2
 -13  -4   1 8.93374 3.79678   9
 -13  -4   1 3.74492 2.43623   6
 -13  -4   1 2.82977 2.63131   4
  12   4  -1 2.98054 3.02976  11
  12   4  -1 0.29111 1.89985   7
  12   4  -1 12.6838 4.58848   2
 -12  -4   1 3.41505 3.05085   4
 -12  -4   1 -0.2995 1.83515   6
 -12  -4   1 2.68954 2.78727   9
 -12  -4   1 3.52341 2.72546   2
  11   4  -1 1552.32 47.2897  11
  11   4  -1 1589.06 51.5877   2
  11   4  -1 1643.21 42.6660   7
 -11  -4   1 1653.61 46.6747   4
 -11  -4   1 1692.22 42.4016   6
 -11  -4   1 1586.19 46.4653   9
 -11  -4   1 1529.06 46.5744   2
  10   4  -1 -1.1316 2.50406   2
  10   4  -1 1.04261 1.93556   4
  10   4  -1 -0.6352 1.37049   8
  10   4  -1 -0.7922 1.66628  11
  10   4  -1 6.09096 5.93207   1
  10   4  -1 4.04071 1.86758   7
  10   4  -1 1.29044 1.73812   9
 -10  -4   1 0.33507 7.06890   1
 -10  -4   1 2.38574 2.34429  10
 -10  -4   1 0.19609 1.77623   9
 -10  -4   1 -1.5136 1.38398  11
 -10  -4   1 0.33838 1.82021   4
 -10  -4   1 -2.3173 1.75240   2
   9   4  -1 9.16312 2.67712   9
   9   4  -1 5.52795 3.05103   2
   9   4  -1 9.00456 2.17972   8
   9   4  -1 6.06993 1.76596   6
   9   4  -1 5.32673 2.13088   7
   9   4  -1 10.6726 6.37722   1
   9   4  -1 6.72144 2.70435  11
   9   4  -1 3.83198 2.01625   4
  -9  -4   1 4.01224 1.88281  11
  -9  -4   1 12.4202 3.51982  10
  -9  -4   1 10.1013 2.43988   6
  -9  -4   1 12.4241 2.84723   2
  -9  -4   1 12.0506 3.12165   9
  -9  -4   1 13.2298 6.35171   1
  -9  -4   1 3.93393 2.40673   4
   8   4  -1 9.94865 2.66562   4
   8   4  -1 7.15597 2.12706   7
   8   4  -1 4.87081 1.90743   9
   8   4  -1 5.49423 2.39133  11
   8   4  -1 7.22567 2.94755   2
   8   4  -1 6.22102 1.63632   8
   8   4  -1 3.61341 1.63065   6
   8   4  -1 1.37884 4.05662   1
  -8  -4   1 6.75018 2.04702   6
  -8  -4   1 6.17882 2.23264  11
  -8  -4   1 1.17320 5.03587   1
  -8  -4   1 4.52627 2.20724   9
  -8  -4   1 11.2764 3.33151  10
  -8  -4   1 7.32968 2.25398   2
  -8  -4   1 3.48844 2.21466   4
   7   4  -1 9.11913 2.24113   9
   7   4  -1 10.6416 5.37422   1
   7   4  -1 6.65658 1.82661   7
   7   4  -1 6.65885 2.37077   2
   7   4  -1 12.8609 2.29489   8
   7   4  -1 6.27797 2.15146  11
   7   4  -1 8.28276 1.97104   6
   7   4  -1 4.24118 5.34753  12
   7   4  -1 6.41969 1.99459   4
  -7  -4   1 6.90717 4.64533   1
  -7  -4   1 10.4728 2.62354  11
  -7  -4   1 7.40034 2.33314   9
  -7  -4   1 7.74303 2.00639   6
  -7  -4   1 6.98415 2.34932   4
  -7  -4   1 10.8947 6.24411  13
  -7  -4   1 7.92796 5.88204  12
  -7  -4   1 7.67674 2.53856   2
  -7  -4   1 5.53422 2.12816  10
   6   4  -1 1.22766 1.35298   2
   6   4  -1 1.78294 1.28501  11
   6   4  -1 -1.4045 0.71987   9
   6   4  -1 0.22149 1.05543   4
   6   4  -1 -1.6826 0.73935   6
   6   4  -1 2.64675 2.65959   1
   6   4  -1 0.01936 0.78220   8
   6   4  -1 0.59783 1.49444  10
  -6  -4   1 0.21308 1.14815  10
  -6  -4   1 0.15701 1.17954   2
  -6  -4   1 -0.2374 0.94782   6
  -6  -4   1 -0.1833 5.31132  12
  -6  -4   1 1.41333 1.21791   9
  -6  -4   1 1.87899 1.21830  11
  -6  -4   1 -1.4377 3.81935  13
  -6  -4   1 2.29923 2.83660   1
  -6  -4   1 0.96129 1.19003   4
   5   4  -1 632.117 18.1324   9
   5   4  -1 624.204 17.5384   8
   5   4  -1 626.883 18.9247   4
   5   4  -1 652.439 32.6572  12
   5   4  -1 648.671 20.0773   2
   5   4  -1 634.887 18.7551  11
   5   4  -1 628.639 18.6724   7
   5   4  -1 612.709 32.3846   1
  -5  -4   1 637.442 18.3417   9
  -5  -4   1 644.116 34.8507  12
  -5  -4   1 620.119 19.4691   2
  -5  -4   1 636.091 29.9486  13
  -5  -4   1 624.239 18.0070   6
  -5  -4   1 610.913 20.0966  10
  -5  -4   1 665.436 34.0042   1
  -5  -4   1 638.232 18.6159  11
   4   4  -1 33.2485 3.53949  10
   4   4  -1 35.4614 8.14756   1
   4   4  -1 32.1934 2.87922  11
   4   4  -1 29.9667 2.91721   4
   4   4  -1 30.4729 2.58629   9
   4   4  -1 30.5413 3.06768   7
   4   4  -1 35.4618 2.84777   6
   4   4  -1 42.6190 7.65277  12
   4   4  -1 33.0545 3.38595   2
  -4  -4   1 31.9900 2.80321  11
  -4  -4   1 32.3223 6.05659  13
  -4  -4   1 31.3223 3.33923  10
  -4  -4   1 43.0083 8.44751  12
  -4  -4   1 29.7537 2.74387   6
  -4  -4   1 31.1417 3.11083   2
  -4  -4   1 29.1391 2.59016   9
  -4  -4   1 23.4923 6.79156   1
  -4  -4   1 33.0291 3.20887   4
   3   4  -1 6471.25 144.937   4
   3   4  -1 6462.21 146.108  10
   3   4  -1 6554.19 143.270   9
   3   4  -1 6511.78 144.398   6
   3   4  -1 6730.34 163.071   1
   3   4  -1 6455.59 143.987  11
   3   4  -1 6494.83 146.100   2
  -3  -4   1 6495.73 145.786   2
  -3  -4   1 6393.42 145.647  10
  -3  -4   1 6698.54 164.191   1
  -3  -4   1 6544.38 145.215   4
  -3  -4   1 6352.97 155.391  13
  -3  -4   1 6611.81 143.996  11
  -3  -4   1 6584.36 143.353   9
   2   4  -1 273.840 8.27708  11
   2   4  -1 287.261 16.6605   1
   2   4  -1 279.281 9.92786   2
   2   4  -1 269.539 8.81218   6
   2   4  -1 271.618 19.1953  12
   2   4  -1 284.980 7.56860   9
   2   4  -1 278.747 9.14073   4
   2   4  -1 275.031 9.70214  10
  -2  -4   1 279.173 9.39511   4
  -2  -4   1 265.527 9.47611  10
  -2  -4   1 281.318 7.73468   9
  -2  -4   1 276.122 8.97299   6
  -2  -4   1 282.576 20.8663  12
  -2  -4   1 278.573 8.37138   5
  -2  -4   1 274.150 9.72845   2
  -2  -4   1 268.557 10.9630  13
   1   4  -1 231.338 7.07435   5
   1   4  -1 230.255 17.4093  12
   1   4  -1 237.569 8.65313   2
   1   4  -1 234.332 7.84835   4
   1   4  -1 231.452 13.3528   1
   1   4  -1 225.423 7.47932   6
   1   4  -1 235.682 8.32014  10
  -1  -4   1 225.629 18.7513  12
  -1  -4   1 243.227 13.7864   1
  -1  -4   1 227.684 8.39525   2
  -1  -4   1 234.415 8.22994  10
  -1  -4   1 231.416 7.60906   6
  -1  -4   1 239.123 6.98494   5
   0   4  -1 4.11163 0.96111   6
   0   4  -1 2.93057 1.12853   2
   0   4  -1 2.70325 2.39177  12
   0   4  -1 4.75341 1.36277  10
   0   4  -1 1.90523 1.52785   1
   0   4  -1 2.87244 0.97212   3
   0   4  -1 3.56939 1.14197   5
   0  -4   1 6.56624 1.65676  10
   0  -4   1 3.57537 0.87969   5
   0  -4   1 3.00254 2.81195  12
   0  -4   1 3.28830 0.92348   6
  -1   4  -1 38.2749 2.23200   9
  -1   4  -1 44.1385 3.79021   1
  -1   4  -1 45.4861 2.72038   3
  -1   4  -1 40.2001 2.74102   5
  -1   4  -1 41.0226 3.56592  10
  -1   4  -1 37.7495 7.37927  12
  -1   4  -1 40.0654 5.73464  13
  -1   4  -1 40.8925 2.28907   6
  -1   4  -1 35.0062 4.36846   1
   1  -4   1 42.2062 2.39993   6
  -2   4  -1 26.4799 2.24994   9
  -2   4  -1 32.3758 6.35087  13
  -2   4  -1 25.0045 2.47014   5
  -2   4  -1 27.0005 2.23585   3
  -2   4  -1 19.3458 5.39977  12
  -2   4  -1 30.6494 3.76719  10
  -2   4  -1 23.1192 1.57720   6
   2  -4   1 23.6735 2.02302   3
   2  -4   1 25.3441 1.82730   6
  -3   4  -1 335.316 11.3602   3
  -3   4  -1 352.752 11.9389  11
  -3   4  -1 333.269 10.3125   4
  -3   4  -1 343.247 21.0316  12
  -3   4  -1 377.250 24.3530  13
  -3   4  -1 360.394 12.1048   5
  -3   4  -1 343.626 11.2205   9
  -3   4  -1 344.409 8.84480   6
   3  -4   1 345.653 10.2189   3
  -4   4  -1 83.2939 5.33597   3
  -4   4  -1 77.7991 10.2739  12
  -4   4  -1 85.9466 4.90146   7
  -4   4  -1 61.2194 10.7585  13
  -4   4  -1 89.6746 5.74643   5
  -4   4  -1 91.4375 5.79201  11
  -4   4  -1 86.7658 4.46651   4
  -4   4  -1 80.9428 5.09381   9
   4  -4   1 83.2738 4.14218   3
  -5   4  -1 468.173 15.5243   7
  -5   4  -1 495.089 16.5280   9
  -5   4  -1 501.722 16.9683  11
  -5   4  -1 494.802 14.9042   4
  -5   4  -1 525.419 19.1471   1
  -5   4  -1 478.605 30.9778  13
  -5   4  -1 501.441 17.1878   5
  -5   4  -1 457.929 25.6681  12
  -5   4  -1 512.551 15.1265   3
   5  -4   1 502.982 14.2139   3
   5  -4   1 468.377 22.6780   1
  -6   4  -1 584.342 23.7345   1
  -6   4  -1 617.909 20.7394   5
  -6   4  -1 597.041 16.7997   7
  -6   4  -1 603.111 18.0930   4
  -6   4  -1 608.570 20.0484   9
  -6   4  -1 600.211 20.2317  11
   6  -4   1 603.716 17.1753   3
   6  -4   1 617.235 27.6301   1
  -7   4  -1 386.747 11.3669   7
  -7   4  -1 383.971 12.0996   8
  -7   4  -1 374.875 13.6089   4
  -7   4  -1 400.605 16.3922   5
  -7   4  -1 368.796 15.5128  11
  -7   4  -1 401.334 15.8015   9
  -7   4  -1 383.326 19.8029   1
   7  -4   1 391.127 22.1963   1
   7  -4   1 401.349 12.8838   3
  -8   4  -1 1.37461 1.38866   8
  -8   4  -1 0.48781 1.78407  11
  -8   4  -1 2.62326 2.13582   9
  -8   4  -1 0.73777 1.46127   4
  -8   4  -1 7.13722 3.68217   2
  -8   4  -1 4.35361 2.49936   5
  -8   4  -1 3.12644 4.98905   1
   8  -4   1 0.80726 1.37431   3
   8  -4   1 -3.0001 4.23008   1
  -9   4  -1 0.39288 1.52105   4
  -9   4  -1 -0.2267 1.86522   5
  -9   4  -1 -1.0297 1.81830   9
   9  -4   1 2.60677 1.73890   3
 -10   4  -1 23.3920 5.73435   5
 -10   4  -1 6.43952 5.32948   2
 -10   4  -1 18.5769 3.83041   4
 -10   4  -1 18.3101 4.51347   9
  10  -4   1 18.2387 3.61845   3
 -11   4  -1 159.508 12.1680   5
 -11   4  -1 147.948 9.67417   4
 -11   4  -1 137.881 12.5190   2
 -11   4  -1 155.089 11.4674   9
  11  -4   1 156.277 8.21908   3
 -12   4  -1 59.2269 12.9653   5
 -12   4  -1 55.5063 7.43777   9
 -12   4  -1 58.2323 6.60323   4
  12  -4   1 39.8715 5.14606   3
 -13   4  -1 53.0537 7.36433   9
 -13   4  -1 52.9679 6.61685   4
 -13   4  -1 54.5391 8.32728   5
  13  -4   1 49.7277 5.32937   3
 -14   4  -1 168.937 14.8446   5
 -14   4  -1 166.804 11.5687   4
 -14   4  -1 156.319 13.2693   9
  14  -4   1 173.431 9.77812   3
  16   3  -1 -1.8495 5.39049   3
 -16  -3   1 10.2512 4.66873   5
 -16  -3   1 2.52046 4.06476   9
 -16  -3   1 2.78571 2.83677   6
 -16  -3   1 10.1076 4.29598   4
  15   3  -1 4.71592 4.49666   7
  15   3  -1 -1.8743 3.82535   3
 -15  -3   1 2.11373 3.82443   9
 -15  -3   1 -3.8042 2.59257   4
 -15  -3   1 2.72441 2.24474   6
  14   3  -1 0.58739 3.03699   3
  14   3  -1 1.67651 3.64561  11
 -14  -3   1 0.77955 2.54848   4
 -14  -3   1 3.24083 3.15982   9
 -14  -3   1 0.82232 2.19560   6
  13   3  -1 6.16434 3.89423  11
  13   3  -1 8.08599 3.42560   7
  13   3  -1 17.6107 5.12096   3
 -13  -3   1 10.6933 3.96419   4
 -13  -3   1 12.2227 4.37614   9
 -13  -3   1 18.0950 3.53879   6
  12   3  -1 13.7411 4.75566  11
  12   3  -1 14.5597 3.22310   7
 -12  -3   1 20.1861 4.61895   2
 -12  -3   1 19.5450 3.61844   6
 -12  -3   1 14.2865 4.03539   4
 -12  -3   1 12.9153 3.91030   9
  11   3  -1 6.72209 2.18358   7
  11   3  -1 -0.8737 3.05353   2
  11   3  -1 5.61402 3.32430  11
 -11  -3   1 2.18695 2.55602   9
 -11  -3   1 7.32615 3.35075   2
 -11  -3   1 5.07501 1.96588   6
 -11  -3   1 3.79084 2.71528   4
  10   3  -1 474.762 18.6511   4
  10   3  -1 500.870 43.3446   1
  10   3  -1 512.148 16.7357   7
  10   3  -1 506.843 23.4521   2
  10   3  -1 536.218 21.1809  11
  10   3  -1 481.367 19.6270   9
 -10  -3   1 483.438 21.7004  10
 -10  -3   1 495.158 37.1188   1
 -10  -3   1 517.338 19.8445   4
 -10  -3   1 508.428 19.7907   2
 -10  -3   1 471.144 19.6788  11
 -10  -3   1 504.350 19.9627   9
 -10  -3   1 534.675 16.7755   6
   9   3  -1 16.4382 3.11183   7
   9   3  -1 14.5657 3.94608  11
   9   3  -1 18.0010 5.03207   2
   9   3  -1 14.9393 2.25622   8
   9   3  -1 14.3270 3.16197   4
   9   3  -1 13.7986 7.62953   1
   9   3  -1 8.33877 2.58941   9
  -9  -3   1 21.2156 4.29413   4
  -9  -3   1 15.2577 3.48530   9
  -9  -3   1 19.0332 3.13182   6
  -9  -3   1 13.6789 4.42766  10
  -9  -3   1 16.5818 3.64476   2
  -9  -3   1 18.6337 8.08750   1
  -9  -3   1 18.5123 3.85735  11
   8   3  -1 545.437 21.4314   2
   8   3  -1 545.272 15.3120   8
   8   3  -1 535.542 18.8730   9
   8   3  -1 557.942 16.7871   6
   8   3  -1 501.629 33.6190   1
   8   3  -1 546.309 18.6328   4
  -8  -3   1 533.105 21.0227  10
  -8  -3   1 546.493 19.4135  11
  -8  -3   1 530.929 19.1868   2
  -8  -3   1 570.452 16.8963   6
  -8  -3   1 615.986 36.8231   1
  -8  -3   1 461.442 21.5024   9
  -8  -3   1 534.551 20.0154   4
   7   3  -1 13.4832 2.63461   4
   7   3  -1 16.4374 2.79181   7
   7   3  -1 15.8007 2.49357   6
   7   3  -1 19.1152 6.53568   1
   7   3  -1 11.4450 2.88935  11
   7   3  -1 11.5926 5.60956  12
   7   3  -1 15.3383 2.02378   8
   7   3  -1 19.2671 2.79585   9
   7   3  -1 11.5168 3.25505   2
  -7  -3   1 14.6823 2.89350   9
  -7  -3   1 9.82745 6.33997  12
  -7  -3   1 16.5526 3.87169  10
  -7  -3   1 7.79352 2.34815   2
  -7  -3   1 5.30079 6.36484  13
  -7  -3   1 16.1817 3.12938   4
  -7  -3   1 16.2557 2.38161   6
  -7  -3   1 16.8452 3.36424  11
  -7  -3   1 14.4701 6.19157   1
   6   3  -1 196.501 17.9103   1
   6   3  -1 188.968 8.65012   9
   6   3  -1 196.690 8.75728   4
   6   3  -1 176.199 8.59194   6
   6   3  -1 189.822 7.86471   7
   6   3  -1 200.054 9.88665   2
   6   3  -1 193.233 7.01795   8
   6   3  -1 166.909 14.5552  12
   6   3  -1 188.387 9.00140  11
  -6  -3   1 196.281 18.1471  13
  -6  -3   1 190.140 7.71524   6
  -6  -3   1 191.052 8.70377   9
  -6  -3   1 192.722 17.8781   1
  -6  -3   1 191.263 9.94403  10
  -6  -3   1 194.491 8.98757   4
  -6  -3   1 185.892 16.3346  12
  -6  -3   1 196.124 8.93639  11
  -6  -3   1 185.451 9.39520   2
   5   3  -1 27.0235 3.40032   2
   5   3  -1 26.4223 2.83973   9
   5   3  -1 31.3332 3.19779  11
   5   3  -1 27.1986 2.70067   7
   5   3  -1 26.5576 2.52287   6
   5   3  -1 31.0690 8.10074   1
   5   3  -1 26.2618 2.33441   8
   5   3  -1 26.9461 3.54233   4
   5   3  -1 23.2305 5.82147  12
  -5  -3   1 25.6452 2.54314   6
  -5  -3   1 29.4622 3.19889   4
  -5  -3   1 34.1572 7.22391  12
  -5  -3   1 31.0443 3.04653   9
  -5  -3   1 29.6114 3.22510   2
  -5  -3   1 27.2193 2.96931  11
  -5  -3   1 23.8277 7.00463   1
  -5  -3   1 18.3381 7.27431  13
   4   3  -1 112.232 5.30866   9
   4   3  -1 127.752 12.2519   1
   4   3  -1 111.826 6.43281  10
   4   3  -1 108.032 5.01545   6
   4   3  -1 116.348 6.14743   2
   4   3  -1 116.917 5.50443   7
   4   3  -1 112.848 4.86195   8
   4   3  -1 110.809 5.54499   4
   4   3  -1 107.814 5.45568  11
   4   3  -1 113.284 10.9396  12
  -4  -3   1 110.943 11.6003   1
  -4  -3   1 111.320 5.68603   4
  -4  -3   1 117.016 5.17904   6
  -4  -3   1 111.217 5.33793   9
  -4  -3   1 110.835 10.3330  13
  -4  -3   1 113.012 6.29494  10
  -4  -3   1 110.722 11.5787  12
  -4  -3   1 112.062 5.88258   2
  -4  -3   1 109.756 5.37781  11
   3   3  -1 27.9029 2.73387   2
   3   3  -1 24.6433 2.70052  10
   3   3  -1 28.0880 2.19825   9
   3   3  -1 26.8006 2.28566  11
   3   3  -1 34.5024 5.97026   1
   3   3  -1 27.4853 2.50129   4
   3   3  -1 21.1443 5.13645  12
   3   3  -1 26.2962 2.22100   6
  -3  -3   1 21.2279 4.36854  13
  -3  -3   1 25.7535 2.60294   2
  -3  -3   1 25.4452 2.15541   9
  -3  -3   1 28.6687 6.50906   1
  -3  -3   1 27.9854 2.74915  10
  -3  -3   1 26.0069 2.52359   4
  -3  -3   1 23.8716 6.21288  12
  -3  -3   1 25.8775 2.21794   6
  -3  -3   1 25.2552 2.20372  11
   2   3  -1 1996.53 46.9316   6
   2   3  -1 2079.44 63.0032  12
   2   3  -1 2034.67 48.0127  10
   2   3  -1 2022.58 46.1327   9
   2   3  -1 2063.17 46.5614  11
   2   3  -1 2010.84 47.4516   4
   2   3  -1 2035.10 48.2238   2
   2   3  -1 2054.23 58.9738   1
  -2  -3   1 2075.60 59.6739   1
  -2  -3   1 2124.82 51.8539  13
  -2  -3   1 2045.24 47.6081   4
  -2  -3   1 2029.65 47.8727  10
  -2  -3   1 2082.98 46.2969   9
  -2  -3   1 2033.90 48.0925   2
  -2  -3   1 2048.04 47.1104   6
  -2  -3   1 2077.86 65.1264  12
  -2  -3   1 2067.18 46.5022  11
   1   3  -1 9.11048 0.84496   9
   1   3  -1 7.13007 2.39423   1
   1   3  -1 9.35957 1.66988   2
   1   3  -1 11.3033 1.53676  10
   1   3  -1 7.95530 0.95237  11
   1   3  -1 9.51632 1.34085   4
   1   3  -1 8.49863 0.97551   5
   1   3  -1 8.23207 1.28224   6
   1   3  -1 9.53869 3.05695  12
  -1  -3   1 9.50633 1.25227   6
  -1  -3   1 8.61188 1.01642   9
  -1  -3   1 9.33995 1.04839   5
  -1  -3   1 9.69622 1.62572   2
  -1  -3   1 9.42919 1.35969  10
  -1  -3   1 9.88120 4.37893  12
   0   3  -1 1467.51 39.0889   1
   0   3  -1 1469.12 33.2323   5
   0   3  -1 1496.34 47.5332  12
   0   3  -1 1443.13 34.3905  10
   0   3  -1 1433.67 34.6051   2
   0   3  -1 1425.80 33.4507   6
   0   3  -1 1482.89 37.1276  13
   0  -3   1 1440.16 39.1331   1
   0  -3   1 1417.27 33.4790   6
   0  -3   1 1467.34 34.5711  10
   0  -3   1 1424.11 32.7964   5
   0  -3   1 1516.05 36.8849  13
   0  -3   1 1486.09 51.0807  12
  -1   3  -1 28.9709 2.71584  10
  -1   3  -1 30.9731 2.10171   5
  -1   3  -1 28.8419 1.71469   6
  -1   3  -1 31.2192 1.96953   3
  -1   3  -1 27.7895 4.26475  13
  -1   3  -1 37.7053 5.43780  12
   1  -3   1 30.3062 1.84785   6
  -2   3  -1 646.090 15.2483   6
  -2   3  -1 617.102 16.1177   3
  -2   3  -1 659.346 27.1579  12
  -2   3  -1 655.940 26.5593  13
  -2   3  -1 642.779 16.7498   9
  -2   3  -1 643.007 17.2224  11
  -2   3  -1 635.481 17.1952   5
   2  -3   1 630.092 15.8802   3
   2  -3   1 657.293 15.7053   6
  -3   3  -1 21.8937 1.30064   6
  -3   3  -1 23.0223 2.19285   7
  -3   3  -1 23.9839 2.50470  11
  -3   3  -1 20.1243 2.38209   3
  -3   3  -1 23.6275 2.40998   9
  -3   3  -1 20.1111 1.98977   4
  -3   3  -1 19.6983 4.94886  12
  -3   3  -1 16.5075 5.34871  13
   3  -3   1 22.2334 1.81458   3
  -4   3  -1 87.5411 11.1521  13
  -4   3  -1 88.9064 4.60343   3
  -4   3  -1 93.5853 4.63049   4
  -4   3  -1 96.2418 5.52762  11
  -4   3  -1 82.9376 4.97320   7
  -4   3  -1 91.7289 5.29610   9
  -4   3  -1 89.9225 6.63760   1
  -4   3  -1 87.7068 9.77687  12
   4  -3   1 102.597 7.52393   1
   4  -3   1 89.4380 4.07979   3
  -5   3  -1 0.64925 1.08063  11
  -5   3  -1 8.45828 5.07713  12
  -5   3  -1 1.84448 1.32483   9
  -5   3  -1 2.10655 1.17819   4
  -5   3  -1 2.37184 1.88068   1
  -5   3  -1 -6.4257 4.04220  13
  -5   3  -1 2.37429 1.13073   7
   5  -3   1 4.58331 2.52723   1
   5  -3   1 1.61640 0.99392   3
  -6   3  -1 366.045 12.4978   4
  -6   3  -1 366.242 14.0454   9
  -6   3  -1 364.709 10.8249   7
  -6   3  -1 364.597 14.1739  11
  -6   3  -1 356.429 18.4980   1
  -6   3  -1 366.562 10.7431   8
   6  -3   1 349.088 12.3806   4
   6  -3   1 339.892 18.5672   1
   6  -3   1 365.600 12.0305   3
  -7   3  -1 15.4148 4.79443   1
  -7   3  -1 14.5831 2.74780   4
  -7   3  -1 14.7632 1.96770   8
  -7   3  -1 13.8421 4.81095   9
  -7   3  -1 14.4943 3.27475  11
  -7   3  -1 14.6676 1.98389   7
  -7   3  -1 13.7136 4.78467   2
   7  -3   1 13.8078 5.36417   1
   7  -3   1 19.0952 3.24156   4
   7  -3   1 19.5748 2.98021   3
  -8   3  -1 10.8275 1.73672   7
  -8   3  -1 8.62384 2.77815   9
  -8   3  -1 8.12401 4.26258   1
  -8   3  -1 9.90187 2.59591   4
  -8   3  -1 8.22100 2.96060  11
  -8   3  -1 2.84233 4.00189   2
   8  -3   1 11.1432 2.69050   3
   8  -3   1 14.0035 3.05807   4
   8  -3   1 3.35427 4.62746   1
  -9   3  -1 97.2088 9.48457   2
  -9   3  -1 77.6956 11.1039   1
  -9   3  -1 95.0737 6.75616   4
  -9   3  -1 86.9772 7.53712  11
  -9   3  -1 105.358 8.33552   9
   9  -3   1 90.4126 12.2599   1
   9  -3   1 98.6108 6.57024   3
   9  -3   1 84.3467 6.43225   4
 -10   3  -1 202.340 12.4750   9
 -10   3  -1 173.007 13.2059   2
 -10   3  -1 216.491 11.0248   4
 -10   3  -1 219.616 13.2157   5
  10  -3   1 206.419 10.1576   3
 -11   3  -1 26.3996 5.68337   5
 -11   3  -1 20.5591 4.30433   4
 -11   3  -1 33.5049 6.61408   2
 -11   3  -1 29.8763 5.82848   9
  11  -3   1 23.4051 4.51414   3
 -12   3  -1 7.83643 2.95793   4
 -12   3  -1 1.30121 2.73052   9
 -12   3  -1 3.14801 3.84131   2
 -12   3  -1 0.64264 2.84627   5
  12  -3   1 2.95551 2.66978   3
 -13   3  -1 0.61482 3.06072   5
 -13   3  -1 -0.0525 3.40829   9
 -13   3  -1 3.31297 2.78904   4
  13  -3   1 -4.9212 2.61559   3
 -14   3  -1 65.8587 7.57565   4
 -14   3  -1 49.8101 9.17395   5
 -14   3  -1 65.3177 8.60878   9
  14  -3   1 68.2481 10.5891   3
 -15   3  -1 33.5034 7.44996   9
 -15   3  -1 37.4181 6.73575   4
 -15   3  -1 42.9220 8.80580   5
  15  -3   1 44.2154 6.49901   3
  16   2  -1 6.49819 5.84939   3
 -16  -2   1 4.68192 3.12072   4
 -16  -2   1 5.70843 4.58773   5
 -16  -2   1 0.86468 2.52593   6
 -16  -2   1 0.98229 3.28979   9
  15   2  -1 238.910 16.5226   3
 -15  -2   1 251.765 15.3876   4
 -15  -2   1 230.243 16.0240   5
 -15  -2   1 258.538 17.1238   9
 -15  -2   1 248.267 10.7914   6
  14   2  -1 30.3530 5.03766   7
  14   2  -1 29.3418 6.61780   3
 -14  -2   1 34.7053 4.37031   6
 -14  -2   1 32.3579 7.70822   9
 -14  -2   1 40.6353 6.19852   4
  13   2  -1 208.512 13.0757   3
  13   2  -1 195.789 14.3612  11
  13   2  -1 202.375 9.91757   7
 -13  -2   1 178.479 12.9262   6
 -13  -2   1 216.426 13.1739   4
 -13  -2   1 207.760 14.0582   9
  12   2  -1 29.3396 6.33733  11
  12   2  -1 14.8380 4.35299   3
 -12  -2   1 22.7174 3.61598   6
 -12  -2   1 15.1376 4.62793   9
 -12  -2   1 14.0655 4.03297   4
 -12  -2   1 20.5858 4.82181   2
  11   2  -1 63.3932 7.52463  11
  11   2  -1 47.0275 6.16183   3
  11   2  -1 44.6630 9.74269   4
  11   2  -1 69.5174 5.08175   7
 -11  -2   1 60.8432 6.63193   4
 -11  -2   1 58.2403 6.73794   2
 -11  -2   1 47.3481 6.47473   9
 -11  -2   1 63.7057 4.91466   6
  10   2  -1 14.5820 3.29910   9
  10   2  -1 25.8009 8.27690   1
  10   2  -1 17.6608 4.62347  11
  10   2  -1 18.5581 3.56592   4
 -10  -2   1 12.8390 3.97626  11
 -10  -2   1 13.7268 3.82928   9
 -10  -2   1 16.0015 3.79272   4
 -10  -2   1 13.6723 3.33634   2
 -10  -2   1 5.18630 4.99367   1
 -10  -2   1 12.6245 4.13718  10
 -10  -2   1 14.6608 2.84353   6
   9   2  -1 49.4106 7.04945   2
   9   2  -1 41.9349 8.21015   9
   9   2  -1 47.3816 5.77517  11
   9   2  -1 56.1046 13.5683   1
   9   2  -1 48.7371 4.07148   7
   9   2  -1 47.4210 4.97371   4
  -9  -2   1 56.4357 5.96088   9
  -9  -2   1 48.7077 9.89597  10
  -9  -2   1 40.8197 5.20668   2
  -9  -2   1 45.7143 12.2857   1
  -9  -2   1 44.2137 5.06776   4
  -9  -2   1 52.8031 4.09285   6
   8   2  -1 6.58701 4.68553   1
   8   2  -1 2.38428 1.24691   8
   8   2  -1 0.53212 1.24224   4
   8   2  -1 2.28904 1.86852  11
   8   2  -1 3.12544 1.32567   7
   8   2  -1 1.15971 1.33737   9
   8   2  -1 5.98774 2.79185   2
  -8  -2   1 3.52791 1.90106   4
  -8  -2   1 4.21903 1.62900   6
  -8  -2   1 4.92126 2.62933  10
  -8  -2   1 4.39028 1.68424   2
  -8  -2   1 2.88543 1.77748  11
  -8  -2   1 3.99969 1.96717   9
   7   2  -1 33.7890 4.16485  11
   7   2  -1 27.2508 2.73000   6
   7   2  -1 31.0001 8.45154   1
   7   2  -1 21.5201 3.06299   4
   7   2  -1 34.2785 2.98603   7
   7   2  -1 29.0250 4.47858   2
   7   2  -1 17.7059 5.66948  12
   7   2  -1 26.8716 2.48669   8
   7   2  -1 24.2686 3.33843   9
  -7  -2   1 17.1712 6.98433  12
  -7  -2   1 26.5817 3.45753   4
  -7  -2   1 36.1531 3.97435  11
  -7  -2   1 27.8665 3.65281   9
  -7  -2   1 46.9586 10.7661   1
  -7  -2   1 14.4539 8.35156  13
  -7  -2   1 29.7660 2.85919   6
  -7  -2   1 28.4398 3.67484   2
  -7  -2   1 25.9682 4.74319  10
   6   2  -1 4.94392 3.83840  12
   6   2  -1 3.92199 1.46081   4
   6   2  -1 1.03683 0.95230   6
   6   2  -1 2.71272 1.59360   9
   6   2  -1 -1.4953 1.03137   2
   6   2  -1 4.76612 3.98306   1
   6   2  -1 -0.3156 0.86009   7
   6   2  -1 1.40184 1.46200  11
   6   2  -1 1.30661 0.90295   8
  -6  -2   1 1.64469 1.00742   6
  -6  -2   1 -1.9270 4.20981  13
  -6  -2   1 2.33603 1.27826   4
  -6  -2   1 3.64757 2.17091   2
  -6  -2   1 3.23342 4.08548  12
  -6  -2   1 3.09207 1.65219  10
  -6  -2   1 1.76746 1.39101   9
  -6  -2   1 2.36707 1.40034  11
  -6  -2   1 4.58082 4.18948   1
   5   2  -1 2532.17 62.5252   2
   5   2  -1 2621.09 79.2811   1
   5   2  -1 2496.92 60.5634   9
   5   2  -1 2555.67 58.7639   6
   5   2  -1 2554.24 57.8963   8
   5   2  -1 2550.90 58.8934   7
   5   2  -1 2524.30 61.1217  11
   5   2  -1 2581.03 71.7791  12
   5   2  -1 2491.83 60.2988   4
  -5  -2   1 2535.95 61.4395   2
  -5  -2   1 2503.67 58.6540   6
  -5  -2   1 2550.76 60.6518   4
  -5  -2   1 2720.56 74.9028  12
  -5  -2   1 2526.81 60.9924  11
  -5  -2   1 2601.81 79.9967  13
  -5  -2   1 2617.57 79.9252   1
  -5  -2   1 2539.82 60.7055   9
   4   2  -1 1.85396 1.88925   1
   4   2  -1 0.40613 0.59205   6
   4   2  -1 0.42219 0.62475   8
   4   2  -1 1.38808 0.89331   4
   4   2  -1 0.71992 0.95545  11
   4   2  -1 0.30423 0.68184   7
   4   2  -1 3.18132 2.35377  12
   4   2  -1 0.19981 0.76456   2
   4   2  -1 0.93341 0.80897   9
  -4  -2   1 0.16903 0.77699   2
  -4  -2   1 -0.0542 0.58424   4
  -4  -2   1 -1.1293 0.63341  11
  -4  -2   1 2.51174 2.01948   1
  -4  -2   1 0.59685 0.86252  10
  -4  -2   1 6.59494 3.70870  13
  -4  -2   1 0.39851 0.72968   9
  -4  -2   1 0.16001 0.59557   6
   3   2  -1 242.073 14.2471  12
   3   2  -1 231.609 7.18153   8
   3   2  -1 229.983 8.03707   4
   3   2  -1 238.516 8.72001   2
   3   2  -1 235.916 7.76839   7
   3   2  -1 225.712 7.89479  11
   3   2  -1 229.684 7.76294   9
   3   2  -1 232.862 7.37994   6
   3   2  -1 235.146 9.02595  10
  -3  -2   1 231.556 7.83399   9
  -3  -2   1 234.684 7.91303  11
  -3  -2   1 232.593 8.79237  10
  -3  -2   1 241.659 13.7036  13
  -3  -2   1 229.797 7.34857   6
  -3  -2   1 231.848 8.48206   2
  -3  -2   1 237.674 14.7143  12
  -3  -2   1 249.516 15.7311   1
  -3  -2   1 238.007 8.19004   4
   2   2  -1 0.96726 0.72376  10
   2   2  -1 -0.1712 1.68164  12
   2   2  -1 0.53794 0.41857   9
   2   2  -1 0.97356 0.57994   8
   2   2  -1 0.87552 0.60062  11
   2   2  -1 1.32322 0.59114   6
   2   2  -1 1.32263 1.37084   1
   2   2  -1 0.43188 0.49456   4
   2   2  -1 0.79283 0.75348   2
  -2  -2   1 0.77772 0.66020  10
  -2  -2   1 1.01660 0.54933  11
  -2  -2   1 0.38204 0.49961   6
  -2  -2   1 0.29995 0.49866   9
  -2  -2   1 3.43421 2.42800  12
  -2  -2   1 0.38396 1.05371   1
  -2  -2   1 -0.4946 1.23403  13
  -2  -2   1 0.95398 0.60476   2
  -2  -2   1 -0.1632 0.42555   4
   1   2  -1 379.342 9.42393   9
   1   2  -1 382.706 9.31085  11
   1   2  -1 373.691 10.2600   4
   1   2  -1 374.419 10.2523  10
   1   2  -1 381.058 15.4340   1
   1   2  -1 366.538 9.88978   6
  -1  -2   1 361.313 10.4727   2
  -1  -2   1 391.891 10.9607  13
  -1  -2   1 366.817 10.1486  10
  -1  -2   1 380.760 9.29842  11
  -1  -2   1 387.119 10.4634   4
  -1  -2   1 380.807 9.54209   9
   0   2  -1 6.98252 2.53738  12
   0   2  -1 7.90029 1.37270  13
   0   2  -1 12.7620 1.20687  10
   0   2  -1 11.3515 1.89966   1
   0   2  -1 11.3570 0.78826   5
   0   2  -1 11.7475 1.27296   2
   0   2  -1 10.1937 0.96445   6
   0  -2   1 10.2061 1.16807   2
   0  -2   1 11.8971 1.19318  10
   0  -2   1 11.7605 1.07008   6
   0  -2   1 12.5838 0.75980   5
   0  -2   1 12.7693 2.43245   1
   0  -2   1 7.91485 1.30665  13
  -1   2  -1 761.322 23.7368  13
  -1   2  -1 716.914 16.9756   6
  -1   2  -1 681.780 16.8995   3
  -1   2  -1 779.617 27.0230  12
   1  -2   1 712.919 17.0623   6
  -2   2  -1 161.612 5.25218   3
  -2   2  -1 156.665 5.71822   9
  -2   2  -1 161.275 5.40242   4
  -2   2  -1 184.157 11.3068  12
  -2   2  -1 169.814 4.66503   6
  -2   2  -1 156.913 11.1069  13
  -2   2  -1 163.987 5.87233  11
   2  -2   1 158.990 4.73407   3
  -3   2  -1 6014.45 139.854   7
  -3   2  -1 6124.91 138.868   4
  -3   2  -1 6288.02 140.101  11
  -3   2  -1 6667.10 151.644  12
  -3   2  -1 6191.77 139.865   9
  -3   2  -1 6519.97 157.787  13
  -3   2  -1 6477.12 138.714   3
  -3   2  -1 6239.69 143.472   1
   3  -2   1 6293.94 140.460  11
   3  -2   1 6333.90 138.100   3
   3  -2   1 6338.29 143.066   1
  -4   2  -1 156.342 14.6339  13
  -4   2  -1 178.564 6.81207   7
  -4   2  -1 172.079 7.40826   9
  -4   2  -1 168.156 6.64027   4
  -4   2  -1 171.495 7.49432  11
  -4   2  -1 172.394 13.0919  12
  -4   2  -1 171.837 10.0878   1
   4  -2   1 185.986 8.02794  11
   4  -2   1 184.767 6.80011   4
   4  -2   1 175.004 6.64240   3
   4  -2   1 178.607 10.4159   1
  -5   2  -1 4.99236 1.23991   7
  -5   2  -1 1.21857 1.23502   9
  -5   2  -1 3.64671 1.35625   4
  -5   2  -1 -0.7369 3.70290  13
  -5   2  -1 4.34538 2.56565   1
  -5   2  -1 2.02968 0.60260   6
  -5   2  -1 -2.6564 4.22290  12
  -5   2  -1 4.31201 1.59874  11
   5  -2   1 5.00178 1.49509   4
   5  -2   1 3.22541 2.36322   1
   5  -2   1 2.04920 1.40226  11
   5  -2   1 3.92926 1.53357   3
  -6   2  -1 26.2559 3.52470   9
  -6   2  -1 18.8190 4.92750   1
  -6   2  -1 30.2843 4.44115   2
  -6   2  -1 24.6206 2.18333   7
  -6   2  -1 22.0854 3.50953  11
  -6   2  -1 23.3264 2.87574   4
   6  -2   1 20.8152 2.73875   4
   6  -2   1 22.9932 3.20151   3
   6  -2   1 18.9146 5.08148   1
   6  -2   1 26.4165 3.77348  11
  -7   2  -1 30.9769 3.58510   4
  -7   2  -1 39.6299 6.58991   2
  -7   2  -1 19.4838 5.63268   1
  -7   2  -1 29.4245 2.47288   7
  -7   2  -1 25.1725 3.79663  11
  -7   2  -1 28.5137 3.99360   9
   7  -2   1 30.3978 7.66534   1
   7  -2   1 32.9786 4.01663   3
   7  -2   1 27.7158 3.30959   4
   7  -2   1 28.8740 5.02115  11
  -8   2  -1 24.0597 4.59602  11
  -8   2  -1 22.7975 5.13934   2
  -8   2  -1 24.6024 3.58495   4
  -8   2  -1 19.5754 4.03273   9
  -8   2  -1 7.99021 4.95720   1
  -8   2  -1 21.2429 2.25711   7
   8  -2   1 19.7382 4.04737   3
   8  -2   1 20.4957 4.46348  11
   8  -2   1 25.5479 3.61163   4
   8  -2   1 16.4817 5.24975   1
  -9   2  -1 9.10140 3.18395   9
  -9   2  -1 9.51325 1.77251   7
  -9   2  -1 10.1045 4.08621   2
  -9   2  -1 7.32407 2.63074   4
  -9   2  -1 11.1189 3.26802  11
   9  -2   1 11.3367 2.79837   4
   9  -2   1 8.38683 3.10931   3
   9  -2   1 16.5590 5.68433   1
 -10   2  -1 49.2317 7.43973   2
 -10   2  -1 49.6525 5.31428   4
 -10   2  -1 48.8366 6.30337   9
  10  -2   1 50.5113 5.98300   3
 -11   2  -1 787.438 26.5225   4
 -11   2  -1 790.460 28.8156   2
 -11   2  -1 819.195 29.3301   9
  11  -2   1 795.079 26.4451   4
  11  -2   1 821.093 26.7144   3
 -12   2  -1 153.370 10.2308   4
 -12   2  -1 120.269 12.7936   2
 -12   2  -1 135.185 11.2919   9
  12  -2   1 154.008 9.82810   3
 -13   2  -1 4.93963 4.28764   2
 -13   2  -1 5.71675 3.30064   9
 -13   2  -1 1.03469 2.79749   5
  13  -2   1 -9.1144 4.54199   3
 -14   2  -1 5.86434 4.47405   5
 -14   2  -1 1.10161 2.70376   4
 -14   2  -1 3.11581 3.34423   9
  14  -2   1 4.10003 3.60517   3
 -15   2  -1 -3.7536 3.61025   4
 -15   2  -1 1.99458 3.59790   9
 -15   2  -1 -4.1183 3.65945   5
  15  -2   1 13.0523 3.99983   3
  16   1  -1 -0.1320 4.91022   3
 -16  -1   1 -5.0175 2.70057   4
 -16  -1   1 -2.1608 2.91394   5
 -16  -1   1 5.68667 4.25389   9
  15   1  -1 6.05080 5.99058   3
 -15  -1   1 7.89051 4.48427   5
 -15  -1   1 6.96746 3.88954   9
 -15  -1   1 9.97863 2.58787   6
 -15  -1   1 5.88301 3.48687   4
  14   1  -1 631.987 27.0990   3
 -14  -1   1 548.983 25.8759   9
 -14  -1   1 615.985 24.8146   4
 -14  -1   1 600.982 26.7653   5
 -14  -1   1 603.087 18.2052   6
  13   1  -1 33.7570 7.33445   3
 -13  -1   1 28.9441 6.28288   9
 -13  -1   1 34.3669 4.00632   6
 -13  -1   1 42.2265 6.09275   4
  12   1  -1 63.8863 5.56634   7
  12   1  -1 63.4305 7.63041   3
  12   1  -1 77.9134 9.19456  11
 -12  -1   1 62.6593 7.63575   2
 -12  -1   1 65.9269 7.79381   9
 -12  -1   1 85.3380 7.74801   4
 -12  -1   1 68.1854 4.88527   6
  11   1  -1 5.70525 3.62874  11
  11   1  -1 16.6269 4.77626   3
  11   1  -1 8.19514 2.50676   7
  11   1  -1 9.53256 3.38143   4
 -11  -1   1 12.9208 3.98671   9
 -11  -1   1 11.6946 4.20749   2
 -11  -1   1 10.6534 3.38124   4
 -11  -1   1 14.0817 2.62828   6
  10   1  -1 37.9149 3.81129   7
  10   1  -1 39.7463 5.78574  11
  10   1  -1 40.1518 4.91562   4
  10   1  -1 22.2662 8.29453   1
 -10  -1   1 32.0579 3.32056   6
 -10  -1   1 26.3401 9.66048   1
 -10  -1   1 35.0796 6.13928   2
 -10  -1   1 26.4077 8.71939  11
 -10  -1   1 33.1881 5.97418   9
 -10  -1   1 43.1167 5.24817   4
 -10  -1   1 31.8448 6.70528  10
   9   1  -1 7.89177 2.49828   4
   9   1  -1 9.98604 6.82166   1
   9   1  -1 12.5610 3.82896  11
   9   1  -1 9.96682 2.34752   7
   9   1  -1 10.0256 2.95882   9
   9   1  -1 13.3248 3.48767   3
  -9  -1   1 14.0217 3.60798   2
  -9  -1   1 10.4192 2.87829   4
  -9  -1   1 5.06507 7.15004   1
  -9  -1   1 10.3576 2.02511   6
  -9  -1   1 11.7630 3.53327   9
  -9  -1   1 8.13232 2.90619  11
   8   1  -1 119.181 7.09420   4
   8   1  -1 111.682 8.20411  11
   8   1  -1 100.487 7.20918   9
   8   1  -1 129.710 15.5085   1
   8   1  -1 119.250 5.52718   7
  -8  -1   1 109.322 7.65477   9
  -8  -1   1 118.589 5.47370   6
  -8  -1   1 107.616 7.09631   4
  -8  -1   1 113.103 7.80759  11
  -8  -1   1 81.3229 13.0728   1
  -8  -1   1 102.365 8.54256  10
  -8  -1   1 102.189 7.66587   2
   7   1  -1 13.6376 2.15441   7
   7   1  -1 9.50657 3.88201  12
   7   1  -1 11.7553 3.02301  11
   7   1  -1 7.62260 2.28712   9
   7   1  -1 8.59751 5.10624   1
   7   1  -1 9.98814 2.53405   4
   7   1  -1 12.7146 3.81592   2
  -7  -1   1 14.2408 6.03235   1
  -7  -1   1 11.5102 1.92805   6
  -7  -1   1 11.0542 2.94875   9
  -7  -1   1 14.3856 3.29704  11
  -7  -1   1 9.65024 2.46371   4
  -7  -1   1 8.73439 2.88351   2
  -7  -1   1 10.5273 3.12270  10
  -7  -1   1 0.01847 5.04446  13
   6   1  -1 736.531 18.7601   8
   6   1  -1 712.587 18.8573   6
   6   1  -1 737.320 18.8965   7
   6   1  -1 732.466 25.1064   2
   6   1  -1 716.779 21.8325   9
   6   1  -1 722.187 20.9965   4
   6   1  -1 710.158 25.0638  12
   6   1  -1 732.423 35.4470   1
  -6  -1   1 723.175 21.9084   9
  -6  -1   1 723.452 22.2164  11
  -6  -1   1 746.270 21.4502   4
  -6  -1   1 668.942 25.4007   2
  -6  -1   1 698.281 37.0099  13
  -6  -1   1 723.593 35.5426   1
  -6  -1   1 750.130 19.0111   6
   5   1  -1 0.60537 2.37529  12
   5   1  -1 4.11188 1.16732   7
   5   1  -1 5.73774 1.22443   6
   5   1  -1 4.55275 1.81519  11
   5   1  -1 2.21051 2.77246   1
   5   1  -1 6.97909 2.54120   2
   5   1  -1 6.94991 2.19437   9
   5   1  -1 6.86366 1.43548   8
   5   1  -1 4.37252 1.41036   4
  -5  -1   1 3.43384 2.75119   1
  -5  -1   1 4.56376 3.37242  13
  -5  -1   1 6.53212 2.59000  11
  -5  -1   1 6.13933 1.07202   8
  -5  -1   1 4.57381 1.61376   9
  -5  -1   1 3.04103 1.44146   4
  -5  -1   1 6.92576 2.02152   2
  -5  -1   1 5.84592 1.25288   6
  -5  -1   1 8.53394 3.28456  12
   4   1  -1 928.135 26.1913   2
   4   1  -1 902.273 24.1845   9
   4   1  -1 956.210 36.4194   1
   4   1  -1 911.773 22.3033   6
   4   1  -1 908.259 22.2291   7
   4   1  -1 892.819 24.5340  11
   4   1  -1 926.438 22.1177   8
   4   1  -1 901.746 23.6732   4
   4   1  -1 926.725 28.9798  12
  -4  -1   1 900.162 21.6351   8
  -4  -1   1 943.196 37.5254  13
  -4  -1   1 880.735 25.0308   2
  -4  -1   1 910.646 24.2232   9
  -4  -1   1 952.334 31.0105  12
  -4  -1   1 931.959 23.9630   4
  -4  -1   1 891.577 35.6022   1
  -4  -1   1 927.368 22.3266   6
  -4  -1   1 914.819 24.5177  11
   3   1  -1 3.22622 0.98594   4
   3   1  -1 2.55182 1.00220  11
   3   1  -1 3.32471 0.84193   7
   3   1  -1 2.06111 1.76411  12
   3   1  -1 3.02545 0.78550   6
   3   1  -1 1.89897 2.04217   1
   3   1  -1 4.26367 1.11287   9
   3   1  -1 4.83852 0.97028   8
   3   1  -1 4.15729 1.63002   2
  -3  -1   1 3.40681 0.81775   6
  -3  -1   1 3.63056 1.06398   9
  -3  -1   1 1.95974 0.95681   2
  -3  -1   1 2.19932 2.14650  13
  -3  -1   1 3.38056 0.78994   8
  -3  -1   1 4.49008 1.21050  11
  -3  -1   1 2.38783 1.56830   1
  -3  -1   1 3.87459 1.10292   4
   2   1  -1 91.6168 3.83130   4
   2   1  -1 89.3335 3.31839   8
   2   1  -1 91.3434 6.35994  12
   2   1  -1 89.5314 4.29628   2
   2   1  -1 87.5541 3.72436   9
   2   1  -1 87.9379 7.57384   1
   2   1  -1 88.7138 3.30821   6
   2   1  -1 90.8561 3.82711  11
  -2  -1   1 89.7439 4.34413  10
  -2  -1   1 90.9602 3.33305   6
  -2  -1   1 88.5956 7.63195   1
  -2  -1   1 88.9569 7.38014  13
  -2  -1   1 88.2510 3.26896   8
  -2  -1   1 87.3742 3.75650  11
  -2  -1   1 91.2217 6.95938  12
  -2  -1   1 91.8204 3.84308   4
  -2  -1   1 91.4720 3.80862   9
  -2  -1   1 87.9493 4.16658   2
   1   1  -1 -0.0734 0.34267  10
   1   1  -1 -0.0221 0.11024   6
   1   1  -1 0.96131 0.89192   1
   1   1  -1 0.09993 0.31488   8
   1   1  -1 0.26443 0.27958  11
   1   1  -1 -0.0866 0.31168   2
   1   1  -1 1.01098 0.98197  12
   1   1  -1 -0.0901 0.14932   4
   1   1  -1 0.43404 0.73233  13
   1   1  -1 0.18056 0.17860   9
  -1  -1   1 0.18311 0.24110  11
  -1  -1   1 -0.0246 0.27605   6
  -1  -1   1 -0.1627 0.13205   2
  -1  -1   1 -0.0352 0.30008   4
  -1  -1   1 0.08186 0.19910  10
  -1  -1   1 0.21330 0.31936   9
  -1  -1   1 0.20527 0.66148   1
  -1  -1   1 0.05179 0.15773   8
  -1  -1   1 -0.3534 0.69426  13
   0   1  -1 33.1152 1.63492   8
   0   1  -1 32.3390 1.30203  10
   0   1  -1 36.3377 3.84757  12
   0   1  -1 32.1769 1.60244   2
   0  -1   1 33.2279 1.53006   6
   0  -1   1 21.7508 3.87517   1
  -1   1  -1 9.46240 0.85110   8
  -1   1  -1 9.04727 0.81521   6
  -1   1  -1 7.85121 0.59505   3
  -1   1  -1 6.76168 0.69879  11
  -1   1  -1 11.2516 2.52821  12
  -1   1  -1 10.8838 2.09927  13
   1  -1   1 9.35365 0.85592  11
  -2   1  -1 434.613 17.0183  12
  -2   1  -1 370.046 12.2653   1
  -2   1  -1 392.752 9.25672   3
  -2   1  -1 388.484 17.2980  13
  -2   1  -1 386.275 10.5860  11
  -2   1  -1 379.372 10.2268   4
  -2   1  -1 359.732 10.9452   7
   2  -1   1 393.148 12.3886   1
   2  -1   1 392.954 10.7258  11
   2  -1   1 390.116 10.3822   7
   2  -1   1 372.002 9.57861   3
   2  -1   1 373.781 10.2003   4
  -3   1  -1 45.8158 2.81448   4
  -3   1  -1 44.0716 4.40546   1
  -3   1  -1 46.7587 3.07627   9
  -3   1  -1 48.7291 2.86573   7
  -3   1  -1 48.6951 6.74097  12
  -3   1  -1 50.6746 6.48029  13
  -3   1  -1 52.2621 3.23727  11
   3  -1   1 49.7142 4.83466   1
   3  -1   1 51.3535 3.33706  11
   3  -1   1 44.4184 2.70860   4
   3  -1   1 49.9918 2.97346   7
   3  -1   1 48.4253 2.70130   3
  -4   1  -1 2767.88 68.2443   2
  -4   1  -1 2861.46 63.6537   7
  -4   1  -1 2787.52 64.7254   4
  -4   1  -1 2866.87 73.7093   1
  -4   1  -1 2797.75 65.7619   9
  -4   1  -1 2929.45 77.2683  12
  -4   1  -1 2860.17 65.8919  11
  -4   1  -1 2806.46 85.5625  13
   4  -1   1 2753.72 64.5172   4
   4  -1   1 2833.58 64.8459   7
   4  -1   1 2855.91 64.3271   3
   4  -1   1 2847.96 73.5159   1
   4  -1   1 2835.76 66.1525  11
  -5   1  -1 3.52526 1.50713   9
  -5   1  -1 9.94224 2.73718   2
  -5   1  -1 11.8824 4.60342  13
  -5   1  -1 8.50755 3.22457   1
  -5   1  -1 6.39294 1.02887   6
  -5   1  -1 7.50423 1.37862   7
  -5   1  -1 6.23201 3.16050  12
  -5   1  -1 8.44072 1.84862   4
   5  -1   1 7.56496 1.70385   4
   5  -1   1 7.78635 2.21713  11
   5  -1   1 8.71141 3.40224   1
   5  -1   1 7.84291 1.68014   7
   5  -1   1 9.08028 1.87582   3
  -6   1  -1 117.187 8.30565  12
  -6   1  -1 138.691 8.14540   2
  -6   1  -1 125.302 4.52956   6
  -6   1  -1 124.997 5.10624   7
  -6   1  -1 122.593 7.09065  11
  -6   1  -1 119.315 11.2697   1
  -6   1  -1 123.758 7.09117   9
  -6   1  -1 117.305 6.28957   4
  -6   1  -1 111.315 14.3712  13
   6  -1   1 123.702 6.27611   4
   6  -1   1 126.039 11.3634   1
   6  -1   1 119.647 7.38725  11
   6  -1   1 135.882 6.49596   3
   6  -1   1 122.443 6.08565   7
  -7   1  -1 11.1561 1.44694   6
  -7   1  -1 10.0275 1.71881   7
  -7   1  -1 10.0809 2.27113   4
  -7   1  -1 5.46593 4.12254   1
  -7   1  -1 11.1141 3.08260   2
  -7   1  -1 5.97503 2.23521   9
  -7   1  -1 9.37153 2.38147  11
   7  -1   1 10.6453 2.61091   3
   7  -1   1 7.72881 2.45288  11
   7  -1   1 8.84937 4.58173   1
   7  -1   1 10.3282 2.50899   4
   7  -1   1 5.96585 1.87830   7
  -8   1  -1 68.0370 5.99459   2
  -8   1  -1 53.6140 5.40379  11
  -8   1  -1 58.6887 3.63584   7
  -8   1  -1 54.6933 5.57122   9
  -8   1  -1 40.3783 8.90841   1
  -8   1  -1 55.8069 4.97631   4
  -8   1  -1 53.2211 3.11582   6
   8  -1   1 44.9879 9.31668   1
   8  -1   1 48.0589 4.83661   3
   8  -1   1 57.1267 4.84651   4
   8  -1   1 53.8161 4.17009   7
   8  -1   1 54.3579 5.91890  11
  -9   1  -1 40.0467 5.18860   2
  -9   1  -1 30.6009 5.21673  11
  -9   1  -1 32.8055 2.61453   6
  -9   1  -1 35.0042 4.48047   4
  -9   1  -1 29.5906 5.19648   9
  -9   1  -1 25.7750 8.48748   1
   9  -1   1 24.2442 3.14617   7
   9  -1   1 35.1892 4.72486   3
   9  -1   1 29.0985 8.63178   1
   9  -1   1 30.7943 4.10147   4
   9  -1   1 29.8722 5.50714  11
 -10   1  -1 26.6405 2.83291   7
 -10   1  -1 26.4523 2.50941   6
 -10   1  -1 24.7487 4.64648   2
 -10   1  -1 28.6302 4.82317   4
 -10   1  -1 20.9119 5.76298  11
 -10   1  -1 11.5020 7.46146   1
 -10   1  -1 19.4766 4.78830   9
  10  -1   1 36.7460 5.91240   3
  10  -1   1 24.3940 6.42345   4
  10  -1   1 27.3039 5.51609  11
  10  -1   1 18.4760 7.85316   1
  10  -1   1 28.7333 3.22236   7
 -11   1  -1 10.8400 1.89255   6
 -11   1  -1 9.11988 3.54543   9
 -11   1  -1 14.8971 4.25029   2
 -11   1  -1 11.5742 3.38719   4
  11  -1   1 16.4836 4.91156  11
  11  -1   1 16.7565 3.74358   4
  11  -1   1 15.8141 3.98545   3
 -12   1  -1 622.476 24.3390   2
 -12   1  -1 662.240 26.5949   9
 -12   1  -1 685.280 24.6822   4
  12  -1   1 699.516 25.5706   3
 -13   1  -1 3.98220 3.35169   4
 -13   1  -1 1.55549 2.70077   9
  13  -1   1 1.47159 3.54670   3
 -14   1  -1 3.48399 3.67201   9
 -14   1  -1 0.62685 3.19388   5
 -14   1  -1 1.86591 2.93136   4
  14  -1   1 5.39052 4.27273   3
 -15   1  -1 3.92289 4.10019   5
 -15   1  -1 0.89239 3.66339   4
 -15   1  -1 0.76288 3.31915   9
 -16   1  -1 91.0560 10.1334   4
 -16   1  -1 99.7778 11.9487   5
 -16   1  -1 97.6624 11.2590   9
  16  -1   1 108.559 9.74492   3
  16   0  -1 11.9105 6.23817   3
 -16   0   1 -4.3981 3.82011   4
 -16   0   1 2.45170 3.83040   5
 -16   0   1 9.13836 5.23033   9
  15   0  -1 1.00656 5.07432   3
 -15   0   1 10.6709 4.91305   5
 -15   0   1 13.1199 4.94815   9
 -15   0   1 -3.0064 3.08822   4
  14   0  -1 11.3407 5.82700   3
 -14   0   1 22.4681 6.05555   5
 -14   0   1 18.9399 5.73295   9
 -14   0   1 18.9895 5.21399   4
  13   0  -1 94.0249 10.6716   3
 -13   0   1 91.7755 8.39439   4
 -13   0   1 81.8163 5.01897   6
 -13   0   1 93.2359 18.6551   5
 -13   0   1 90.7107 12.5007   9
  12   0  -1 4.09378 3.35797   3
 -12   0   1 4.47176 2.71526   4
 -12   0   1 -1.6738 2.45319   9
 -12   0   1 -4.7011 3.43268   2
 -12   0   1 2.90555 1.68646   6
  11   0  -1 35.9921 5.17107   4
  11   0  -1 50.1177 6.57692   3
 -11   0   1 31.4521 7.58791   2
 -11   0   1 39.3150 5.34165   4
 -11   0   1 43.7005 6.52642   9
 -11   0   1 34.9464 3.24180   6
  10   0  -1 0.40012 5.51276   1
  10   0  -1 5.99974 3.17558  11
  10   0  -1 1.11642 2.07812   4
  10   0  -1 6.19508 3.23976   3
 -10   0   1 4.11085 2.96535   2
 -10   0   1 -9.5685 5.09107   1
 -10   0   1 3.70752 2.62155   9
 -10   0   1 4.13259 2.03564   4
 -10   0   1 6.12084 1.67598   6
   9   0  -1 1482.08 43.8231   9
   9   0  -1 1528.26 64.2412   1
   9   0  -1 1572.63 38.2032   7
   9   0  -1 1575.70 45.7762  11
   9   0  -1 1609.52 43.5278   3
   9   0  -1 1549.36 41.9805   4
  -9   0   1 1470.38 44.1295  11
  -9   0   1 1624.39 42.7155   4
  -9   0   1 1636.86 37.6830   6
  -9   0   1 1569.05 45.9947   2
  -9   0   1 1496.32 64.3364   1
  -9   0   1 1603.92 44.6051   9
   8   0  -1 16.6787 3.99012  11
   8   0  -1 15.7152 7.30660   1
   8   0  -1 29.6706 4.13930   9
   8   0  -1 26.3259 4.06637   4
   8   0  -1 25.3694 2.61980   7
   8   0  -1 26.2965 4.80447   3
  -8   0   1 9.57511 6.49701   1
  -8   0   1 20.4937 2.32119   6
  -8   0   1 22.8163 4.17336   9
  -8   0   1 19.8600 4.85393   2
  -8   0   1 20.3621 3.72929   4
   7   0  -1 92.0511 5.82799   4
   7   0  -1 82.4111 6.75269  11
   7   0  -1 91.8391 6.27336   3
   7   0  -1 85.6962 6.24000   9
   7   0  -1 80.6939 11.6663   1
  -7   0   1 95.0258 6.09595   4
  -7   0   1 88.3281 12.1129   1
  -7   0   1 85.0680 6.43705  11
  -7   0   1 91.6307 4.21951   6
  -7   0   1 102.805 7.55146   2
  -7   0   1 90.7711 6.53560   9
   6   0  -1 31.1485 3.45006   9
   6   0  -1 28.9560 3.01662   4
   6   0  -1 32.1171 3.47263   3
   6   0  -1 29.0168 2.23771   7
   6   0  -1 35.3816 8.38531   1
   6   0  -1 34.1607 4.08678  11
  -6   0   1 27.6178 2.15473   6
  -6   0   1 29.7562 8.35786  13
  -6   0   1 25.4319 5.63967   2
  -6   0   1 26.4487 1.77019   8
  -6   0   1 23.9501 3.00200   4
  -6   0   1 20.5910 3.11178   9
  -6   0   1 24.5152 3.29428  11
  -6   0   1 26.7791 6.96016   1
   5   0  -1 31.7613 2.11215   7
   5   0  -1 32.9151 2.14518   8
   5   0  -1 34.2986 3.80021  11
   5   0  -1 31.6111 3.16254   3
   5   0  -1 33.3715 2.95471   4
   5   0  -1 42.3692 8.53533   1
   5   0  -1 33.6527 3.31919   9
   5   0  -1 31.6733 2.10200   6
  -5   0   1 32.4355 2.15885   6
  -5   0   1 36.2433 3.65374  11
  -5   0   1 31.2077 3.32423   9
  -5   0   1 30.6183 1.90876   8
  -5   0   1 34.2955 3.11939   4
  -5   0   1 34.6636 7.97310  13
  -5   0   1 28.1979 3.89106   2
   4   0  -1 4.66968 2.38532   2
   4   0  -1 2.93308 1.29892  11
   4   0  -1 3.50931 0.81019   7
   4   0  -1 3.07906 1.22282   9
   4   0  -1 4.78587 1.14385   8
   4   0  -1 5.41483 2.90917   1
   4   0  -1 4.11924 1.24252   4
   4   0  -1 2.36522 1.22343   3
   4   0  -1 2.68750 0.73825   6
  -4   0   1 2.95238 2.44741   1
  -4   0   1 7.36382 2.91881  13
  -4   0   1 2.01736 1.46943   2
  -4   0   1 5.22871 1.00644   8
  -4   0   1 3.91494 0.85588   6
  -4   0   1 3.64102 1.29549  11
  -4   0   1 2.24912 0.98945   4
  -4   0   1 3.43015 1.24680   9
   3   0  -1 88.6260 9.65927   1
   3   0  -1 90.1162 4.52822   9
   3   0  -1 95.2387 3.88278   8
   3   0  -1 86.3506 4.01638   4
   3   0  -1 90.4775 3.09033   7
   3   0  -1 92.8775 6.09466   2
   3   0  -1 91.4746 4.80191  11
   3   0  -1 93.0910 3.30865   6
  -3   0   1 93.8941 3.60474   8
  -3   0   1 91.5109 8.83107  13
  -3   0   1 95.7574 8.85715   1
  -3   0   1 93.9068 4.21597   4
  -3   0   1 92.5647 4.75778  11
  -3   0   1 90.6906 4.53099   9
  -3   0   1 94.7940 3.29154   6
  -3   0   1 94.3675 5.66049   2
   2   0  -1 4.75554 2.03443   1
   2   0  -1 3.09866 0.84736   8
   2   0  -1 3.07127 0.74497   4
   2   0  -1 3.31890 0.57875   6
   2   0  -1 2.71763 0.92412  11
   2   0  -1 3.98502 1.33405  12
   2   0  -1 3.25643 0.55008   7
   2   0  -1 4.46882 1.58920   2
   2   0  -1 1.90282 1.07818  12
   2   0  -1 2.78251 0.83925   9
  -2   0   1 3.22088 0.58429   6
  -2   0   1 3.83975 1.09701  11
  -2   0   1 0.47429 1.00050   1
  -2   0   1 4.87942 0.99547   4
  -2   0   1 4.06133 0.93956   8
  -2   0   1 2.21461 0.92496  12
  -2   0   1 1.24964 1.72308  13
  -2   0   1 3.22519 0.88706   9
  -2   0   1 4.13819 1.45728   2
   1   0  -1 2894.47 66.1767   2
   1   0  -1 2978.66 70.8837   1
   1   0  -1 2720.19 63.6723   6
   1   0  -1 2842.83 64.6658   3
   1   0  -1 2810.99 64.5989   8
   1   0  -1 3051.94 68.3698  12
  -1   0   1 3014.78 64.2676   4
  -1   0   1 2895.70 64.5319   9
  -1   0   1 2870.37 64.4316   5
  -1   0   1 3079.05 71.1171  13
  -1   0   1 2952.90 63.8448   6
  -1   0  -1 719.300 16.3408   8
  -1   0  -1 719.050 16.4212   4
  -1   0  -1 594.718 18.2885   7
  -1   0  -1 766.037 15.4436   3
  -1   0  -1 738.386 22.0246  13
   1   0   1 611.653 17.6992  10
  -2   0  -1 16.4401 3.35393  12
  -2   0  -1 18.9385 1.42377   7
  -2   0  -1 12.2059 2.12128   1
  -2   0  -1 16.0555 1.36609   4
  -2   0  -1 16.9520 1.29098   2
  -2   0  -1 13.5967 3.35373  13
  -2   0  -1 16.4705 1.37014  11
   2   0   1 17.2097 1.43978   7
   2   0   1 14.7435 4.30838  12
   2   0   1 10.2937 2.33652   1
   2   0   1 15.5072 1.44968  11
   2   0   1 16.7513 1.33125   4
  -3   0  -1 270.957 8.42321   2
  -3   0  -1 281.549 16.0309  13
  -3   0  -1 258.326 8.51716  11
  -3   0  -1 268.255 7.71549   7
  -3   0  -1 252.944 8.16502   4
  -3   0  -1 292.897 12.9933  12
  -3   0  -1 257.019 8.52360   9
  -3   0  -1 265.135 12.9944   1
   3   0   1 263.058 7.94330   7
   3   0   1 269.059 8.22139   4
   3   0   1 277.316 13.2901   1
  -4   0  -1 6.40116 1.51677   4
  -4   0  -1 5.41000 1.45926   9
  -4   0  -1 6.71687 1.67981  11
  -4   0  -1 9.28787 2.69370  12
  -4   0  -1 7.75623 1.81218   2
  -4   0  -1 7.95683 1.25735   7
  -4   0  -1 8.84451 3.29896  13
   4   0   1 7.65660 1.48169   4
   4   0   1 3.64622 2.23430   1
   4   0   1 8.26417 1.84773  11
   4   0   1 8.17524 1.48467   7
  -5   0  -1 410.525 13.6377   9
  -5   0  -1 398.789 13.6116  11
  -5   0  -1 408.120 17.2717  12
  -5   0  -1 425.981 11.7766   7
  -5   0  -1 426.094 25.8544  13
  -5   0  -1 417.533 13.6042   2
  -5   0  -1 417.628 11.1722   6
  -5   0  -1 405.191 21.2199   1
  -5   0  -1 410.417 13.0311   4
   5   0   1 418.905 12.2480   7
   5   0   1 429.976 14.1959  11
   5   0   1 402.749 20.9364   1
   5   0   1 411.780 12.8516   4
  -6   0  -1 4.95143 1.25231   7
  -6   0  -1 6.64152 2.13617  11
  -6   0  -1 4.14984 1.79400   9
  -6   0  -1 8.39931 2.02337   4
  -6   0  -1 10.5244 3.81231   1
  -6   0  -1 9.23048 2.36387   2
  -6   0  -1 6.96746 1.25346   6
  -6   0  -1 6.27105 3.25185  12
  -6   0  -1 2.79702 4.64969  13
   6   0   1 7.96369 1.83096   7
   6   0   1 5.55621 3.44164   1
   6   0   1 7.10038 2.19836  11
   6   0   1 7.58089 1.92148   4
  -7   0  -1 145.875 17.6039  13
  -7   0  -1 157.369 6.39631   7
  -7   0  -1 166.686 8.30334   2
  -7   0  -1 140.729 10.1577  12
  -7   0  -1 137.862 13.9639   1
  -7   0  -1 164.422 6.05516   6
  -7   0  -1 153.564 8.43069   9
  -7   0  -1 164.377 8.07764   4
  -7   0  -1 153.289 8.45902  11
   7   0   1 158.101 7.73128   4
   7   0   1 168.328 7.33742   7
   7   0   1 156.583 8.92783  11
   7   0   1 141.215 14.2595   1
  -8   0  -1 109.132 7.39380  11
  -8   0  -1 108.085 7.56842   9
  -8   0  -1 106.969 13.2547   1
  -8   0  -1 107.101 6.88863   4
  -8   0  -1 96.7335 7.04434   2
  -8   0  -1 106.239 5.31790   7
  -8   0  -1 110.405 4.94715   6
   8   0   1 106.858 6.35275   3
   8   0   1 108.947 9.42298  11
   8   0   1 100.970 6.02661   7
   8   0   1 102.579 6.53490   4
   8   0   1 103.820 13.1515   1
  -9   0  -1 1001.86 47.1604   1
  -9   0  -1 1047.17 26.8528   7
  -9   0  -1 1037.17 31.8843   9
  -9   0  -1 1019.47 30.7975   2
  -9   0  -1 999.419 33.7410  10
  -9   0  -1 1033.37 26.0818   6
  -9   0  -1 1025.83 30.3780   4
  -9   0  -1 1001.65 34.7563  11
   9   0   1 1017.97 47.3195   1
   9   0   1 1074.92 29.5463   3
   9   0   1 1062.91 33.1270  11
   9   0   1 1052.16 28.7175   7
   9   0   1 1011.32 29.7749   4
 -10   0  -1 9.13671 2.13792   7
 -10   0  -1 7.58930 3.18585  10
 -10   0  -1 10.6450 2.11383   6
 -10   0  -1 11.6662 3.83469  11
 -10   0  -1 8.48984 3.18935   9
 -10   0  -1 7.02023 5.89736   1
 -10   0  -1 9.53358 2.78557   2
 -10   0  -1 7.44102 2.95532   4
  10   0   1 0.84913 5.14821   1
  10   0   1 13.6746 4.14025  11
  10   0   1 8.22072 2.67478   7
  10   0   1 13.3038 3.31363   3
 -11   0  -1 1.02586 2.20314   9
 -11   0  -1 6.75613 2.91719   2
 -11   0  -1 1.94774 1.52244   6
 -11   0  -1 -0.8799 1.78575   4
  11   0   1 2.18406 2.36823  11
  11   0   1 -2.4587 1.83789   3
  11   0   1 3.43792 2.79755   4
 -12   0  -1 37.6464 5.63691   4
 -12   0  -1 32.9203 6.46301   9
 -12   0  -1 32.1429 5.71504   2
 -12   0  -1 45.1175 3.74141   6
  12   0   1 41.9594 4.78184   7
  12   0   1 38.7973 6.04218   3
  12   0   1 29.6411 6.28853  11
 -13   0  -1 105.860 9.13573   4
 -13   0  -1 113.800 10.4573   9
 -13   0  -1 105.895 5.63970   6
 -13   0  -1 101.203 8.75748   2
  13   0   1 109.728 9.93409   3
  13   0   1 122.174 11.5317  11
  13   0   1 91.2359 6.11481   7
 -14   0  -1 5.32250 3.52205   9
 -14   0  -1 2.87539 2.69525   4
 -14   0  -1 1.29129 1.58548   6
  14   0   1 -6.0443 3.68078   3
 -15   0  -1 5.62087 4.73395   9
 -15   0  -1 6.77024 3.42066   4
  15   0   1 11.8080 5.02664   3
 -16   0  -1 34.3525 8.10619   5
 -16   0  -1 38.4312 7.90781   9
 -16   0  -1 31.9184 6.80336   4
  16   0   1 31.9386 7.41763   3
  15  -1  -1 6.61748 5.73210   3
 -15   1   1 1.32147 3.64813   4
 -15   1   1 3.63583 4.35904   9
 -15   1   1 12.4623 4.97835   5
  14  -1  -1 6.94506 4.49483   3
 -14   1   1 11.4645 5.12342   5
 -14   1   1 1.79234 3.93153   9
 -14   1   1 7.73039 3.55749   4
  13  -1  -1 1.08920 3.86965   3
 -13   1   1 5.39067 3.73964   5
 -13   1   1 2.80699 2.85813   9
 -13   1   1 4.06556 3.63744   4
  12  -1  -1 13.6685 4.97339   3
 -12   1   1 9.27606 3.65400   4
 -12   1   1 7.58539 4.07200   5
 -12   1   1 4.09005 3.72072   9
  11  -1  -1 25.3898 5.96062   3
  11  -1  -1 17.3015 4.25117   4
 -11   1   1 17.3684 5.14073   5
 -11   1   1 16.5327 5.04329   2
 -11   1   1 15.8674 4.78249   9
 -11   1   1 18.8713 4.24473   4
  10  -1  -1 27.9724 6.16514   3
 -10   1   1 23.5418 5.39909   2
 -10   1   1 30.5705 4.28426   4
 -10   1   1 33.4875 5.95871   9
 -10   1   1 35.2314 2.71079   6
   9  -1  -1 96.2358 8.39018   3
   9  -1  -1 74.0636 15.0299   1
   9  -1  -1 102.126 6.95622   4
   9  -1  -1 93.6919 7.76916   9
  -9   1   1 85.6059 8.41958   2
  -9   1   1 94.3770 7.75483  11
  -9   1   1 96.9906 4.30470   6
  -9   1   1 96.2093 7.97670   9
  -9   1   1 97.0033 6.99900   4
  -9   1   1 78.6910 17.4579   1
   8  -1  -1 2238.05 56.0397   4
   8  -1  -1 2333.92 59.4267   3
   8  -1  -1 2186.48 58.3856   9
   8  -1  -1 2201.18 77.9472   1
  -8   1   1 2202.47 78.2477   1
  -8   1   1 2312.33 51.4751   6
  -8   1   1 2236.49 59.3602  11
  -8   1   1 2272.21 58.8692   9
  -8   1   1 2302.10 56.6065   4
  -8   1   1 2323.72 62.7935   2
   7  -1  -1 50.4392 11.1967   1
   7  -1  -1 50.3958 4.94078   9
   7  -1  -1 58.7155 5.58106   3
   7  -1  -1 57.2994 4.47484   4
  -7   1   1 49.8108 5.31207   9
  -7   1   1 64.6163 6.63946   2
  -7   1   1 55.5180 4.60489   4
  -7   1   1 51.8643 2.83212   6
  -7   1   1 54.0434 5.37709  11
  -7   1   1 40.0626 8.69602   1
   6  -1  -1 113.150 7.60705  11
   6  -1  -1 100.495 5.64384   4
   6  -1  -1 100.433 6.47915   9
   6  -1  -1 112.046 6.98597   3
   6  -1  -1 119.886 12.8359   1
  -6   1   1 112.401 6.00095   4
  -6   1   1 117.353 4.60705   8
  -6   1   1 96.4740 8.22227   2
  -6   1   1 104.883 6.74881   9
  -6   1   1 114.066 12.3660   1
  -6   1   1 86.7231 13.1495  13
  -6   1   1 106.240 3.95393   6
  -6   1   1 104.869 6.90749  11
   5  -1  -1 0.24275 0.82726   4
   5  -1  -1 5.06959 2.88492   1
   5  -1  -1 -0.4865 0.88408   9
   5  -1  -1 1.75310 1.45260  11
   5  -1  -1 -1.2799 0.87033   3
  -5   1   1 2.70698 0.94909   8
  -5   1   1 -0.1517 1.06050  11
  -5   1   1 1.10909 0.57135   6
  -5   1   1 4.99097 3.21918   1
  -5   1   1 4.06753 1.86492   2
  -5   1   1 -1.3890 3.78528  13
  -5   1   1 0.89739 1.14612   9
  -5   1   1 -0.4042 0.74663   4
   4  -1  -1 22.3509 2.12927   4
   4  -1  -1 24.6159 2.85799   3
   4  -1  -1 37.2128 7.31760   1
   4  -1  -1 21.0604 1.34838   6
   4  -1  -1 27.6148 2.79586   9
  -4   1   1 26.5046 6.17037   1
  -4   1   1 21.4451 2.20317   8
  -4   1   1 23.8853 2.28660   4
  -4   1   1 27.1160 2.92029   9
  -4   1   1 25.4100 2.91829  11
  -4   1   1 22.3134 4.25447   2
  -4   1   1 17.7406 5.37654  13
  -4   1   1 23.3627 1.43098   6
   3  -1  -1 15.3072 1.95253   9
   3  -1  -1 16.3253 1.01379   6
   3  -1  -1 16.6762 1.64682   4
   3  -1  -1 15.7740 4.02662   1
   3  -1  -1 18.6304 2.45011   3
  -3   1   1 18.6331 2.22817  11
  -3   1   1 16.7749 1.77148   8
  -3   1   1 11.8927 4.34620  13
  -3   1   1 18.4581 4.53816   1
  -3   1   1 18.4219 1.78300   4
  -3   1   1 17.4986 1.07437   6
  -3   1   1 15.8103 2.02516   9
  -3   1   1 17.4603 3.65048   2
   2  -1  -1 189.247 5.86590   8
   2  -1  -1 168.888 6.50614  12
   2  -1  -1 186.726 7.52594   3
   2  -1  -1 183.552 5.63250   4
   2  -1  -1 185.541 6.47373   9
   2  -1  -1 185.836 11.0146   1
  -2   1   1 200.373 11.1730   1
  -2   1   1 183.752 6.84459   3
  -2   1   1 180.805 6.80289  11
  -2   1   1 189.998 6.01844   8
  -2   1   1 192.854 6.78753   5
  -2   1   1 188.515 5.70017   4
  -2   1   1 207.273 12.9052  13
  -2   1   1 188.187 6.50941   9
   1  -1  -1 6.49490 0.90518   9
   1  -1  -1 5.95921 0.96866   8
   1  -1  -1 4.92882 1.44091  12
   1  -1  -1 6.87349 0.66747   4
   1  -1  -1 8.40157 1.68574   3
   1  -1  -1 5.95918 0.91126   5
   1  -1  -1 8.54634 2.67899   1
  -1   1   1 6.30912 0.91878   9
  -1   1   1 6.72392 0.80616   4
  -1   1   1 7.57710 1.61466  12
  -1   1   1 7.46617 0.94589   8
  -1   1   1 8.56689 1.63629   3
  -1   1   1 7.20500 1.05181   5
  -1   1   1 5.52946 1.89607  13
  -1  -1  -1 0.82951 0.32548   4
  -1  -1  -1 0.84344 0.33967   3
  -1  -1  -1 -0.1310 0.13169  10
  -1  -1  -1 -1.0497 0.80984  12
  -1  -1  -1 0.32138 0.33596   7
  -1  -1  -1 0.53056 0.66643   1
   1   1   1 0.29004 0.33664   5
   1   1   1 0.14714 0.12720   4
   1   1   1 0.68990 0.41059  10
   1   1   1 1.13815 0.41715  11
   1   1   1 -0.0373 0.43038   1
  -2  -1  -1 195.356 6.01112   7
  -2  -1  -1 220.471 11.1232  12
  -2  -1  -1 201.484 5.50556   2
  -2  -1  -1 210.161 11.2314  13
  -2  -1  -1 195.319 6.03807   4
   2   1   1 188.387 10.3776   1
   2   1   1 201.540 6.02955   7
   2   1   1 205.768 6.28048  11
   2   1   1 204.047 6.56054  10
   2   1   1 197.338 5.55574   2
  -3  -1  -1 1.16010 0.67092   4
  -3  -1  -1 3.24133 1.76705   1
  -3  -1  -1 2.94468 0.92851   9
  -3  -1  -1 2.21990 0.76986   7
  -3  -1  -1 2.36624 1.75117  12
  -3  -1  -1 1.55163 0.90134  10
  -3  -1  -1 2.07376 0.83793  11
  -3  -1  -1 0.73789 1.88560  13
  -3  -1  -1 3.65979 0.84968   2
   3   1   1 1.47696 0.70522   7
   3   1   1 2.62189 1.84119   1
   3   1   1 2.42956 0.90357  11
   3   1   1 1.76422 0.77495   4
   3   1   1 2.95221 0.90651   2
   3   1   1 3.07377 1.13164  10
  -4  -1  -1 407.012 11.5352   2
  -4  -1  -1 382.967 21.7105  13
  -4  -1  -1 409.671 20.3164   1
  -4  -1  -1 382.621 10.8636   6
  -4  -1  -1 399.232 11.3594   7
  -4  -1  -1 393.983 12.2608   9
  -4  -1  -1 427.407 18.7989  12
  -4  -1  -1 409.490 12.4656  11
  -4  -1  -1 406.859 13.2117  10
   4   1   1 405.213 11.4070   7
   4   1   1 409.490 12.3135   2
   4   1   1 388.337 11.8665   4
   4   1   1 409.080 20.2663   1
  -5  -1  -1 32.0685 2.97013   4
  -5  -1  -1 28.7900 2.94545   9
  -5  -1  -1 37.7095 5.60494  12
  -5  -1  -1 30.1737 6.78197   1
  -5  -1  -1 30.6655 2.51227   7
  -5  -1  -1 28.6553 2.68315   2
  -5  -1  -1 25.7337 2.86646  11
  -5  -1  -1 32.9205 3.50819  10
  -5  -1  -1 31.1710 2.24496   6
   5   1   1 30.5200 3.15320  11
   5   1   1 29.3763 6.50130   1
   5   1   1 35.2924 3.33999   2
   5   1   1 29.8180 2.49731   7
   5   1   1 31.2843 2.80070   4
  -6  -1  -1 358.152 11.1514   7
  -6  -1  -1 356.642 22.1336   1
  -6  -1  -1 355.601 12.0625   2
  -6  -1  -1 361.750 12.5284   4
  -6  -1  -1 338.981 12.7465   9
  -6  -1  -1 355.397 10.6258   6
  -6  -1  -1 359.148 13.0525  11
  -6  -1  -1 336.510 24.6609  13
  -6  -1  -1 336.237 13.8047  10
  -6  -1  -1 347.050 18.0773  12
   6   1   1 348.306 13.1780  11
   6   1   1 358.546 12.2857   4
   6   1   1 367.157 14.1250   2
   6   1   1 357.416 11.2106   7
   6   1   1 366.120 22.1317   1
  -7  -1  -1 14.0933 2.73922   4
  -7  -1  -1 16.8535 8.29708  13
  -7  -1  -1 24.3835 2.54473   7
  -7  -1  -1 21.2469 2.87050   2
  -7  -1  -1 22.7673 3.30241   9
  -7  -1  -1 25.9077 4.63291  10
  -7  -1  -1 15.6279 2.06460   6
  -7  -1  -1 13.6835 5.66990   1
  -7  -1  -1 12.4685 5.15200  12
  -7  -1  -1 20.6057 3.65229  11
   7   1   1 19.2826 4.99714  12
   7   1   1 26.2228 3.67969  11
   7   1   1 23.8094 2.90505   4
   7   1   1 18.9011 6.10522   1
   7   1   1 20.2315 2.55545   7
   7   1   1 21.5524 4.48203   2
  -8  -1  -1 720.944 22.1978   4
  -8  -1  -1 678.949 28.6803   2
  -8  -1  -1 721.678 19.1902   6
  -8  -1  -1 711.402 23.0313  11
  -8  -1  -1 723.967 19.7473   7
  -8  -1  -1 724.807 37.1387   1
  -8  -1  -1 663.598 24.1816  10
  -8  -1  -1 651.346 25.4502   9
   8   1   1 711.643 24.6058  11
   8   1   1 718.911 20.2012   7
   8   1   1 627.810 35.0514   1
   8   1   1 681.953 21.4021   4
  -9  -1  -1 46.9167 10.8968   1
  -9  -1  -1 69.0235 4.35327   6
  -9  -1  -1 48.4768 5.62192  11
  -9  -1  -1 68.7050 5.92745   4
  -9  -1  -1 61.2187 5.39434   2
  -9  -1  -1 60.2305 4.51179   7
  -9  -1  -1 61.4906 6.72128  10
  -9  -1  -1 65.1487 6.31801   9
   9   1   1 60.0642 6.60182  11
   9   1   1 72.4703 12.4457   1
   9   1   1 68.1384 4.99190   7
   9   1   1 47.4111 5.01584   4
 -10  -1  -1 73.9475 7.05564   9
 -10  -1  -1 64.4907 4.82447   7
 -10  -1  -1 71.2946 4.63792   6
 -10  -1  -1 72.4218 6.71100  11
 -10  -1  -1 63.0803 7.25182  10
 -10  -1  -1 48.0977 12.3154   1
 -10  -1  -1 71.0096 6.12203   2
 -10  -1  -1 69.4598 6.37673   4
  10   1   1 85.3666 6.29058   3
  10   1   1 75.3967 11.2691   7
  10   1   1 75.2939 7.50871  11
  10   1   1 50.8951 12.5703   1
 -11  -1  -1 3.40869 2.30386   9
 -11  -1  -1 5.87775 2.69294   4
 -11  -1  -1 3.89982 1.59448   6
 -11  -1  -1 2.79162 2.22910   2
  11   1   1 7.21534 2.73398   4
  11   1   1 4.49394 3.42638  11
  11   1   1 9.88929 3.08425   7
  11   1   1 4.52483 2.82611   3
 -12  -1  -1 6.52338 3.33049   9
 -12  -1  -1 4.23692 1.90170   6
 -12  -1  -1 -1.1515 1.86624   4
 -12  -1  -1 6.38460 2.79185   2
  12   1   1 -2.9225 2.61596   7
  12   1   1 10.0115 5.22780   3
  12   1   1 2.93808 3.18355  11
 -13  -1  -1 16.3853 3.99336   4
 -13  -1  -1 0.53601 5.51228   2
 -13  -1  -1 12.9671 2.82134   6
 -13  -1  -1 5.90152 3.46096   9
  13   1   1 16.4432 4.58364   3
  13   1   1 8.82043 3.43285   7
  13   1   1 3.62171 3.07796  11
 -14  -1  -1 7.63683 4.62205   9
 -14  -1  -1 12.5615 4.58894   2
 -14  -1  -1 8.77714 3.36616   4
 -14  -1  -1 6.64525 2.31088   6
  14   1   1 1.55127 4.11150   3
  14   1   1 4.14752 4.17953  11
  14   1   1 4.45993 3.62805   7
 -15  -1  -1 13.0466 2.79637   6
 -15  -1  -1 13.6875 5.16100   9
 -15  -1  -1 15.1097 4.75037   4
  15   1   1 13.3788 5.47407   3
 -16  -1  -1 30.6575 7.96299   9
 -16  -1  -1 28.0242 6.09700   4
 -16  -1  -1 22.5319 3.58966   6
  16   1   1 20.5509 6.96281   3
  15  -2  -1 43.0915 8.47888   3
 -15   2   1 61.9442 8.65424   4
 -15   2   1 60.0171 10.1278   9
 -15   2   1 74.6428 10.0991   5
  14  -2  -1 41.5291 7.41001   3
 -14   2   1 25.4882 6.39228   5
 -14   2   1 36.4072 6.91433   9
 -14   2   1 28.3852 5.82235   4
  13  -2  -1 41.4310 7.27632   3
 -13   2   1 36.7027 6.48678   4
 -13   2   1 26.8267 6.15900   9
 -13   2   1 30.0835 6.97921   5
  12  -2  -1 36.2818 6.91066   3
 -12   2   1 30.0983 6.50541   5
 -12   2   1 27.5812 6.29278   9
 -12   2   1 33.0723 5.96710   4
  11  -2  -1 340.693 16.9539   3
  11  -2  -1 269.684 13.3989   4
 -11   2   1 281.194 13.8632   4
 -11   2   1 324.893 16.7329   9
 -11   2   1 269.684 16.9789   2
 -11   2   1 298.610 16.4940   5
  10  -2  -1 1.53808 2.86255   3
  10  -2  -1 -2.2256 1.90437   4
 -10   2   1 3.00244 2.36092   9
 -10   2   1 14.3982 7.31995   2
 -10   2   1 0.95261 1.77742   4
 -10   2   1 0.94487 2.24519   5
   9  -2  -1 31.0200 9.62113   1
   9  -2  -1 8.89349 2.62097   4
   9  -2  -1 14.9032 4.66786   3
  -9   2   1 15.1099 4.14419   2
  -9   2   1 13.9069 3.35516   4
  -9   2   1 13.3813 5.60006   1
  -9   2   1 10.1072 3.66062   9
  -9   2   1 14.9337 4.32872  11
  -9   2   1 10.1152 3.29055   5
   8  -2  -1 6.20384 5.35449   1
   8  -2  -1 1.41672 2.40414   9
   8  -2  -1 -0.3378 1.84767   4
   8  -2  -1 1.16179 2.59027   3
  -8   2   1 4.81524 2.76968   2
  -8   2   1 -1.7375 1.63729   9
  -8   2   1 3.09133 1.64038   4
  -8   2   1 -0.4178 1.44215   5
  -8   2   1 6.17561 5.29854   1
  -8   2   1 -0.5157 1.58549  11
   7  -2  -1 428.497 16.5069   9
   7  -2  -1 423.962 26.5500   1
   7  -2  -1 419.644 14.5752   4
   7  -2  -1 444.284 17.8684   3
  -7   2   1 428.779 20.0781   2
  -7   2   1 432.137 17.1065  11
  -7   2   1 434.635 17.3043   9
  -7   2   1 427.638 13.1200   8
  -7   2   1 443.180 26.6372   1
  -7   2   1 443.350 14.8863   4
  -7   2   1 431.281 16.9427   5
   6  -2  -1 51.5957 5.35488   3
   6  -2  -1 47.7645 9.85193   1
   6  -2  -1 47.5922 4.47484   4
   6  -2  -1 42.2533 4.25708   9
  -6   2   1 47.8522 3.76649   8
  -6   2   1 49.8022 4.90733  11
  -6   2   1 39.7997 6.25309   2
  -6   2   1 47.4494 4.83906   5
  -6   2   1 37.1555 8.12023   1
  -6   2   1 44.5316 4.44413   9
  -6   2   1 49.3373 12.0182  13
  -6   2   1 43.8866 3.67157   4
   5  -2  -1 621.556 17.9727   4
   5  -2  -1 649.343 20.0485   9
   5  -2  -1 664.201 30.0360   1
   5  -2  -1 627.949 21.4091   3
  -5   2   1 665.464 18.0498   8
  -5   2   1 677.685 37.8385  13
  -5   2   1 662.361 20.1341   9
  -5   2   1 636.158 18.2054   4
  -5   2   1 650.967 20.7151  11
  -5   2   1 683.181 29.0052   2
  -5   2   1 668.652 29.6620   1
  -5   2   1 662.243 20.5740   5
   4  -2  -1 1.68840 1.03427   9
   4  -2  -1 1.55775 0.90075   4
   4  -2  -1 0.46923 1.36996   3
   4  -2  -1 1.76347 2.24047   1
  -4   2   1 1.35822 1.21344  11
  -4   2   1 1.09902 1.03689   9
  -4   2   1 3.28613 1.33586   3
  -4   2   1 1.45830 0.82850   4
  -4   2   1 0.75163 0.98012   5
  -4   2   1 -1.5433 3.83587  13
  -4   2   1 0.87758 0.81154   8
   3  -2  -1 1849.83 43.2973   4
   3  -2  -1 1805.86 46.7907   3
   3  -2  -1 1917.84 56.0264   1
   3  -2  -1 1871.39 45.1170   9
  -3   2   1 1911.49 43.8602   8
  -3   2   1 1844.81 45.9450  11
  -3   2   1 1846.95 45.9003   3
  -3   2   1 1846.06 43.3033   4
  -3   2   1 1906.78 63.6892  13
  -3   2   1 1925.47 46.8398  12
  -3   2   1 1944.48 46.9423  12
  -3   2   1 1881.86 45.1243   9
  -3   2   1 1945.07 45.9073   5
  -3   2   1 2001.98 55.0681   1
   2  -2  -1 3.49190 1.01597   9
   2  -2  -1 4.14526 1.47747   3
   2  -2  -1 1.63922 2.62491   1
   2  -2  -1 5.90692 0.89836   4
  -2   2   1 4.90218 1.74818   3
  -2   2   1 3.66528 2.26695   1
  -2   2   1 3.65584 0.72843   4
  -2   2   1 0.51864 1.76712  12
  -2   2   1 1.61056 2.09360  13
  -2   2   1 6.09562 1.25343   8
  -2   2   1 5.25900 1.38081   9
  -2   2   1 5.19465 1.33747   5
   1  -2  -1 64.1397 5.64816  12
   1  -2  -1 63.3220 2.86471   9
   1  -2  -1 55.5888 7.06803   1
   1  -2  -1 61.1650 3.31049   3
   1  -2  -1 56.9231 3.15963   5
  -1   2   1 59.2189 3.47055   3
  -1   2   1 62.4595 6.81487   1
  -1   2   1 68.6589 6.84996  13
  -1   2   1 58.9845 3.23000   5
  -1   2   1 63.2353 2.90885   9
  -1   2   1 60.4956 2.22151   7
  -1   2   1 68.2678 5.49057  12
   0  -2  -1 0.89123 1.08691   1
   0  -2  -1 0.77171 0.35991   9
   0  -2  -1 -0.0215 0.35317   5
   0  -2  -1 0.36837 0.40611   7
   0  -2  -1 0.86224 0.68075  10
   0  -2  -1 0.11018 0.44774   3
   0  -2  -1 1.69508 1.28045  12
   0   2   1 0.20278 0.38032   7
   0   2   1 0.12639 0.49427   5
   0   2   1 0.45874 0.40423   3
   0   2   1 1.28946 0.80395  10
   0   2   1 3.03704 1.46234   1
   0   2   1 0.99578 0.42623   9
  -1  -2  -1 192.617 6.00831   7
  -1  -2  -1 200.149 5.32792   4
  -1  -2  -1 190.878 6.44622   5
  -1  -2  -1 203.712 12.1231  12
  -1  -2  -1 192.753 6.00513   3
   1   2   1 200.246 6.62883   5
   1   2   1 197.165 5.26664   4
   1   2   1 201.336 9.89224   1
   1   2   1 191.542 6.35940  10
  -2  -2  -1 0.78126 0.45172   6
  -2  -2  -1 0.36333 0.43897  11
  -2  -2  -1 0.74087 0.53333  10
  -2  -2  -1 0.60620 0.43429   2
  -2  -2  -1 1.13433 0.63690   7
  -2  -2  -1 0.64139 0.57045   5
  -2  -2  -1 0.14682 0.45267   4
  -2  -2  -1 -0.6588 1.62683  12
  -2  -2  -1 -1.2597 1.25743  13
   2   2   1 0.54530 0.47417   7
   2   2   1 0.49307 0.48666   2
   2   2   1 1.23397 0.71023  10
   2   2   1 0.70118 0.51044  11
   2   2   1 0.49962 0.93674   1
   2   2   1 0.66039 0.64908   5
   2   2   1 0.73192 0.44942   4
   2   2   1 2.01780 1.40577   1
  -3  -2  -1 1046.96 24.9409   2
  -3  -2  -1 1019.41 26.0906  10
  -3  -2  -1 1028.52 25.3684   7
  -3  -2  -1 1021.28 25.3698   4
  -3  -2  -1 1061.09 25.6036  11
  -3  -2  -1 1084.02 35.5805  13
  -3  -2  -1 1008.79 35.8671   1
  -3  -2  -1 1105.60 36.8140  12
  -3  -2  -1 1016.67 24.8283   6
  -3  -2  -1 1007.33 25.0962   9
   3   2   1 1039.33 26.4704  10
   3   2   1 1039.23 25.0846   2
   3   2   1 1049.66 35.7900   1
   3   2   1 1018.78 25.2250   4
   3   2   1 1069.93 25.4106   7
  -4  -2  -1 6.70835 3.01918   1
  -4  -2  -1 8.71974 1.60724   2
  -4  -2  -1 7.80176 1.64487   4
  -4  -2  -1 8.48654 3.45745  12
  -4  -2  -1 8.59144 1.72114  11
  -4  -2  -1 6.44592 1.21574   6
  -4  -2  -1 8.62349 1.65990   9
  -4  -2  -1 8.24967 3.47193  13
  -4  -2  -1 7.73147 1.84977  10
  -4  -2  -1 7.37151 1.43756   7
   4   2   1 8.44911 1.64080   2
   4   2   1 8.38254 2.01126  10
   4   2   1 10.8209 1.54720   7
   4   2   1 5.48421 1.28932   4
   4   2   1 8.25613 1.79978  11
  -5  -2  -1 2981.29 70.7405  11
  -5  -2  -1 3022.66 70.4539   4
  -5  -2  -1 2995.57 71.9730  10
  -5  -2  -1 3011.66 87.7337   1
  -5  -2  -1 2971.72 70.3738   9
  -5  -2  -1 2980.66 68.8317   6
  -5  -2  -1 3137.48 84.9221  12
  -5  -2  -1 3062.86 90.4914  13
  -5  -2  -1 2967.68 69.4601   2
  -5  -2  -1 3139.23 69.6955   7
   5   2   1 3122.20 88.0149   1
   5   2   1 3039.53 71.1148  11
   5   2   1 2986.23 70.1300   4
   5   2   1 3052.47 69.4075   7
   5   2   1 3107.97 70.5033   2
  -6  -2  -1 0.79445 1.21593  10
  -6  -2  -1 1.82169 1.26255   4
  -6  -2  -1 -0.8159 0.67876   6
  -6  -2  -1 0.02615 0.91176   2
  -6  -2  -1 0.84514 1.06087   9
  -6  -2  -1 -2.8805 1.92292   1
  -6  -2  -1 1.96108 1.20522  11
  -6  -2  -1 -1.3264 3.29145  13
  -6  -2  -1 0.11975 3.30959  12
  -6  -2  -1 1.51004 1.06706   7
   6   2   1 1.87116 1.30734   2
   6   2   1 1.08940 1.08480   7
   6   2   1 1.44051 1.45079  11
   6   2   1 0.53129 0.92758   4
   6   2   1 3.22007 3.48765  12
   6   2   1 0.79622 1.95732   1
  -7  -2  -1 65.5373 4.37524   7
  -7  -2  -1 57.2344 9.66002   1
  -7  -2  -1 56.1053 5.39514  10
  -7  -2  -1 59.6985 4.49737   2
  -7  -2  -1 69.9888 9.20642  12
  -7  -2  -1 54.5761 4.83053  11
  -7  -2  -1 53.8657 10.8892  13
  -7  -2  -1 59.6211 4.85096   4
  -7  -2  -1 65.5961 5.13725   9
  -7  -2  -1 65.4182 4.04551   6
   7   2   1 58.4724 5.23346  11
   7   2   1 70.7762 4.42897   7
   7   2   1 57.1039 9.70640   1
   7   2   1 60.1552 4.63259   4
   7   2   1 69.4219 5.47364   2
  -8  -2  -1 26.4742 3.67558   4
  -8  -2  -1 31.6773 4.45165  10
  -8  -2  -1 32.5569 4.22960   9
  -8  -2  -1 31.0222 4.06306  11
  -8  -2  -1 35.4205 9.32357   1
  -8  -2  -1 37.9455 3.57321   7
  -8  -2  -1 32.0769 3.09674   6
  -8  -2  -1 26.9267 5.89821   2
   8   2   1 28.1377 3.27514   7
   8   2   1 31.5117 3.62253   4
   8   2   1 42.3448 10.1788   1
   8   2   1 26.9059 4.06371  11
   8   2   1 38.0415 5.02745   2
  -9  -2  -1 7.58060 5.27012   1
  -9  -2  -1 7.82807 2.72897  11
  -9  -2  -1 6.35815 2.23157   2
  -9  -2  -1 1.57031 1.79660   4
  -9  -2  -1 2.42277 1.64385   7
  -9  -2  -1 2.06243 2.12887   9
  -9  -2  -1 7.11715 2.89900  10
  -9  -2  -1 7.99440 1.91834   6
   9   2   1 6.16700 2.78571  11
   9   2   1 -0.3687 3.99673   1
   9   2   1 8.40447 3.51449   2
   9   2   1 8.29440 2.60067   4
   9   2   1 6.74984 2.12079   7
 -10  -2  -1 22.0512 3.55331   7
 -10  -2  -1 12.9919 3.58588  11
 -10  -2  -1 13.3115 7.06816   1
 -10  -2  -1 20.5998 2.91987   6
 -10  -2  -1 15.2931 3.62877   4
 -10  -2  -1 20.8409 4.06848   2
 -10  -2  -1 18.4233 4.28319   9
 -10  -2  -1 18.2559 4.66039  10
  10   2   1 21.4463 4.95913   4
  10   2   1 22.4644 4.74094  11
  10   2   1 25.3371 3.77948   7
  10   2   1 8.47668 8.62887   1
 -11  -2  -1 22.0412 4.15591   2
 -11  -2  -1 14.4046 3.79403   4
 -11  -2  -1 19.2864 4.39436   9
 -11  -2  -1 17.0880 2.91608   6
  11   2   1 12.1579 3.56298   4
  11   2   1 18.7061 3.80429   7
  11   2   1 25.8708 5.26342  11
  11   2   1 10.3107 9.13363   1
 -12  -2  -1 27.0011 4.95033   2
 -12  -2  -1 23.0889 4.96484   9
 -12  -2  -1 27.1314 3.71173   6
 -12  -2  -1 24.9897 5.17449   4
  12   2   1 23.0302 4.35451   7
  12   2   1 26.6875 6.11607  11
  12   2   1 25.0623 4.89481   3
 -13  -2  -1 283.886 15.1234   4
 -13  -2  -1 268.376 15.6156   9
 -13  -2  -1 218.007 14.3575   6
 -13  -2  -1 224.528 13.4951   2
  13   2   1 273.647 13.8056   3
  13   2   1 255.402 12.4996   7
  13   2   1 263.000 16.4119  11
 -14  -2  -1 13.3258 4.64188   2
 -14  -2  -1 19.0763 5.12209   4
 -14  -2  -1 20.9474 3.61603   6
  14   2   1 17.2711 5.01009   3
  14   2   1 12.6490 4.79736   7
 -15  -2  -1 21.9854 5.72390   4
 -15  -2  -1 26.6382 7.25354   9
 -15  -2  -1 39.4921 4.60700   6
  15   2   1 37.0838 8.34460  11
  15   2   1 46.6671 6.84202   7
  15   2   1 34.3682 7.07703   3
 -16  -2  -1 9.50185 4.31029   4
 -16  -2  -1 9.29901 4.33020   9
 -16  -2  -1 7.12862 2.63009   6
  16   2   1 8.63992 5.68963   3
  16   2   1 7.05271 6.73979   7
 -17  -2  -1 -0.1700 3.49542   4
 -17  -2  -1 12.9564 5.53320   9
 -17  -2  -1 3.24797 2.68861   6
 -15   3   1 -0.9720 4.07120   5
 -15   3   1 1.53502 3.15733   4
 -15   3   1 0.26574 3.87684   9
  14  -3  -1 2.62739 3.86155   3
 -14   3   1 4.04911 3.37140   5
 -14   3   1 4.11244 3.15626   4
 -14   3   1 0.00385 2.88218   9
  13  -3  -1 -3.5919 3.16980   3
 -13   3   1 0.59844 2.95919   9
 -13   3   1 5.40604 3.05478   4
 -13   3   1 -2.8708 3.07282   5
  12  -3  -1 263.050 14.0275   3
 -12   3   1 232.536 16.5509   5
 -12   3   1 225.504 14.8120   9
 -12   3   1 233.244 13.0401   4
  11  -3  -1 270.020 13.8384   4
  11  -3  -1 314.416 15.6181   3
 -11   3   1 310.833 16.7694   9
 -11   3   1 323.656 14.7861   4
 -11   3   1 318.170 17.3912   5
  10  -3  -1 427.335 16.9568   4
  10  -3  -1 428.730 23.5826   3
 -10   3   1 462.640 20.6026   5
 -10   3   1 440.325 19.5800   9
 -10   3   1 446.231 17.2040   4
 -10   3   1 393.000 22.0608   2
   9  -3  -1 34.9759 6.15048   3
   9  -3  -1 35.9760 4.34674   4
  -9   3   1 32.1326 6.04618   5
  -9   3   1 25.8878 5.20883   9
  -9   3   1 27.0325 5.07416   4
  -9   3   1 19.1306 6.17257   2
   8  -3  -1 207.560 9.70461   4
   8  -3  -1 246.068 12.3290   3
   8  -3  -1 171.888 18.6658   1
  -8   3   1 224.994 12.4050   5
  -8   3   1 201.358 8.50863   8
  -8   3   1 203.839 9.77976   4
  -8   3   1 210.767 11.9506  11
  -8   3   1 224.480 14.8175   2
  -8   3   1 213.840 20.9881   1
  -8   3   1 225.268 12.0135   9
   7  -3  -1 12.8777 2.84150   4
   7  -3  -1 13.0700 5.71619   1
   7  -3  -1 12.4201 3.01837   9
   7  -3  -1 12.8865 3.44914   3
  -7   3   1 10.0898 3.14388  11
  -7   3   1 12.5696 3.59682   5
  -7   3   1 14.0980 3.44835   9
  -7   3   1 5.56969 3.89022   1
  -7   3   1 11.6066 2.72002   8
  -7   3   1 12.9311 2.60130   4
  -7   3   1 8.66593 4.15699   2
   6  -3  -1 50.0201 4.71340   9
   6  -3  -1 40.1694 8.82858   1
   6  -3  -1 44.3624 4.95720   3
  -6   3   1 37.5214 7.99183   1
  -6   3   1 46.1063 3.59362   8
  -6   3   1 46.1632 4.98754  11
  -6   3   1 43.6522 6.59638   2
  -6   3   1 49.9522 3.91974   4
  -6   3   1 50.7314 6.20502   5
  -6   3   1 51.3748 4.96050   9
   5  -3  -1 9.24890 2.70975   3
   5  -3  -1 9.35663 2.31967   9
   5  -3  -1 11.2026 2.11642   4
   5  -3  -1 12.1483 5.62851   1
  -5   3   1 12.0579 2.04802   4
  -5   3   1 12.4852 2.96258   5
  -5   3   1 12.3830 2.19883   8
  -5   3   1 11.6752 2.72919  11
  -5   3   1 8.80910 2.35773   9
  -5   3   1 13.2807 2.69291   3
  -5   3   1 5.00776 3.37919   1
   4  -3  -1 507.699 26.1184   1
   4  -3  -1 511.053 14.4001   4
   4  -3  -1 553.129 17.3641   3
  -4   3   1 521.535 16.9755   3
  -4   3   1 530.588 14.5466   4
  -4   3   1 505.170 18.8853  12
  -4   3   1 555.082 17.4443   5
  -4   3   1 522.999 23.9665   1
  -4   3   1 539.532 17.5853  11
  -4   3   1 539.278 16.5723   9
  -4   3   1 492.021 29.9383  13
  -4   3   1 527.247 15.0890   8
   3  -3  -1 424.268 19.2776  12
   3  -3  -1 421.843 13.6758   3
   3  -3  -1 408.633 12.9570   9
   3  -3  -1 404.078 11.2811   4
   3  -3  -1 394.491 22.8470   1
  -3   3   1 437.153 14.0848   5
  -3   3   1 423.282 19.4866   1
  -3   3   1 458.601 25.4098  13
  -3   3   1 416.531 14.1381  11
  -3   3   1 415.606 14.9588   3
  -3   3   1 406.432 17.7269  12
  -3   3   1 415.350 11.3171   4
  -3   3   1 429.163 12.6398   8
  -3   3   1 417.757 13.1214   9
   2  -3  -1 2737.83 85.8707  12
   2  -3  -1 2908.29 65.7409   9
   2  -3  -1 2847.00 63.7684   4
   2  -3  -1 2894.21 66.4844   3
   2  -3  -1 2797.73 83.2658   1
  -2   3   1 2841.80 68.0135   3
  -2   3   1 3015.74 67.1379   5
  -2   3   1 2982.24 76.0290   1
  -2   3   1 2806.39 63.6531   4
  -2   3   1 2924.09 65.7790   9
  -2   3   1 2821.94 79.0944  12
  -2   3   1 3062.62 86.3254  13
   1  -3  -1 23.5602 4.73803   1
   1  -3  -1 23.2437 1.28184   6
   1  -3  -1 20.7544 2.10810   5
   1  -3  -1 27.2027 5.06333  12
   1  -3  -1 22.7794 1.79340   9
   1  -3  -1 23.5508 2.18195   3
  -1   3   1 24.7547 2.29976   3
  -1   3   1 26.5913 2.40059   5
  -1   3   1 25.8287 5.51623  13
  -1   3   1 22.1378 1.61544   7
  -1   3   1 26.8899 4.37784  12
  -1   3   1 23.9153 1.81771   9
  -1   3   1 27.7732 6.37109   1
   0  -3  -1 15.7993 3.36162   1
   0  -3  -1 20.3093 1.28372   9
   0  -3  -1 17.4361 1.83474   5
   0  -3  -1 22.1869 2.49880  10
   0  -3  -1 16.1099 1.70980   3
   0  -3  -1 18.4932 1.34088   6
   0  -3  -1 13.2248 4.11753  12
   0   3   1 22.5214 2.56547  10
   0   3   1 18.5315 1.61052   7
   0   3   1 17.1892 1.78181   3
   0   3   1 17.9015 3.91158   1
   0   3   1 20.2859 1.37397   9
   0   3   1 20.1380 2.14128   5
  -1  -3  -1 4.44717 0.87921   6
  -1  -3  -1 4.99523 2.35193  12
  -1  -3  -1 4.13631 0.74831   9
  -1  -3  -1 5.24964 1.20260   3
  -1  -3  -1 3.10443 1.78797   1
  -1  -3  -1 5.64046 1.48349  10
  -1  -3  -1 3.38531 1.14252   5
  -1  -3  -1 4.29687 1.05961   7
  -1  -3  -1 3.06247 0.66614   4
   1   3   1 5.63909 1.30969  10
   1   3   1 4.18507 1.03843   3
   1   3   1 4.96088 0.72771   4
   1   3   1 4.91859 2.43988  12
   1   3   1 4.84520 1.38253   5
   1   3   1 3.71009 1.04343   7
   1   3   1 3.05521 1.76435   1
  -2  -3  -1 24.0547 2.15476   7
  -2  -3  -1 24.9568 2.03917   2
  -2  -3  -1 25.4191 2.25779   5
  -2  -3  -1 21.6780 5.69646  12
  -2  -3  -1 25.9453 2.26079  10
  -2  -3  -1 21.7979 1.80369   6
  -2  -3  -1 26.1950 1.85594   4
   2   3   1 24.6824 4.04512   1
   2   3   1 24.3015 1.77291   4
   2   3   1 23.4244 1.99464   3
   2   3   1 25.7555 2.09217  11
   2   3   1 23.8048 2.06963   7
   2   3   1 24.8941 2.31161   5
   2   3   1 24.3117 2.35985  10
   2   3   1 22.9654 2.06567   2
   2   3   1 27.7377 5.36647  12
   2   3   1 24.0827 5.09087   1
  -3  -3  -1 2.60662 1.07079   5
  -3  -3  -1 1.60705 0.74045   6
  -3  -3  -1 1.53125 0.82210  10
  -3  -3  -1 4.24198 2.29274  13
  -3  -3  -1 2.55774 0.82777   9
  -3  -3  -1 2.83302 0.96889   2
  -3  -3  -1 1.68124 0.85019  11
  -3  -3  -1 1.56970 0.83374   4
  -3  -3  -1 2.61435 2.76517  12
  -3  -3  -1 1.65497 0.92300   7
   3   3   1 1.51377 0.88359   2
   3   3   1 1.28587 0.82318  11
   3   3   1 0.73229 0.82809  10
   3   3   1 0.85237 1.84460  12
   3   3   1 1.90772 0.83757   4
   3   3   1 2.65900 2.00956   1
   3   3   1 1.90577 0.89753   7
  -4  -3  -1 211.712 14.5952  13
  -4  -3  -1 191.982 8.10761  10
  -4  -3  -1 192.657 7.52974  11
  -4  -3  -1 188.215 7.02337   9
  -4  -3  -1 193.789 7.02538   6
  -4  -3  -1 197.024 7.50502   4
  -4  -3  -1 216.348 15.5321   1
  -4  -3  -1 197.576 15.3124  12
  -4  -3  -1 192.810 7.19081   2
  -4  -3  -1 192.442 7.55156   7
   4   3   1 195.641 7.69301  11
   4   3   1 190.838 7.30060   4
   4   3   1 188.334 7.33652   7
   4   3   1 196.580 8.46140  10
   4   3   1 192.898 14.5181  12
   4   3   1 204.847 15.2132   1
   4   3   1 193.908 7.39711   2
  -5  -3  -1 8.91752 4.26766   1
  -5  -3  -1 2.47160 3.34984  12
  -5  -3  -1 6.94256 4.56454  13
  -5  -3  -1 2.47685 1.15450   4
  -5  -3  -1 4.99466 1.51454   7
  -5  -3  -1 3.80173 1.30534   6
  -5  -3  -1 4.59041 1.41923   2
  -5  -3  -1 3.96383 1.43665  11
  -5  -3  -1 4.12715 1.35541   9
  -5  -3  -1 4.75663 1.79476  10
   5   3   1 7.28051 3.14834  12
   5   3   1 1.19030 2.29743   1
   5   3   1 4.39303 1.33733   7
   5   3   1 5.48294 1.54916   2
   5   3   1 4.71244 1.52873  11
   5   3   1 5.44573 1.95841  10
   5   3   1 2.75565 1.16215   4
  -6  -3  -1 6728.92 156.179  10
  -6  -3  -1 6791.19 153.402   2
  -6  -3  -1 7085.09 153.865   7
  -6  -3  -1 7097.26 180.612  13
  -6  -3  -1 7044.93 179.076   1
  -6  -3  -1 7192.78 176.306  12
  -6  -3  -1 6757.75 152.626   6
  -6  -3  -1 6829.86 154.482   4
  -6  -3  -1 6707.71 154.484  11
  -6  -3  -1 6796.99 154.195   9
   6   3   1 6732.67 153.962   4
   6   3   1 6816.73 153.238   7
   6   3   1 7082.96 178.806   1
   6   3   1 6787.56 173.650  12
   6   3   1 6862.10 157.386  10
   6   3   1 6853.30 155.112  11
   6   3   1 6841.03 154.417   2
  -7  -3  -1 2.14900 1.36713  11
  -7  -3  -1 -0.9678 0.74336   6
  -7  -3  -1 -0.4942 0.91636   4
  -7  -3  -1 -0.9637 1.09290  10
  -7  -3  -1 -3.5143 2.68641   1
  -7  -3  -1 2.66388 5.11324  13
  -7  -3  -1 0.17579 1.07853   7
  -7  -3  -1 0.11736 0.94069   2
  -7  -3  -1 1.28534 1.26625   9
  -7  -3  -1 -3.0452 4.18502  12
   7   3   1 -0.8881 1.05717  11
   7   3   1 -1.8945 0.98667   2
   7   3   1 0.88796 0.68226   8
   7   3   1 5.90536 5.49597  12
   7   3   1 0.69906 3.56958   1
   7   3   1 0.77038 0.97482   4
   7   3   1 -0.8206 0.84050   7
  -8  -3  -1 96.1413 6.45903   2
  -8  -3  -1 100.664 6.81804   4
  -8  -3  -1 117.319 14.6771   1
  -8  -3  -1 105.432 7.75315  10
  -8  -3  -1 105.419 5.79554   6
  -8  -3  -1 111.180 7.24366  11
  -8  -3  -1 103.950 6.17131   7
  -8  -3  -1 109.094 7.08896   9
   8   3   1 95.1823 6.40394   4
   8   3   1 101.184 4.02615   8
   8   3   1 103.247 6.05770   7
   8   3   1 108.330 13.8858   1
   8   3   1 105.773 7.47147   2
   8   3   1 99.1244 7.17902  11
  -9  -3  -1 19.7528 3.37467   7
  -9  -3  -1 15.0349 2.68176   6
  -9  -3  -1 16.1068 6.72400   1
  -9  -3  -1 12.7910 3.34293  11
  -9  -3  -1 13.4668 3.33575   4
  -9  -3  -1 12.7532 3.12952   9
  -9  -3  -1 11.6766 3.46428  10
  -9  -3  -1 12.6740 3.04555   2
   9   3   1 14.8102 4.28412   2
   9   3   1 14.7784 3.49888  11
   9   3   1 13.1017 3.02957   4
   9   3   1 16.0988 8.19115   1
   9   3   1 15.7242 3.16755   7
 -10  -3  -1 64.0057 6.99949  10
 -10  -3  -1 73.1496 15.9759   1
 -10  -3  -1 77.2524 6.75915   4
 -10  -3  -1 66.7060 6.60416   9
 -10  -3  -1 81.3906 5.45118   6
 -10  -3  -1 76.9394 6.84188  11
 -10  -3  -1 75.4702 6.08335   2
 -10  -3  -1 83.5356 5.96288   7
  10   3   1 70.2183 7.07641  11
  10   3   1 73.3385 5.61599   7
  10   3   1 81.8761 13.3092   1
  10   3   1 72.9563 7.91246   2
  10   3   1 71.3623 6.19152   4
 -11  -3  -1 47.9280 11.7803   1
 -11  -3  -1 19.7069 6.01686  10
 -11  -3  -1 26.9845 5.24360   4
 -11  -3  -1 25.2008 3.76718   6
 -11  -3  -1 28.5709 5.48904   9
 -11  -3  -1 30.0566 4.44311   2
  11   3   1 29.8551 6.06744   2
  11   3   1 32.0980 4.36836   7
  11   3   1 22.1875 4.53105   4
  11   3   1 15.2995 8.04574   1
  11   3   1 29.6444 6.30480  11
 -12  -3  -1 34.4339 6.31542   9
 -12  -3  -1 31.6253 5.94684   4
 -12  -3  -1 38.2200 4.41376   6
 -12  -3  -1 29.9803 5.32562   2
  12   3   1 26.1193 5.74819  11
  12   3   1 34.7051 4.62933   7
 -13  -3  -1 17.2878 4.32260   2
 -13  -3  -1 16.1351 4.42148   4
 -13  -3  -1 15.7673 3.36047   6
 -13  -3  -1 10.2298 4.28488   9
  13   3   1 8.32546 3.97219  11
  13   3   1 12.8676 3.88444   7
 -14  -3  -1 733.737 28.9991   9
 -14  -3  -1 695.994 27.6477   4
 -14  -3  -1 709.613 22.4248   6
 -14  -3  -1 683.964 25.3254   2
  14   3   1 703.184 24.2723   7
  14   3   1 721.911 26.2593   3
  14   3   1 710.519 30.3529  11
 -15  -3  -1 27.4171 6.32950   4
 -15  -3  -1 26.8417 4.58306   6
 -15  -3  -1 22.1330 5.87189   9
  15   3   1 37.5262 6.37961   3
  15   3   1 26.7161 6.72990  11
  15   3   1 34.4007 6.38593   7
 -16  -3  -1 -0.2015 3.04204   4
 -16  -3  -1 -1.4525 2.32817   6
 -16  -3  -1 1.98791 4.07657   9
  16   3   1 5.69457 4.93152  11
  16   3   1 4.16415 5.90891   7
  16   3   1 6.50929 4.73020   3
 -17  -3  -1 -3.3551 2.16936   6
 -17  -3  -1 2.33808 3.68772   4
 -17  -3  -1 2.11345 3.67726   9
  17   3   1 -4.3472 5.81206   3
  14  -4  -1 2.76760 3.83047   3
 -14   4   1 -2.8727 3.90212   5
 -14   4   1 -3.0212 3.08171   4
 -14   4   1 -0.1482 3.45846   9
  13  -4  -1 2.89358 3.78501   3
 -13   4   1 8.31319 3.36484   4
 -13   4   1 2.53776 3.50379   9
 -13   4   1 6.36020 3.94546   5
  12  -4  -1 1.35533 3.22758   3
 -12   4   1 -0.7306 2.76374   9
 -12   4   1 -0.4146 3.03370   5
 -12   4   1 3.41279 2.65543   4
  11  -4  -1 121.275 9.31200   3
  11  -4  -1 101.546 8.35717   4
 -11   4   1 124.337 8.84724   4
 -11   4   1 126.123 11.0264   5
 -11   4   1 115.326 10.3119   9
  10  -4  -1 31.1316 5.05690   4
  10  -4  -1 25.1867 5.99727   3
 -10   4   1 31.1639 6.52803   5
 -10   4   1 32.5385 4.76660   4
 -10   4   1 29.4364 8.22323   2
 -10   4   1 25.1428 5.42006   9
   9  -4  -1 3.35762 2.59383   4
   9  -4  -1 3.99596 2.40813   3
  -9   4   1 6.26172 4.75268   2
  -9   4   1 2.85253 2.48237   5
  -9   4   1 11.5845 3.84183   9
   8  -4  -1 58.4352 5.78422   3
   8  -4  -1 53.6159 13.0708   1
   8  -4  -1 51.2935 4.74293   4
  -8   4   1 52.3014 9.60048   2
  -8   4   1 48.3652 4.86055   8
  -8   4   1 43.8448 9.82297   1
  -8   4   1 45.8371 6.26520  11
  -8   4   1 57.8816 6.25557   9
  -8   4   1 60.4935 6.78194   5
  -8   4   1 59.7388 4.99575   4
   7  -4  -1 494.993 16.2847   4
   7  -4  -1 503.027 18.1501   3
   7  -4  -1 442.559 30.3110   1
  -7   4   1 495.499 16.1474   4
  -7   4   1 510.839 16.1552   8
  -7   4   1 530.311 20.0173   5
  -7   4   1 460.725 26.7250   1
  -7   4   1 537.115 25.2328   2
  -7   4   1 523.808 19.1648   9
   6  -4  -1 11.8368 2.49583   4
   6  -4  -1 11.6112 6.22285   1
   6  -4  -1 12.6983 3.02640   9
   6  -4  -1 14.7140 3.50173   3
  -6   4   1 5.58495 4.19665   1
  -6   4   1 10.4621 2.22064   4
  -6   4   1 8.10192 3.01500   5
  -6   4   1 12.6989 3.24016  11
  -6   4   1 8.18606 2.55439   9
  -6   4   1 10.1667 2.29971   8
   5  -4  -1 36.6354 3.83064   9
   5  -4  -1 34.7312 9.73016   1
   5  -4  -1 39.6333 4.13148   3
   5  -4  -1 36.2992 3.09827   4
  -5   4   1 35.9932 3.04142   4
  -5   4   1 34.0691 4.05094   3
  -5   4   1 36.7737 4.43692   5
  -5   4   1 34.2575 7.60070   1
  -5   4   1 36.4371 3.38402   8
  -5   4   1 35.8446 3.98503   9
  -5   4   1 42.0850 4.53701  11
   4  -4  -1 3.23523 5.34802   1
   4  -4  -1 7.47680 1.92469   9
   4  -4  -1 9.10852 2.35158   3
   4  -4  -1 6.21258 1.44093   4
  -4   4   1 8.17753 2.32681  11
  -4   4   1 11.4017 5.28128  13
  -4   4   1 5.82514 1.83955   9
  -4   4   1 5.94929 1.64149   8
  -4   4   1 6.71775 3.08767   1
  -4   4   1 -0.7210 3.64997  12
  -4   4   1 6.50342 1.35036   4
  -4   4   1 9.95434 2.70690   5
  -4   4   1 3.64477 1.90034   3
   3  -4  -1 40.3281 3.46493   3
   3  -4  -1 24.8558 6.87053  12
   3  -4  -1 40.0657 9.40682   1
   3  -4  -1 38.7683 3.27073   9
  -3   4   1 35.4845 5.44541   1
  -3   4   1 36.5698 3.77660   5
  -3   4   1 32.0624 6.34673  12
  -3   4   1 35.9021 3.18505   9
  -3   4   1 23.8082 7.01722  13
  -3   4   1 33.7879 2.18486   4
  -3   4   1 36.1123 4.18623   3
   2  -4  -1 51.6550 3.85933   5
   2  -4  -1 54.8937 3.75108   3
   2  -4  -1 54.2368 7.06622   1
   2  -4  -1 55.0490 3.37032   9
   2  -4  -1 51.1537 8.29588  12
  -2   4   1 65.0329 7.49330   1
  -2   4   1 54.3287 4.17933   3
  -2   4   1 48.3393 11.4700  13
  -2   4   1 54.3772 4.15288   5
  -2   4   1 57.5335 3.49691   9
  -2   4   1 50.3214 7.30509  12
  -2   4   1 52.0077 2.30568   4
   1  -4  -1 60.8929 6.36998   1
   1  -4  -1 74.5961 3.39294   9
   1  -4  -1 63.7707 3.81828   3
   1  -4  -1 65.2336 4.04344   5
   1  -4  -1 77.9769 9.12368  12
   1  -4  -1 67.3216 2.73732   6
  -1   4   1 84.0132 9.45257   1
  -1   4   1 65.1588 3.24701   9
  -1   4   1 71.0609 4.10274   3
  -1   4   1 65.0162 3.33309   7
  -1   4   1 69.5965 4.32317   5
  -1   4   1 58.7817 5.18112  10
  -1   4   1 75.1597 8.85046  12
   0  -4  -1 112.360 8.23869   1
   0  -4  -1 106.169 5.98753  10
   0  -4  -1 111.284 4.11243   6
   0  -4  -1 106.162 3.60522   9
   0  -4  -1 88.8476 10.9067  12
   0  -4  -1 106.913 5.01055   5
   0  -4  -1 106.718 4.98848   3
   0   4   1 107.990 4.91923   3
   0   4   1 101.893 8.94929   1
   0   4   1 112.431 5.58563   5
   0   4   1 112.194 3.81592   9
   0   4   1 109.887 4.73140   7
   0   4   1 107.715 6.10449  10
   0   4   1 104.277 10.6376  12
  -1  -4  -1 119.493 5.73602  10
  -1  -4  -1 108.639 3.93388   4
  -1  -4  -1 115.041 4.51355   6
  -1  -4  -1 111.294 5.09962   3
  -1  -4  -1 110.743 5.27248   5
  -1  -4  -1 109.268 11.7198  12
  -1  -4  -1 122.376 8.81751   1
   1   4   1 114.932 8.77681   1
   1   4   1 114.169 5.75877  10
   1   4   1 116.938 11.5550  12
   1   4   1 108.825 4.35213   6
   1   4   1 105.336 4.90249   7
   1   4   1 112.684 5.02901   3
   1   4   1 111.828 3.79712   4
   1   4   1 113.419 5.76724   5
  -2  -4  -1 53.9187 3.64735  10
  -2  -4  -1 47.3180 8.13488  12
  -2  -4  -1 54.3735 3.10158   6
  -2  -4  -1 53.0448 3.57252   5
  -2  -4  -1 49.9661 2.81107   4
   2   4   1 44.1156 7.55560  12
   2   4   1 52.2341 6.98316   1
   2   4   1 48.8419 6.13547   1
   2   4   1 51.7703 3.32570   3
   2   4   1 49.2725 3.32616   7
   2   4   1 50.8636 3.71604  10
   2   4   1 53.1592 2.79841   4
   2   4   1 54.5781 3.68525   5
   2   4   1 50.9505 3.48085   2
   2   4   1 52.2797 3.01301   6
  -3  -4  -1 187.435 7.85466  10
  -3  -4  -1 196.411 13.0258  13
  -3  -4  -1 193.684 7.08476   6
  -3  -4  -1 200.354 7.50090   2
  -3  -4  -1 204.045 16.7085  12
  -3  -4  -1 195.282 7.84394   7
  -3  -4  -1 197.289 7.16041   4
  -3  -4  -1 203.867 7.90993   5
  -3  -4  -1 196.265 6.16462   9
   3   4   1 203.034 8.12945   5
   3   4   1 191.916 7.33938  11
   3   4   1 197.915 7.08471   6
   3   4   1 200.746 7.00248   4
   3   4   1 194.986 7.62438   7
   3   4   1 194.202 16.0729  12
   3   4   1 194.731 13.3816   1
   3   4   1 199.915 8.23345  10
   3   4   1 195.563 14.4864   1
   3   4   1 193.648 7.68226   2
  -4  -4  -1 6.88315 1.90350   5
  -4  -4  -1 10.6626 2.09123   7
  -4  -4  -1 12.7980 1.88851   2
  -4  -4  -1 9.48484 1.80428   6
  -4  -4  -1 12.3658 2.45825  10
  -4  -4  -1 12.4231 1.62442   9
  -4  -4  -1 12.8340 1.93781   4
  -4  -4  -1 12.7167 2.15436  11
  -4  -4  -1 8.05890 4.00031   1
  -4  -4  -1 11.0564 4.15973  13
   4   4   1 12.5664 2.31808   2
   4   4   1 10.1730 2.00648   7
   4   4   1 14.3459 2.08659  11
   4   4   1 3.51362 3.59868  12
   4   4   1 8.83753 1.64235   6
   4   4   1 10.3930 2.39017  10
   4   4   1 11.8035 2.03772   4
   4   4   1 12.7326 4.96450   1
  -5  -4  -1 11.5643 4.86070   1
  -5  -4  -1 12.8984 2.35287   2
  -5  -4  -1 13.4503 1.93288   9
  -5  -4  -1 12.5683 2.26902   6
  -5  -4  -1 6.96208 4.34692  12
  -5  -4  -1 10.4058 2.06420   4
  -5  -4  -1 8.57888 2.00204   7
  -5  -4  -1 14.2520 3.47471  10
  -5  -4  -1 8.68091 1.97507  11
  -5  -4  -1 16.2017 5.10386  13
   5   4   1 14.9130 2.26291   2
   5   4   1 12.0257 2.65568  10
   5   4   1 9.74455 2.07764   4
   5   4   1 5.63571 3.75956   1
   5   4   1 11.2736 2.24291  11
   5   4   1 9.85188 1.91880   7
   5   4   1 6.92000 5.32020  12
  -6  -4  -1 10.5811 2.19633   2
  -6  -4  -1 7.41945 2.08506   7
  -6  -4  -1 10.3960 2.37762   4
  -6  -4  -1 8.58909 4.70202  13
  -6  -4  -1 15.4745 5.86649   1
  -6  -4  -1 7.81191 2.35343  10
  -6  -4  -1 12.1505 2.43464  11
  -6  -4  -1 7.43283 1.77070   6
  -6  -4  -1 13.2510 2.65585   9
  -6  -4  -1 12.9642 5.70205  12
   6   4   1 11.0175 2.44283   2
   6   4   1 8.46180 2.17334   4
   6   4   1 8.26554 5.10315   1
   6   4   1 9.17970 2.26129  11
   6   4   1 4.58502 4.25840  12
   6   4   1 13.3448 3.24696  10
  -7  -4  -1 577.557 32.9686  12
  -7  -4  -1 565.638 17.6866   2
  -7  -4  -1 522.021 32.0555  13
  -7  -4  -1 554.431 18.3147  11
  -7  -4  -1 535.555 34.9020   1
  -7  -4  -1 558.464 18.3189   4
  -7  -4  -1 555.149 16.8387   6
  -7  -4  -1 548.944 17.7787   9
  -7  -4  -1 575.929 17.9642   7
  -7  -4  -1 557.054 19.6575  10
   7   4   1 537.943 20.4089  10
   7   4   1 567.253 18.8342  11
   7   4   1 544.725 17.8278   4
   7   4   1 564.397 18.4619   2
   7   4   1 552.657 17.3574   7
   7   4   1 546.910 32.6799   1
   7   4   1 516.980 29.7037  12
  -8  -4  -1 17.5462 3.98169  10
  -8  -4  -1 28.0418 10.4210   1
  -8  -4  -1 17.6654 3.26507   7
  -8  -4  -1 18.9318 3.39477   2
  -8  -4  -1 18.9900 3.53213   4
  -8  -4  -1 18.3324 3.34162  11
  -8  -4  -1 22.0893 3.39184   9
  -8  -4  -1 19.9230 2.85528   6
   8   4   1 21.2276 3.17030   4
   8   4   1 21.5864 4.00268  11
   8   4   1 20.6366 2.12248   8
   8   4   1 25.2005 4.63203   2
   8   4   1 13.2144 6.35388   1
   8   4   1 19.0654 2.98298   7
  -9  -4  -1 9.38554 2.73865   4
  -9  -4  -1 11.1356 2.76597   7
  -9  -4  -1 8.93006 2.29636   6
  -9  -4  -1 12.0380 3.35581   9
  -9  -4  -1 9.21159 2.65440   2
  -9  -4  -1 11.0622 3.24941  10
  -9  -4  -1 8.89605 6.74810   1
  -9  -4  -1 6.00170 2.32642  11
   9   4   1 6.80028 5.67233   1
   9   4   1 11.7197 3.45927   2
   9   4   1 10.5897 2.69987   7
   9   4   1 11.0980 2.81550   4
   9   4   1 13.3760 3.33001  11
   9   4   1 13.2636 1.85593   8
 -10  -4  -1 39.0861 5.21485   4
 -10  -4  -1 33.1242 4.73428   9
 -10  -4  -1 36.7975 5.60048  10
 -10  -4  -1 37.1876 4.21255   2
 -10  -4  -1 30.7042 4.97265  11
 -10  -4  -1 13.4182 8.84817   1
 -10  -4  -1 27.7320 3.66628   6
  10   4   1 30.1299 5.90903   2
  10   4   1 34.7768 4.24335   7
  10   4   1 28.1456 10.3897   1
  10   4   1 36.1707 4.60379   4
  10   4   1 28.5081 5.13180  11
 -11  -4  -1 636.899 43.3940   1
 -11  -4  -1 675.124 21.0102   6
 -11  -4  -1 605.397 29.8193  10
 -11  -4  -1 683.442 24.5733   4
 -11  -4  -1 670.689 24.2740   9
 -11  -4  -1 667.533 22.6783   2
  11   4   1 617.973 24.8254   4
  11   4   1 697.286 25.6805  11
  11   4   1 674.287 21.6494   7
  11   4   1 631.544 42.7480   1
  11   4   1 699.289 26.9263   2
 -12  -4  -1 15.8881 3.26717   6
 -12  -4  -1 12.9020 3.94215   4
 -12  -4  -1 13.9557 3.81175   9
 -12  -4  -1 13.4587 3.53276   2
  12   4   1 8.77001 3.25445   7
  12   4   1 11.8097 5.42386   2
  12   4   1 13.2941 4.49938  11
 -13  -4  -1 4.00573 2.84186   4
 -13  -4  -1 4.51512 2.33742   6
 -13  -4  -1 0.91114 2.63602   9
 -13  -4  -1 0.88861 3.49080   2
  13   4   1 10.6330 4.10583   2
  13   4   1 2.83283 2.92262   7
 -14  -4  -1 21.0181 4.47971   2
 -14  -4  -1 23.5151 4.30410   6
 -14  -4  -1 22.9701 5.60626   4
 -14  -4  -1 23.7338 6.11552   9
  14   4   1 18.0790 4.82308   7
  14   4   1 14.8463 5.27346  11
 -15  -4  -1 120.602 11.2980   9
 -15  -4  -1 118.733 10.9550   4
 -15  -4  -1 120.046 8.18102   6
  15   4   1 108.180 11.6674  11
  15   4   1 122.064 10.3162   3
  15   4   1 120.013 12.5433   7
 -16  -4  -1 0.11931 2.93067   6
 -16  -4  -1 4.99398 4.58051   9
 -16  -4  -1 10.1925 4.38398   4
  16   4   1 10.3308 4.39370   3
  16   4   1 8.96199 4.90827  11
  16   4   1 12.6696 6.32296   7
 -17  -4  -1 21.5488 5.98952   4
 -17  -4  -1 18.7112 5.48526   9
 -17  -4  -1 18.1887 4.26490   6
  17   4   1 10.8108 6.02226   3
  17   4   1 12.8773 5.69845  11
  14  -5  -1 139.419 10.4251   3
 -14   5   1 145.377 11.0988   4
 -14   5   1 150.490 13.6761   9
 -14   5   1 155.648 14.7384   5
  13  -5  -1 41.4359 6.42875   3
 -13   5   1 51.7776 6.49788   4
 -13   5   1 39.8691 7.84854   9
 -13   5   1 42.7367 9.24051   5
  12  -5  -1 4.62883 3.00886   3
 -12   5   1 0.87912 4.01861   5
 -12   5   1 3.93209 2.55202   4
 -12   5   1 0.58880 2.71434   9
  11  -5  -1 42.9860 6.12847   3
 -11   5   1 44.6869 6.58066   9
 -11   5   1 42.4181 10.6445   5
 -11   5   1 49.2914 5.96432   4
  10  -5  -1 3.41153 3.00115   3
 -10   5   1 5.45661 2.57771   9
 -10   5   1 4.26602 2.18497   4
 -10   5   1 4.03170 3.23699   5
   9  -5  -1 9.90317 3.11349   3
  -9   5   1 -1.7728 5.23619   2
  -9   5   1 4.31409 2.22707   4
  -9   5   1 9.48174 3.18961   8
  -9   5   1 4.02286 2.96999   5
  -9   5   1 2.89996 2.46678   9
   8  -5  -1 9.20397 3.31277   3
  -8   5   1 14.3883 5.65801   2
  -8   5   1 20.5656 3.87038   8
  -8   5   1 10.4921 3.66075   9
  -8   5   1 12.3902 2.82363   4
  -8   5   1 11.2975 3.66730   5
   7  -5  -1 26.7395 4.17549   3
  -7   5   1 30.6772 3.87416   8
  -7   5   1 25.1302 4.73703  11
  -7   5   1 28.1718 3.37527   4
  -7   5   1 23.4123 5.06314   5
  -7   5   1 29.2932 7.03783   1
  -7   5   1 23.2654 4.54838   9
   6  -5  -1 1814.91 45.3355   3
   6  -5  -1 1570.99 68.3881   1
  -6   5   1 1739.49 46.0264   3
  -6   5   1 1670.76 50.4441   9
  -6   5   1 1786.18 42.7202   4
  -6   5   1 1777.99 57.5211   1
  -6   5   1 1738.14 48.0349  11
  -6   5   1 1813.84 48.0789   5
  -6   5   1 1749.24 44.4170   8
   5  -5  -1 552.548 17.6978   3
   5  -5  -1 459.173 29.6999   1
   5  -5  -1 536.516 18.0119   9
  -5   5   1 539.327 15.3224   4
  -5   5   1 541.131 17.0201   8
  -5   5   1 556.566 26.0401   1
  -5   5   1 529.702 18.9836   3
  -5   5   1 517.939 19.2688  11
  -5   5   1 553.811 18.2105   9
   4  -5  -1 195.794 16.6260   1
   4  -5  -1 211.567 9.14951   9
   4  -5  -1 219.158 9.20419   3
  -4   5   1 229.942 10.6415   5
  -4   5   1 215.371 9.27098   9
  -4   5   1 175.365 13.4809   3
  -4   5   1 194.151 14.0692   1
  -4   5   1 202.977 10.2189  11
  -4   5   1 217.974 7.24508   4
  -4   5   1 212.064 6.62739   7
   3  -5  -1 60.4247 10.6214  12
   3  -5  -1 82.5641 8.93671   1
   3  -5  -1 77.7901 4.96152   3
   3  -5  -1 74.8801 4.67031   9
  -3   5   1 67.0591 5.73332   3
  -3   5   1 80.5510 5.74023   5
  -3   5   1 77.2561 8.49929   1
  -3   5   1 77.2985 4.78625   9
  -3   5   1 85.2770 10.1619  12
  -3   5   1 80.5086 12.0967  13
  -3   5   1 76.2805 3.35548   4
   2  -5  -1 534.455 29.0893  12
   2  -5  -1 517.033 21.6722   1
   2  -5  -1 508.261 12.5895   6
   2  -5  -1 500.090 14.5868   9
   2  -5  -1 505.212 15.4956   3
  -2   5   1 491.482 19.7230  10
  -2   5   1 520.594 14.7693   9
  -2   5   1 516.453 16.5824   5
  -2   5   1 504.444 25.0754   1
  -2   5   1 497.288 16.1918   3
  -2   5   1 507.217 28.7273  13
  -2   5   1 553.101 28.2007  12
   1  -5  -1 3.02217 3.85029  12
   1  -5  -1 3.10261 1.29215   5
   1  -5  -1 2.50014 0.73704   6
   1  -5  -1 2.56029 1.97410   1
   1  -5  -1 3.05886 1.36450   3
   1  -5  -1 1.66893 0.78936   9
  -1   5   1 2.98030 1.47002   5
  -1   5   1 4.39674 3.43853  12
  -1   5   1 1.23058 1.16129   3
  -1   5   1 1.62720 0.80801   9
  -1   5   1 3.51424 1.80528  10
  -1   5   1 2.85065 1.05600   7
   0  -5  -1 5.94369 0.89132   9
   0  -5  -1 4.14660 0.97396   6
   0  -5  -1 4.82740 1.44778   5
   0  -5  -1 7.96137 4.56613  12
   0  -5  -1 7.13240 2.68239   1
   0  -5  -1 5.82255 1.56151   3
   0  -5  -1 9.26068 2.24416  10
   0   5   1 6.98265 1.06543   9
   0   5   1 8.78105 1.78164   7
   0   5   1 7.59754 2.97066   1
   0   5   1 7.53349 2.04825   5
   0   5   1 3.42613 3.37865  12
   0   5   1 5.73639 2.04337  10
   0   5   1 5.71043 1.53422   3
  -1  -5  -1 6.51426 1.77070   5
  -1  -5  -1 -1.0133 3.08255  12
  -1  -5  -1 1.45355 1.77873   1
  -1  -5  -1 5.08585 1.50962   3
  -1  -5  -1 3.64032 1.47757  10
  -1  -5  -1 5.08719 1.14082   6
   1   5   1 2.97383 3.49938  12
   1   5   1 1.10120 1.89056   1
   1   5   1 3.90378 1.31411   7
   1   5   1 7.09503 2.17459  10
   1   5   1 3.18564 1.25447   3
   1   5   1 5.14889 1.71328   5
   1   5   1 4.02642 1.06490   6
   1   5   1 3.34506 0.81496   4
  -2  -5  -1 1376.40 34.5762   5
  -2  -5  -1 1376.03 34.9101  10
  -2  -5  -1 1364.74 32.5556   4
  -2  -5  -1 1376.39 33.1834   6
   2   5   1 1372.66 33.9736   3
   2   5   1 1391.42 34.7835   5
   2   5   1 1342.92 35.1219  10
   2   5   1 1356.68 34.6493   2
   2   5   1 1383.80 32.2852   4
   2   5   1 1397.98 47.5754   1
   2   5   1 1360.42 44.5414   1
   2   5   1 1335.14 34.1494   7
   2   5   1 1350.59 32.9796   6
  -3  -5  -1 247.719 9.72503  10
  -3  -5  -1 240.946 8.71581   6
  -3  -5  -1 252.326 21.1053  12
  -3  -5  -1 240.608 8.50909   4
  -3  -5  -1 252.441 7.12611   9
  -3  -5  -1 247.079 15.1379  13
  -3  -5  -1 255.034 9.46616   2
  -3  -5  -1 252.921 9.50421   5
   3   5   1 241.264 9.32703   7
   3   5   1 248.298 8.37931   4
   3   5   1 237.120 18.4897   1
   3   5   1 237.151 17.0690   1
   3   5   1 253.236 9.04660  11
   3   5   1 246.159 9.13900   3
   3   5   1 250.472 10.1744  10
   3   5   1 246.707 8.67679   6
   3   5   1 230.151 19.1931  12
   3   5   1 261.769 9.85531   5
  -4  -5  -1 900.833 44.1479  12
  -4  -5  -1 900.218 34.2372  13
  -4  -5  -1 872.951 21.9621   9
  -4  -5  -1 879.315 24.9556  10
  -4  -5  -1 858.711 23.8807   2
  -4  -5  -1 895.419 24.6553   5
  -4  -5  -1 883.100 23.6424   4
   4   5   1 883.299 41.7229  12
   4   5   1 886.412 23.4251   6
   4   5   1 868.073 24.2382   7
   4   5   1 883.071 25.5186  10
   4   5   1 899.311 23.9871  11
   4   5   1 906.286 24.6315   2
   4   5   1 869.864 38.4961   1
   4   5   1 879.962 23.3071   4
  -5  -5  -1 3.01673 1.26044   6
  -5  -5  -1 1.42041 0.99740   5
  -5  -5  -1 3.12272 1.66392   7
  -5  -5  -1 2.27081 1.21375   2
  -5  -5  -1 2.30351 1.33552  11
  -5  -5  -1 2.64646 1.43877   4
  -5  -5  -1 3.26364 3.23452   1
  -5  -5  -1 3.18498 1.14072   9
  -5  -5  -1 -3.1552 3.37731  13
  -5  -5  -1 0.04752 3.87008  12
  -5  -5  -1 1.93392 1.20238  10
   5   5   1 3.47545 4.93335  12
   5   5   1 4.98426 1.74528  11
   5   5   1 2.19565 3.08961   1
   5   5   1 4.18929 1.60698   2
   5   5   1 3.60499 1.37638   7
   5   5   1 4.45851 1.35207   6
   5   5   1 2.65107 1.55626  10
  -6  -5  -1 272.183 10.3132   6
  -6  -5  -1 267.775 11.8369  10
  -6  -5  -1 255.888 12.3609   2
  -6  -5  -1 279.680 11.2150   4
  -6  -5  -1 275.426 10.9381  11
  -6  -5  -1 266.635 23.2894  12
  -6  -5  -1 273.342 11.2517   7
  -6  -5  -1 275.164 19.9862  13
  -6  -5  -1 276.367 10.1735   9
   6   5   1 280.643 10.8435   4
   6   5   1 274.567 10.9682   7
   6   5   1 291.460 22.6191  12
   6   5   1 271.894 12.5016  10
   6   5   1 281.348 11.2696   2
   6   5   1 296.842 22.5683   1
   6   5   1 266.907 11.0281  11
  -7  -5  -1 0.18324 1.16426   4
  -7  -5  -1 6.98308 6.08894  12
  -7  -5  -1 -0.1778 1.09106   2
  -7  -5  -1 0.34627 1.00231  11
  -7  -5  -1 0.73100 4.48361  13
  -7  -5  -1 -0.6356 0.75629   9
  -7  -5  -1 0.13439 1.14080   7
  -7  -5  -1 -1.9592 1.29259  10
  -7  -5  -1 -0.4873 0.82413   6
   7   5   1 -0.5620 0.78724   4
   7   5   1 0.04143 1.02557   7
   7   5   1 -0.3309 1.42659  10
   7   5   1 1.52765 1.45928   2
   7   5   1 1.13548 1.25016  11
  -8  -5  -1 67.6466 6.21280  10
  -8  -5  -1 60.2153 5.09615   9
  -8  -5  -1 66.4862 6.00510   4
  -8  -5  -1 66.0614 5.52036  11
  -8  -5  -1 67.4111 5.03215   6
  -8  -5  -1 71.3910 5.28388   2
  -8  -5  -1 70.9886 11.9442   1
   8   5   1 68.6686 5.31443   7
   8   5   1 60.6034 13.6664   1
   8   5   1 58.7964 6.80587  10
   8   5   1 71.2971 5.91916   2
   8   5   1 63.6684 5.24210   4
   8   5   1 58.4305 5.59382  11
  -9  -5  -1 8.71751 6.03682   1
  -9  -5  -1 3.84659 2.35613   9
  -9  -5  -1 10.9651 2.68390   2
  -9  -5  -1 9.39817 2.45707  11
  -9  -5  -1 8.17232 2.89444   4
  -9  -5  -1 6.89551 2.18989   6
  -9  -5  -1 7.80379 3.07293  10
   9   5   1 7.60933 1.76071   8
   9   5   1 8.27893 2.91419   2
   9   5   1 8.51930 2.85709  11
   9   5   1 9.13766 2.76939   4
   9   5   1 17.7780 6.99703   1
   9   5   1 8.88239 2.62323   7
 -10  -5  -1 293.925 12.9092   2
 -10  -5  -1 312.274 12.4827   6
 -10  -5  -1 293.297 15.2003  10
 -10  -5  -1 324.538 14.7894   4
 -10  -5  -1 342.316 29.6997   1
 -10  -5  -1 297.157 13.8090   9
 -10  -5  -1 282.468 13.8247  11
  10   5   1 298.899 14.7523  11
  10   5   1 304.666 12.8688   7
  10   5   1 282.979 14.6404   2
  10   5   1 282.783 27.1343   1
  10   5   1 297.341 13.6088   4
  10   5   1 320.157 10.3166   8
 -11  -5  -1 3.95498 6.81567   1
 -11  -5  -1 3.81239 2.08709   6
 -11  -5  -1 2.59712 2.05251   2
 -11  -5  -1 1.42910 2.12464   9
 -11  -5  -1 1.84304 2.30909   4
  11   5   1 2.99000 2.29417   7
  11   5   1 2.22611 1.21147   8
  11   5   1 1.05954 2.23294  11
  11   5   1 6.64554 9.67129   1
 -12  -5  -1 1284.12 35.5486   6
 -12  -5  -1 1231.42 37.0617   2
 -12  -5  -1 1259.93 39.4745   4
 -12  -5  -1 1272.24 39.0905   9
  12   5   1 1250.83 36.1503   7
  12   5   1 1300.71 40.9651  11
  12   5   1 1236.74 41.3759   2
 -13  -5  -1 3.97076 2.78099   9
 -13  -5  -1 7.90171 3.18728   2
 -13  -5  -1 8.80186 2.92967   6
 -13  -5  -1 1.87536 2.67649   4
  13   5   1 -3.8880 2.64061   2
  13   5   1 2.15034 2.90771  11
  13   5   1 10.2701 3.71987   7
 -14  -5  -1 31.5736 5.39094   2
 -14  -5  -1 45.3722 5.35420   6
 -14  -5  -1 36.4398 6.83235   9
 -14  -5  -1 45.5442 6.80573   4
  14   5   1 45.6077 9.23892   2
  14   5   1 33.4297 6.96460  11
  14   5   1 30.9219 5.43270   7
 -15  -5  -1 6.70219 3.64437   4
 -15  -5  -1 10.3858 3.17026   6
 -15  -5  -1 4.07963 3.73967   9
  15   5   1 6.66429 4.63038  11
  15   5   1 -1.4987 4.04012   7
 -16  -5  -1 9.32604 2.73178   6
 -16  -5  -1 0.47875 3.38528   4
 -16  -5  -1 1.31811 3.46342   9
  16   5   1 1.30383 3.67135  11
  16   5   1 7.36565 3.86626   3
 -17  -5  -1 10.6318 3.26459   6
 -17  -5  -1 4.03603 4.22276   9
 -17  -5  -1 5.92270 4.11657   4
  17   5   1 7.02353 4.71397  11
  17   5   1 6.13156 5.25413   3
  13  -6  -1 146.690 10.0360   3
 -13   6   1 153.614 10.2161   4
 -13   6   1 153.831 14.3206   5
 -13   6   1 155.635 13.1398   9
  12  -6  -1 -3.2174 2.63319   3
 -12   6   1 -4.1091 3.03092   5
 -12   6   1 1.19618 2.55985   4
  11  -6  -1 3.76648 2.90210   3
 -11   6   1 -4.8067 2.28136   9
 -11   6   1 0.42821 3.54597   5
 -11   6   1 1.77229 2.52334   4
  10  -6  -1 11.3786 3.91650   3
 -10   6   1 11.0787 3.13766   4
 -10   6   1 6.38621 3.48256   9
 -10   6   1 14.2202 4.70959   5
   9  -6  -1 157.334 12.0116   3
  -9   6   1 155.955 11.9133   5
  -9   6   1 138.297 11.3498   8
  -9   6   1 147.706 8.25299   4
  -9   6   1 150.160 10.4968   9
   8  -6  -1 5.40212 2.61894   3
  -8   6   1 6.40437 2.91803   5
  -8   6   1 2.21052 2.68152   8
  -8   6   1 4.60833 2.08692   4
  -8   6   1 8.20444 5.49047   2
   7  -6  -1 9.36863 2.68500   3
  -7   6   1 3.05916 1.65518   4
  -7   6   1 -1.0971 2.07292  11
  -7   6   1 6.74123 2.49705   8
  -7   6   1 6.78167 2.60086   9
  -7   6   1 2.35129 2.42875   5
   6  -6  -1 87.3389 13.1284   1
   6  -6  -1 113.190 7.09654   3
  -6   6   1 105.475 14.5529   1
  -6   6   1 97.6641 7.21078   3
  -6   6   1 93.7711 6.42958   8
  -6   6   1 108.578 9.81161  11
  -6   6   1 101.125 5.45372   4
  -6   6   1 97.0892 7.06247   9
  -6   6   1 102.635 8.38199   5
   5  -6  -1 1286.68 48.0205   1
   5  -6  -1 1277.77 34.6398   3
  -5   6   1 1268.37 34.6663   8
  -5   6   1 1311.03 37.8970  11
  -5   6   1 1313.62 44.6756   1
  -5   6   1 1311.24 35.4402   9
  -5   6   1 1268.81 37.7149   3
  -5   6   1 1276.32 31.7451   4
  -5   6   1 1339.75 37.9106   5
   4  -6  -1 43.4831 4.23664   3
   4  -6  -1 40.3937 7.63829   1
  -4   6   1 46.9824 2.89852   7
  -4   6   1 40.0063 5.28008   3
  -4   6   1 43.0284 4.61897  11
  -4   6   1 38.0794 2.71330   4
  -4   6   1 40.2111 7.46695   1
  -4   6   1 40.3404 4.90310   5
  -4   6   1 40.0505 3.99407   9
   3  -6  -1 23.8121 3.08730   3
   3  -6  -1 23.4750 2.76811   9
   3  -6  -1 21.5330 5.37551   1
  -3   6   1 26.0494 5.88660  10
  -3   6   1 26.1815 3.79466   5
  -3   6   1 23.8891 1.81884   4
  -3   6   1 26.0332 2.40303   7
  -3   6   1 24.2859 3.65408   3
  -3   6   1 20.5602 5.69651   1
  -3   6   1 25.4917 2.92737   9
   2  -6  -1 -5.6598 6.19826  12
   2  -6  -1 -0.0186 2.06544   1
   2  -6  -1 2.03126 1.27483   5
   2  -6  -1 0.47319 1.36717   3
   2  -6  -1 2.09003 0.97598   9
   2  -6  -1 1.91080 0.77369   6
  -2   6   1 -3.0331 1.29448  10
  -2   6   1 -0.2858 4.63563  12
  -2   6   1 0.89045 0.80186   9
  -2   6   1 0.31006 0.78266   7
  -2   6   1 5.10834 2.94636   1
  -2   6   1 0.53690 1.17992   5
   1  -6  -1 778.014 22.6465   5
   1  -6  -1 781.253 40.9771  12
   1  -6  -1 766.745 28.5730   1
   1  -6  -1 769.026 19.6285   9
   1  -6  -1 782.629 21.8607   3
   1  -6  -1 773.447 19.4641   6
  -1   6   1 778.153 23.0909   5
  -1   6   1 754.540 22.2594   3
  -1   6   1 780.817 21.0476   7
  -1   6   1 791.721 34.4008   1
  -1   6   1 763.309 38.2869  12
  -1   6   1 809.326 19.9473   9
   0  -6  -1 0.97168 0.78943   6
   0  -6  -1 -0.4827 0.84369   3
   0  -6  -1 1.08765 4.39312  12
   0  -6  -1 3.96762 1.75683  10
   0  -6  -1 1.34433 1.03294   5
   0  -6  -1 1.61978 0.58172   9
   0  -6  -1 -1.4660 1.15034   1
   0   6   1 -0.0397 0.57865   9
   0   6   1 0.67860 1.27242   5
   0   6   1 3.36549 3.49201  12
   0   6   1 3.70804 2.13530  10
   0   6   1 1.40657 1.01809   7
   0   6   1 2.72595 2.62902   1
   0   6   1 1.89899 1.07908   3
  -1  -6  -1 14.1739 1.91588   6
  -1  -6  -1 14.6085 2.28986   5
  -1  -6  -1 16.5535 7.11675  12
  -1  -6  -1 17.3658 3.98959  10
   1   6   1 18.5576 3.58589  10
   1   6   1 21.6286 6.56116  12
   1   6   1 19.3334 3.42232   5
   1   6   1 16.8097 2.33994   3
   1   6   1 10.9866 4.21074   1
   1   6   1 14.2187 2.47799   7
   1   6   1 15.9843 1.52771   4
   1   6   1 14.0861 1.75681   6
  -2  -6  -1 51.2829 4.09994   5
  -2  -6  -1 42.9725 9.00496  12
  -2  -6  -1 49.2497 3.26189   4
  -2  -6  -1 54.1829 3.61038   6
   2   6   1 44.8436 9.69247  12
   2   6   1 56.0924 4.21740   7
   2   6   1 49.4480 7.57303   1
   2   6   1 65.6051 8.06325   1
   2   6   1 56.3090 4.46341   2
   2   6   1 55.7674 3.58322   6
   2   6   1 54.9403 3.10709   4
   2   6   1 56.5510 4.49860   5
   2   6   1 52.1019 4.59011  10
  -3  -6  -1 827.349 19.2236   9
  -3  -6  -1 813.863 44.1643  12
  -3  -6  -1 825.370 22.2631   6
  -3  -6  -1 809.054 21.8253   4
  -3  -6  -1 829.309 24.4674  10
  -3  -6  -1 823.731 23.3591   5
   3   6   1 830.451 23.4009   5
   3   6   1 819.762 21.4151   4
   3   6   1 790.173 24.3811   7
   3   6   1 824.809 34.3564   1
   3   6   1 805.350 22.8560   3
   3   6   1 839.611 24.4771  10
   3   6   1 844.234 36.7719   1
   3   6   1 796.993 41.6835  12
   3   6   1 821.208 22.5381  11
   3   6   1 822.099 23.8842   6
   3   6   1 829.315 23.7452   2
  -4  -6  -1 58.6229 4.18121   6
  -4  -6  -1 63.9997 4.84349  10
  -4  -6  -1 66.6416 4.70730   2
  -4  -6  -1 60.5085 4.13840   4
  -4  -6  -1 62.4139 4.65822   5
  -4  -6  -1 65.1052 3.22091   9
  -4  -6  -1 50.5305 11.8091  12
  -4  -6  -1 59.8921 8.05123  13
   4   6   1 65.0214 9.00511   1
   4   6   1 62.3763 4.40866  11
   4   6   1 56.7914 4.50635   7
   4   6   1 58.4297 3.91920   4
   4   6   1 74.5090 10.2750   1
   4   6   1 57.7915 10.6231  12
   4   6   1 59.2282 4.07267   6
   4   6   1 59.2521 5.06766  10
   4   6   1 65.0311 4.97297   2
  -5  -6  -1 455.081 16.1628  10
  -5  -6  -1 462.224 15.1287   4
  -5  -6  -1 439.668 14.5974   6
  -5  -6  -1 452.966 14.8737  11
  -5  -6  -1 466.900 15.3335   2
  -5  -6  -1 434.770 31.9604  12
  -5  -6  -1 472.138 25.0059  13
  -5  -6  -1 446.861 13.2220   9
  -5  -6  -1 447.369 15.6692   5
   5   6   1 462.276 15.8147   2
   5   6   1 451.785 15.0441  11
   5   6   1 456.643 16.7100  10
   5   6   1 432.522 27.9600   1
   5   6   1 437.516 30.2366  12
   5   6   1 448.031 15.4460   7
   5   6   1 458.791 14.6754   4
   5   6   1 454.656 14.5797   6
  -6  -6  -1 6.87641 6.74708  12
  -6  -6  -1 3.27160 4.36362  13
  -6  -6  -1 -0.8720 3.02493   1
  -6  -6  -1 2.15481 1.73024   5
  -6  -6  -1 3.34382 1.47682   2
  -6  -6  -1 5.11871 1.73222   4
  -6  -6  -1 5.60032 1.99809  10
  -6  -6  -1 4.23293 1.58989   9
  -6  -6  -1 6.00675 1.92649   6
  -6  -6  -1 4.32279 1.52669  11
   6   6   1 4.35202 1.96789  10
   6   6   1 4.95431 1.80652   2
   6   6   1 5.25758 1.94704  11
   6   6   1 4.01336 1.56960   6
   6   6   1 8.19928 3.85775   1
   6   6   1 4.24130 1.72019   7
   6   6   1 6.43354 1.86722   4
   6   6   1 13.0819 5.66811  12
  -7  -6  -1 297.286 26.7605  12
  -7  -6  -1 311.195 12.8064   4
  -7  -6  -1 319.913 26.4006   1
  -7  -6  -1 305.286 12.3544  11
  -7  -6  -1 282.940 13.2871  10
  -7  -6  -1 303.382 11.8382   6
  -7  -6  -1 302.715 12.1564   2
  -7  -6  -1 310.393 13.7252   5
  -7  -6  -1 288.828 22.6742  13
  -7  -6  -1 306.468 11.5800   9
   7   6   1 309.165 12.7713  11
   7   6   1 321.135 25.7926  12
   7   6   1 317.457 13.2188   2
   7   6   1 314.712 25.5803   1
   7   6   1 307.291 12.2726   4
   7   6   1 309.093 14.3706  10
   7   6   1 306.493 12.4432   7
  -8  -6  -1 71.1820 5.56031   2
  -8  -6  -1 70.7382 5.50056   9
  -8  -6  -1 71.4014 5.42892   6
  -8  -6  -1 76.4269 5.97807  11
  -8  -6  -1 81.7037 6.85131  10
  -8  -6  -1 68.1999 15.0009   1
  -8  -6  -1 68.0303 7.92697   4
   8   6   1 85.2775 6.57325   2
   8   6   1 67.7154 5.60479   4
   8   6   1 69.5553 5.67647   7
   8   6   1 70.3099 14.8797   1
   8   6   1 76.7617 6.26848  11
   8   6   1 76.3673 7.51958  10
  -9  -6  -1 10.5238 3.10489   9
  -9  -6  -1 11.0234 3.01485  11
  -9  -6  -1 17.0326 4.21422  10
  -9  -6  -1 10.9935 7.08938   1
  -9  -6  -1 15.4334 3.13837   2
  -9  -6  -1 13.5271 3.30028   4
  -9  -6  -1 13.1763 2.93803   6
   9   6   1 13.5587 3.33195   4
   9   6   1 10.0507 3.24148   2
   9   6   1 22.1277 8.52656   1
   9   6   1 10.7721 3.28509  11
   9   6   1 19.1917 5.14566  10
   9   6   1 16.1067 3.46996   7
 -10  -6  -1 4.57752 3.18342  10
 -10  -6  -1 2.55124 1.87785   2
 -10  -6  -1 3.00680 1.76551   6
 -10  -6  -1 6.24195 6.81111   1
 -10  -6  -1 -1.5442 1.69725  11
 -10  -6  -1 6.45973 2.50042   9
 -10  -6  -1 1.91526 2.03381   4
  10   6   1 -6.0367 3.78353   1
  10   6   1 4.33286 2.42463   2
  10   6   1 0.72315 1.90726   7
  10   6   1 2.09365 1.50081   8
  10   6   1 3.20257 1.98193   4
  10   6   1 2.16513 2.10206  11
 -11  -6  -1 94.5801 7.68301   9
 -11  -6  -1 96.8308 7.02351   6
 -11  -6  -1 86.0315 7.19147   2
 -11  -6  -1 51.5016 15.0624   1
 -11  -6  -1 101.403 8.35469   4
  11   6   1 90.5891 7.13171   7
  11   6   1 86.2604 8.55132   2
  11   6   1 93.4033 5.45504   8
  11   6   1 90.4511 18.2931   1
  11   6   1 102.836 8.83206  11
 -12  -6  -1 24.9392 4.90990   9
 -12  -6  -1 14.5198 3.94990   2
 -12  -6  -1 22.6791 4.12398   6
 -12  -6  -1 18.0772 4.58644   4
  12   6   1 18.3066 5.35625   2
  12   6   1 24.5503 3.13467   8
  12   6   1 21.3520 5.25607  11
  12   6   1 33.2548 7.97038   7
 -13  -6  -1 163.561 12.0480   4
 -13  -6  -1 175.373 11.7441   9
 -13  -6  -1 167.124 9.78987   6
 -13  -6  -1 152.787 10.2052   2
  13   6   1 158.931 12.3135  11
  13   6   1 144.883 12.3686   2
  13   6   1 156.731 9.58065   7
 -14  -6  -1 20.7924 5.40270   9
 -14  -6  -1 13.8055 4.64699   4
 -14  -6  -1 2.43117 4.13962   2
 -14  -6  -1 12.4276 3.57210   6
  14   6   1 17.6574 4.43504   7
  14   6   1 7.49505 4.96791   2
  14   6   1 17.3874 5.53802  11
 -15  -6  -1 62.1304 8.03570   9
 -15  -6  -1 61.2988 8.45705   4
 -15  -6  -1 45.7886 6.03090   6
  15   6   1 44.2330 8.91154  11
  15   6   1 64.8761 11.0349   2
 -16  -6  -1 19.3886 5.82077   4
 -16  -6  -1 14.1917 3.51303   6
 -16  -6  -1 8.06620 4.56108   9
  16   6   1 15.2335 6.12069  11
 -17  -6  -1 21.8955 4.89693   6
 -17  -6  -1 27.3475 7.06132   4
 -17  -6  -1 23.6698 6.42930   9
  17   6   1 25.1570 6.83040  11
  12  -7  -1 9.28969 3.76134   3
 -12   7   1 5.54142 3.42242   4
 -12   7   1 11.9189 4.22544   9
 -12   7   1 3.74791 4.41619   5
  11  -7  -1 38.2357 5.74786   3
 -11   7   1 56.6398 8.88239   5
 -11   7   1 45.2367 5.52352   4
 -11   7   1 57.0392 7.47262   9
  10  -7  -1 15.5268 4.36114   3
 -10   7   1 10.7144 4.61967   5
 -10   7   1 12.7281 4.54446   8
 -10   7   1 7.77924 3.53798   9
 -10   7   1 11.4299 2.94989   4
   9  -7  -1 228.424 11.4716   3
  -9   7   1 237.124 15.1088   5
  -9   7   1 207.259 11.2330   8
  -9   7   1 222.658 10.2927   4
  -9   7   1 211.910 12.8720   9
  -8   7   1 229.335 9.80377   4
  -8   7   1 218.690 12.4851   9
  -8   7   1 227.018 14.0749   5
  -8   7   1 217.193 11.0248   8
   7  -7  -1 62.9654 5.86005   3
  -7   7   1 60.8296 4.57154   4
  -7   7   1 45.7731 6.03172   3
  -7   7   1 68.6429 6.18797   8
  -7   7   1 63.3814 7.33309   5
  -7   7   1 59.3458 6.27163   9
   6  -7  -1 105.758 6.97240   3
   6  -7  -1 82.3464 10.2323   1
  -6   7   1 104.688 7.52969   9
  -6   7   1 102.000 8.05504   3
  -6   7   1 96.2886 6.82697   8
  -6   7   1 99.7163 5.30441   4
  -6   7   1 116.033 8.70676  11
  -6   7   1 98.9153 10.6441   1
  -6   7   1 98.0492 8.47797   5
   5  -7  -1 119.072 7.24084   3
   5  -7  -1 111.044 10.4174   1
  -5   7   1 119.737 8.79365   5
  -5   7   1 104.504 7.18238   8
  -5   7   1 121.706 11.1329   1
  -5   7   1 108.428 7.16107   9
  -5   7   1 106.997 8.26576  11
  -5   7   1 112.444 5.14723   4
  -5   7   1 109.731 8.59344   3
   4  -7  -1 40.9574 4.31349   3
   4  -7  -1 42.9610 6.50553   1
  -4   7   1 41.7566 2.70626   4
  -4   7   1 38.5332 6.14168   3
  -4   7   1 40.1995 7.50566   1
  -4   7   1 39.4417 5.02766   5
  -4   7   1 43.7156 8.11575  10
  -4   7   1 36.5274 2.96339   7
  -4   7   1 35.3397 4.77499  11
  -4   7   1 44.9624 4.23782   9
   3  -7  -1 42.6443 5.87777   1
   3  -7  -1 31.6717 3.77088   3
  -3   7   1 32.4053 7.24622   1
  -3   7   1 36.5131 4.37822   3
  -3   7   1 36.4699 4.59259   5
  -3   7   1 30.6355 2.82060   7
  -3   7   1 28.9133 3.20400   9
   2  -7  -1 4.58064 1.79115   3
   2  -7  -1 3.57168 2.46256   1
   2  -7  -1 6.50267 2.16269   5
   2  -7  -1 2.40465 0.93823   6
  -2   7   1 -1.8168 3.88688   1
  -2   7   1 4.48955 1.41922   9
  -2   7   1 2.64131 1.29475   7
  -2   7   1 5.66933 1.81305   3
  -2   7   1 3.11030 1.91099   5
  -2   7   1 2.77945 2.51910  10
   1  -7  -1 257.707 10.5157   3
   1  -7  -1 274.610 8.66366   6
   1  -7  -1 220.366 23.3963  12
   1  -7  -1 267.264 10.6757   5
   1  -7  -1 270.841 15.5521   1
  -1   7   1 248.606 22.5136  12
  -1   7   1 255.128 9.81112   7
  -1   7   1 240.256 18.5333   1
  -1   7   1 275.879 10.8125   3
  -1   7   1 254.890 11.5500   5
  -1   7   1 271.522 13.7857  10
  -1   7   1 278.090 8.70556   9
   0  -7  -1 3939.10 124.671  12
   0  -7  -1 3764.88 88.3545   5
   0  -7  -1 3745.63 88.0121   3
   0  -7  -1 3801.81 99.1377   1
   0  -7  -1 3786.99 85.6539   6
   0   7   1 3789.94 92.0460  10
   0   7   1 3848.67 87.9829   7
   0   7   1 3745.49 87.9410   3
   0   7   1 3643.15 101.623   1
   0   7   1 3755.48 90.2887   5
   0   7   1 3904.02 119.008  12
  -1  -7  -1 214.766 22.4650  12
  -1  -7  -1 212.301 10.4410  10
  -1  -7  -1 215.918 9.00666   5
  -1  -7  -1 229.667 8.29190   6
   1   7   1 215.226 7.99972   6
   1   7   1 223.356 7.01302   4
   1   7   1 215.815 9.15755   7
   1   7   1 216.802 20.6757  12
   1   7   1 223.966 16.4482   1
   1   7   1 217.927 15.5498   1
   1   7   1 212.200 10.5863  10
   1   7   1 207.988 9.98136   2
   1   7   1 205.106 8.99459   3
   1   7   1 217.188 10.5434   5
  -2  -7  -1 251.776 8.89435   4
  -2  -7  -1 247.568 9.22170   6
  -2  -7  -1 234.369 23.7498  12
  -2  -7  -1 243.367 10.0169   5
  -2  -7  -1 247.419 10.9319  10
   2   7   1 231.211 12.2212   6
   2   7   1 249.483 17.2303   1
   2   7   1 239.797 11.1652  10
   2   7   1 251.267 10.9994   5
   2   7   1 242.659 10.0003   3
   2   7   1 252.767 10.9750   2
   2   7   1 250.023 8.21502   4
   2   7   1 257.728 10.3426   7
   2   7   1 267.759 18.9830   1
   2   7   1 246.220 22.5565  12
  -3  -7  -1 26.0329 9.42120  12
  -3  -7  -1 33.6836 3.04817   4
  -3  -7  -1 31.6601 3.75559  10
  -3  -7  -1 29.5584 3.08187   6
  -3  -7  -1 30.4283 3.47739   5
   3   7   1 33.5272 3.85000   2
   3   7   1 28.4827 3.43283   7
   3   7   1 29.8975 2.69746   4
   3   7   1 27.8496 3.83424  10
   3   7   1 47.4324 7.63592   1
   3   7   1 36.3890 10.8208  12
   3   7   1 36.7772 3.81980   5
   3   7   1 27.5231 7.85846   1
   3   7   1 30.7198 3.02595   6
   3   7   1 29.9724 3.40761   3
   3   7   1 34.2594 3.42126  11
  -4  -7  -1 45.0248 12.5008  12
  -4  -7  -1 55.4777 7.99645  13
  -4  -7  -1 65.3303 4.60381   6
  -4  -7  -1 60.9471 5.07644  10
  -4  -7  -1 62.9479 4.45807   4
  -4  -7  -1 62.1976 4.84413   5
  -4  -7  -1 62.5026 3.00471   9
   4   7   1 76.6223 5.71179   2
   4   7   1 64.6711 4.68172  11
   4   7   1 56.7968 3.95427   4
   4   7   1 55.0049 12.5102  12
   4   7   1 66.3126 9.23896   1
   4   7   1 57.2617 4.62630   3
   4   7   1 62.7045 5.49189  10
   4   7   1 65.6604 5.14423   5
   4   7   1 62.4124 4.36494   6
   4   7   1 65.0274 10.4201   1
   4   7   1 58.4048 4.85652   7
  -5  -7  -1 2.70146 1.35933   2
  -5  -7  -1 3.81609 1.17092   9
  -5  -7  -1 1.58052 6.35921  12
  -5  -7  -1 3.51865 1.57066   4
  -5  -7  -1 2.20589 4.00099  13
  -5  -7  -1 4.62084 1.87835   5
  -5  -7  -1 6.23209 1.85905   6
  -5  -7  -1 1.89207 1.83285  10
   5   7   1 3.24683 1.34947   6
   5   7   1 4.49554 1.95937   2
   5   7   1 4.72371 1.81091   7
   5   7   1 4.10595 1.77762  11
   5   7   1 5.88783 1.70961   4
   5   7   1 3.91870 3.78250   1
   5   7   1 8.32499 5.93003  12
   5   7   1 2.63315 2.04311  10
   5   7   1 1.54655 2.40174   1
  -6  -7  -1 188.881 9.26229   4
  -6  -7  -1 197.876 9.90062   5
  -6  -7  -1 200.850 9.30520  11
  -6  -7  -1 203.139 10.3720  10
  -6  -7  -1 178.602 29.6209  12
  -6  -7  -1 198.315 17.4952  13
  -6  -7  -1 197.116 9.05547   6
  -6  -7  -1 200.761 7.96841   9
  -6  -7  -1 196.105 9.44157   2
   6   7   1 201.403 9.11060   4
   6   7   1 193.741 25.6084   1
   6   7   1 197.575 29.9467  12
   6   7   1 211.125 9.92145   7
   6   7   1 198.799 9.39751  11
   6   7   1 208.080 11.0524  10
   6   7   1 205.330 10.2559   2
   6   7   1 186.929 8.76083   6
  -7  -7  -1 16.4555 3.33336   2
  -7  -7  -1 13.9790 3.12203   4
  -7  -7  -1 14.0418 3.50791   5
  -7  -7  -1 14.4644 2.80184   6
  -7  -7  -1 16.4256 3.45122  11
  -7  -7  -1 11.2343 3.18772  10
  -7  -7  -1 14.3584 2.69270   9
   7   7   1 15.7585 3.19378   4
   7   7   1 19.9673 5.07111  10
   7   7   1 13.3385 3.21761  11
   7   7   1 10.6000 2.62582   7
   7   7   1 17.9809 3.69877   2
   7   7   1 16.4093 7.51069   1
  -8  -7  -1 1850.41 47.9724   2
  -8  -7  -1 1837.52 46.4644   9
  -8  -7  -1 1818.52 47.0254   6
  -8  -7  -1 1686.75 114.822   1
  -8  -7  -1 1798.98 47.8559  11
  -8  -7  -1 1840.95 50.2529  10
  -8  -7  -1 1851.22 48.8719   4
  -8  -7  -1 1860.12 50.2873   5
   8   7   1 1903.42 76.4820   1
   8   7   1 1700.11 52.5257  11
   8   7   1 1912.01 49.8192   2
   8   7   1 1842.39 47.9261   4
   8   7   1 1852.79 48.3421   7
   8   7   1 1807.36 51.5732  10
  -9  -7  -1 71.9906 16.1161   1
  -9  -7  -1 67.0741 6.94594   5
  -9  -7  -1 77.1088 6.59276  11
  -9  -7  -1 83.7963 6.30210   9
  -9  -7  -1 87.2819 7.23128   4
  -9  -7  -1 71.9232 5.96690   6
  -9  -7  -1 69.9815 6.00062   2
   9   7   1 76.6720 6.97225   4
   9   7   1 81.8751 7.06354  11
   9   7   1 66.3538 6.08537   7
   9   7   1 69.9714 7.73597  10
   9   7   1 78.3762 17.1361   1
   9   7   1 81.0123 7.25497   2
 -10  -7  -1 129.847 8.29617   2
 -10  -7  -1 141.511 8.74928   9
 -10  -7  -1 128.844 8.80684  11
 -10  -7  -1 133.276 8.13899   6
 -10  -7  -1 112.018 9.27897  10
 -10  -7  -1 135.905 9.43105   4
 -10  -7  -1 122.851 19.6191   1
  10   7   1 134.881 19.6199   1
  10   7   1 114.143 8.08927   7
  10   7   1 127.678 9.38146   2
  10   7   1 142.593 11.3358  10
  10   7   1 128.071 7.03657   8
  10   7   1 120.416 8.39382   4
  10   7   1 126.027 9.26149  11
 -11  -7  -1 10.0445 3.35239   9
 -11  -7  -1 8.57744 2.83333   6
 -11  -7  -1 8.29358 3.39967   4
 -11  -7  -1 8.89552 7.47657   1
 -11  -7  -1 10.5725 3.37840   2
  11   7   1 10.9246 2.51445   8
  11   7   1 7.84012 2.95040   7
  11   7   1 21.7530 11.1744   1
  11   7   1 8.57863 3.57790  11
  11   7   1 11.9119 4.00313   2
 -12  -7  -1 124.521 10.1062   4
 -12  -7  -1 139.039 9.79538   9
 -12  -7  -1 129.126 9.37702   2
 -12  -7  -1 126.237 8.55617   6
  12   7   1 137.200 7.12268   8
  12   7   1 118.593 8.69477   7
  12   7   1 105.045 9.94342   2
  12   7   1 126.061 10.4507  11
 -13  -7  -1 -0.2062 1.76053   6
 -13  -7  -1 -0.9531 2.17592   9
 -13  -7  -1 1.36268 2.58818   2
 -13  -7  -1 -0.6371 2.22296   4
  13   7   1 -3.1154 2.67967   7
  13   7   1 -3.5948 2.34682   2
  13   7   1 0.45300 2.54979  11
  13   7   1 -3.1421 1.37824   8
 -14  -7  -1 12.9922 3.58549   6
 -14  -7  -1 3.96098 2.78812   9
 -14  -7  -1 11.2112 4.47817   4
  14   7   1 2.67619 4.53312   2
  14   7   1 6.97313 3.83550  11
 -15  -7  -1 6.88586 4.49886   9
 -15  -7  -1 2.08064 1.85389   6
 -15  -7  -1 -0.0733 2.70470   4
  15   7   1 -1.1155 4.35004   2
  15   7   1 3.97111 3.67433  11
 -16  -7  -1 480.498 23.4080   9
 -16  -7  -1 469.659 19.3846   6
 -16  -7  -1 498.848 24.1690   4
  16   7   1 436.044 26.7997   2
  16   7   1 457.785 24.4858  11
 -17  -7  -1 3.84273 4.25902   4
 -17  -7  -1 -1.6076 3.16618   9
  17   7   1 2.90757 4.17957  11
  12  -8  -1 15.3791 4.04637   3
 -12   8   1 17.2040 3.60174   4
 -12   8   1 4.91818 4.63829   5
 -12   8   1 4.90692 4.25039   9
  11  -8  -1 8.12750 3.20006   3
 -11   8   1 5.03139 3.93766   5
 -11   8   1 1.47385 2.57737   4
 -11   8   1 10.9342 4.55218   9
  10  -8  -1 4.25310 2.95332   3
 -10   8   1 -6.7922 3.88936   8
 -10   8   1 2.83650 3.35394   4
 -10   8   1 -1.2827 2.84629   9
 -10   8   1 5.30666 3.07824   5
   9  -8  -1 14.7560 4.19596   3
  -9   8   1 16.8124 3.04544   4
  -9   8   1 18.3204 5.28684   5
  -9   8   1 11.9239 4.30246   9
  -9   8   1 19.2434 4.46496   8
   8  -8  -1 301.981 13.3501   3
  -8   8   1 283.770 13.1495   8
  -8   8   1 275.787 14.5264   9
  -8   8   1 285.310 10.9643   4
  -8   8   1 276.029 16.1711   5
   7  -8  -1 43.3402 5.72490   3
  -7   8   1 63.4203 5.75722   8
  -7   8   1 51.2208 7.99511  10
  -7   8   1 52.9625 5.98055   9
  -7   8   1 51.2472 6.32989   3
  -7   8   1 47.4266 3.96503   4
  -7   8   1 40.8041 7.15319   5
   6  -8  -1 5.04866 2.54523   3
  -6   8   1 2.24393 2.64915   8
  -6   8   1 5.71305 2.96674   5
  -6   8   1 3.81373 1.62666   4
  -6   8   1 15.0346 5.44388  10
  -6   8   1 3.03164 2.25213   9
  -6   8   1 2.75905 2.83314   3
   5  -8  -1 92.1497 8.96767   1
   5  -8  -1 80.0561 6.31188   3
  -5   8   1 82.1705 7.73313   5
  -5   8   1 88.8396 5.51371   7
  -5   8   1 80.5811 4.38403   7
  -5   8   1 78.2492 6.45398   9
  -5   8   1 91.7447 6.95404   8
  -5   8   1 95.2719 9.90012   1
  -5   8   1 75.4178 9.40150  10
  -5   8   1 86.0103 7.84698  11
  -5   8   1 79.6332 8.08023   3
   4  -8  -1 23.9988 4.12335   3
   4  -8  -1 17.1076 4.77103   1
  -4   8   1 23.0242 6.40277  10
  -4   8   1 28.9961 3.04638   7
  -4   8   1 24.3204 6.23040   1
  -4   8   1 21.8492 4.55036   5
  -4   8   1 26.2433 3.56298   9
  -4   8   1 26.1359 5.20858   3
  -4   8   1 25.0665 4.50321  11
   3  -8  -1 2.48968 2.20245   1
   3  -8  -1 8.63488 2.62908   3
  -3   8   1 3.57627 1.47374   7
  -3   8   1 0.83947 2.63079  10
  -3   8   1 9.92862 2.91818   3
  -3   8   1 1.03918 1.50229   9
  -3   8   1 6.97950 3.92876   1
   2  -8  -1 0.34143 0.80899   6
   2  -8  -1 -0.7416 1.18082   3
   2  -8  -1 0.51460 3.04515   1
  -2   8   1 3.47002 5.27709   1
  -2   8   1 -1.2234 1.35302   5
  -2   8   1 1.49842 2.42717  10
  -2   8   1 1.98926 1.48050   3
   1  -8  -1 36.2772 6.29095   1
   1  -8  -1 35.5773 3.94729   5
   1  -8  -1 36.3068 4.03358   3
   1  -8  -1 36.5485 2.91589   6
  -1   8   1 38.1694 6.71535  10
  -1   8   1 39.7233 4.94000   5
  -1   8   1 37.6133 2.85955   9
  -1   8   1 37.7956 3.72737   7
  -1   8   1 40.8314 9.94035   1
  -1   8   1 40.5394 4.07873   3
   0  -8  -1 521.427 16.7472   5
   0  -8  -1 505.153 14.9647   6
   0   8   1 460.345 25.1842   1
   0   8   1 504.101 16.8405   3
   0   8   1 501.603 16.4151   7
   0   8   1 505.276 19.0003   5
   0   8   1 503.056 19.8211  10
  -1  -8  -1 1159.31 29.9580   6
  -1  -8  -1 1172.35 34.1421  10
  -1  -8  -1 1219.43 61.7646  12
   1   8   1 1187.69 34.7087  10
   1   8   1 1155.69 31.6979   3
   1   8   1 1106.83 43.2958   1
   1   8   1 1165.24 45.3958   1
   1   8   1 1193.63 28.1231   4
   1   8   1 1163.16 34.3259   5
   1   8   1 1144.89 33.3353   2
   1   8   1 1142.62 31.5500   7
   1   8   1 1175.76 57.5709  12
  -2  -8  -1 15.9943 2.57756   6
  -2  -8  -1 22.0512 3.43556  10
  -2  -8  -1 9.55947 7.08719  12
  -2  -8  -1 20.3055 2.99749   5
   2   8   1 24.4026 3.75455   5
   2   8   1 21.7638 2.12391   4
   2   8   1 21.3331 2.53336   6
   2   8   1 20.8649 3.10119   3
   2   8   1 18.8197 5.83042   1
   2   8   1 20.2356 3.97244  10
   2   8   1 17.8749 3.74236   2
   2   8   1 25.4192 10.2535  12
   2   8   1 23.4414 3.12855   7
   2   8   1 21.9832 6.58553   1
  -3  -8  -1 9.04792 2.49444   5
  -3  -8  -1 8.38200 2.03502   4
  -3  -8  -1 14.3251 6.91432  12
  -3  -8  -1 9.26595 2.57913  10
  -3  -8  -1 9.45880 2.07688   6
   3   8   1 14.9484 5.38985   1
   3   8   1 9.38438 2.86571   2
   3   8   1 11.4415 2.75967   7
   3   8   1 11.4282 2.74464   3
   3   8   1 10.5642 2.25155   6
   3   8   1 9.35231 3.00564  10
   3   8   1 10.6477 4.45832   1
   3   8   1 4.39281 5.51031  12
   3   8   1 11.8852 2.87572   5
   3   8   1 11.0914 2.07527   4
  -4  -8  -1 23.7486 10.6335  12
  -4  -8  -1 22.2260 3.05225   6
  -4  -8  -1 17.8818 2.73539   4
  -4  -8  -1 23.5229 3.63377   5
  -4  -8  -1 23.7226 3.42154  10
   4   8   1 19.8708 4.22520  10
   4   8   1 23.3375 3.14173  11
   4   8   1 5.74317 7.53918  12
   4   8   1 24.9678 3.72400   2
   4   8   1 25.2092 3.00548   6
   4   8   1 22.7979 6.62448   1
   4   8   1 22.0123 3.24101   3
   4   8   1 24.1114 4.10576   5
   4   8   1 32.3695 9.27141   1
   4   8   1 21.7767 3.29922   7
  -5  -8  -1 55.5082 5.13103   5
  -5  -8  -1 56.2839 5.26448  10
  -5  -8  -1 59.9610 4.84381   6
  -5  -8  -1 56.8709 11.7653  13
  -5  -8  -1 59.4215 16.1583  12
  -5  -8  -1 55.7020 4.92670   2
  -5  -8  -1 53.8522 3.16569   9
  -5  -8  -1 57.0420 4.70663   4
   5   8   1 52.0193 5.22117   2
   5   8   1 54.1732 4.32952   4
   5   8   1 47.7108 5.35379  10
   5   8   1 59.1284 5.11038   7
   5   8   1 59.5667 4.53381   6
   5   8   1 60.5696 4.93516  11
   5   8   1 45.7968 11.1931   1
   5   8   1 57.1448 12.1260   1
   5   8   1 41.7364 11.6724  12
   5   8   1 62.1767 5.08323   3
  -6  -8  -1 0.35811 1.22099   6
  -6  -8  -1 0.38268 1.31399   4
  -6  -8  -1 3.15277 1.65216   5
  -6  -8  -1 0.84939 1.21343   2
  -6  -8  -1 0.47784 0.90103   9
  -6  -8  -1 -0.3029 1.37098  10
   6   8   1 -0.7676 1.07981   7
   6   8   1 -0.6066 1.28820  11
   6   8   1 1.68894 1.07412   4
   6   8   1 0.39195 0.97727   6
   6   8   1 1.60503 4.04707   1
   6   8   1 -0.3318 1.21267   2
   6   8   1 0.32859 1.34460  10
   6   8   1 7.15868 5.17310   1
  -7  -8  -1 18.6119 3.79098  10
  -7  -8  -1 21.1884 3.66110   6
  -7  -8  -1 21.5976 3.93951  11
  -7  -8  -1 17.9900 2.65643   9
  -7  -8  -1 20.7838 3.70888   2
  -7  -8  -1 19.4529 3.60278   4
  -7  -8  -1 21.5571 4.25979   5
   7   8   1 17.6847 4.27237  10
   7   8   1 23.8331 4.08684   7
   7   8   1 21.4925 4.48084   2
   7   8   1 25.8773 3.81582  11
   7   8   1 14.1707 6.69340   1
   7   8   1 17.9212 3.29545   4
  -8  -8  -1 55.9615 6.08884  10
  -8  -8  -1 64.8771 5.61798   2
  -8  -8  -1 45.9198 5.85900   5
  -8  -8  -1 63.1107 5.98227   4
  -8  -8  -1 53.3350 5.23057  11
  -8  -8  -1 58.2948 5.39810   6
  -8  -8  -1 54.9369 4.66289   9
   8   8   1 58.6234 5.88237  11
   8   8   1 57.2412 5.59576   7
   8   8   1 51.6034 6.52449  10
   8   8   1 51.6232 10.2597   2
   8   8   1 61.0689 14.4348   1
   8   8   1 50.9634 5.04772   4
  -9  -8  -1 927.663 31.7501  10
  -9  -8  -1 988.922 32.2330   5
  -9  -8  -1 970.653 28.4610   9
  -9  -8  -1 974.334 29.9276   2
  -9  -8  -1 994.885 31.0108   4
  -9  -8  -1 961.536 30.1532  11
  -9  -8  -1 961.877 29.1016   6
   9   8   1 934.046 53.0896   1
   9   8   1 1010.34 31.3804   7
   9   8   1 983.099 31.6190   2
   9   8   1 994.358 34.0914  10
   9   8   1 957.964 30.0347   4
   9   8   1 1012.87 30.8955  11
 -10  -8  -1 6.91844 2.61770   6
 -10  -8  -1 7.67521 3.66390  10
 -10  -8  -1 7.17413 3.89799   5
 -10  -8  -1 9.34278 2.82136   9
 -10  -8  -1 -0.2486 7.26799   1
 -10  -8  -1 10.5374 3.28941   4
 -10  -8  -1 4.81119 2.46051  11
 -10  -8  -1 5.68574 2.77637   2
  10   8   1 7.96339 3.13368  11
  10   8   1 7.20305 3.53037  10
  10   8   1 8.57992 2.96830   7
  10   8   1 8.06130 2.75805   4
  10   8   1 3.39293 6.77264   1
  10   8   1 8.17848 3.45355   2
 -11  -8  -1 55.6963 7.03669   2
 -11  -8  -1 54.8904 7.27643   5
 -11  -8  -1 34.5259 5.05138   6
 -11  -8  -1 49.8285 5.63860   9
 -11  -8  -1 57.9989 6.69448   4
  11   8   1 47.8305 4.68809   8
  11   8   1 38.9573 6.14317   2
  11   8   1 41.7195 6.10837  11
  11   8   1 48.2294 7.40555  10
  11   8   1 48.6442 5.90870   7
 -12  -8  -1 11.2843 3.83152   9
 -12  -8  -1 14.6447 3.60358   6
 -12  -8  -1 14.1889 3.52547   2
 -12  -8  -1 19.8396 5.10826   4
  12   8   1 13.5257 4.62729  11
  12   8   1 18.7810 3.56143   8
  12   8   1 20.9891 5.59288   2
 -13  -8  -1 180.870 12.7200   4
 -13  -8  -1 185.226 11.9364   9
 -13  -8  -1 179.244 10.5279   6
 -13  -8  -1 148.378 16.0863   2
  13   8   1 150.420 12.2642   2
  13   8   1 154.909 8.21502   8
  13   8   1 162.744 12.3164  11
 -14  -8  -1 65.0237 7.99316   9
 -14  -8  -1 60.5619 8.07960   4
 -14  -8  -1 66.2140 6.90308   6
  14   8   1 62.5264 5.28291   8
  14   8   1 60.3759 8.27420  11
  14   8   1 70.2475 9.20132   2
 -15  -8  -1 8.12633 5.47493   9
 -15  -8  -1 13.9444 4.95629   4
 -15  -8  -1 4.57996 2.93897   6
  15   8   1 7.15165 5.06100   2
  15   8   1 1.35723 3.65380  11
 -16  -8  -1 6.41863 4.27816   4
 -16  -8  -1 2.33488 3.31385   9
  16   8   1 0.74949 4.11635  11
  16   8   1 6.44982 5.76846   2
 -17  -8  -1 317.711 19.1380   9
 -17  -8  -1 283.982 19.1048   4
 -17  -8  -1 317.508 15.7647   6
  17   8   1 235.994 21.8795   2
  17   8   1 297.041 19.8108  11
  11  -9  -1 42.8109 6.53572   3
 -11   9   1 44.2494 10.8870  10
 -11   9   1 47.8653 7.85678   9
 -11   9   1 51.0993 10.2378   5
  10  -9  -1 16.1282 3.96688   3
 -10   9   1 8.77902 2.66302   4
[truncated: 3,073,783 more chars]
