# Supplementary material for: Bis(m-Iodo)-Tetrakis(<em>O</em>-Methyl <em>N</em>-Phenylthiocarbamate)-Tetraiodo-Dibismuth
Source: Preprints.org preprint supplement (doi:10.20944/preprints202205.0129.v1), 2022-05-10
Supplement: Supplementary file 3 [file supplementary › Molfile 3000 compound 1 Bi2I6.mol]

Molfile 3000 compound 1 Bi2I6.mol
  ChemDraw04292207572D

  0  0  0     0  0              0 V3000
M  V30 BEGIN CTAB
M  V30 COUNTS 60 60 4 0 1
M  V30 BEGIN ATOM
M  V30 1 I -2.540093 1.131493 0.000000 0
M  V30 2 Bi -1.206787 0.479890 0.000000 0
M  V30 3 I 0.171262 1.157539 0.000000 0
M  V30 4 I -2.381620 -0.451370 0.000000 0
M  V30 5 I 2.876192 1.373730 0.000000 0
M  V30 6 Bi 1.604722 0.547366 0.000000 0
M  V30 7 I 0.250444 -0.242152 0.000000 0
M  V30 8 I 2.932607 0.002593 0.000000 0
M  V30 9 C -1.206787 1.191920 0.000000 0
M  V30 10 C -1.130398 -0.537695 0.000000 0
M  V30 11 C 1.604722 1.259396 0.000000 0
M  V30 12 C 1.678892 -0.275919 0.000000 0
M  V30 13 C -1.023561 -1.847034 0.000000 0
M  V30 14 S -1.270427 -0.965186 0.000000 0
M  V30 15 N -0.265546 -2.050448 0.000000 0
M  V30 16 C -0.426524 -2.927989 0.000000 0
M  V30 17 H 0.305125 -1.329978 0.000000 0
M  V30 18 C -1.384980 -3.191958 0.000000 0
M  V30 19 C -1.635604 -4.153990 0.000000 0
M  V30 20 C -0.927772 -4.852054 0.000000 0
M  V30 21 C 0.030685 -4.588084 0.000000 0
M  V30 22 C 0.281309 -3.626051 0.000000 0
M  V30 23 O -1.578730 -2.401786 0.000000 0
M  V30 24 C -1.366243 -3.195988 0.000000 0
M  V30 25 C 1.926708 -1.462492 0.000000 0
M  V30 26 S 1.679842 -0.580644 0.000000 0
M  V30 27 N 2.684723 -1.665907 0.000000 0
M  V30 28 H 2.740022 -2.790916 0.000000 0
M  V30 29 C 3.542105 -1.415916 0.000000 0
M  V30 30 C 4.124882 -1.999864 0.000000 0
M  V30 31 C 4.921985 -1.787139 0.000000 0
M  V30 32 C 5.136310 -0.990465 0.000000 0
M  V30 33 C 4.553533 -0.406516 0.000000 0
M  V30 34 C 3.756431 -0.619242 0.000000 0
M  V30 35 O 1.371539 -2.017244 0.000000 0
M  V30 36 C 1.584026 -2.811446 0.000000 0
M  V30 37 C -1.648794 2.289758 0.000000 0
M  V30 38 S -1.320206 1.434987 0.000000 0
M  V30 39 N -2.422561 2.421088 0.000000 0
M  V30 40 C -3.496098 2.303630 0.000000 0
M  V30 41 C -3.983859 2.968998 0.000000 0
M  V30 42 C -4.803965 2.879269 0.000000 0
M  V30 43 C -5.136310 2.124172 0.000000 0
M  V30 44 C -4.648549 1.458804 0.000000 0
M  V30 45 C -3.828443 1.548533 0.000000 0
M  V30 46 H -2.502168 3.625753 0.000000 0
M  V30 47 O -1.148174 2.894193 0.000000 0
M  V30 48 C -1.434302 3.664931 0.000000 0
M  V30 49 C 1.939878 2.404312 0.000000 0
M  V30 50 S 1.552660 1.574454 0.000000 0
M  V30 51 N 1.497317 3.052466 0.000000 0
M  V30 52 H 1.193146 3.912211 0.000000 0
M  V30 53 C 2.711376 3.683045 0.000000 0
M  V30 54 C 3.386303 3.208600 0.000000 0
M  V30 55 C 4.134648 3.555882 0.000000 0
M  V30 56 C 4.208065 4.377608 0.000000 0
M  V30 57 C 3.533138 4.852054 0.000000 0
M  V30 58 C 2.784793 4.504772 0.000000 0
M  V30 59 O 2.722476 2.463502 0.000000 0
M  V30 60 C 3.078676 3.204467 0.000000 0
M  V30 END ATOM
M  V30 BEGIN BOND
M  V30 1 1 3 2 CFG=3
M  V30 2 1 2 4
M  V30 3 1 6 7
M  V30 4 1 7 2
M  V30 5 1 3 6
M  V30 6 1 5 6
M  V30 7 1 2 1
M  V30 8 1 6 8
M  V30 9 1 2 9
M  V30 10 1 2 10
M  V30 11 1 6 11
M  V30 12 1 6 12
M  V30 13 1 23 24
M  V30 14 1 13 23
M  V30 15 1 13 15
M  V30 16 1 15 16
M  V30 17 2 13 14
M  V30 18 1 15 17
M  V30 19 2 16 18
M  V30 20 1 18 19
M  V30 21 2 19 20
M  V30 22 1 20 21
M  V30 23 2 21 22
M  V30 24 1 22 16
M  V30 25 1 35 36
M  V30 26 1 25 35
M  V30 27 1 25 27
M  V30 28 2 25 26
M  V30 29 1 27 28
M  V30 30 1 27 29
M  V30 31 2 29 30
M  V30 32 1 30 31
M  V30 33 2 31 32
M  V30 34 1 32 33
M  V30 35 2 33 34
M  V30 36 1 34 29
M  V30 37 1 47 48
M  V30 38 1 37 47
M  V30 39 1 37 39
M  V30 40 1 39 40
M  V30 41 2 37 38
M  V30 42 2 40 41
M  V30 43 1 41 42
M  V30 44 2 42 43
M  V30 45 1 43 44
M  V30 46 2 44 45
M  V30 47 1 45 40
M  V30 48 1 39 46
M  V30 49 1 59 60
M  V30 50 1 49 59
M  V30 51 1 49 51
M  V30 52 2 49 50
M  V30 53 1 51 52
M  V30 54 1 51 53
M  V30 55 2 53 54
M  V30 56 1 54 55
M  V30 57 2 55 56
M  V30 58 1 56 57
M  V30 59 2 57 58
M  V30 60 1 58 53
M  V30 END BOND
M  V30 BEGIN SGROUP
M  V30 1 SUP 1 ATOMS=(2 23 24) XBONDS=(1 14) LABEL="^OMe" CSTATE=(4 14 -
M  V30 0.555169 0.554753 0)
M  V30 2 SUP 2 ATOMS=(2 35 36) XBONDS=(1 26) LABEL="^OMe" CSTATE=(4 26 -
M  V30 0.555169 0.554753 0)
M  V30 3 SUP 3 ATOMS=(2 47 48) XBONDS=(1 38) LABEL=OMe CSTATE=(4 38 -0.500620 -
M  V30 -0.604435 0)
M  V30 4 SUP 4 ATOMS=(2 59 60) XBONDS=(1 50) LABEL=OMe CSTATE=(4 50 -0.782598 -
M  V30 -0.059190 0)
M  V30 END SGROUP
M  V30 BEGIN COLLECTION
M  V30 MDLV30/STEABS ATOMS=(1 3)
M  V30 END COLLECTION
M  V30 END CTAB
M  END
