# Supplementary material for: Bis(m-Iodo)-Tetrakis(<em>O</em>-Methyl <em>N</em>-Phenylthiocarbamate)-Tetraiodo-Dibismuth
Source: Preprints.org preprint supplement (doi:10.20944/preprints202205.0129.v1), 2022-05-10
Supplement: Supplementary file 3 [file supplementary › Molfile compound 1 Bi2I6.mol]

Molfile compound 1 Bi2I6.mol
  ChemDraw04292207562D

 60 60  0  0  1  0  0  0  0  0999 V2000
   -2.5401    1.1315    0.0000 I   0  0  0  0  0  0  0  0  0  0  0  0
   -1.2068    0.4799    0.0000 Bi  0  0  0  0  0  0  0  0  0  0  0  0
    0.1713    1.1575    0.0000 I   0  0  0  0  0  0  0  0  0  0  0  0
   -2.3816   -0.4514    0.0000 I   0  0  0  0  0  0  0  0  0  0  0  0
    2.8762    1.3737    0.0000 I   0  0  0  0  0  0  0  0  0  0  0  0
    1.6047    0.5474    0.0000 Bi  0  0  0  0  0  0  0  0  0  0  0  0
    0.2504   -0.2422    0.0000 I   0  0  0  0  0  0  0  0  0  0  0  0
    2.9326    0.0026    0.0000 I   0  0  0  0  0  0  0  0  0  0  0  0
   -1.2068    1.1919    0.0000 C   0  0  0  0  0  0  0  0  0  0  0  0
   -1.1304   -0.5377    0.0000 C   0  0  0  0  0  0  0  0  0  0  0  0
    1.6047    1.2594    0.0000 C   0  0  0  0  0  0  0  0  0  0  0  0
    1.6789   -0.2759    0.0000 C   0  0  0  0  0  0  0  0  0  0  0  0
   -1.0236   -1.8470    0.0000 C   0  0  0  0  0  0  0  0  0  0  0  0
   -1.2704   -0.9652    0.0000 S   0  0  0  0  0  0  0  0  0  0  0  0
   -0.2655   -2.0504    0.0000 N   0  0  0  0  0  0  0  0  0  0  0  0
   -0.4265   -2.9280    0.0000 C   0  0  0  0  0  0  0  0  0  0  0  0
    0.3051   -1.3300    0.0000 H   0  0  0  0  0  0  0  0  0  0  0  0
   -1.3850   -3.1920    0.0000 C   0  0  0  0  0  0  0  0  0  0  0  0
   -1.6356   -4.1540    0.0000 C   0  0  0  0  0  0  0  0  0  0  0  0
   -0.9278   -4.8521    0.0000 C   0  0  0  0  0  0  0  0  0  0  0  0
    0.0307   -4.5881    0.0000 C   0  0  0  0  0  0  0  0  0  0  0  0
    0.2813   -3.6261    0.0000 C   0  0  0  0  0  0  0  0  0  0  0  0
   -1.5787   -2.4018    0.0000 O   0  0  0  0  0  0  0  0  0  0  0  0
   -1.3662   -3.1960    0.0000 C   0  0  0  0  0  0  0  0  0  0  0  0
    1.9267   -1.4625    0.0000 C   0  0  0  0  0  0  0  0  0  0  0  0
    1.6798   -0.5806    0.0000 S   0  0  0  0  0  0  0  0  0  0  0  0
    2.6847   -1.6659    0.0000 N   0  0  0  0  0  0  0  0  0  0  0  0
    2.7400   -2.7909    0.0000 H   0  0  0  0  0  0  0  0  0  0  0  0
    3.5421   -1.4159    0.0000 C   0  0  0  0  0  0  0  0  0  0  0  0
    4.1249   -1.9999    0.0000 C   0  0  0  0  0  0  0  0  0  0  0  0
    4.9220   -1.7871    0.0000 C   0  0  0  0  0  0  0  0  0  0  0  0
    5.1363   -0.9905    0.0000 C   0  0  0  0  0  0  0  0  0  0  0  0
    4.5535   -0.4065    0.0000 C   0  0  0  0  0  0  0  0  0  0  0  0
    3.7564   -0.6192    0.0000 C   0  0  0  0  0  0  0  0  0  0  0  0
    1.3715   -2.0172    0.0000 O   0  0  0  0  0  0  0  0  0  0  0  0
    1.5840   -2.8114    0.0000 C   0  0  0  0  0  0  0  0  0  0  0  0
   -1.6488    2.2898    0.0000 C   0  0  0  0  0  0  0  0  0  0  0  0
   -1.3202    1.4350    0.0000 S   0  0  0  0  0  0  0  0  0  0  0  0
   -2.4226    2.4211    0.0000 N   0  0  0  0  0  0  0  0  0  0  0  0
   -3.4961    2.3036    0.0000 C   0  0  0  0  0  0  0  0  0  0  0  0
   -3.9839    2.9690    0.0000 C   0  0  0  0  0  0  0  0  0  0  0  0
   -4.8040    2.8793    0.0000 C   0  0  0  0  0  0  0  0  0  0  0  0
   -5.1363    2.1242    0.0000 C   0  0  0  0  0  0  0  0  0  0  0  0
   -4.6485    1.4588    0.0000 C   0  0  0  0  0  0  0  0  0  0  0  0
   -3.8284    1.5485    0.0000 C   0  0  0  0  0  0  0  0  0  0  0  0
   -2.5022    3.6258    0.0000 H   0  0  0  0  0  0  0  0  0  0  0  0
   -1.1482    2.8942    0.0000 O   0  0  0  0  0  0  0  0  0  0  0  0
   -1.4343    3.6649    0.0000 C   0  0  0  0  0  0  0  0  0  0  0  0
    1.9399    2.4043    0.0000 C   0  0  0  0  0  0  0  0  0  0  0  0
    1.5527    1.5745    0.0000 S   0  0  0  0  0  0  0  0  0  0  0  0
    1.4973    3.0525    0.0000 N   0  0  0  0  0  0  0  0  0  0  0  0
    1.1931    3.9122    0.0000 H   0  0  0  0  0  0  0  0  0  0  0  0
    2.7114    3.6830    0.0000 C   0  0  0  0  0  0  0  0  0  0  0  0
    3.3863    3.2086    0.0000 C   0  0  0  0  0  0  0  0  0  0  0  0
    4.1346    3.5559    0.0000 C   0  0  0  0  0  0  0  0  0  0  0  0
    4.2081    4.3776    0.0000 C   0  0  0  0  0  0  0  0  0  0  0  0
    3.5331    4.8521    0.0000 C   0  0  0  0  0  0  0  0  0  0  0  0
    2.7848    4.5048    0.0000 C   0  0  0  0  0  0  0  0  0  0  0  0
    2.7225    2.4635    0.0000 O   0  0  0  0  0  0  0  0  0  0  0  0
    3.0787    3.2045    0.0000 C   0  0  0  0  0  0  0  0  0  0  0  0
  3  2  1  6      
  2  4  1  0      
  6  7  1  0      
  7  2  1  0      
  3  6  1  0      
  5  6  1  0      
  2  1  1  0      
  6  8  1  0      
  2  9  1  0      
  2 10  1  0      
  6 11  1  0      
  6 12  1  0      
 23 24  1  0      
 13 23  1  0      
 13 15  1  0      
 15 16  1  0      
 13 14  2  0      
 15 17  1  0      
 16 18  2  0      
 18 19  1  0      
 19 20  2  0      
 20 21  1  0      
 21 22  2  0      
 22 16  1  0      
 35 36  1  0      
 25 35  1  0      
 25 27  1  0      
 25 26  2  0      
 27 28  1  0      
 27 29  1  0      
 29 30  2  0      
 30 31  1  0      
 31 32  2  0      
 32 33  1  0      
 33 34  2  0      
 34 29  1  0      
 47 48  1  0      
 37 47  1  0      
 37 39  1  0      
 39 40  1  0      
 37 38  2  0      
 40 41  2  0      
 41 42  1  0      
 42 43  2  0      
 43 44  1  0      
 44 45  2  0      
 45 40  1  0      
 39 46  1  0      
 59 60  1  0      
 49 59  1  0      
 49 51  1  0      
 49 50  2  0      
 51 52  1  0      
 51 53  1  0      
 53 54  2  0      
 54 55  1  0      
 55 56  2  0      
 56 57  1  0      
 57 58  2  0      
 58 53  1  0      
M  STY  1   1 SUP
M  SLB  1   1   1
M  SAL   1  2  23  24
M  SBL   1  1  14
M  SMT   1 ^OMe
M  SBV   1  14    0.5552    0.5548
M  STY  1   2 SUP
M  SLB  1   2   2
M  SAL   2  2  35  36
M  SBL   2  1  26
M  SMT   2 ^OMe
M  SBV   2  26    0.5552    0.5548
M  STY  1   3 SUP
M  SLB  1   3   3
M  SAL   3  2  47  48
M  SBL   3  1  38
M  SMT   3 OMe
M  SBV   3  38   -0.5006   -0.6044
M  STY  1   4 SUP
M  SLB  1   4   4
M  SAL   4  2  59  60
M  SBL   4  1  50
M  SMT   4 OMe
M  SBV   4  50   -0.7826   -0.0592
M  END
